# Supplementary material
Source: publisher figshare collection journal article supplement (https://gsajournals.figshare.com/ndownloader/files/22015053)
Supplement: Supplementary file 1 [file 22015053]

## Sheet: orthoDB
n	stickleback_ENS_ID	stickleback_gene_description	tilapia_ENS_ID	tilapia_gene_description_ODB	tilapia_gene_name_ENS	tilapia_gene_description_ENS	stickleback_count_ids	tilapia_count_ids	OG_present?	T30_tilapia_DGE	11KT30_tilapia_DGE	T60_tilapia_DGE	11KT60_tilapia_DGE	D30_stickleback_DGE	D60_stickleback_DGE	D120_stickleback_DGE	T30_stickleback_DGE	T60_stickleback_DGE	T120_stickleback_DGE
EOG090C02G3	ENSGACG00000020026	PTPRF interacting protein, binding protein 1a (liprin beta 1)	ENSONIG00000000001	PTPRF interacting protein, binding protein 1a (liprin beta 1)	ppfibp1a	liprin-beta-1	1	1	no	0	0	0	0	0	0	0	0	0	0
EOG090C0A8R	ENSGACG00000020019	cytochrome b5 reductase 3	ENSONIG00000000002	NADH-cytochrome b5 reductase	cyb5r3	NADH-cytochrome b5 reductase 3	1	1	no	0	0	0	0	0	0	0	0	0	0
EOG090C08H3	ENSGACG00000013113;ENSGACG00000020017	synaptotagmin Ib ;synaptotagmin Ia	ENSONIG00000000003;ENSONIG00000015085	Similarity:Contains 2 C2 domains.;Similarity:Contains 2 C2 domains.	syt1a;syt1b	synaptotagmin 1 ;synaptotagmin-1	2	2	yes	0	0	0	0	0	0	0	0	1	0
EOG090C0AV3	ENSGACG00000020015	PRKC, apoptosis, WT1, regulator	ENSONIG00000000004	PRKC, apoptosis, WT1, regulator	pawr	pro-apoptotic WT1 regulator	1	1	no	0	0	0	0	0	0	0	0	0	0
EOG090C03FN	ENSGACG00000020012	protein phosphatase 1, regulatory subunit 12A	ENSONIG00000000005	Protein phosphatase 1 regulatory subunit	ppp1r12a	protein phosphatase 1, regulatory subunit 12A	1	1	no	0	0	0	0	0	0	0	0	0	0
EOG090C0F3B	ENSGACG00000020009	ribosomal protein S16	ENSONIG00000000006	Similarity:Belongs to the ribosomal protein S9P family.	rps16	ribosomal protein S16	1	1	yes	0	1	0	0	0	0	0	0	0	0
EOG090C0ECI	ENSGACG00000020008	myogenic factor 6	ENSONIG00000000007	Similarity:Contains 1 basic helix-loop-helix (bHLH) domain.	myf6	myogenic factor 6	1	1	no	0	0	0	0	0	0	0	0	0	0
EOG090C008K	ENSGACG00000019987	golgin B1	ENSONIG00000000009	golgin B1	golgb1	golgin B1	1	1	no	0	0	0	0	0	0	0	0	0	0
EOG090C079F	ENSGACG00000019990	hematopoietic cell-specific Lyn substrate 1	ENSONIG00000000010	Similarity:Contains 1 SH3 domain.	hcls1	src substrate cortactin	1	1	no	0	0	0	0	0	0	0	0	0	0
EOG090C0G2X	ENSGACG00000019992	LLP homolog, long-term synaptic facilitation (Aplysia)	ENSONIG00000000011	LLP homolog, long-term synaptic facilitation (Aplysia)	llph	LLP homolog, long-term synaptic facilitation factor	1	1	no	0	0	0	0	0	0	0	0	0	0
EOG090C0AMW	ENSGACG00000019993	peroxisomal biogenesis factor 26	ENSONIG00000000012	peroxisomal biogenesis factor 26	pex26	peroxisomal biogenesis factor 26	1	1	no	0	0	0	0	0	0	0	0	0	0
EOG090C0EBV	ENSGACG00000019912	ubiquitin specific peptidase 41	ENSONIG00000000013	Similarity:Contains USP domain.	usp18	ubl carboxyl-terminal hydrolase 18	1	1	no	0	0	0	0	0	0	0	0	0	0
EOG090C0AIP	ENSGACG00000019909	cyclin D2, b	ENSONIG00000000014	Similarity:Belongs to the cyclin family.		G1/S-specific cyclin-D2	1	1	no	0	0	0	0	0	0	0	0	0	0
EOG090C0CB8	ENSGACG00000013805;ENSGACG00000019907	tp53-induced glycolysis and apoptosis regulator a ;tp53-induced glycolysis and apoptosis regulator b	ENSONIG00000000015;ENSONIG00000010281	tp53-induced glycolysis and apoptosis regulator b ;tp53-induced glycolysis and apoptosis regulator a	tigarb;tigara	tp53-induced glycolysis and apoptosis regulator b ;probable fructose-2,6-bisphosphatase TIGAR A	2	2	no	0	0	0	0	0	0	0	0	0	0
EOG090C0CZY	ENSGACG00000019905	fibroblast growth factor 23	ENSONIG00000000016	fibroblast growth factor 23	fgf23	fibroblast growth factor 23	1	1	no	0	0	0	0	0	0	0	0	0	0
EOG090C0D15	ENSGACG00000013812;ENSGACG00000019904	fibroblast growth factor 6b ;fibroblast growth factor 6b	ENSONIG00000000017;ENSONIG00000010280	Fibroblast growth factor;Fibroblast growth factor	FGF6 (1 of many);FGF6 (1 of many)	fibroblast growth factor 6 ;fibroblast growth factor 6	2	2	no	0	0	0	0	0	0	0	0	0	0
EOG090C0438	ENSGACG00000013724;ENSGACG00000019901	polypeptide N-acetylgalactosaminyltransferase 8a, tandem duplicate 2 ;polypeptide N-acetylgalactosaminyltransferase 8b, tandem duplicate 1	ENSONIG00000000018;ENSONIG00000010313;ENSONIG00000012326;ENSONIG00000019469	Similarity:Contains ricin B-type lectin domain.;Similarity:Contains ricin B-type lectin domain.;Similarity:Contains ricin B-type lectin domain.;Similarity:Contains ricin B-type lectin domain.	galnt8b.1;;;	polypeptide N-acetylgalactosaminyltransferase 8b, tandem duplicate 1 ;;probable polypeptide N-acetylgalactosaminyltransferase 8 ;	2	4	no	0	0	0	0	0	0	0	0	0	0
EOG090C01D8	ENSGACG00000002743;ENSGACG00000019736	exportin 1 (CRM1 homolog, yeast) a ;exportin 1	ENSONIG00000000019;ENSONIG00000002969	exportin 1 ;exportin 1 (CRM1 homolog, yeast) a	xpo1a;XPO1	exportin 1 (CRM1 homolog, yeast) a ;exportin 1	2	2	yes	0	1	0	0	0	0	0	0	0	0
EOG090C05NO	ENSGACG00000013714;ENSGACG00000019897	cat eye syndrome chromosome region, candidate 1a ;cat eye syndrome chromosome region, candidate 1b	ENSONIG00000000020;ENSONIG00000010315	cat eye syndrome chromosome region, candidate 1b ;cat eye syndrome chromosome region, candidate 1a	ada2b;ada2a	adenosine deaminase 2-A ;adenosine deaminase 2a	2	2	no	0	0	0	0	0	0	0	0	0	0
EOG090C0E8C	ENSGACG00000019892	ATPase, H+ transporting, lysosomal, V1 subunit E1b	ENSONIG00000000021	ATPase, H+ transporting, lysosomal, V1 subunit E1b	atp6v1e1b	ATPase H+ transporting V1 subunit E1	1	1	no	0	0	0	0	0	0	0	0	0	0
EOG090C0FQT	ENSGACG00000018786	\N	ENSONIG00000000025;ENSONIG00000009716	Transmembrane:Helical;Transmembrane:Helical	;	;low affinity immunoglobulin gamma Fc region receptor II	1	2	no	0	0	0	0	0	0	0	0	0	0
EOG090C0A31	ENSGACG00000001202;ENSGACG00000018003;ENSGACG00000018058;ENSGACG00000018973;ENSGACG00000018974;ENSGACG00000018975;ENSGACG00000018976;ENSGACG00000018977	\N;\N;\N;\N;\N;\N;\N;\N	ENSONIG00000000027;ENSONIG00000011627;ENSONIG00000013606;ENSONIG00000018722;ENSONIG00000020703;ENSONIG00000021012	Uncharacterized protein ;Uncharacterized protein ;Uncharacterized protein ;Uncharacterized protein ;Uncharacterized protein ;Uncharacterized protein	;;;;;	;;;;;	8	6	yes	0	0	0	0	0	0	0	0	1	0
EOG090C0EV4	ENSGACG00000018565	\N	ENSONIG00000000028;ENSONIG00000000032	Transmembrane:Helical;Uncharacterized protein	;	;	1	2	no	0	0	0	0	0	0	0	0	0	0
EOG090C05DW	ENSGACG00000019739	chaperonin containing TCP1, subunit 4 (delta)	ENSONIG00000000029	T-complex protein 1 subunit delta	cct4	chaperonin containing TCP1 subunit 4	1	1	no	0	0	0	0	0	0	0	0	0	0
EOG090C0B2X	ENSGACG00000019889	Spi-C transcription factor (Spi-1/PU.1 related)	ENSONIG00000000031	Similarity:Belongs to the ETS family.	spic	transcription factor Spi-C	1	1	no	0	0	0	0	0	0	0	0	0	0
EOG090C093P	ENSGACG00000018788	transmembrane protein 185	ENSONIG00000000033	Transmembrane:Helical	tmem185	transmembrane protein 185A	1	1	no	0	0	0	0	0	0	0	0	0	0
EOG090C00ZW	ENSGACG00000019879	myosin binding protein C, slow type	ENSONIG00000000034	myosin binding protein C, slow type	mybpc1	myosin binding protein C, slow type	1	1	no	0	0	0	0	0	0	0	0	0	0
EOG090C04TG	ENSGACG00000018793	MUS81 structure-specific endonuclease subunit	ENSONIG00000000035	MUS81 structure-specific endonuclease subunit	mus81	MUS81 structure-specific endonuclease subunit	1	1	no	0	0	0	0	0	0	0	0	0	0
EOG090C058I	ENSGACG00000019749	pseudouridylate synthase 10	ENSONIG00000000036	pseudouridylate synthase 10	pus10	pseudouridine synthase 10	1	1	no	0	0	0	0	0	0	0	0	0	0
EOG090C0CUW	ENSGACG00000018794	ovo-like zinc finger 1	ENSONIG00000000037	ovo-like zinc finger 1	ovol1a	ovo like transcriptional repressor 1	1	1	no	0	0	0	0	0	0	0	0	0	0
EOG090C05Q9	ENSGACG00000010522	v-akt murine thymoma viral oncogene homolog 3b	ENSONIG00000000038;ENSONIG00000000863	Catalytic Activity:ATP + a protein = ADP + a phosphoprotein.;Catalytic Activity:ATP + a protein = ADP + a phosphoprotein.	akt3b;akt3a	RAC-gamma serine/threonine-protein kinase ;v-akt murine thymoma viral oncogene homolog 3a	1	2	no	0	0	0	0	0	0	0	0	0	0
EOG090C07FK	ENSGACG00000018796	cytidine monophosphate N-acetylneuraminic acid synthetase b	ENSONIG00000000039	cytidine monophosphate N-acetylneuraminic acid synthetase b	cmasa	N-acylneuraminate cytidylyltransferase	1	1	yes	0	0	0	0	0	0	1	0	0	0
EOG090C0FWU	ENSGACG00000005075	si:ch73-28h20.1	ENSONIG00000000040	Uncharacterized protein			1	1	no	0	0	0	0	0	0	0	0	0	0
EOG090C0CFY	ENSGACG00000019754	cytokine receptor family member B17	ENSONIG00000000041	Transmembrane:Helical			1	1	no	0	0	0	0	0	0	0	0	0	0
EOG090C08IB	ENSGACG00000019756	LTV1 ribosome biogenesis factor	ENSONIG00000000042	LTV1 ribosome biogenesis factor	ltv1	LTV1 ribosome biogenesis factor	1	1	no	0	0	0	0	0	0	0	0	0	0
EOG090C03L1	ENSGACG00000019761	calpain 9	ENSONIG00000000043	calpain 9	capn9	calpain 9	1	1	yes	0	0	0	0	0	0	0	1	0	0
EOG090C0GQB	ENSGACG00000005417;ENSGACG00000005425;ENSGACG00000005429;ENSGACG00000012473	\N;\N;\N;\N	ENSONIG00000000044;ENSONIG00000000045;ENSONIG00000016359	Uncharacterized protein ;Uncharacterized protein ;Uncharacterized protein	;;	;;hepcidin	4	3	yes	0	0	0	0	0	0	0	0	1	0
EOG090C0B8A	ENSGACG00000005408	R-spondin 2	ENSONIG00000000046	R-spondin 2	rspo2	R-spondin 2	1	1	no	0	0	0	0	0	0	0	0	0	0
EOG090C06ND	ENSGACG00000005380	eukaryotic translation initiation factor 3, subunit E, a	ENSONIG00000000047;ENSONIG00000013822	Eukaryotic translation initiation factor 3 subunit 6;Eukaryotic translation initiation factor 3 subunit 6	eif3ea;eif3eb	eukaryotic translation initiation factor 3 subunit E-A ;eukaryotic translation initiation factor 3 subunit E-B	1	2	no	0	0	0	0	0	0	0	0	0	0
EOG090C08KR	ENSGACG00000019869	choline phosphotransferase 1	ENSONIG00000000048	Similarity:Belongs to the CDP-alcohol phosphatidyltransferase class-I family.	chpt1	choline phosphotransferase 1	1	1	no	0	0	0	0	0	0	0	0	0	0
EOG090C09ZB	ENSGACG00000005305	ER membrane protein complex subunit 2	ENSONIG00000000049	ER membrane protein complex subunit 2	emc2	ER membrane protein complex subunit 2	1	1	no	0	0	0	0	0	0	0	0	0	0
EOG090C011J	ENSGACG00000019866	N-acetylglucosamine-1-phosphate transferase, alpha and beta subunits	ENSONIG00000000050	Transmembrane:Helical	gnptab	N-acetylglucosamine-1-phosphate transferase subunits alpha and beta	1	1	no	0	0	0	0	0	0	0	0	0	0
EOG090C098T	ENSGACG00000002573;ENSGACG00000005298	thyrotropin-releasing hormone receptor b ;thyrotropin-releasing hormone receptor a	ENSONIG00000000051;ENSONIG00000013829	Similarity:Belongs to the G-protein coupled receptor 1 family.;Similarity:Belongs to the G-protein coupled receptor 1 family.	trhra;trhrb	thyrotropin-releasing hormone receptor ;thyrotropin-releasing hormone receptor	2	2	no	0	0	0	0	0	0	0	0	0	0
EOG090C07XD	ENSGACG00000005279	growth differentiation factor 6a	ENSONIG00000000052	Similarity:Belongs to the TGF-beta family.	gdf6a	growth/differentiation factor 6-A	1	1	no	0	0	0	0	0	0	0	0	0	0
EOG090C0EOC	ENSGACG00000019865	coiled-coil domain containing 53	ENSONIG00000000054	coiled-coil domain containing 53	washc3	WASH complex subunit 3	1	1	no	0	0	0	0	0	0	0	0	0	0
EOG090C043P	ENSGACG00000005263	syntabulin (syntaxin-interacting)	ENSONIG00000000055	syntabulin (syntaxin-interacting)	sybu	syntabulin (syntaxin-interacting)	1	1	no	0	0	0	0	0	0	0	0	0	0
EOG090C0DNS	ENSGACG00000005248	estrogen receptor binding site associated, antigen, 9	ENSONIG00000000056	estrogen receptor binding site associated, antigen, 9	ebag9	estrogen receptor binding site associated, antigen, 9	1	1	no	0	0	0	0	0	0	0	0	0	0
EOG090C01OA	ENSGACG00000019863	\N	ENSONIG00000000057	TERF1-interacting nuclear factor 2, N-terminal domain			1	1	no	0	0	0	0	0	0	0	0	0	0
EOG090C05IP	ENSGACG00000019860	differentially expressed in FDCP 6c homolog	ENSONIG00000000058	Similarity:Contains 1 PH domain.	def6c	differentially expressed in FDCP 6 homolog	1	1	no	0	0	0	0	0	0	0	0	0	0
EOG090C0255	ENSGACG00000005223	ttk protein kinase	ENSONIG00000000059	ttk protein kinase	ttk	TTK protein kinase	1	1	yes	0	1	0	0	0	0	0	0	0	0
EOG090C043E	ENSGACG00000002963	asteroid homolog 1 (Drosophila)	ENSONIG00000000060	asteroid homolog 1 (Drosophila)			1	1	no	0	0	0	0	0	0	0	0	0	0
EOG090C04X4	ENSGACG00000019769	TAF5-like RNA polymerase II, p300/CBP-associated factor (PCAF)-associated factor	ENSONIG00000000061	TAF5-like RNA polymerase II, p300/CBP-associated factor (PCAF)-associated factor	taf5l	TATA-box binding protein associated factor 5 like	1	1	no	0	0	0	0	0	0	0	0	0	0
EOG090C08BK	ENSGACG00000005192	branched chain keto acid dehydrogenase E1, beta polypeptide	ENSONIG00000000062	branched chain keto acid dehydrogenase E1, beta polypeptide	bckdhb	branched chain keto acid dehydrogenase E1 subunit beta	1	1	no	0	0	0	0	0	0	0	0	0	0
EOG090C01EF	ENSGACG00000019771	nucleoporin 133	ENSONIG00000000063	nucleoporin 133	nup133	nucleoporin 133	1	1	no	0	0	0	0	0	0	0	0	0	0
EOG090C07ZU	ENSGACG00000005186	family with sequence similarity 46, member A	ENSONIG00000000064	family with sequence similarity 46, member A	TENT5A	terminal nucleotidyltransferase 5A	1	1	no	0	0	0	0	0	0	0	0	0	0
EOG090C010Y	ENSGACG00000005178	inhibitor of Bruton agammaglobulinemia tyrosine kinase	ENSONIG00000000065	Similarity:Contains 2 ANK repeats.	ibtk	inhibitor of Bruton agammaglobulinemia tyrosine kinase	1	1	no	0	0	0	0	0	0	0	0	0	0
EOG090C082G	ENSGACG00000006109;ENSGACG00000007661;ENSGACG00000010421;ENSGACG00000016168	actin, alpha, cardiac muscle 1a ;\N;\N;\N	ENSONIG00000000066;ENSONIG00000001389;ENSONIG00000005683;ENSONIG00000012129;ENSONIG00000017072;ENSONIG00000019130	Similarity:Belongs to the actin family.;Similarity:Belongs to the actin family.;Similarity:Belongs to the actin family.;Similarity:Belongs to the actin family.;Similarity:Belongs to the actin family.;Similarity:Belongs to the actin family.	acta1a;zgc:86709;;;acta1b;acta2	actin, alpha cardiac ;zgc:86709 ;actin, alpha cardiac ;actin, alpha cardiac ;actin, alpha skeletal muscle A ;actin, alpha 2, smooth muscle, aorta	4	6	yes	0	0	0	0	1	0	1	0	0	0
EOG090C04TK	ENSGACG00000016808	Rho guanine nucleotide exchange factor (GEF) 37	ENSONIG00000000067	Rho guanine nucleotide exchange factor (GEF) 37	arhgef37	Rho guanine nucleotide exchange factor 37	1	1	no	0	0	0	0	0	0	0	0	0	0
EOG090C08QE	ENSGACG00000001026	cell division cycle 6 homolog (S. cerevisiae)	ENSONIG00000000068	cell division cycle 6 homolog (S. cerevisiae)	cdc6	cell division cycle 6	1	1	no	0	0	0	0	0	0	0	0	0	0
EOG090C00XK	ENSGACG00000000026;ENSGACG00000000050;ENSGACG00000000051;ENSGACG00000000132;ENSGACG00000000157;ENSGACG00000000179;ENSGACG00000000187;ENSGACG00000000221;ENSGACG00000000287;ENSGACG00000000322;ENSGACG00000000386;ENSGACG00000000403;ENSGACG00000000530;ENSGACG00000000677;ENSGACG00000000767;ENSGACG00000000842;ENSGACG00000000886;ENSGACG00000000931;ENSGACG00000000942;ENSGACG00000000943;ENSGACG00000000964;…	\N;\N;\N;\N;\N;\N;\N;\N;\N;\N;\N;\N;\N;\N;\N;\N;\N;\N;\N;\N;\N;\N;\N;\N;\N;\N;\N;\N;\N;\N;\N;\N;\N;\N;\N;\N;\N;\N;\N;\N;\N;\N;\N;\N;\N;\N;\N;\N;\N;\N;\N;\N;\N;\N;\N;\N;\N;\N;\N;\N	ENSONIG00000000069;ENSONIG00000000336;ENSONIG00000000338;ENSONIG00000003580;ENSONIG00000003581;ENSONIG00000003583;ENSONIG00000003983;ENSONIG00000003985;ENSONIG00000003994;ENSONIG00000004095;ENSONIG00000004284;ENSONIG00000004480;ENSONIG00000004621;ENSONIG00000006320;ENSONIG00000006389;ENSONIG00000006403;ENSONIG00000006672;ENSONIG00000006940;ENSONIG00000007251;ENSONIG00000007327;ENSONIG00000007406;…	Uncharacterized protein ;Similarity:Contains B30.2/SPRY domain.;Similarity:Contains B30.2/SPRY domain.;Similarity:Contains B30.2/SPRY domain.;Similarity:Contains B30.2/SPRY domain.;Similarity:Contains B30.2/SPRY domain.;Similarity:Contains B30.2/SPRY domain.;Similarity:Contains B30.2/SPRY domain.;Similarity:Contains B30.2/SPRY domain.;Similarity:Contains B30.2/SPRY domain.;Similarity:Contains B30…	;;;;;;;;;;;;;;;;;;;;;;;;;;;;;;;;;;;;;;;;;;;;;;;;;;;;;;;;;;;;;;;;;;;;;;;;;;;	;;;;;;;;;;;;;;;;;;NLR family CARD domain-containing protein 3 ;;;;;;;;;;;;;;;;;;;;;;;NLR family CARD domain-containing protein 3 ;;;;;;;;;;;;;;;;;;;;;;;;;;;;;;;;;;	60	76	yes	1	0	0	0	2	1	0	2	0	0
EOG090C0145	ENSGACG00000016234	polymerase (RNA) II (DNA directed) polypeptide B	ENSONIG00000000070	DNA-directed RNA polymerase	polr2b	RNA polymerase II subunit B	1	1	no	0	0	0	0	0	0	0	0	0	0
EOG090C0CTW	ENSGACG00000005169	ubiquitin protein ligase E3D	ENSONIG00000000071	ubiquitin protein ligase E3D	ube3d	ubiquitin protein ligase E3D	1	1	no	0	0	0	0	0	0	0	0	0	0
EOG090C006T	ENSGACG00000005136	dopey family member 1	ENSONIG00000000072	dopey family member 1	dop1a	DOP1 leucine zipper like protein A	1	1	no	0	0	0	0	0	0	0	0	0	0
EOG090C0F7S	ENSGACG00000019779	WAS/WASL interacting protein family, member 2a	ENSONIG00000000073	WAS/WASL interacting protein family, member 2a	wipf2a	WAS/WASL interacting protein family, member 2a	1	1	no	0	0	0	0	0	0	0	0	0	0
EOG090C0BW8	ENSGACG00000016231	insulin-like growth factor binding protein 7	ENSONIG00000000074	Similarity:Contains IGFBP N-terminal domain.	igfbp7	insulin like growth factor binding protein 7	1	1	no	0	0	0	0	0	0	0	0	0	0
EOG090C04C2	ENSGACG00000020037	cryptochrome circadian clock 1aa	ENSONIG00000000075	cryptochrome circadian clock 1aa	CRY1 (1 of many)	cryptochrome-1	1	1	no	0	0	0	0	0	0	0	0	0	0
EOG090C04WY	ENSGACG00000020031	synaptotagmin X	ENSONIG00000000076	Similarity:Contains 2 C2 domains.	syt10	synaptotagmin 10	1	1	no	0	0	0	0	0	0	0	0	0	0
EOG090C0E0H	ENSGACG00000020007	lin-7 homolog A (C. elegans)	ENSONIG00000000078	Similarity:Contains 1 PDZ (DHR) domain.	lin7a	lin-7 homolog A (C. elegans)	1	1	no	0	0	0	0	0	0	0	0	0	0
EOG090C03W3	ENSGACG00000019999	acyl-CoA synthetase short-chain family member 3	ENSONIG00000000079	acyl-CoA synthetase short-chain family member 3	acss3	acyl-CoA synthetase short chain family member 3	1	1	no	0	0	0	0	0	0	0	0	0	0
EOG090C018H	ENSGACG00000019995	protein tyrosine phosphatase, receptor type, f polypeptide (PTPRF), interacting protein (liprin), alpha 2	ENSONIG00000000080	protein tyrosine phosphatase, receptor type, f polypeptide (PTPRF), interacting protein (liprin), alpha 2	ppfia2	protein tyrosine phosphatase, receptor type, f polypeptide (PTPRF), interacting protein (liprin), alpha 2	1	1	yes	0	0	0	0	0	0	0	1	0	0
EOG090C06UV	ENSGACG00000019914	si:ch73-352p4.8	ENSONIG00000000081;ENSONIG00000016396	Transmembrane:Helical;Transmembrane:Helical	si:ch73-352p4.8;	cystine/glutamate transporter ;	1	2	no	0	0	0	0	0	0	0	0	0	0
EOG090C04CV	ENSGACG00000019929	forkhead box M1	ENSONIG00000000082;ENSONIG00000017103	forkhead box M1 ;forkhead box M1	;	;	1	2	no	0	0	0	0	0	0	0	0	0	0
EOG090C07R4	ENSGACG00000019934	tubby like protein 3	ENSONIG00000000084	Tubby-like protein	zmp:0000000711	zmp:0000000711	1	1	no	0	0	0	0	0	0	0	0	0	0
EOG090C06NW	ENSGACG00000019938	tripartite motif containing 35	ENSONIG00000000085	Similarity:Contains B30.2/SPRY domain.			1	1	no	0	0	0	0	0	0	0	0	0	0
EOG090C0FQR	ENSGACG00000019945	pleiotrophin	ENSONIG00000000086	pleiotrophin	ptn	pleiotrophin	1	1	no	0	0	0	0	0	0	0	0	0	0
EOG090C0FWW	ENSGACG00000019949	myotrophin	ENSONIG00000000087	Similarity:Contains 2 ANK repeats.	mtpn	myotrophin	1	1	no	0	0	0	0	0	0	0	0	0	0
EOG090C0EU2	ENSGACG00000019955	family with sequence similarity 180, member A	ENSONIG00000000088	family with sequence similarity 180, member A		protein FAM180A	1	1	no	0	0	0	0	0	0	0	0	0	0
EOG090C02MZ	ENSGACG00000019956	sema domain, immunoglobulin domain (Ig), short basic domain, secreted, (semaphorin) 3C	ENSONIG00000000089	Similarity:Contains Sema domain.	sema3c	sema domain, immunoglobulin domain (Ig), short basic domain, secreted, (semaphorin) 3C	1	1	no	0	0	0	0	0	0	0	0	0	0
EOG090C07KH	ENSGACG00000019957	CD36 molecule (thrombospondin receptor)	ENSONIG00000000090	Transmembrane:Helical	cd36	CD36 molecule	1	1	no	0	0	0	0	0	0	0	0	0	0
EOG090C08SL	ENSGACG00000019962	\N	ENSONIG00000000091	G-protein alpha subunit, group I		guanine nucleotide-binding protein G(i) subunit alpha-1	1	1	no	0	0	0	0	0	0	0	0	0	0
EOG090C00QL	ENSGACG00000011944;ENSGACG00000019967	membrane associated guanylate kinase, WW and PDZ domain containing 2b ;membrane associated guanylate kinase, WW and PDZ domain containing 2a	ENSONIG00000000092;ENSONIG00000014787	Similarity:Contains 5 PDZ (DHR) domains.;Similarity:Contains 6 PDZ (DHR) domains.	magi2a;magi2b	membrane associated guanylate kinase, WW and PDZ domain containing 2a ;membrane associated guanylate kinase, WW and PDZ domain containing 2b	2	2	no	0	0	0	0	0	0	0	0	0	0
EOG090C04NR	ENSGACG00000019970	fatty acyl CoA reductase 2	ENSONIG00000000094	Transmembrane:Helical	si:dkey-97m3.1	fatty acyl-CoA reductase 1	1	1	no	0	0	0	0	0	0	0	0	0	0
EOG090C09GR	ENSGACG00000011958;ENSGACG00000019973	ERGIC and golgi 2 ;ERGIC and golgi 2	ENSONIG00000000095;ENSONIG00000014792	Transmembrane:Helical;Transmembrane:Helical	si:ch211-225b10.3;ergic2	endoplasmic reticulum-Golgi intermediate compartment protein 2 ;ERGIC and golgi 2	2	2	no	0	0	0	0	0	0	0	0	0	0
EOG090C04UN	ENSGACG00000019975	lysine (K)-specific demethylase 7Aa	ENSONIG00000000096	Similarity:Contains JmjC domain.	KDM7A	lysine demethylase 7A	1	1	no	0	0	0	0	0	0	0	0	0	0
EOG090C00RH	ENSGACG00000019979	lysine (K)-specific methyltransferase 2E	ENSONIG00000000097	Similarity:Contains 1 SET domain.	kmt2e	lysine (K)-specific methyltransferase 2E	1	1	no	0	0	0	0	0	0	0	0	0	0
EOG090C0C9N	ENSGACG00000019981	lipoma HMGIC fusion partner-like 3	ENSONIG00000000098	Transmembrane:Helical	lhfpl3	LHFPL tetraspan subfamily member 3	1	1	no	0	0	0	0	0	0	0	0	0	0
EOG090C08JF	ENSGACG00000019984	origin recognition complex, subunit 5	ENSONIG00000000099	origin recognition complex, subunit 5	orc5	origin recognition complex subunit 5	1	1	no	0	0	0	0	0	0	0	0	0	0
EOG090C0CJ6	ENSGACG00000016224	COX18 cytochrome c oxidase assembly factor	ENSONIG00000000100	Similarity:Belongs to the OXA1/ALB3/YidC family.	cox18	cytochrome c oxidase assembly factor COX18	1	1	no	0	0	0	0	0	0	0	0	0	0
EOG090C0D7W	ENSGACG00000016220	selenoprotein T, 2	ENSONIG00000000101	Selenoprotein T	selenot2	selenoprotein T, 2	1	1	no	0	0	0	0	0	0	0	0	0	0
EOG090C01YP	ENSGACG00000000645	aminopeptidase puromycin sensitive	ENSONIG00000000102	aminopeptidase puromycin sensitive	npepps	aminopeptidase puromycin sensitive	1	1	no	0	0	0	0	0	0	0	0	0	0
EOG090C08IU	ENSGACG00000016271	sequestosome 1	ENSONIG00000000103	Similarity:Contains PB1 domain.	sqstm1	sequestosome 1	1	1	no	0	0	0	0	0	0	0	0	0	0
EOG090C057R	ENSGACG00000005122	synaptosomal-associated protein 91	ENSONIG00000000104	synaptosomal-associated protein 91	snap91	synaptosomal-associated protein 91	1	1	no	0	0	0	0	0	0	0	0	0	0
EOG090C01RE	ENSGACG00000016277	TBC1 domain family, member 9B (with GRAM domain)	ENSONIG00000000105	TBC1 domain family, member 9B (with GRAM domain)	tbc1d9	TBC1 domain family member 9B	1	1	no	0	0	0	0	0	0	0	0	0	0
EOG090C04SW	ENSGACG00000005040	malic enzyme 1, NADP(+)-dependent, cytosolic	ENSONIG00000000106	Malic enzyme	me1	malic enzyme 1, NADP(+)-dependent, cytosolic	1	1	yes	0	0	0	0	0	1	0	0	0	0
EOG090C0ACS	ENSGACG00000000656	mitochondrial ribosomal protein L45	ENSONIG00000000107	mitochondrial ribosomal protein L45	mrpl45	mitochondrial ribosomal protein L45	1	1	no	0	0	0	0	0	0	0	0	0	0
EOG090C0809	ENSGACG00000016279	ring finger protein 130	ENSONIG00000000108	Transmembrane:Helical	rnf130	ring finger protein 130	1	1	no	0	0	0	0	0	0	0	0	0	0
EOG090C09R6	ENSGACG00000016282	coagulation factor II (thrombin) receptor-like 3	ENSONIG00000000110	Similarity:Belongs to the G-protein coupled receptor 1 family.	si:ch211-132p1.2	F2R like thrombin or trypsin receptor 3	1	1	no	0	0	0	0	0	0	0	0	0	0
EOG090C00H2	ENSGACG00000016344	ArfGAP with RhoGAP domain, ankyrin repeat and PH domain 3	ENSONIG00000000111	Similarity:Contains 5 PH domains.	arap3	ArfGAP with RhoGAP domain, ankyrin repeat and PH domain 3	1	1	no	0	0	0	0	0	0	0	0	0	0
EOG090C03QZ	ENSGACG00000005032	PR domain containing 13	ENSONIG00000000112	Similarity:Contains 1 SET domain.	prdm13	PR/SET domain 13	1	1	no	0	0	0	0	0	0	0	0	0	0
EOG090C07ZF	ENSGACG00000005025	zgc:172323	ENSONIG00000000113	zgc:172323	zgc:172323	glial fibrillary acidic protein	1	1	no	0	0	0	0	0	0	0	0	0	0
EOG090C0E6L	ENSGACG00000005018	si:dkey-165n16.1	ENSONIG00000000115	si:dkey-165n16.1		thiosulfate sulfurtransferase like domain containing 3	1	1	no	0	0	0	0	0	0	0	0	0	0
EOG090C02Y6	ENSGACG00000005006	ubiquitin specific peptidase 45	ENSONIG00000000116	Catalytic Activity:Thiol-dependent hydrolysis of ester, thioester, amide, peptide and isopeptide bonds formed by the C-terminal Gly of ubiquitin (a 76-residue protein attached to proteins as an intracellular targeting signal).	usp45	ubiquitin specific peptidase 45	1	1	no	0	0	0	0	0	0	0	0	0	0
EOG090C05VN	ENSGACG00000019811	sp2 transcription factor	ENSONIG00000000117	sp2 transcription factor	sp2	Sp2 transcription factor	1	1	no	0	0	0	0	0	0	0	0	0	0
EOG090C0BBL	ENSGACG00000016341	si:dkeyp-110e4.11	ENSONIG00000000118	Similarity:Contains START domain.	stard15	StAR-related lipid transfer (START) domain containing 15	1	1	no	0	0	0	0	0	0	0	0	0	0
EOG090C00O2	ENSGACG00000019810	ATP-binding cassette, sub-family C (CFTR/MRP), member 10	ENSONIG00000000119	Similarity:Belongs to the ABC transporter superfamily.	abcc10	ATP-binding cassette, sub-family C (CFTR/MRP), member 10	1	1	no	0	0	0	0	0	0	0	0	0	0
EOG090C09VY	ENSGACG00000004989	PNN-interacting serine/arginine-rich protein	ENSONIG00000000120	PNN-interacting serine/arginine-rich protein	pnisr	PNN interacting serine and arginine rich protein	1	1	no	0	0	0	0	0	0	0	0	0	0
EOG090C0A6S	ENSGACG00000002316	family with sequence similarity 98, member A	ENSONIG00000000121;ENSONIG00000004842;ENSONIG00000010957	family with sequence similarity 98, member A ;family with sequence similarity 98, member A ;family with sequence similarity 98, member A	fam98a (1 of many);;fam98a (1 of many)	family with sequence similarity 98 member A ;;family with sequence similarity 98 member A	1	3	no	0	0	0	0	0	0	0	0	0	0
EOG090C093E	ENSGACG00000004983	coenzyme Q3 methyltransferase	ENSONIG00000000124	coenzyme Q3 methyltransferase	coq3	coenzyme Q3 methyltransferase	1	1	no	0	0	0	0	0	0	0	0	0	0
EOG090C082P	ENSGACG00000004979;ENSGACG00000013342	failed axon connections homolog b ;failed axon connections homolog a	ENSONIG00000000125;ENSONIG00000000628	failed axon connections homolog b ;failed axon connections homolog a	faxcb;faxca	failed axon connections homolog ;failed axon connections homolog	2	2	no	0	0	0	0	0	0	0	0	0	0
EOG090C049D	ENSGACG00000004972	F-box and leucine-rich repeat protein 4	ENSONIG00000000127	Similarity:Contains 1 F-box domain.	fbxl4	F-box and leucine rich repeat protein 4	1	1	no	0	0	0	0	0	0	0	0	0	0
EOG090C01LF	ENSGACG00000004958	MMS22-like, DNA repair protein	ENSONIG00000000128	MMS22-like, DNA repair protein	mms22l	MMS22 like, DNA repair protein	1	1	yes	0	0	0	0	0	0	0	0	0	1
EOG090C0436	ENSGACG00000004946	kelch-like family member 32	ENSONIG00000000130	Similarity:Contains 1 BTB (POZ) domain.	klhl32	kelch like family member 32	1	1	no	0	0	0	0	0	0	0	0	0	0
EOG090C09WO	ENSGACG00000019523	\N	ENSONIG00000000131;ENSONIG00000000133;ENSONIG00000004512;ENSONIG00000004513;ENSONIG00000014656	Uncharacterized protein ;Uncharacterized protein ;Uncharacterized protein ;Uncharacterized protein ;\N	;;;;	;;;;	1	5	no	0	0	0	0	0	0	0	0	0	0
EOG090C00E4	ENSGACG00000019516	general transcription factor IIIC, polypeptide 1, alpha 220kDa	ENSONIG00000000134	general transcription factor IIIC, polypeptide 1, alpha 220kDa	GTF3C1	general transcription factor IIIC subunit 1	1	1	no	0	0	0	0	0	0	0	0	0	0
EOG090C04G9	ENSGACG00000004932	frizzled class receptor 6	ENSONIG00000000135	Similarity:Contains FZ (frizzled) domain.	fzd6	frizzled class receptor 6	1	1	no	0	0	0	0	0	0	0	0	0	0
EOG090C0AWN	ENSGACG00000019808	mitochondrial ribosomal protein L4	ENSONIG00000000136	mitochondrial ribosomal protein L4	mrpl4	mitochondrial ribosomal protein L4	1	1	no	0	0	0	0	0	0	0	0	0	0
EOG090C0D2U	ENSGACG00000004928	collagen triple helix repeat containing 1b	ENSONIG00000000137	collagen triple helix repeat containing 1b	cthrc1b	collagen triple helix repeat containing 1b	1	1	no	0	0	0	0	0	0	0	0	0	0
EOG090C09FH	ENSGACG00000004881	solute carrier family 25 (mitochondrial folate carrier), member 32b	ENSONIG00000000139	Similarity:Belongs to the mitochondrial carrier (TC 2.A.29) family.	slc25a32b	solute carrier family 25 (mitochondrial folate carrier), member 32b	1	1	no	0	0	0	0	0	0	0	0	0	0
EOG090C08JG	ENSGACG00000019798	collagen, type IX, alpha 1a	ENSONIG00000000141	collagen, type IX, alpha 1a	col9a1a	collagen, type IX, alpha 1a	1	1	yes	0	0	0	0	0	0	1	0	0	0
EOG090C06XU	ENSGACG00000004840	ddb1 and cul4 associated factor 13	ENSONIG00000000142	ddb1 and cul4 associated factor 13	dcaf13	DDB1 and CUL4 associated factor 13	1	1	no	0	0	0	0	0	0	0	0	0	0
EOG090C00OF	ENSGACG00000004824	regulating synaptic membrane exocytosis 2a	ENSONIG00000000143	Similarity:Contains 2 C2 domains.	RIMS2	regulating synaptic membrane exocytosis 2	1	1	no	0	0	0	0	0	0	0	0	0	0
EOG090C0498	ENSGACG00000019513	axin 1	ENSONIG00000000144	Similarity:Contains 1 RGS domain.		axin-1	1	1	no	0	0	0	0	0	0	0	0	0	0
EOG090C004I	ENSGACG00000016748	Dmx-like 2	ENSONIG00000000145	Dmx-like 2	dmxl2	Dmx like 2	1	1	yes	0	0	0	0	0	0	0	0	1	0
EOG090C0C2R	ENSGACG00000019511	THUMP domain containing 1	ENSONIG00000000146	THUMP domain containing 1	thumpd1	THUMP domain containing 1	1	1	no	0	0	0	0	0	0	0	0	0	0
EOG090C041F	ENSGACG00000019510	ERI1 exoribonuclease family member 2	ENSONIG00000000147	ERI1 exoribonuclease family member 2	ERI2	ERI1 exoribonuclease family member 2	1	1	no	0	0	0	0	0	0	0	0	0	0
EOG090C02LL	ENSGACG00000019507	\N	ENSONIG00000000148	Uncharacterized protein	REXO5	RNA exonuclease 5	1	1	no	0	0	0	0	0	0	0	0	0	0
EOG090C04CM	ENSGACG00000004814	dendrocyte expressed seven transmembrane protein	ENSONIG00000000149	Transmembrane:Helical	DCSTAMP	dendrocyte expressed seven transmembrane protein	1	1	no	0	0	0	0	0	0	0	0	0	0
EOG090C05HL	ENSGACG00000004785	dihydropyrimidinase	ENSONIG00000000150	dihydropyrimidinase	dpys	dihydropyrimidinase	1	1	no	0	0	0	0	0	0	0	0	0	0
EOG090C046Z	ENSGACG00000019501	poly(A)-specific ribonuclease (deadenylation nuclease)	ENSONIG00000000151	poly(A)-specific ribonuclease (deadenylation nuclease)	parn	poly(A)-specific ribonuclease	1	1	no	0	0	0	0	0	0	0	0	0	0
EOG090C017Y	ENSGACG00000004783	zinc finger protein, FOG family member 2a	ENSONIG00000000152	zinc finger protein, FOG family member 2a	zfpm2a	zinc finger protein, FOG family member 2a	1	1	no	0	0	0	0	0	0	0	0	0	0
EOG090C082J	ENSGACG00000016746	gliomedin	ENSONIG00000000153	Similarity:Contains olfactomedin-like domain.	gldn	gliomedin	1	1	yes	0	0	0	0	0	0	1	0	0	0
EOG090C031V	ENSGACG00000004766	oxidation resistance 1b	ENSONIG00000000154	oxidation resistance 1b	oxr1b	oxidation resistance 1b	1	1	no	0	0	0	0	0	0	0	0	0	0
EOG090C06E5	ENSGACG00000005982;ENSGACG00000016742	cytochrome P450, family 19, subfamily A, polypeptide 1 ;cytochrome P450, family 19, subfamily A, polypeptide 1a	ENSONIG00000000155;ENSONIG00000008307	Similarity:Belongs to the cytochrome P450 family.;Similarity:Belongs to the cytochrome P450 family.	cyp19a1a;CYP19A1 (1 of many)	Oreochromis niloticus cytochrome P450 19A1-like (LOC100708217), mRNA. ;brain aromatase	2	2	no	0	0	0	0	0	0	0	0	0	0
EOG090C0E4G	ENSGACG00000019788	protein tyrosine phosphatase type IVA, member 1	ENSONIG00000000156	protein tyrosine phosphatase type IVA, member 1	ptp4a1	protein tyrosine phosphatase type IVA, member 1	1	1	no	0	0	0	0	0	0	0	0	0	0
EOG090C03TD	ENSGACG00000019786	lengsin, lens protein with glutamine synthetase domain	ENSONIG00000000157	Similarity:Belongs to the glutamine synthetase family.	lgsn	lengsin, lens protein with glutamine synthetase domain	1	1	no	0	0	0	0	0	0	0	0	0	0
EOG090C00NR	ENSGACG00000016045;ENSGACG00000019784	myomesin 2 ;myomesin 2	ENSONIG00000000159;ENSONIG00000005516	myomesin 2 ;myomesin 2	myom2a;	myomesin 2a ;	2	2	no	0	0	0	0	0	0	0	0	0	0
EOG090C02RC	ENSGACG00000016502	extracellular leucine-rich repeat and fibronectin type III domain containing 1b	ENSONIG00000000160	Transmembrane:Helical		protein ELFN1	1	1	yes	0	0	0	0	0	0	0	0	1	0
EOG090C064V	ENSGACG00000004743	squalene epoxidase a	ENSONIG00000000161	Transmembrane:Helical	sqlea	squalene epoxidase a	1	1	no	0	0	0	0	0	0	0	0	0	0
EOG090C04KE	ENSGACG00000016504	MAD1 mitotic arrest deficient-like 1	ENSONIG00000000162	MAD1 mitotic arrest deficient-like 1	mad1l1	mitotic arrest deficient 1 like 1	1	1	no	0	0	0	0	0	0	0	0	0	0
EOG090C0BUC	ENSGACG00000004550	ring finger protein 144B	ENSONIG00000000163	Transmembrane:Helical	rnf144b	ring finger protein 144B	1	1	no	0	0	0	0	0	0	0	0	0	0
EOG090C042Z	ENSGACG00000004577;ENSGACG00000005147	spire-type actin nucleation factor 1 ;spire-type actin nucleation factor 1a	ENSONIG00000000165;ENSONIG00000002465	spire-type actin nucleation factor 1 ;spire-type actin nucleation factor 1a	spire1b;spire1a	spire-type actin nucleation factor 1b ;spire-type actin nucleation factor 1a	2	2	no	0	0	0	0	0	0	0	0	0	0
EOG090C0E4I	ENSGACG00000016741	tumor necrosis factor, alpha-induced protein 8-like 3	ENSONIG00000000166	tumor necrosis factor, alpha-induced protein 8-like 3	tnfaip8l3	TNF alpha induced protein 8 like 3	1	1	no	0	0	0	0	0	0	0	0	0	0
EOG090C07AZ	ENSGACG00000014981	secretogranin III	ENSONIG00000000167	secretogranin III	scg3	secretogranin III	1	1	no	0	0	0	0	0	0	0	0	0	0
EOG090C0BZB	ENSGACG00000016506	\N	ENSONIG00000000168	Similarity:Belongs to the G-protein coupled receptor 1 family.			1	1	no	0	0	0	0	0	0	0	0	0	0
EOG090C06AQ	ENSGACG00000014138;ENSGACG00000016508	tweety family member 3a ;tweety family member 3b	ENSONIG00000000171;ENSONIG00000001309	Protein tweety homolog;Protein tweety homolog	ttyh3b;ttyh3a	protein tweety homolog 3 ;tweety family member 3	2	2	yes	0	0	0	0	0	1	0	0	0	0
EOG090C0EOL	ENSGACG00000014985	LysM, putative peptidoglycan-binding, domain containing 2	ENSONIG00000000172	LysM, putative peptidoglycan-binding, domain containing 2	lysmd2	LysM domain containing 2	1	1	no	0	0	0	0	0	0	0	0	0	0
EOG090C05A4	ENSGACG00000018668	\N	ENSONIG00000000173;ENSONIG00000014117	Uncharacterized protein ;Uncharacterized protein	;	;	1	2	yes	0	0	0	0	1	1	1	1	1	1
EOG090C09IH	ENSGACG00000014989	tropomodulin 2	ENSONIG00000000174	tropomodulin 2	tmod2	tropomodulin 3	1	1	no	0	0	0	0	0	0	0	0	0	0
EOG090C04FA	ENSGACG00000016515	IQ motif containing E	ENSONIG00000000175	IQ motif containing E		IQ motif containing E	1	1	no	0	0	0	0	0	0	0	0	0	0
EOG090C06QW	ENSGACG00000014999	LEO1 homolog, Paf1/RNA polymerase II complex component	ENSONIG00000000176	LEO1 homolog, Paf1/RNA polymerase II complex component	leo1	LEO1 homolog, Paf1/RNA polymerase II complex component	1	1	no	0	0	0	0	0	0	0	0	0	0
EOG090C0657	ENSGACG00000016520	fascin actin-bundling protein 1b	ENSONIG00000000177	Fascin	fscn1b	fascin	1	1	no	0	0	0	0	0	0	0	0	0	0
EOG090C04KC	ENSGACG00000016526	polo-like kinase 1 (Drosophila)	ENSONIG00000000179	Polo-like kinase	plk1	polo like kinase 1	1	1	no	0	0	0	0	0	0	0	0	0	0
EOG090C02WX	ENSGACG00000015004	mitogen-activated protein kinase 6	ENSONIG00000000180	mitogen-activated protein kinase 6	mapk6	mitogen-activated protein kinase 6	1	1	yes	0	1	0	0	0	0	0	0	0	0
EOG090C055G	ENSGACG00000016787	T-box 5a	ENSONIG00000000182	Similarity:Contains T-box DNA-binding domain.	tbx5a	T-box 5a	1	1	no	0	0	0	0	0	0	0	0	0	0
EOG090C0308	ENSGACG00000015008	ubiquitin specific peptidase 50	ENSONIG00000000183	Similarity:Contains USP domain.		ubiquitin specific peptidase 50	1	1	no	0	0	0	0	0	0	0	0	0	0
EOG090C02XL	ENSGACG00000015010	ubiquitin specific peptidase 8	ENSONIG00000000185	Similarity:Contains USP domain.	usp8	ubiquitin specific peptidase 8	1	1	no	0	0	0	0	0	0	0	0	0	0
EOG090C0243	ENSGACG00000016084;ENSGACG00000019782	hexokinase 1 ;hexokinase 1	ENSONIG00000000186;ENSONIG00000017024	Hexokinase;Hexokinase	HK1 (1 of many);HK1 (1 of many)	hexokinase 1 ;hexokinase 1	2	2	yes	0	0	0	0	0	1	0	0	1	0
EOG090C03NB	ENSGACG00000016783	T-box 3a	ENSONIG00000000187	Similarity:Contains T-box DNA-binding domain.	tbx3a	T-box 3	1	1	no	0	0	0	0	0	0	0	0	0	0
EOG090C012G	ENSGACG00000009896;ENSGACG00000016535	collagen, type V, alpha 3a ;collagen, type V, alpha 3b	ENSONIG00000000188;ENSONIG00000001614	collagen, type V, alpha 3b ;collagen, type V, alpha 3a	col5a3b;col5a3a	collagen type V alpha 3 chain ;collagen, type V, alpha 3a	2	2	no	0	0	0	0	0	0	0	0	0	0
EOG090C00AU	ENSGACG00000016778	mediator complex subunit 13-like	ENSONIG00000000189	mediator complex subunit 13-like	MED13L	mediator complex subunit 13 like	1	1	no	0	0	0	0	0	0	0	0	0	0
EOG090C03F4	ENSGACG00000015018	histidine decarboxylase	ENSONIG00000000190	Similarity:Belongs to the group II decarboxylase family.	hdc	histidine decarboxylase	1	1	no	0	0	0	0	0	0	0	0	0	0
EOG090C04JJ	ENSGACG00000015025	solute carrier family 27 (fatty acid transporter), member 2	ENSONIG00000000192;ENSONIG00000012093	solute carrier family 27 (fatty acid transporter), member 2 ;solute carrier family 27 (fatty acid transporter), member 5	;	;	1	2	yes	0	0	0	0	1	1	0	0	1	0
EOG090C0FJ9	ENSGACG00000016771	mitochondrial fission process 1	ENSONIG00000000193	mitochondrial fission process 1	MTFP1	mitochondrial fission process 1	1	1	yes	0	0	0	0	0	0	1	0	0	1
EOG090C02OC	ENSGACG00000016131	deltaD	ENSONIG00000000194;ENSONIG00000017050	Delta-like protein;Delta-like protein	dla;	deltaA ;delta like canonical Notch ligand 1	1	2	no	0	0	0	0	0	0	0	0	0	0
EOG090C08TW	ENSGACG00000016768	lectin, mannose-binding 2-like	ENSONIG00000000196	Transmembrane:Helical	lman2la	VIP36-like protein	1	1	no	0	0	0	0	0	0	0	0	0	0
EOG090C0B7Q	ENSGACG00000019734	ras homolog family member U	ENSONIG00000000197	Similarity:Belongs to the small GTPase superfamily. Rho family.	si:ch211-133l11.10	rho-related GTP-binding protein RhoU	1	1	no	0	0	0	0	0	0	0	0	0	0
EOG090C07RC	ENSGACG00000015028	glycine amidinotransferase (L-arginine:glycine amidinotransferase)	ENSONIG00000000198	glycine amidinotransferase (L-arginine:glycine amidinotransferase)	gatm	glycine amidinotransferase	1	1	no	0	0	0	0	0	0	0	0	0	0
EOG090C09CT	ENSGACG00000000258;ENSGACG00000007432	Rho GTPase activating protein 19 ;\N	ENSONIG00000000199;ENSONIG00000018324	Rho GTPase activating protein 19 ;Uncharacterized protein	arhgap19;	rho GTPase-activating protein 19 ;rho GTPase-activating protein 19	2	2	no	0	0	0	0	0	0	0	0	0	0
EOG090C02JF	ENSGACG00000015037	phosphodiesterase 8A	ENSONIG00000000200;ENSONIG00000015454	phosphodiesterase 8A ;phosphodiesterase 8B	pde8a;pde8b	phosphodiesterase 8A ;phosphodiesterase 8B	1	2	no	0	0	0	0	0	0	0	0	0	0
EOG090C0CUT	ENSGACG00000016766	WW domain binding protein 1	ENSONIG00000000201	Transmembrane:Helical	wbp1	WW domain binding protein 1	1	1	no	0	0	0	0	0	0	0	0	0	0
EOG090C05Z2	ENSGACG00000016561	olfactomedin 2b	ENSONIG00000000204	Similarity:Contains olfactomedin-like domain.	olfm2b	olfactomedin 2b	1	1	no	0	0	0	0	0	0	0	0	0	0
EOG090C07R9	ENSGACG00000016747	paired box 8	ENSONIG00000000205	Similarity:Contains 1 paired domain.	pax8	paired box protein Pax-8	1	1	no	0	0	0	0	0	0	0	0	0	0
EOG090C071D	ENSGACG00000015040	\N	ENSONIG00000000206	Uncharacterized protein			1	1	no	0	0	0	0	0	0	0	0	0	0
EOG090C0471	ENSGACG00000015044	fibronectin type III and SPRY domain containing 2	ENSONIG00000000207	Similarity:Contains B30.2/SPRY domain.	FSD2	fibronectin type III and SPRY domain containing 2	1	1	no	0	0	0	0	0	0	0	0	0	0
EOG090C01HI	ENSGACG00000016743	pleckstrin and Sec7 domain containing 4	ENSONIG00000000208	pleckstrin and Sec7 domain containing 4			1	1	no	0	0	0	0	0	0	0	0	0	0
EOG090C03UW	ENSGACG00000015047	WAS protein homolog associated with actin, golgi membranes and microtubules	ENSONIG00000000209	WAS protein homolog associated with actin, golgi membranes and microtubules	WHAMM	WAS protein homolog associated with actin, golgi membranes and microtubules	1	1	no	0	0	0	0	0	0	0	0	0	0
EOG090C06XB	ENSGACG00000016739	suppressor APC domain containing 2	ENSONIG00000000212	suppressor APC domain containing 2	SAPCD2	suppressor APC domain containing 2	1	1	no	0	0	0	0	0	0	0	0	0	0
EOG090C07BK	ENSGACG00000016566	thyroid hormone receptor interactor 10	ENSONIG00000000213	Similarity:Contains 1 SH3 domain.	trip10b	thyroid hormone receptor interactor 10b	1	1	no	0	0	0	0	0	0	0	0	0	0
EOG090C091P	ENSGACG00000015051	homer scaffolding protein 2	ENSONIG00000000214	homer scaffolding protein 2	homer2	homer scaffold protein 2	1	1	no	0	0	0	0	0	0	0	0	0	0
EOG090C0CTX	ENSGACG00000016735	zinc finger, MYND-type containing 19	ENSONIG00000000219	Similarity:Contains MYND-type zinc finger.	zmynd19	zinc finger MYND-type containing 19	1	1	no	0	0	0	0	0	0	0	0	0	0
EOG090C02I3	ENSGACG00000016568	SH2 domain containing 3A	ENSONIG00000000220	SH2 domain containing 3A	SH2D3A	SH2 domain containing 3A	1	1	no	0	0	0	0	0	0	0	0	0	0
EOG090C06FZ	ENSGACG00000015053	BTB (POZ) domain containing 1	ENSONIG00000000221	Similarity:Contains 1 BTB (POZ) domain.	BTBD1	BTB domain containing 1	1	1	no	0	0	0	0	0	0	0	0	0	0
EOG090C07DS	ENSGACG00000016732	B-box and SPRY domain containing	ENSONIG00000000222	Similarity:Contains B30.2/SPRY domain.	bspry	B-box and SPRY domain containing	1	1	no	0	0	0	0	0	0	0	0	0	0
EOG090C070A	ENSGACG00000019609	solute carrier family 7 (anionic amino acid transporter light chain, xc- system), member 11	ENSONIG00000000223	Transmembrane:Helical	slc7a11	solute carrier family 7 member 11	1	1	no	0	0	0	0	0	0	0	0	0	0
EOG090C02RL	ENSGACG00000004270	adhesion G protein-coupled receptor F11	ENSONIG00000000224	Similarity:Contains GPS domain.			1	1	no	0	0	0	0	0	0	0	0	0	0
EOG090C08NJ	ENSGACG00000015059	transmembrane 6 superfamily member 1	ENSONIG00000000225	Transmembrane:Helical	TM6SF1	transmembrane 6 superfamily member 1	1	1	no	0	0	0	0	0	0	0	0	0	0
EOG090C02DK	ENSGACG00000016580	vav 1 guanine nucleotide exchange factor	ENSONIG00000000226	Similarity:Contains 1 PH domain.	VAV1	vav guanine nucleotide exchange factor 1	1	1	no	0	0	0	0	0	0	0	0	0	0
EOG090C08V4	ENSGACG00000013590	ubiquitin protein ligase E3 component n-recognin 7	ENSONIG00000000227	ubiquitin protein ligase E3 component n-recognin 7	ubr7	ubiquitin protein ligase E3 component n-recognin 7	1	1	no	0	0	0	0	0	0	0	0	0	0
EOG090C09JK	ENSGACG00000015069	zinc finger (CCCH type), RNA-binding motif and serine/arginine rich 2	ENSONIG00000000228	Similarity:Contains RRM (RNA recognition motif) domain.	zrsr2	zinc finger (CCCH type), RNA-binding motif and serine/arginine rich 2	1	1	no	0	0	0	0	0	0	0	0	0	0
EOG090C0EV1	ENSGACG00000014006;ENSGACG00000015072	adaptor-related protein complex 1, sigma 2 subunit ;adaptor-related protein complex 1, sigma 2 subunit	ENSONIG00000000229;ENSONIG00000003167	adaptor-related protein complex 1, sigma 2 subunit ;adaptor-related protein complex 1, sigma 2 subunit	zgc:162858;	AP-1 complex subunit sigma-2 ;	2	2	no	0	0	0	0	0	0	0	0	0	0
EOG090C06EX	ENSGACG00000013627	ankyrin repeat and SOCS box containing 2a, tandem duplicate 1	ENSONIG00000000231	Similarity:Contains 10 ANK repeats.	asb2a.1	ankyrin repeat and SOCS box containing 2a, tandem duplicate 1	1	1	no	0	0	0	0	0	0	0	0	0	0
EOG090C03MD	ENSGACG00000013107	\N	ENSONIG00000000233;ENSONIG00000000243;ENSONIG00000000314;ENSONIG00000004482;ENSONIG00000005491;ENSONIG00000010736;ENSONIG00000012313;ENSONIG00000012315;ENSONIG00000013819;ENSONIG00000013863;ENSONIG00000014210	Uncharacterized protein ;Uncharacterized protein ;Uncharacterized protein ;Uncharacterized protein ;Uncharacterized protein ;Uncharacterized protein ;Uncharacterized protein ;Uncharacterized protein ;Uncharacterized protein ;Uncharacterized protein ;Uncharacterized protein	;;;;;;;;;;	;;;;;;;;;;	1	11	no	0	0	0	0	0	0	0	0	0	0
EOG090C02ND	ENSGACG00000000256;ENSGACG00000002054;ENSGACG00000012578	si:dkey-27j5.9 ;si:dkey-27j5.9 ;si:ch211-152f2.2	ENSONIG00000000235;ENSONIG00000000299;ENSONIG00000000301;ENSONIG00000000302;ENSONIG00000000303;ENSONIG00000001593	si:dkey-27j5.9 ;Immunoglobulin-like domain;Immunoglobulin-like domain;Immunoglobulin-like domain;Immunoglobulin-like domain;Immunoglobulin-like domain	si:ch211-1f22.10;;;;;	si:ch211-1f22.10 ;;;;;	3	6	yes	0	0	0	0	0	2	1	0	1	1
EOG090C038Y	ENSGACG00000013637	protein phosphatase 4, regulatory subunit 4	ENSONIG00000000237	protein phosphatase 4, regulatory subunit 4	ppp4r4	protein phosphatase 4, regulatory subunit 4	1	1	no	0	0	0	0	0	0	0	0	0	0
EOG090C03YY	ENSGACG00000002627	\N	ENSONIG00000000240;ENSONIG00000011313;ENSONIG00000014258	Uncharacterized protein ;Uncharacterized protein ;Uncharacterized protein	;;	;;	1	3	no	0	0	0	0	0	0	0	0	0	0
EOG090C0ASB	ENSGACG00000013654	serpin peptidase inhibitor, clade A (alpha-1 antiproteinase, antitrypsin), member 10a	ENSONIG00000000242	Similarity:Belongs to the serpin family.			1	1	no	0	0	0	0	0	0	0	0	0	0
EOG090C0A6M	ENSGACG00000013664	X-ray repair complementing defective repair in Chinese hamster cells 3	ENSONIG00000000245	X-ray repair complementing defective repair in Chinese hamster cells 3	xrcc3	X-ray repair complementing defective repair in Chinese hamster cells 3	1	1	no	0	0	0	0	0	0	0	0	0	0
EOG090C0462	ENSGACG00000004823;ENSGACG00000013671	BRF1, RNA polymerase III transcription initiation factor a ;\N	ENSONIG00000000246;ENSONIG00000001665;ENSONIG00000011017	Brf1, TBP-binding domain;BRF1, RNA polymerase III transcription initiation factor a ;Brf1, TBP-binding domain	BRF1;;	BRF1, RNA polymerase III transcription initiation factor subunit ;;	2	3	no	0	0	0	0	0	0	0	0	0	0
EOG090C0FXR	ENSGACG00000003262	small nuclear ribonucleoprotein polypeptides B and B1	ENSONIG00000000248	Small nuclear ribonucleoprotein-associated protein	snrpb	small nuclear ribonucleoprotein polypeptides B and B1	1	1	yes	0	1	0	0	0	0	0	0	0	0
EOG090C0EPO	ENSGACG00000003458	\N	ENSONIG00000000249;ENSONIG00000021271	Uncharacterized protein ;Uncharacterized protein	;	;	1	2	no	0	0	0	0	0	0	0	0	0	0
EOG090C0CDQ	ENSGACG00000003282	\N	ENSONIG00000000250	Transmembrane:Helical		E3 ubiquitin-protein ligase RNF182	1	1	no	0	0	0	0	0	0	0	0	0	0
EOG090C0GLV	ENSGACG00000016584	ubiquitin-like 5	ENSONIG00000000251	ubiquitin-like 5	UBL5	ubiquitin like 5	1	1	no	0	0	0	0	0	0	0	0	0	0
EOG090C0FGS	ENSGACG00000003284	zgc:109913	ENSONIG00000000252	zgc:109913	zgc:109913	zgc:109913	1	1	no	0	0	0	0	0	0	0	0	0	0
EOG090C0DXD	ENSGACG00000016585	protein (peptidyl-prolyl cis/trans isomerase) NIMA-interacting 1	ENSONIG00000000253	Similarity:Contains 1 PpiC domain.	pin1	peptidylprolyl cis/trans isomerase, NIMA-interacting 1	1	1	no	0	0	0	0	0	0	0	0	0	0
EOG090C0F2K	ENSGACG00000003290	ubiquitin-conjugating enzyme E2C	ENSONIG00000000254	Similarity:Belongs to the ubiquitin-conjugating enzyme family.	ube2c	ubiquitin-conjugating enzyme E2C	1	1	no	0	0	0	0	0	0	0	0	0	0
EOG090C0FRZ	ENSGACG00000003310	polymerase (RNA) II (DNA directed) polypeptide J	ENSONIG00000000259	polymerase (RNA) II (DNA directed) polypeptide J	polr2j	RNA polymerase II subunit J	1	1	no	0	0	0	0	0	0	0	0	0	0
EOG090C04X9	ENSGACG00000004185	solute carrier family 5 (sodium/multivitamin and iodide cotransporter), member 6a	ENSONIG00000000260	Similarity:Belongs to the sodium:solute symporter (SSF) (TC 2.A.21) family.	slc5a6a	sodium-dependent multivitamin transporter	1	1	no	0	0	0	0	0	0	0	0	0	0
EOG090C03DV	ENSGACG00000003325	PDX1 C-terminal inhibiting factor 1	ENSONIG00000000261	PDX1 C-terminal inhibiting factor 1	pcif1	PDX1 C-terminal inhibiting factor 1	1	1	no	0	0	0	0	0	0	0	0	0	0
EOG090C08Y0	ENSGACG00000003330	\N	ENSONIG00000000263	Uncharacterized protein		haloacid dehalogenase-like hydrolase domain-containing 5	1	1	no	0	0	0	0	0	0	0	0	0	0
EOG090C02TZ	ENSGACG00000000245;ENSGACG00000007529	cyclin and CBS domain divalent metal cation transport mediator 1 ;cyclin and CBS domain divalent metal cation transport mediator 1	ENSONIG00000000264;ENSONIG00000018340	Transmembrane:Helical;Transmembrane:Helical	CNNM1 (1 of many);CNNM1 (1 of many)	cyclin and CBS domain divalent metal cation transport mediator 1 ;cyclin and CBS domain divalent metal cation transport mediator 1	2	2	no	0	0	0	0	0	0	0	0	0	0
EOG090C0BFW	ENSGACG00000004217	ribosomal protein L7-like 1	ENSONIG00000000266	ribosomal protein L7-like 1	rpl7l1	ribosomal protein L7 like 1	1	1	no	0	0	0	0	0	0	0	0	0	0
EOG090C0C9X	ENSGACG00000003342	RAB43, member RAS oncogene family	ENSONIG00000000267	RAB43, member RAS oncogene family	isy1	ISY1 splicing factor homolog	1	1	no	0	0	0	0	0	0	0	0	0	0
EOG090C07GY	ENSGACG00000000254;ENSGACG00000007534	glutamic-oxaloacetic transaminase 1, soluble ;glutamic-oxaloacetic transaminase 1, soluble	ENSONIG00000000268;ENSONIG00000018342	Aspartate aminotransferase;Aspartate aminotransferase	GOT1 (1 of many);got1	glutamic-oxaloacetic transaminase 1 ;glutamic-oxaloacetic transaminase 1, soluble	2	2	yes	0	0	0	0	0	0	0	0	0	1
EOG090C0EMY	ENSGACG00000000061	CCHC-type zinc finger, nucleic acid binding protein a	ENSONIG00000000269	CCHC-type zinc finger, nucleic acid binding protein b	CNBP	CCHC-type zinc finger nucleic acid binding protein	1	1	no	0	0	0	0	0	0	0	0	0	0
EOG090C0AQC	ENSGACG00000004242	si:dkey-1j5.4	ENSONIG00000000270	si:dkey-1j5.4			1	1	no	0	0	0	0	0	0	0	0	0	0
EOG090C0B2C	ENSGACG00000007939;ENSGACG00000018466	zgc:174680 ;\N	ENSONIG00000000271;ENSONIG00000017650	Uncharacterized protein ;Uncharacterized protein	;	;	2	2	no	0	0	0	0	0	0	0	0	0	0
EOG090C08PX	ENSGACG00000003371	si:ch211-15p9.2	ENSONIG00000000272	Similarity:Belongs to the PP2C family.	si:ch211-15p9.2	si:ch211-15p9.2	1	1	no	0	0	0	0	0	0	0	0	0	0
EOG090C0EYA	ENSGACG00000004246	cornichon family AMPA receptor auxiliary protein 3	ENSONIG00000000273	Transmembrane:Helical	cnih3	protein cornichon homolog 3	1	1	no	0	0	0	0	0	0	0	0	0	0
EOG090C07XL	ENSGACG00000002797;ENSGACG00000003376	RNA binding motif protein 39a ;RNA binding motif protein 39a	ENSONIG00000000274;ENSONIG00000017310	RNA binding motif protein 39a ;RNA binding motif protein 39a	;rbm39b	;RNA binding motif protein 39b	2	2	no	0	0	0	0	0	0	0	0	0	0
EOG090C00MY	ENSGACG00000019933	\N	ENSONIG00000000276;ENSONIG00000003479;ENSONIG00000005494;ENSONIG00000005530;ENSONIG00000006396;ENSONIG00000015975;ENSONIG00000020199;ENSONIG00000020472;ENSONIG00000020538;ENSONIG00000020797;ENSONIG00000020799;ENSONIG00000020874	Uncharacterized protein ;Uncharacterized protein ;Uncharacterized protein ;Uncharacterized protein ;Uncharacterized protein ;Uncharacterized protein ;Uncharacterized protein ;Uncharacterized protein ;Uncharacterized protein ;Uncharacterized protein ;Uncharacterized protein ;Uncharacterized protein	;;si:dkey-85k7.12;;;;;;;;;	;;si:dkey-85k7.12 ;up-regulator of cell proliferation ;;;;;up-regulator of cell proliferation-like ;;;	1	12	yes	0	0	0	0	0	0	0	0	0	1
EOG090C026T	ENSGACG00000001634	SMG7 nonsense mediated mRNA decay factor	ENSONIG00000000277	SMG7 nonsense mediated mRNA decay factor	smg7	SMG7 nonsense mediated mRNA decay factor	1	1	no	0	0	0	0	0	0	0	0	0	0
EOG090C0A07	ENSGACG00000003387	TSEN2 tRNA splicing endonuclease subunit	ENSONIG00000000278	tRNA-splicing endonuclease subunit Sen2	tsen2	TSEN2 tRNA splicing endonuclease subunit	1	1	no	0	0	0	0	0	0	0	0	0	0
EOG090C0DNE	ENSGACG00000003394	MKRN2 opposite strand	ENSONIG00000000280	MKRN2 opposite strand	mkrn2os.2	MKRN2 opposite strand, tandem duplicate 2	1	1	no	0	0	0	0	0	0	0	0	0	0
EOG090C07LK	ENSGACG00000003396	makorin, ring finger protein, 2	ENSONIG00000000281	Similarity:Contains RING-type zinc finger.	mkrn2	makorin, ring finger protein, 2	1	1	no	0	0	0	0	0	0	0	0	0	0
EOG090C013J	ENSGACG00000019550	zinc finger protein 629	ENSONIG00000000282;ENSONIG00000003856;ENSONIG00000005486;ENSONIG00000007810	zinc finger protein 629 ;zinc finger protein 629 ;Uncharacterized protein ;Uncharacterized protein	;;;	;;;	1	4	no	0	0	0	0	0	0	0	0	0	0
EOG090C0A8L	ENSGACG00000001647	nicotinamide nucleotide adenylyltransferase 2	ENSONIG00000000283	Nicotinate-nucleotide adenylyltransferase	nmnat2	nicotinamide nucleotide adenylyltransferase 2	1	1	no	0	0	0	0	0	0	0	0	0	0
EOG090C05YV	ENSGACG00000018896	TOX high mobility group box family member 4	ENSONIG00000000284	TOX high mobility group box family member 4	tox4b	TOX high mobility group box family member 4	1	1	no	0	0	0	0	0	0	0	0	0	0
EOG090C08NP	ENSGACG00000014826	solute carrier family 25 (mitochondrial iron transporter), member 28	ENSONIG00000000285	Similarity:Belongs to the mitochondrial carrier (TC 2.A.29) family.	SLC25A28 (1 of many)	solute carrier family 25 member 28	1	1	no	0	0	0	0	0	0	0	0	0	0
EOG090C04C0	ENSGACG00000014824	ectonucleoside triphosphate diphosphohydrolase 7	ENSONIG00000000286	Similarity:Belongs to the GDA1/CD39 NTPase family.	ENTPD7	ectonucleoside triphosphate diphosphohydrolase 7	1	1	no	0	0	0	0	0	0	0	0	0	0
EOG090C016H	ENSGACG00000018893	solute carrier family 12 (potassium/chloride transporter), member 6	ENSONIG00000000287	Transmembrane:Helical	SLC12A6	solute carrier family 12 member 6	1	1	no	0	0	0	0	0	0	0	0	0	0
EOG090C013B	ENSGACG00000001675	laminin, gamma 2	ENSONIG00000000288	Transmembrane:Helical	LAMC2	laminin subunit gamma 2	1	1	yes	0	0	0	0	0	1	0	0	1	0
EOG090C0FDS	ENSGACG00000003413	family with sequence similarity 107, member A	ENSONIG00000000289	family with sequence similarity 107, member A	si:ch211-236d3.4	family with sequence similarity 107 member A	1	1	no	0	0	0	0	0	0	0	0	0	0
EOG090C0GSM	ENSGACG00000018892	NOP10 ribonucleoprotein homolog (yeast)	ENSONIG00000000291	NOP10 ribonucleoprotein homolog (yeast)	nop10	NOP10 ribonucleoprotein	1	1	no	0	0	0	0	0	0	0	0	0	0
EOG090C05VY	ENSGACG00000018883	lysophosphatidylcholine acyltransferase 4	ENSONIG00000000292	Transmembrane:Helical	lpcat4	lysophospholipid acyltransferase LPCAT4	1	1	no	0	0	0	0	0	0	0	0	0	0
EOG090C0GFN	ENSGACG00000018438	ATPase, H+ transporting, lysosomal V0 subunit e1	ENSONIG00000000295	Transmembrane:Helical	atpv0e2	V-type proton ATPase subunit e 2	1	1	no	0	0	0	0	0	0	0	0	0	0
EOG090C0EDJ	ENSGACG00000018876	ER membrane protein complex subunit 4	ENSONIG00000000296	Transmembrane:Helical	emc4	ER membrane protein complex subunit 4	1	1	no	0	0	0	0	0	0	0	0	0	0
EOG090C04PV	ENSGACG00000003426	aldehyde dehydrogenase 4 family, member A1	ENSONIG00000000298	Similarity:Belongs to the aldehyde dehydrogenase family.	aldh4a1	aldehyde dehydrogenase 4 family, member A1	1	1	no	0	0	0	0	0	0	0	0	0	0
EOG090C024J	ENSGACG00000018872	\N	ENSONIG00000000300	Similarity:Contains USP domain.			1	1	no	0	0	0	0	0	0	0	0	0	0
EOG090C01CO	ENSGACG00000003027;ENSGACG00000003484	\N;ring finger protein 123	ENSONIG00000000304	ring finger protein 123	rnf123	ring finger protein 123	2	1	no	0	0	0	0	0	0	0	0	0	0
EOG090C00N4	ENSGACG00000000155;ENSGACG00000001736;ENSGACG00000001742;ENSGACG00000019826	complement component 3 ;\N;\N;complement component 3	ENSONIG00000000306	Similarity:Contains NTR domain.	c3b.2	complement component c3b, tandem duplicate 2	4	1	yes	0	0	0	0	0	3	0	0	3	0
EOG090C00ZD	ENSGACG00000018870	\N	ENSONIG00000000307	Similarity:Belongs to the adenylyl cyclase class-4/guanylyl cyclase family.		adenylate cyclase type 2	1	1	no	0	0	0	0	0	0	0	0	0	0
EOG090C01UU	ENSGACG00000002655;ENSGACG00000003043	glutamate receptor, metabotropic 7 ;glutamate receptor, metabotropic 7	ENSONIG00000000308;ENSONIG00000017384	Transmembrane:Helical;Transmembrane:Helical	GRM7;	glutamate metabotropic receptor 7 ;metabotropic glutamate receptor 7	2	2	yes	0	0	0	0	0	1	0	0	1	0
EOG090C021L	ENSGACG00000018867	KH and NYN domain containing	ENSONIG00000000309	KH and NYN domain containing	khnyn	KH and NYN domain containing	1	1	yes	0	0	0	0	0	1	0	0	0	0
EOG090C07MZ	ENSGACG00000018866	\N	ENSONIG00000000311	receptor-interacting serine-threonine kinase 3	ripk3	receptor-interacting serine/threonine-protein kinase 3	1	1	yes	0	0	0	0	0	1	0	0	1	0
EOG090C0DSK	ENSGACG00000018855	cerebellin 3 precursor	ENSONIG00000000312	cerebellin 3 precursor	si:dkeyp-74b6.2	cerebellin-1	1	1	yes	0	0	0	0	0	1	0	0	0	1
EOG090C05RZ	ENSGACG00000000208;ENSGACG00000000849;ENSGACG00000001749;ENSGACG00000001763;ENSGACG00000018835;ENSGACG00000018840;ENSGACG00000018845;ENSGACG00000018850;ENSGACG00000020181	\N;\N;\N;\N;\N;\N;\N;\N;\N	ENSONIG00000000313;ENSONIG00000000317	Similarity:Contains B30.2/SPRY domain.;Similarity:Contains B30.2/SPRY domain.	;	E3 ubiquitin-protein ligase TRIM39 ;nuclear factor 7, brain	9	2	no	0	0	0	0	0	0	0	0	0	0
EOG090C01S5	ENSGACG00000001405	discs, large (Drosophila) homolog 1, like	ENSONIG00000000315	Similarity:Contains 1 SH3 domain.			1	1	no	0	0	0	0	0	0	0	0	0	0
EOG090C0509	ENSGACG00000018830	\N	ENSONIG00000000318;ENSONIG00000019815	Similarity:Contains B30.2/SPRY domain.;Similarity:Contains RING-type zinc finger.	;	;	1	2	no	0	0	0	0	0	0	0	0	0	0
EOG090C04L8	ENSGACG00000003404;ENSGACG00000003405;ENSGACG00000003408	\N;\N;\N	ENSONIG00000000321;ENSONIG00000015458;ENSONIG00000019068;ENSONIG00000019070;ENSONIG00000019072;ENSONIG00000019111;ENSONIG00000019997	Similarity:Contains B30.2/SPRY domain.;Similarity:Contains B30.2/SPRY domain.;Similarity:Contains B30.2/SPRY domain.;Uncharacterized protein ;Uncharacterized protein ;Similarity:Contains B30.2/SPRY domain.;Similarity:Contains B30.2/SPRY domain.	;;;;;;	neoverrucotoxin subunit alpha-like ;;;neoverrucotoxin subunit alpha-like ;;;	3	7	yes	0	0	0	0	0	0	0	1	0	0
EOG090C0AJN	ENSGACG00000008985	si:ch1073-59l16.1	ENSONIG00000000322;ENSONIG00000000327;ENSONIG00000000328;ENSONIG00000000330;ENSONIG00000000331;ENSONIG00000000333;ENSONIG00000004663;ENSONIG00000009107;ENSONIG00000009110;ENSONIG00000018538;ENSONIG00000018539;ENSONIG00000018540	Transmembrane:Helical;Transmembrane:Helical;si:ch1073-59l16.1 ;si:ch1073-59l16.1 ;Transmembrane:Helical;si:ch1073-59l16.1 ;Transmembrane:Helical;Transmembrane:Helical;si:ch1073-59l16.1 ;Transmembrane:Helical;Transmembrane:Helical;si:ch1073-59l16.1	;;;;;;;;;;;	;polymeric immunoglobulin receptor ;;;;;;;;;;	1	12	no	0	0	0	0	0	0	0	0	0	0
EOG090C01PY	ENSGACG00000019004	\N	ENSONIG00000000324;ENSONIG00000006902;ENSONIG00000010110;ENSONIG00000011889;ENSONIG00000017739	Uncharacterized protein ;Uncharacterized protein ;Uncharacterized protein ;Uncharacterized protein ;SRCR domain	;;;;	;;;;	1	5	yes	0	0	0	0	0	1	0	0	0	0
EOG090C0IDR	ENSGACG00000000003	tripartite motif containing 14	ENSONIG00000000329;ENSONIG00000006668;ENSONIG00000007526;ENSONIG00000017779	tripartite motif containing 14 ;Similarity:Contains B30.2/SPRY domain.;Similarity:Contains B30.2/SPRY domain.;Similarity:Contains B30.2/SPRY domain.	;;;	;;;	1	4	no	0	0	0	0	0	0	0	0	0	0
EOG090C03J4	ENSGACG00000008990	polymerase (DNA directed), eta	ENSONIG00000000334	polymerase (DNA directed), eta	polh	polymerase (DNA directed), eta	1	1	no	0	0	0	0	0	0	0	0	0	0
EOG090C04YF	ENSGACG00000009007;ENSGACG00000019729	GTP binding protein 2 ;GTP binding protein 2	ENSONIG00000000337;ENSONIG00000011595	GTP binding protein 2 ;GTP binding protein 2	;	;	2	2	no	0	0	0	0	0	0	0	0	0	0
EOG090C0E5J	ENSGACG00000014852	\N	ENSONIG00000000339;ENSONIG00000000340;ENSONIG00000000361;ENSONIG00000008318;ENSONIG00000008737;ENSONIG00000009605;ENSONIG00000013828;ENSONIG00000013971;ENSONIG00000017105;ENSONIG00000018449	Uncharacterized protein ;Uncharacterized protein ;Uncharacterized protein ;Uncharacterized protein ;Uncharacterized protein ;Uncharacterized protein ;Uncharacterized protein ;Uncharacterized protein ;Uncharacterized protein ;Uncharacterized protein	;;;;;;;;;	;complement C1q tumor necrosis factor-related protein 3 ;complement C1q tumor necrosis factor-related protein 3 ;;complement C1q tumor necrosis factor-related protein 3 ;;complement C1q tumor necrosis factor-related protein 3 ;complement C1q tumor necrosis factor-related protein 3 ;;	1	10	no	0	0	0	0	0	0	0	0	0	0
EOG090C0I1A	ENSGACG00000000097;ENSGACG00000000266;ENSGACG00000000276;ENSGACG00000000542;ENSGACG00000000674;ENSGACG00000001243;ENSGACG00000001412;ENSGACG00000001451;ENSGACG00000001562;ENSGACG00000001812;ENSGACG00000002203;ENSGACG00000002403;ENSGACG00000010430;ENSGACG00000011234;ENSGACG00000011287;ENSGACG00000012029;ENSGACG00000012132;ENSGACG00000013395;ENSGACG00000014283;ENSGACG00000014772;ENSGACG00000015434;…	tripartite motif containing 14 ;tripartite motif containing 14 ;tripartite motif containing 14 ;tripartite motif containing 14 ;tripartite motif containing 14 ;tripartite motif containing 14 ;tripartite motif containing 14 ;tripartite motif containing 14 ;tripartite motif containing 14 ;tripartite motif containing 14 ;tripartite motif containing 14 ;tripartite motif containing 14 ;tripartite moti…	ENSONIG00000000341;ENSONIG00000003987;ENSONIG00000007329;ENSONIG00000007524;ENSONIG00000011315;ENSONIG00000016383	Similarity:Contains B30.2/SPRY domain.;Uncharacterized protein ;Similarity:Contains B30.2/SPRY domain.;tripartite motif containing 14 ;Similarity:Contains B30.2/SPRY domain.;Similarity:Contains B30.2/SPRY domain.	;;;;;	;;;;;	26	6	no	0	0	0	0	0	0	0	0	0	0
EOG090C0FZD	ENSGACG00000001771	preproinsulin	ENSONIG00000000343	Function:Insulin decreases blood glucose concentration. It increases cell permeability to monosaccharides, amino acids and fatty acids. It accelerates glycolysis, the pentose phosphate cycle, and glycogen synthesis in liver (By similarity).	ins	preproinsulin	1	1	no	0	0	0	0	0	0	0	0	0	0
EOG090C07IE	ENSGACG00000019822	coiled-coil domain containing 130	ENSONIG00000000344	coiled-coil domain containing 130	ccdc130	coiled-coil domain containing 130	1	1	no	0	0	0	0	0	0	0	0	0	0
EOG090C0A2X	ENSGACG00000001755	NIPA-like domain containing 4	ENSONIG00000000345	Transmembrane:Helical	nipal4	NIPA like domain containing 4	1	1	no	0	0	0	0	0	0	0	0	0	0
EOG090C0EZO	ENSGACG00000009024	otoraplin	ENSONIG00000000346	otoraplin			1	1	no	0	0	0	0	0	0	0	0	0	0
EOG090C03V6	ENSGACG00000009043	proprotein convertase subtilisin/kexin type 2	ENSONIG00000000347	proprotein convertase subtilisin/kexin type 2	pcsk2	proprotein convertase subtilisin/kexin type 2	1	1	no	0	0	0	0	0	0	0	0	0	0
EOG090C02BJ	ENSGACG00000018480	glutamate receptor, ionotropic, AMPA 1a	ENSONIG00000000348;ENSONIG00000017606	Transmembrane:Helical;Transmembrane:Helical	;gria1a	glutamate receptor 1 ;glutamate ionotropic receptor AMPA type subunit 1	1	2	no	0	0	0	0	0	0	0	0	0	0
EOG090C0AI9	ENSGACG00000019818	WD repeat domain containing 83	ENSONIG00000000349	WD repeat domain containing 83	wdr83	WD repeat domain 83	1	1	no	0	0	0	0	0	0	0	0	0	0
EOG090C0FWP	ENSGACG00000019815	WD repeat domain 83 opposite strand	ENSONIG00000000350	Transmembrane:Helical	wdr83os	WD repeat domain 83 opposite strand	1	1	no	0	0	0	0	0	0	0	0	0	0
EOG090C00DL	ENSGACG00000012741	calcium channel, voltage-dependent, P/Q type, alpha 1A subunit, a	ENSONIG00000000351;ENSONIG00000002030	Similarity:Belongs to the calcium channel alpha-1 subunit (TC 1.A.1.11) family.;Similarity:Belongs to the calcium channel alpha-1 subunit (TC 1.A.1.11) family.	cacna1ab;cacna1aa	calcium channel, voltage-dependent, P/Q type, alpha 1A subunit, b ;calcium channel, voltage-dependent, P/Q type, alpha 1A subunit, a	1	2	yes	1	0	0	0	0	0	0	0	1	0
EOG090C04WD	ENSGACG00000009101	beaded filament structural protein 1, filensin	ENSONIG00000000352	beaded filament structural protein 1, filensin	BFSP1	beaded filament structural protein 1	1	1	no	0	0	0	0	0	0	0	0	0	0
EOG090C084W	ENSGACG00000009110	\N	ENSONIG00000000353	Similarity:Belongs to the G-protein coupled receptor 1 family.	prokr1b	prokineticin receptor 2	1	1	no	0	0	0	0	0	0	0	0	0	0
EOG090C09GB	ENSGACG00000009115	pleckstrin	ENSONIG00000000354	Similarity:Contains 2 PH domains.	plek	pleckstrin	1	1	yes	0	0	0	0	0	1	0	0	0	0
EOG090C00RU	ENSGACG00000006814;ENSGACG00000009135	protocadherin-related 15b ;cadherin, EGF LAG seven-pass G-type receptor 2	ENSONIG00000000355;ENSONIG00000016438	Transmembrane:Helical;Transmembrane:Helical	pcdh15a;	protocadherin-related 15a ;	2	2	no	0	0	0	0	0	0	0	0	0	0
EOG090C0AFA	ENSGACG00000020827	neutrophil cytosolic factor 1	ENSONIG00000000357	Similarity:Contains 2 SH3 domains.	ncf1	neutrophil cytosolic factor 1	1	1	yes	0	0	0	0	0	0	0	0	1	0
EOG090C06GR	ENSGACG00000020829	beta-galactoside alpha-2,6-sialyltransferase 1	ENSONIG00000000358	ST6 beta-galactosamide alpha-2,6-sialyltranferase 1	st6gal1	ST6 beta-galactosamide alpha-2,6-sialyltranferase 1	1	1	no	0	0	0	0	0	0	0	0	0	0
EOG090C03WI	ENSGACG00000003741	transglutaminase 8	ENSONIG00000000359;ENSONIG00000004452;ENSONIG00000008028;ENSONIG00000011621;ENSONIG00000012540	transglutaminase 8 ;transglutaminase 8 ;transglutaminase 8 ;transglutaminase 8 ;transglutaminase 8	;;;;	;protein-glutamine gamma-glutamyltransferase 5 ;;;	1	5	no	0	0	0	0	0	0	0	0	0	0
EOG090C0AJL	ENSGACG00000003747	translocase of outer mitochondrial membrane 34	ENSONIG00000000360;ENSONIG00000012542	translocase of outer mitochondrial membrane 34 ;translocase of outer mitochondrial membrane 34	TOMM34;	translocase of outer mitochondrial membrane 34 ;	1	2	no	0	0	0	0	0	0	0	0	0	0
EOG090C0C65	ENSGACG00000002783;ENSGACG00000003522	tyrosine 3-monooxygenase/tryptophan 5-monooxygenase activation protein, beta polypeptide a ;tyrosine 3-monooxygenase/tryptophan 5-monooxygenase activation protein, beta	ENSONIG00000000363;ENSONIG00000017317	Similarity:Belongs to the 14-3-3 family.;Similarity:Belongs to the 14-3-3 family.	ywhaba;YWHAB (1 of many)	14-3-3 protein beta/alpha-A ;14-3-3 protein beta/alpha	2	2	no	0	0	0	0	0	0	0	0	0	0
EOG090C0DPY	ENSGACG00000010505	SRY (sex determining region Y)-box 18	ENSONIG00000000364	SRY (sex determining region Y)-box 18	SOX18	SRY-box 18	1	1	no	0	0	0	0	0	0	0	0	0	0
EOG090C0BZ8	ENSGACG00000010495	transcription elongation factor A (SII), 2	ENSONIG00000000365	transcription elongation factor A (SII), 2	tcea2	transcription elongation factor A (SII), 2	1	1	no	0	0	0	0	0	0	0	0	0	0
EOG090C0BAE	ENSGACG00000003513	regulating synaptic membrane exocytosis 4	ENSONIG00000000366	Similarity:Contains 1 C2 domain.	rims4	regulating synaptic membrane exocytosis 4	1	1	yes	0	0	0	0	0	1	0	0	0	0
EOG090C0B7L	ENSGACG00000009143	dickkopf WNT signaling pathway inhibitor 1a	ENSONIG00000000368	dickkopf WNT signaling pathway inhibitor 1a	dkk1a	dickkopf-related protein 1	1	1	no	0	0	0	0	0	0	0	0	0	0
EOG090C041N	ENSGACG00000009151	protein kinase, cGMP-dependent, type Ia	ENSONIG00000000369	cGMP-dependent protein kinase	prkg1a	cGMP-dependent protein kinase 1	1	1	no	0	0	0	0	0	0	0	0	0	0
EOG090C0GIB	ENSGACG00000003488	LSM3 homolog, U6 small nuclear RNA and mRNA degradation associated	ENSONIG00000000370;ENSONIG00000021369	LSM3 homolog, U6 small nuclear RNA and mRNA degradation associated ;LSM3 homolog, U6 small nuclear RNA and mRNA degradation associated	lsm3;	U6 snRNA-associated Sm-like protein LSm3 ;U6 snRNA-associated Sm-like protein LSm3	1	2	no	0	0	0	0	0	0	0	0	0	0
EOG090C03XI	ENSGACG00000002717	solute carrier family 6 (neurotransmitter transporter), member 6a	ENSONIG00000000371;ENSONIG00000017336	Transporter;Transporter	SLC6A6 (1 of many);SLC6A6 (1 of many)	solute carrier family 6 member 6 ;sodium- and chloride-dependent taurine transporter	1	2	no	0	0	0	0	0	0	0	0	0	0
EOG090C0DRG	ENSGACG00000010490	regulator of G-protein signaling 19	ENSONIG00000000372	Similarity:Contains 1 RGS domain.	rgs19	regulator of G protein signaling 19	1	1	no	0	0	0	0	0	0	0	0	0	0
EOG090C01CY	ENSGACG00000002707;ENSGACG00000003495	glutamate receptor interacting protein 2a ;glutamate receptor interacting protein 2b	ENSONIG00000000373;ENSONIG00000017348	Similarity:Contains 7 PDZ (DHR) domains.;Similarity:Contains 7 PDZ (DHR) domains.	grip2b;grip2a	glutamate receptor interacting protein 2b ;glutamate receptor-interacting protein 2	2	2	no	0	0	0	0	0	0	0	0	0	0
EOG090C0BH6	ENSGACG00000012424	T cell receptor beta variable 25-1	ENSONIG00000000375	T cell receptor beta variable 25-1			1	1	no	0	0	0	0	0	0	0	0	0	0
EOG090C014E	ENSGACG00000005303	papilin a, proteoglycan-like sulfated glycoprotein	ENSONIG00000000376	Similarity:Contains 1 BPTI/Kunitz inhibitor domain.	paplna	papilin a, proteoglycan-like sulfated glycoprotein	1	1	yes	0	0	0	0	0	1	0	0	1	0
EOG090C07BG	ENSGACG00000009168	sphingomyelin synthase 1	ENSONIG00000000377	Transmembrane:Helical	zgc:91976	zgc:91976	1	1	no	0	0	0	0	0	0	0	0	0	0
EOG090C09JS	ENSGACG00000005327	presenilin 1	ENSONIG00000000378	Presenilin	psen1	presenilin-1	1	1	no	0	0	0	0	0	0	0	0	0	0
EOG090C06CH	ENSGACG00000009178	multiple inositol-polyphosphate phosphatase 1a	ENSONIG00000000379	multiple inositol-polyphosphate phosphatase 1a	minpp1a	multiple inositol-polyphosphate phosphatase 1a	1	1	no	0	0	0	0	0	0	0	0	0	0
EOG090C09SD	ENSGACG00000003065	zgc:171566	ENSONIG00000000380	zgc:171566	zgc:171566	gamma-glutamyl hydrolase	1	1	no	0	0	0	0	0	0	0	0	0	0
EOG090C045K	ENSGACG00000009195	3'-phosphoadenosine 5'-phosphosulfate synthase 2a	ENSONIG00000000381	3'-phosphoadenosine 5'-phosphosulfate synthase 2a	papss2a	bifunctional 3'-phosphoadenosine 5'-phosphosulfate synthase 2	1	1	no	0	0	0	0	0	0	0	0	0	0
EOG090C0FYG	ENSGACG00000009220	\N	ENSONIG00000000382	Enhancer of rudimentary homolog	ERH	enhancer of rudimentary homolog	1	1	no	0	0	0	0	0	0	0	0	0	0
EOG090C00KN	ENSGACG00000000039	protein tyrosine phosphatase, receptor type, t	ENSONIG00000000384	Protein-tyrosine-phosphatase	ptprt	receptor-type tyrosine-protein phosphatase T	1	1	no	0	0	0	0	0	0	0	0	0	0
EOG090C05NT	ENSGACG00000005358	exonuclease 3'-5' domain containing 2	ENSONIG00000000385	Transmembrane:Helical	exd2	exonuclease 3'-5' domain containing 2	1	1	no	0	0	0	0	0	0	0	0	0	0
EOG090C07J6	ENSGACG00000009236	phosphatase and tensin homolog A	ENSONIG00000000386	phosphatase and tensin homolog A	ptena	phosphatidylinositol 3,4,5-trisphosphate 3-phosphatase and dual-specificity protein phosphatase PTEN	1	1	no	0	0	0	0	0	0	0	0	0	0
EOG090C06RS	ENSGACG00000005363	numb homolog (Drosophila)	ENSONIG00000000387	numb homolog (Drosophila)	numb	NUMB, endocytic adaptor protein	1	1	no	0	0	0	0	0	0	0	0	0	0
EOG090C0BDY	ENSGACG00000009282	\N	ENSONIG00000000388	Transmembrane:Helical		tumor necrosis factor receptor superfamily member 6	1	1	no	0	0	0	0	0	0	0	0	0	0
EOG090C04J1	ENSGACG00000005369	UDP-N-acetyl-alpha-D-galactosamine:polypeptide N-acetylgalactosaminyltransferase 16	ENSONIG00000000389	Protein-UDP acetylgalactosaminyltransferase	galnt16	polypeptide N-acetylgalactosaminyltransferase 16	1	1	no	0	0	0	0	0	0	0	0	0	0
EOG090C0BWV	ENSGACG00000009287	glutathione S-transferase omega 1	ENSONIG00000000391;ENSONIG00000013188	Similarity:Belongs to the GST superfamily.;Uncharacterized protein	GSTO1 (1 of many);	glutathione S-transferase omega-1 ;glutathione S-transferase omega-1	1	2	no	0	0	0	0	0	0	0	0	0	0
EOG090C0040	ENSGACG00000000037	chromodomain helicase DNA binding protein 6	ENSONIG00000000393	chromodomain helicase DNA binding protein 6	chd6	chromodomain helicase DNA binding protein 6	1	1	no	0	0	0	0	0	0	0	0	0	0
EOG090C0DFV	ENSGACG00000000196	syntaxin 10	ENSONIG00000000394	Transmembrane:Helical	stx10	syntaxin 10	1	1	no	0	0	0	0	0	0	0	0	0	0
EOG090C00LF	ENSGACG00000009318	cilia and flagella associated protein 43	ENSONIG00000000395	cilia and flagella associated protein 43	cfap43	cilia and flagella associated protein 43	1	1	no	0	0	0	0	0	0	0	0	0	0
EOG090C079H	ENSGACG00000009340	collagen, type XVII, alpha 1b	ENSONIG00000000397	Transmembrane:Helical			1	1	no	0	0	0	0	0	0	0	0	0	0
EOG090C026M	ENSGACG00000005379	vacuolar protein sorting 39 homolog (S. cerevisiae)	ENSONIG00000000398	vacuolar protein sorting 39 homolog (S. cerevisiae)	vps39	VPS39, HOPS complex subunit	1	1	no	0	0	0	0	0	0	0	0	0	0
EOG090C07TG	ENSGACG00000012757	nucleus accumbens associated 1, BEN and BTB (POZ) domain containing	ENSONIG00000000399;ENSONIG00000002027	Similarity:Contains 1 BTB (POZ) domain.;Similarity:Contains 1 BTB (POZ) domain.	nacc1b;nacc1a	nucleus accumbens associated 1, BEN and BTB (POZ) domain containing b ;nucleus accumbens associated 1, BEN and BTB (POZ) domain containing a	1	2	no	0	0	0	0	0	0	0	0	0	0
EOG090C04OV	ENSGACG00000000227	tRNA methyltransferase 1 homolog (S. cerevisiae)	ENSONIG00000000400	tRNA methyltransferase 1 homolog (S. cerevisiae)	trmt1	tRNA methyltransferase 1	1	1	no	0	0	0	0	0	0	0	0	0	0
EOG090C027C	ENSGACG00000000035	family with sequence similarity 65, member C	ENSONIG00000000401	family with sequence similarity 65, member C	ripor3	RIPOR family member 3	1	1	no	0	0	0	0	0	0	0	0	0	0
EOG090C01PX	ENSGACG00000009370;ENSGACG00000016303	STE20-like kinase ;STE20-like kinase b	ENSONIG00000000402;ENSONIG00000008924	STE20-like kinase ;STE20-like kinase b	slka;slkb	STE20 like kinase ;STE20-like kinase b	2	2	no	0	0	0	0	0	0	0	0	0	0
EOG090C01WL	ENSGACG00000005262	glucosidase, alpha	ENSONIG00000000403	Similarity:Belongs to the glycosyl hydrolase 31 family.	ganc	glucosidase, alpha; neutral C	1	1	no	0	0	0	0	0	0	0	0	0	0
EOG090C02R2	ENSGACG00000000027	minichromosome maintenance complex component 2	ENSONIG00000000404	DNA helicase	mcm2	minichromosome maintenance complex component 2	1	1	no	0	0	0	0	0	0	0	0	0	0
EOG090C01RG	ENSGACG00000000228	mannosidase, alpha, class 2B, member 1	ENSONIG00000000405	Alpha-mannosidase	man2b1	mannosidase, alpha, class 2B, member 1	1	1	no	0	0	0	0	0	0	0	0	0	0
EOG090C0880	ENSGACG00000003930	LIM and cysteine-rich domains 1	ENSONIG00000000408	Similarity:Contains 2 LIM zinc-binding domains.	lmcd1	LIM and cysteine-rich domains 1	1	1	no	0	0	0	0	0	0	0	0	0	0
EOG090C06IH	ENSGACG00000009385	neuralized E3 ubiquitin protein ligase 1	ENSONIG00000000409	neuralized E3 ubiquitin protein ligase 1		E3 ubiquitin-protein ligase NEURL1	1	1	yes	0	0	0	0	0	0	0	0	1	0
EOG090C00WN	ENSGACG00000009390	sortilin-related VPS10 domain containing receptor 3	ENSONIG00000000410;ENSONIG00000008935	Transmembrane:Helical;Transmembrane:Helical	sorcs3b;SORCS3 (1 of many)	sortilin related VPS10 domain containing receptor 3b ;VPS10 domain-containing receptor SorCS3	1	2	no	0	0	0	0	0	0	0	0	0	0
EOG090C09IK	ENSGACG00000002777;ENSGACG00000003935	abhydrolase domain containing 6b ;abhydrolase domain containing 6a	ENSONIG00000000411;ENSONIG00000017324	Transmembrane:Helical;Transmembrane:Helical	ABHD6 (1 of many);abhd6b	abhydrolase domain containing 6 ;abhydrolase domain containing 6b	2	2	no	0	0	0	0	0	0	0	0	0	0
EOG090C0DZ8	ENSGACG00000000918;ENSGACG00000000921;ENSGACG00000001046;ENSGACG00000001797;ENSGACG00000001801;ENSGACG00000005704;ENSGACG00000010883;ENSGACG00000010888;ENSGACG00000010893;ENSGACG00000010896;ENSGACG00000014258	\N;\N;\N;\N;\N;\N;\N;\N;\N;\N;\N	ENSONIG00000000412;ENSONIG00000005381;ENSONIG00000005383;ENSONIG00000005386;ENSONIG00000005388;ENSONIG00000005389;ENSONIG00000005392;ENSONIG00000020787	Uncharacterized protein ;Uncharacterized protein ;Uncharacterized protein ;Uncharacterized protein ;Uncharacterized protein ;Uncharacterized protein ;Uncharacterized protein ;Uncharacterized protein	;;;;;;;	;;;;;;;	11	8	no	0	0	0	0	0	0	0	0	0	0
EOG090C06W4	ENSGACG00000003953	PX domain containing serine/threonine kinase	ENSONIG00000000413	PX domain containing serine/threonine kinase	pxk	PX domain containing serine/threonine kinase like	1	1	no	0	0	0	0	0	0	0	0	0	0
EOG090C02NJ	ENSGACG00000004765;ENSGACG00000009653;ENSGACG00000013652;ENSGACG00000014395	zinc finger protein 629 ;\N;zinc finger protein 629 ;zinc finger protein 629	ENSONIG00000000414;ENSONIG00000001464;ENSONIG00000001498;ENSONIG00000006274;ENSONIG00000007812;ENSONIG00000011972;ENSONIG00000015019;ENSONIG00000016484;ENSONIG00000017889;ENSONIG00000019044;ENSONIG00000019616	si:ch211-261d7.6 ;Uncharacterized protein ;zinc finger protein 629 ;si:ch211-261d7.6 ;Uncharacterized protein ;si:ch211-261d7.6 ;si:ch211-261d7.6 ;si:ch211-261d7.6 ;si:ch211-261d7.6 ;zinc finger protein 629 ;zinc finger protein 629	;;;;;;;;;;	;;;;zinc finger and SCAN domain-containing protein 31-like ;;;;;;	4	11	no	0	0	0	0	0	0	0	0	0	0
EOG090C07VH	ENSGACG00000018802	\N	ENSONIG00000000415	Similarity:Contains B30.2/SPRY domain.		E3 ubiquitin-protein ligase TRIM39	1	1	no	0	0	0	0	0	0	0	0	0	0
EOG090C08OP	ENSGACG00000003959	pyruvate dehydrogenase (lipoamide) beta	ENSONIG00000000416	pyruvate dehydrogenase (lipoamide) beta	pdhb	pyruvate dehydrogenase E1 beta subunit	1	1	no	0	0	0	0	0	0	0	0	0	0
EOG090C075G	ENSGACG00000018805	triokinase/FMN cyclase	ENSONIG00000000417	triokinase/FMN cyclase	tkfc	triokinase/FMN cyclase	1	1	no	0	0	0	0	0	0	0	0	0	0
EOG090C02Z0	ENSGACG00000005202	zinc finger protein 106a	ENSONIG00000000418	zinc finger protein 106a	znf106a	zinc finger protein 106	1	1	no	0	0	0	0	0	0	0	0	0	0
EOG090C011R	ENSGACG00000009419	\N	ENSONIG00000000419;ENSONIG00000008941	Transmembrane:Helical;Transmembrane:Helical	SORCS1;	VPS10 domain-containing receptor SorCS1 ;	1	2	no	0	0	0	0	0	0	0	0	0	0
EOG090C08YW	ENSGACG00000005190	transmembrane protein 206	ENSONIG00000000420	Transmembrane:Helical	tmem206	transmembrane protein 206	1	1	no	0	0	0	0	0	0	0	0	0	0
EOG090C03YD	ENSGACG00000009438;ENSGACG00000018717	adducin 3 (gamma) b ;adducin 3 (gamma) a	ENSONIG00000000421;ENSONIG00000016310	adducin 3 (gamma) b ;adducin 3 (gamma) a	add3b;add3a	gamma-adducin ;gamma-adducin	2	2	yes	0	0	0	0	0	1	0	0	0	0
EOG090C0BX8	ENSGACG00000002781;ENSGACG00000003980	potassium channel tetramerization domain containing 6b ;\N	ENSONIG00000000422;ENSONIG00000017322	BTB/POZ domain;potassium channel tetramerization domain containing 6b	kctd6a;kctd6b	potassium channel tetramerization domain containing 6 ;BTB/POZ domain-containing protein KCTD6	2	2	no	0	0	0	0	0	0	0	0	0	0
EOG090C0EOI	ENSGACG00000005188	neudesin neurotrophic factor	ENSONIG00000000423	neudesin neurotrophic factor	nenf	neudesin neurotrophic factor	1	1	no	0	0	0	0	0	0	0	0	0	0
EOG090C02V0	ENSGACG00000018808	exocyst complex component 6B	ENSONIG00000000424	exocyst complex component 6B	exoc6b	exocyst complex component 6B	1	1	no	0	0	0	0	0	0	0	0	0	0
EOG090C005K	ENSGACG00000003984;ENSGACG00000003998	stabilin 1 ;stabilin 1	ENSONIG00000000426	stabilin 1			2	1	no	0	0	0	0	0	0	0	0	0	0
EOG090C07YV	ENSGACG00000005170	ezrin	ENSONIG00000000427	Similarity:Contains FERM domain.	ezra	ezrin	1	1	no	0	0	0	0	0	0	0	0	0	0
EOG090C00U2	ENSGACG00000010905	\N	ENSONIG00000000428;ENSONIG00000000431	Transmembrane:Helical;SRCR domain	;	;	1	2	yes	0	0	0	0	0	1	0	0	0	0
EOG090C0891	ENSGACG00000005165	potassium channel, subfamily K, member 3b	ENSONIG00000000429	Similarity:Belongs to the two pore domain potassium channel (TC 1.A.1.8) family.	kcnk3b	potassium channel subfamily K member 3	1	1	no	0	0	0	0	0	0	0	0	0	0
EOG090C0APZ	ENSGACG00000005133;ENSGACG00000005156	\N;\N	ENSONIG00000000430	Similarity:Contains MOSC domain.			2	1	yes	0	0	0	0	0	0	0	1	0	0
EOG090C0DF7	ENSGACG00000009461	MAX interactor 1, dimerization protein	ENSONIG00000000432	Similarity:Contains 1 basic helix-loop-helix (bHLH) domain.	MXI1 (1 of many)	MAX interactor 1, dimerization protein	1	1	no	0	0	0	0	0	0	0	0	0	0
EOG090C0DCM	ENSGACG00000009468	survival motor neuron domain containing 1	ENSONIG00000000434	survival motor neuron domain containing 1	smndc1	survival motor neuron domain containing 1	1	1	yes	0	1	0	0	0	0	0	0	0	0
EOG090C0FD9	ENSGACG00000010916	ribosomal protein S12	ENSONIG00000000435	40S ribosomal protein S12	rps12	ribosomal protein S12	1	1	yes	0	1	0	0	0	0	0	0	0	0
EOG090C0446	ENSGACG00000010932	EYA transcriptional coactivator and phosphatase 4	ENSONIG00000000436	Eyes absent homolog	eya4	EYA transcriptional coactivator and phosphatase 4	1	1	no	0	0	0	0	0	0	0	0	0	0
EOG090C05U5	ENSGACG00000005118	WD repeat domain 32	ENSONIG00000000437	WD repeat domain 32	wdr32	DDB1 and CUL4 associated factor 10	1	1	no	0	0	0	0	0	0	0	0	0	0
EOG090C0EOQ	ENSGACG00000009527	BCL2/adenovirus E1B interacting protein 4	ENSONIG00000000438	Transmembrane:Helical	bnip3	BCL2 interacting protein 3	1	1	no	0	0	0	0	0	0	0	0	0	0
EOG090C06P3	ENSGACG00000010950	tripartite motif containing 35	ENSONIG00000000441	Similarity:Contains B30.2/SPRY domain.		tripartite motif-containing protein 35	1	1	no	0	0	0	0	0	0	0	0	0	0
EOG090C02PC	ENSGACG00000005081	carboxypeptidase X (M14 family), member 1a	ENSONIG00000000442;ENSONIG00000001549	Similarity:Contains 1 F5/8 type C domain.;Similarity:Contains 1 F5/8 type C domain.	cpxm1a;cpxm1b	probable carboxypeptidase X1 ;probable carboxypeptidase X1	1	2	no	0	0	0	0	0	0	0	0	0	0
EOG090C06VK	ENSGACG00000009543	protein phosphatase 2, regulatory subunit B, delta	ENSONIG00000000443	Serine/threonine-protein phosphatase 2A 55 kDa regulatory subunit B	ppp2r2d	protein phosphatase 2, regulatory subunit B, delta	1	1	no	0	0	0	0	0	0	0	0	0	0
EOG090C0FKX	ENSGACG00000010957	transcription factor 21	ENSONIG00000000446	Similarity:Contains 1 basic helix-loop-helix (bHLH) domain.	tcf21	transcription factor 21	1	1	no	0	0	0	0	0	0	0	0	0	0
EOG090C0EBD	ENSGACG00000010959	TBP-like 1	ENSONIG00000000447	TBP-like 1	tbpl1	TATA-box binding protein like 1	1	1	no	0	0	0	0	0	0	0	0	0	0
EOG090C09JQ	ENSGACG00000014246	\N	ENSONIG00000000448;ENSONIG00000003691;ENSONIG00000006973;ENSONIG00000012418;ENSONIG00000014553;ENSONIG00000020392	Uncharacterized protein ;Similarity:Contains HECT (E6AP-type E3 ubiquitin-protein ligase) domain.;Uncharacterized protein ;\N;Similarity:Contains HECT (E6AP-type E3 ubiquitin-protein ligase) domain.;Similarity:Contains HECT (E6AP-type E3 ubiquitin-protein ligase) domain.	;;;;;	;;;;;	1	6	no	0	0	0	0	0	0	0	0	0	0
EOG090C02U1	ENSGACG00000005070	\N	ENSONIG00000000449	Transmembrane:Helical	zmp:0000000662	RING finger protein 145	1	1	no	0	0	0	0	0	0	0	0	0	0
EOG090C09UU	ENSGACG00000010968	solute carrier family 2 (facilitated glucose transporter), member 12	ENSONIG00000000450	Similarity:Belongs to the major facilitator superfamily. Sugar transporter (TC 2.A.1.1) family.	slc2a12	solute carrier family 2 member 12	1	1	no	0	0	0	0	0	0	0	0	0	0
EOG090C048P	ENSGACG00000009548	early B-cell factor 3a	ENSONIG00000000451	Similarity:Belongs to the COE family.	ebf3a	transcription factor COE3	1	1	no	0	0	0	0	0	0	0	0	0	0
EOG090C044T	ENSGACG00000010973	serum/glucocorticoid regulated kinase 1	ENSONIG00000000452	Catalytic Activity:ATP + a protein = ADP + a phosphoprotein.	SGK1	serum/glucocorticoid regulated kinase 1	1	1	no	0	0	0	0	0	0	0	0	0	0
EOG090C0697	ENSGACG00000018809	cytochrome P450, family 26, subfamily b, polypeptide 1	ENSONIG00000000453	Similarity:Belongs to the cytochrome P450 family.	cyp26b1	cytochrome P450, family 26, subfamily b, polypeptide 1	1	1	yes	0	0	0	0	0	1	0	0	0	0
EOG090C0ES8	ENSGACG00000005044;ENSGACG00000018665	ubiquitin-conjugating enzyme E2D 3 ;ubiquitin-conjugating enzyme E2D 2 (UBC4/5 homolog, yeast)	ENSONIG00000000454;ENSONIG00000015759	Similarity:Belongs to the ubiquitin-conjugating enzyme family.;Similarity:Belongs to the ubiquitin-conjugating enzyme family.	ube2d3;ube2d2	ubiquitin-conjugating enzyme E2 D2 ;ubiquitin-conjugating enzyme E2 D2	2	2	no	0	0	0	0	0	0	0	0	0	0
EOG090C05OX	ENSGACG00000000008;ENSGACG00000000040;ENSGACG00000003025;ENSGACG00000003039;ENSGACG00000003051;ENSGACG00000003585;ENSGACG00000003587	tripartite motif containing 35 ;tripartite motif containing 35 ;tripartite motif containing 35 ;tripartite motif containing 35 ;tripartite motif containing 35 ;tripartite motif containing 35 ;tripartite motif containing 35	ENSONIG00000000455;ENSONIG00000004380;ENSONIG00000004415;ENSONIG00000004510;ENSONIG00000004855;ENSONIG00000005242;ENSONIG00000007418;ENSONIG00000007419;ENSONIG00000007507;ENSONIG00000008158;ENSONIG00000008344;ENSONIG00000008838;ENSONIG00000009361;ENSONIG00000011858;ENSONIG00000013717;ENSONIG00000014015;ENSONIG00000015015;ENSONIG00000016082;ENSONIG00000016083;ENSONIG00000016085;ENSONIG00000019057;…	Similarity:Contains B30.2/SPRY domain.;Similarity:Contains B30.2/SPRY domain.;Similarity:Contains B30.2/SPRY domain.;Similarity:Contains B30.2/SPRY domain.;Similarity:Contains B30.2/SPRY domain.;Similarity:Contains B30.2/SPRY domain.;Similarity:Contains B30.2/SPRY domain.;Similarity:Contains B30.2/SPRY domain.;Similarity:Contains B30.2/SPRY domain.;Similarity:Contains B30.2/SPRY domain.;Similarit…	;;;;;;;;;;;;;;;;;;;;;;;;;;;;;;;;;	tripartite motif-containing protein 35 ;;;;;;;;;;;;;;;;;;;;;;;nuclear factor 7, ovary-like ;;;;;;;;nuclear factor 7, ovary-like ;;	7	34	no	0	0	0	0	0	0	0	0	0	0
EOG090C022E	ENSGACG00000004987	mannosidase, beta A, lysosomal	ENSONIG00000000456	mannosidase, beta A, lysosomal	manba	mannosidase beta	1	1	no	0	0	0	0	0	0	0	0	0	0
EOG090C013Z	ENSGACG00000004013	nischarin	ENSONIG00000000457	nischarin	nisch	nischarin	1	1	no	0	0	0	0	0	0	0	0	0	0
EOG090C0AD6	ENSGACG00000003649	GATA binding protein 5	ENSONIG00000000458	GATA binding protein 5	gata5	GATA binding protein 5	1	1	no	0	0	0	0	0	0	0	0	0	0
EOG090C05YL	ENSGACG00000011008	aldehyde dehydrogenase 8 family, member A1	ENSONIG00000000459	Similarity:Belongs to the aldehyde dehydrogenase family.	aldh8a1	aldehyde dehydrogenase 8 family, member A1	1	1	no	0	0	0	0	0	0	0	0	0	0
EOG090C03QB	ENSGACG00000011035	HBS1-like translational GTPase	ENSONIG00000000460	HBS1-like translational GTPase	hbs1l	HBS1-like translational GTPase	1	1	no	0	0	0	0	0	0	0	0	0	0
EOG090C008T	ENSGACG00000018813	dysferlin, limb girdle muscular dystrophy 2B (autosomal recessive)	ENSONIG00000000461	Similarity:Contains 5 C2 domains.	dysf	dysferlin, limb girdle muscular dystrophy 2B (autosomal recessive)	1	1	yes	1	0	0	0	0	0	0	0	0	0
EOG090C0AL2	ENSGACG00000004030	HGH1 homolog (S. cerevisiae)	ENSONIG00000000462	HGH1 homolog (S. cerevisiae)	hgh1	HGH1 homolog	1	1	no	0	0	0	0	0	0	0	0	0	0
EOG090C09LB	ENSGACG00000014232;ENSGACG00000015782;ENSGACG00000018423	pogo transposable element with KRAB domain ;pogo transposable element with KRAB domain ;pogo transposable element with KRAB domain	ENSONIG00000000463;ENSONIG00000000797;ENSONIG00000007925;ENSONIG00000010899;ENSONIG00000017354	pogo transposable element with KRAB domain ;pogo transposable element with KRAB domain ;pogo transposable element with KRAB domain ;pogo transposable element with KRAB domain ;pogo transposable element with KRAB domain	;;;;	;;;;	3	5	yes	0	0	0	0	0	1	0	0	0	0
EOG090C05M5	ENSGACG00000003658	HCK proto-oncogene, Src family tyrosine kinase	ENSONIG00000000464	Tyrosine-protein kinase	hck	HCK proto-oncogene, Src family tyrosine kinase	1	1	yes	0	0	0	0	0	1	0	0	0	0
EOG090C04L4	ENSGACG00000003663	transmembrane 9 superfamily protein member 4	ENSONIG00000000465	Transmembrane:Helical	tm9sf4	transmembrane 9 superfamily member 4	1	1	no	0	0	0	0	0	0	0	0	0	0
EOG090C0GOC	ENSGACG00000004042	zgc:153675	ENSONIG00000000466	zgc:153675	zgc:153675	transmembrane protein 263	1	1	no	0	0	0	0	0	0	0	0	0	0
EOG090C0194	ENSGACG00000011795	son of sevenless homolog 2 (Drosophila)	ENSONIG00000000467	Similarity:Contains 1 PH domain.	sos2	SOS Ras/Rho guanine nucleotide exchange factor 2	1	1	no	0	0	0	0	0	0	0	0	0	0
EOG090C05AX	ENSGACG00000004043	retinoblastoma binding protein 5	ENSONIG00000000468	retinoblastoma binding protein 5	rbbp5	RB binding protein 5, histone lysine methyltransferase complex subunit	1	1	no	0	0	0	0	0	0	0	0	0	0
EOG090C06J4	ENSGACG00000011054	v-myb avian myeloblastosis viral oncogene homolog	ENSONIG00000000469	v-myb avian myeloblastosis viral oncogene homolog	myb	MYB proto-oncogene, transcription factor	1	1	no	0	0	0	0	0	0	0	0	0	0
EOG090C0DFM	ENSGACG00000009577	O-6-methylguanine-DNA methyltransferase	ENSONIG00000000470	O-6-methylguanine-DNA methyltransferase	MGMT	O-6-methylguanine-DNA methyltransferase	1	1	no	0	0	0	0	0	0	0	0	0	0
EOG090C03E8	ENSGACG00000002663;ENSGACG00000009597	protein tyrosine phosphatase, receptor type, E, a ;protein tyrosine phosphatase, receptor type, E, b	ENSONIG00000000471;ENSONIG00000015969	Receptor-type tyrosine-protein phosphatase;Receptor-type tyrosine-protein phosphatase	ptpreb;ptprea	receptor-type tyrosine-protein phosphatase epsilon ;protein tyrosine phosphatase, receptor type, E, a	2	2	no	0	0	0	0	0	0	0	0	0	0
EOG090C063V	ENSGACG00000004054	inositol 1,3,4,5,6-pentakisphosphate 2-kinase	ENSONIG00000000472	inositol 1,3,4,5,6-pentakisphosphate 2-kinase	ippk	inositol-pentakisphosphate 2-kinase	1	1	no	0	0	0	0	0	0	0	0	0	0
EOG090C06T5	ENSGACG00000003704	pleiomorphic adenoma gene-like 2	ENSONIG00000000473	Uncharacterized protein	plagl2	PLAG1 like zinc finger 2	1	1	no	0	0	0	0	0	0	0	0	0	0
EOG090C07JN	ENSGACG00000003706	protein O-fucosyltransferase 1	ENSONIG00000000474	protein O-fucosyltransferase 1	pofut1	protein O-fucosyltransferase 1	1	1	no	0	0	0	0	0	0	0	0	0	0
EOG090C07AF	ENSGACG00000004058	extracellular matrix protein 2, female organ and adipocyte specific	ENSONIG00000000475	extracellular matrix protein 2, female organ and adipocyte specific	ECM2	extracellular matrix protein 2	1	1	no	0	0	0	0	0	0	0	0	0	0
EOG090C052X	ENSGACG00000011060	phosphodiesterase 7B	ENSONIG00000000476	phosphodiesterase 7B	PDE7B	phosphodiesterase 7B	1	1	no	0	0	0	0	0	0	0	0	0	0
EOG090C07SG	ENSGACG00000011810	L-2-hydroxyglutarate dehydrogenase	ENSONIG00000000477	L-2-hydroxyglutarate dehydrogenase	l2hgdh	L-2-hydroxyglutarate dehydrogenase	1	1	no	0	0	0	0	0	0	0	0	0	0
EOG090C09BI	ENSGACG00000004064	asporin (LRR class 1)	ENSONIG00000000479	Oreochromis niloticus biglycan-like protein 3 (bgl3), mRNA.	aspn	asporin (LRR class 1)	1	1	no	0	0	0	0	0	0	0	0	0	0
EOG090C0DEC	ENSGACG00000011836	ATP synthase, H+ transporting, mitochondrial F0 complex, subunit s	ENSONIG00000000480	ATP synthase, H+ transporting, mitochondrial F0 complex, subunit s	dmac2l	distal membrane arm assembly complex 2 like	1	1	no	0	0	0	0	0	0	0	0	0	0
EOG090C0AW4	ENSGACG00000011073	mitochondrial fission regulator 2	ENSONIG00000000482	mitochondrial fission regulator 2	mtfr2	mitochondrial fission regulator 2	1	1	no	0	0	0	0	0	0	0	0	0	0
EOG090C08GW	ENSGACG00000011842	cyclin-dependent kinase-like 1 (CDC2-related kinase)	ENSONIG00000000483	cyclin-dependent kinase-like 1 (CDC2-related kinase)	cdkl1	cyclin-dependent kinase-like 1 (CDC2-related kinase)	1	1	no	0	0	0	0	0	0	0	0	0	0
EOG090C0BNA	ENSGACG00000011079	armadillo repeat containing 1, like	ENSONIG00000000484	armadillo repeat containing 1, like	armc1l	armadillo repeat-containing protein 1	1	1	no	0	0	0	0	0	0	0	0	0	0
EOG090C06H5	ENSGACG00000009611	family with sequence similarity 196, member Ab	ENSONIG00000000485	family with sequence similarity 196, member Ab		protein FAM196A	1	1	no	0	0	0	0	0	0	0	0	0	0
EOG090C01YD	ENSGACG00000011850	mitogen-activated protein kinase kinase kinase kinase 5	ENSONIG00000000486	Mitogen-activated protein kinase kinase kinase kinase	map4k5	mitogen-activated protein kinase kinase kinase kinase 5	1	1	no	0	0	0	0	0	0	0	0	0	0
EOG090C0C4H	ENSGACG00000004073	osteoglycin	ENSONIG00000000488	osteoglycin	ogna	osteoglycin, paralog a	1	1	no	0	0	0	0	0	0	0	0	0	0
EOG090C05CA	ENSGACG00000011098	microtubule-associated protein 7	ENSONIG00000000489	microtubule-associated protein 7	si:ch73-217b7.1	si:ch73-217b7.1	1	1	no	0	0	0	0	0	0	0	0	0	0
EOG090C0530	ENSGACG00000003708	kinesin family member 3B	ENSONIG00000000490	Kinesin-like protein	kif3b	kinesin family member 3B	1	1	no	0	0	0	0	0	0	0	0	0	0
EOG090C04AB	ENSGACG00000004077	nucleolar protein 8	ENSONIG00000000491	nucleolar protein 8	nol8	nucleolar protein 8	1	1	no	0	0	0	0	0	0	0	0	0	0
EOG090C01WZ	ENSGACG00000002628;ENSGACG00000009617	ADAM metallopeptidase domain 12 ;ADAM metallopeptidase domain 12	ENSONIG00000000492;ENSONIG00000015999	Similarity:Contains 1 disintegrin domain.;Similarity:Contains 1 disintegrin domain.	adam12;ADAM12 (1 of many)	disintegrin and metalloproteinase domain-containing protein 12 ;ADAM metallopeptidase domain 12	2	2	no	0	0	0	0	0	0	0	0	0	0
EOG090C0A3D	ENSGACG00000013239	protein-L-isoaspartate (D-aspartate) O-methyltransferase domain containing 2	ENSONIG00000000493	protein-L-isoaspartate (D-aspartate) O-methyltransferase domain containing 2	PCMTD2	protein-L-isoaspartate (D-aspartate) O-methyltransferase domain containing 2	1	1	no	0	0	0	0	0	0	0	0	0	0
EOG090C06JZ	ENSGACG00000004094	G protein-coupled receptor 37 like 1a	ENSONIG00000000494	Transmembrane:Helical	gpr37l1a	G protein-coupled receptor 37 like 1a	1	1	yes	0	0	0	0	0	1	0	0	0	0
EOG090C0FJG	ENSGACG00000011108	protein phosphatase 1, regulatory (inhibitor) subunit 14C	ENSONIG00000000495	protein phosphatase 1, regulatory (inhibitor) subunit 14C	ppp1r14c	protein phosphatase 1 regulatory inhibitor subunit 14C	1	1	no	0	0	0	0	0	0	0	0	0	0
EOG090C015J	ENSGACG00000004097	ATPase, Ca++ transporting, plasma membrane 4	ENSONIG00000000496	Calcium-transporting ATPase	atp2b4	ATPase plasma membrane Ca2+ transporting 4	1	1	yes	0	0	0	0	0	0	0	0	1	0
EOG090C0AQG	ENSGACG00000011113	iodotyrosine deiodinase	ENSONIG00000000497	iodotyrosine deiodinase	si:ch211-286f9.2	iodotyrosine deiodinase	1	1	no	0	0	0	0	0	0	0	0	0	0
EOG090C06D8	ENSGACG00000001534	alcohol dehydrogenase, iron containing, 1	ENSONIG00000000498	alcohol dehydrogenase, iron containing, 1	adhfe1	alcohol dehydrogenase, iron containing, 1	1	1	yes	0	0	0	0	0	1	0	0	0	0
EOG090C018I	ENSGACG00000013224	myelin transcription factor 1b	ENSONIG00000000499	myelin transcription factor 1b	myt1b	myelin transcription factor 1b	1	1	no	0	0	0	0	0	0	0	0	0	0
EOG090C03RR	ENSGACG00000011115	SEC63 homolog, protein translocation regulator	ENSONIG00000000500	Transmembrane:Helical	sec63	SEC63 homolog, protein translocation regulator	1	1	no	0	0	0	0	0	0	0	0	0	0
EOG090C0AQS	ENSGACG00000011123	sex comb on midleg-like 4 (Drosophila)	ENSONIG00000000501	Transmembrane:Helical	scml4	Scm polycomb group protein like 4	1	1	no	0	0	0	0	0	0	0	0	0	0
EOG090C0072	ENSGACG00000011136	neuroblastoma amplified sequence	ENSONIG00000000502	neuroblastoma amplified sequence	nbas	neuroblastoma amplified sequence	1	1	no	0	0	0	0	0	0	0	0	0	0
EOG090C06W0	ENSGACG00000018970;ENSGACG00000018978	\N;\N	ENSONIG00000000503;ENSONIG00000007916;ENSONIG00000018716;ENSONIG00000018721;ENSONIG00000020390	Transmembrane:Helical;Transmembrane:Helical;Transmembrane:Helical;Transmembrane:Helical;Uncharacterized protein	;;;;	;;;GTPase IMAP family member 7-like ;	2	5	no	0	0	0	0	0	0	0	0	0	0
EOG090C05JY	ENSGACG00000013207	TBC1 domain family, member 22B	ENSONIG00000000505	TBC1 domain family, member 22B	tbc1d22b	TBC1 domain family, member 22B	1	1	no	0	0	0	0	0	0	0	0	0	0
EOG090C02ZP	ENSGACG00000002621	DEAH (Asp-Glu-Ala-His) box polypeptide 32a	ENSONIG00000000506;ENSONIG00000016005	Similarity:Contains helicase ATP-binding domain.;Similarity:Contains helicase ATP-binding domain.	dhx32b;dhx32a	putative pre-mRNA-splicing factor ATP-dependent RNA helicase DHX32 ;DEAH (Asp-Glu-Ala-His) box polypeptide 32a	1	2	no	0	0	0	0	0	0	0	0	0	0
EOG090C011Z	ENSGACG00000009631	erythroid differentiation regulatory factor 1	ENSONIG00000000507	erythroid differentiation regulatory factor 1	edrf1	erythroid differentiation regulatory factor 1	1	1	no	0	0	0	0	0	0	0	0	0	0
EOG090C04QT	ENSGACG00000011856	atlastin GTPase 1	ENSONIG00000000509	Similarity:Contains GB1/RHD3-type G (guanine nucleotide-binding) domain.	atl1	atlastin GTPase 1	1	1	no	0	0	0	0	0	0	0	0	0	0
EOG090C02UE	ENSGACG00000009651	C-terminal binding protein 2a	ENSONIG00000000510	Similarity:Belongs to the D-isomer specific 2-hydroxyacid dehydrogenase family.			1	1	yes	0	0	0	0	0	1	0	0	0	0
EOG090C0BK5	ENSGACG00000013198	proline synthetase co-transcribed homolog (bacterial)	ENSONIG00000000511	Similarity:Belongs to the UPF0001 family.	plpbp	pyridoxal phosphate binding protein	1	1	no	0	0	0	0	0	0	0	0	0	0
EOG090C07QC	ENSGACG00000004106	choline/ethanolamine phosphotransferase 1b	ENSONIG00000000512	Similarity:Belongs to the CDP-alcohol phosphatidyltransferase class-I family.	cept1b	choline/ethanolamine phosphotransferase 1	1	1	no	0	0	0	0	0	0	0	0	0	0
EOG090C02PR	ENSGACG00000011162	DEAD (Asp-Glu-Ala-Asp) box helicase 1	ENSONIG00000000513	DEAD (Asp-Glu-Ala-Asp) box helicase 1	ddx1	DEAD (Asp-Glu-Ala-Asp) box helicase 1	1	1	no	0	0	0	0	0	0	0	0	0	0
EOG090C07TQ	ENSGACG00000011862	salvador family WW domain containing protein 1	ENSONIG00000000514	salvador family WW domain containing protein 1	sav1	salvador family WW domain containing protein 1	1	1	no	0	0	0	0	0	0	0	0	0	0
EOG090C02XE	ENSGACG00000002597;ENSGACG00000009658	zinc finger, RAN-binding domain containing 1 ;zinc finger, RAN-binding domain containing 1a	ENSONIG00000000515;ENSONIG00000016016	zinc finger, RAN-binding domain containing 1a ;zinc finger, RAN-binding domain containing 1	ZRANB1 (1 of many);zranb1b	ubiquitin thioesterase ZRANB1 ;zinc finger, RAN-binding domain containing 1b	2	2	no	0	0	0	0	0	0	0	0	0	0
EOG090C00B3	ENSGACG00000011867	ninein (GSK3B interacting protein)	ENSONIG00000000516	ninein (GSK3B interacting protein)	nin	ninein	1	1	no	0	0	0	0	0	0	0	0	0	0
EOG090C0C36	ENSGACG00000004138	DNA-damage regulated autophagy modulator 2b	ENSONIG00000000517	Transmembrane:Helical	dram2b	DNA damage regulated autophagy modulator 2	1	1	no	0	0	0	0	0	0	0	0	0	0
EOG090C0DI3	ENSGACG00000013176	transmembrane emp24 protein transport domain containing 4	ENSONIG00000000518	Similarity:Belongs to the EMP24/GP25L family.	tmed4	transmembrane p24 trafficking protein 4	1	1	no	0	0	0	0	0	0	0	0	0	0
EOG090C084H	ENSGACG00000009665	family with sequence similarity 175, member B	ENSONIG00000000519	family with sequence similarity 175, member B	abraxas2	abraxas 2, BRISC complex subunit	1	1	no	0	0	0	0	0	0	0	0	0	0
EOG090C05X2	ENSGACG00000013173	inhibitor of kappa light polypeptide gene enhancer in B-cells, kinase gamma	ENSONIG00000000520	inhibitor of kappa light polypeptide gene enhancer in B-cells, kinase gamma	ikbkg	inhibitor of kappa light polypeptide gene enhancer in B-cells, kinase gamma	1	1	no	0	0	0	0	0	0	0	0	0	0
EOG090C09OD	ENSGACG00000004147	chromosome 6 open reading frame 89	ENSONIG00000000521	Transmembrane:Helical	zgc:162255	linkage group 5 C6orf89 homolog	1	1	no	0	0	0	0	0	0	0	0	0	0
EOG090C0DN8	ENSGACG00000009677	methyltransferase like 10	ENSONIG00000000522	methyltransferase like 10	eef1akmt2	EEF1A lysine methyltransferase 2	1	1	no	0	0	0	0	0	0	0	0	0	0
EOG090C07TM	ENSGACG00000004151	NFS1 cysteine desulfurase	ENSONIG00000000523	NFS1 cysteine desulfurase	nfs1	NFS1, cysteine desulfurase	1	1	no	0	0	0	0	0	0	0	0	0	0
EOG090C09YV	ENSGACG00000009695	family with sequence similarity 53, member B	ENSONIG00000000524	family with sequence similarity 53, member B	FAM53B	family with sequence similarity 53 member B	1	1	yes	0	0	0	0	0	1	0	0	0	0
EOG090C0A3P	ENSGACG00000013165	\N	ENSONIG00000000525	AIR synthase-related protein, C-terminal domain	sephs2	selenophosphate synthetase 2	1	1	no	0	0	0	0	0	0	0	0	0	0
EOG090C0BDK	ENSGACG00000009698	NK1 transcription factor related 2-like,a	ENSONIG00000000526	Similarity:Contains homeobox DNA-binding domain.	nkx1.2la	NK1 transcription factor related 2-like,a	1	1	no	0	0	0	0	0	0	0	0	0	0
EOG090C05FF	ENSGACG00000009700	carbohydrate (N-acetylgalactosamine 4-sulfate 6-O) sulfotransferase 15	ENSONIG00000000527	Sulfotransferase			1	1	yes	0	0	0	0	0	0	0	0	1	0
EOG090C0A0Y	ENSGACG00000002532;ENSGACG00000009708	G protein-coupled receptor 26 ;G protein-coupled receptor 26	ENSONIG00000000528;ENSONIG00000016030	Transmembrane:Helical;Transmembrane:Helical	gpr26;GPR26 (1 of many)	G-protein coupled receptor 26 ;G-protein coupled receptor 26	2	2	no	0	0	0	0	0	0	0	0	0	0
EOG090C05ZU	ENSGACG00000013155	adaptor-related protein complex 4, beta 1 subunit	ENSONIG00000000529	AP complex subunit beta	ap4b1	adaptor related protein complex 4 subunit beta 1	1	1	no	0	0	0	0	0	0	0	0	0	0
EOG090C0DC4	ENSGACG00000009712	H6 family homeobox 2	ENSONIG00000000530	Similarity:Contains homeobox DNA-binding domain.	hmx2	H6 family homeobox 2	1	1	no	0	0	0	0	0	0	0	0	0	0
EOG090C09OF	ENSGACG00000011876	abhydrolase domain containing 12B	ENSONIG00000000531	Transmembrane:Helical		abhydrolase domain containing 12B	1	1	no	0	0	0	0	0	0	0	0	0	0
EOG090C0BXO	ENSGACG00000009716	H6 family homeobox 3a	ENSONIG00000000532	Similarity:Contains homeobox DNA-binding domain.	hmx3a	homeobox protein HMX3-A	1	1	no	0	0	0	0	0	0	0	0	0	0
EOG090C07HF	ENSGACG00000009720	IKAROS family zinc finger 5	ENSONIG00000000533	IKAROS family zinc finger 5	ikzf5	zinc finger protein Pegasus	1	1	no	0	0	0	0	0	0	0	0	0	0
EOG090C028Q	ENSGACG00000011880	phosphorylase, glycogen, liver	ENSONIG00000000534	Alpha-1,4 glucan phosphorylase	pygl	phosphorylase, glycogen, liver	1	1	no	0	0	0	0	0	0	0	0	0	0
EOG090C00OE	ENSGACG00000011256	intersectin 2a	ENSONIG00000000536;ENSONIG00000017109	Similarity:Contains 1 C2 domain.;Similarity:Contains 1 C2 domain.	itsn2a;itsn2b	intersectin 2 ;intersectin 2b	1	2	no	0	0	0	0	0	0	0	0	0	0
EOG090C08BI	ENSGACG00000009742	angiotensinogen	ENSONIG00000000537	Similarity:Belongs to the serpin family.	agt	angiotensinogen	1	1	no	0	0	0	0	0	0	0	0	0	0
EOG090C06AI	ENSGACG00000004205	copine I	ENSONIG00000000538	Similarity:Contains 1 C2 domain.	cpne1	copine 1	1	1	no	0	0	0	0	0	0	0	0	0	0
EOG090C076X	ENSGACG00000013153	zgc:101663	ENSONIG00000000539	zgc:101663		alpha-1,3-mannosyl-glycoprotein 4-beta-N-acetylglucosaminyltransferase C	1	1	yes	0	0	0	0	1	0	0	0	0	0
EOG090C0CM9	ENSGACG00000013143	family with sequence similarity 58, member A	ENSONIG00000000540	Similarity:Belongs to the cyclin family.	ccnq	cyclin Q	1	1	no	0	0	0	0	0	0	0	0	0	0
EOG090C03VZ	ENSGACG00000009756	component of oligomeric golgi complex 2	ENSONIG00000000541	component of oligomeric golgi complex 2	cog2	component of oligomeric golgi complex 2	1	1	no	0	0	0	0	0	0	0	0	0	0
EOG090C0FNB	ENSGACG00000001093	signal recognition particle 19	ENSONIG00000000542	signal recognition particle 19	srp19	signal recognition particle 19	1	1	no	0	0	0	0	0	0	0	0	0	0
EOG090C01FB	ENSGACG00000013136	ATPase, Ca++ transporting, plasma membrane 3b	ENSONIG00000000543	Calcium-transporting ATPase			1	1	no	0	0	0	0	0	0	0	0	0	0
EOG090C0CWH	ENSGACG00000001092	radial spoke head 14 homolog (Chlamydomonas)	ENSONIG00000000544	radial spoke head 14 homolog (Chlamydomonas)			1	1	no	0	0	0	0	0	0	0	0	0	0
EOG090C06NX	ENSGACG00000009797	piggyBac transposable element derived 5	ENSONIG00000000545	piggyBac transposable element derived 5	pgbd5	piggyBac transposable element derived 5	1	1	yes	0	0	0	0	0	0	0	0	1	0
EOG090C0B1O	ENSGACG00000001091	dematin actin binding protein	ENSONIG00000000546;ENSONIG00000012554	dematin actin binding protein ;Putative adherens-junction anchoring domain	;dmtn	;dematin actin binding protein	1	2	no	0	0	0	0	0	0	0	0	0	0
EOG090C00VN	ENSGACG00000004211	fer-1-like family member 4	ENSONIG00000000548	Similarity:Contains 5 C2 domains.	fer1l4	fer-1-like family member 4	1	1	no	0	0	0	0	0	0	0	0	0	0
EOG090C02VJ	ENSGACG00000011995	tripartite motif containing 9	ENSONIG00000000549	Similarity:Contains B30.2/SPRY domain.	trim9	tripartite motif containing 9	1	1	no	0	0	0	0	0	0	0	0	0	0
EOG090C03WY	ENSGACG00000009800	progesterone immunomodulatory binding factor 1	ENSONIG00000000550	progesterone immunomodulatory binding factor 1	pibf1	progesterone immunomodulatory binding factor 1	1	1	no	0	0	0	0	0	0	0	0	0	0
EOG090C04W9	ENSGACG00000013449	si:ch73-21k16.5	ENSONIG00000000551;ENSONIG00000002097	si:ch73-21k16.5 ;si:ch73-21k16.5	si:ch73-21k16.5;	si:ch73-21k16.5 ;	1	2	no	0	0	0	0	0	0	0	0	0	0
EOG090C0C8Z	ENSGACG00000012000	thioredoxin-related transmembrane protein 1	ENSONIG00000000553	Similarity:Contains 1 thioredoxin domain.	tmx1	thioredoxin-related transmembrane protein 1	1	1	no	0	0	0	0	0	0	0	0	0	0
EOG090C02AC	ENSGACG00000013437;ENSGACG00000016288	lipin 1 ;lipin 1	ENSONIG00000000554;ENSONIG00000017171	lipin 1 ;lipin 1	si:ch73-21k16.1;lpin1	lipin 1 ;lipin 1	2	2	yes	0	0	0	0	1	0	0	1	0	0
EOG090C01X0	ENSGACG00000009812	DIS3 exosome endoribonuclease and 3'-5' exoribonuclease	ENSONIG00000000555	Similarity:Belongs to the RNR ribonuclease family.	dis3	DIS3 exosome endoribonuclease and 3'-5' exoribonuclease	1	1	no	0	0	0	0	0	0	0	0	0	0
EOG090C0502	ENSGACG00000012008	FERM domain containing 6	ENSONIG00000000556	Similarity:Contains FERM domain.	frmd6	FERM domain containing 6	1	1	no	0	0	0	0	0	0	0	0	0	0
EOG090C0CUA	ENSGACG00000001087	\N	ENSONIG00000000558	Similarity:Belongs to the small GTPase superfamily. Rab family.		ras-related protein Rab-14	1	1	no	0	0	0	0	0	0	0	0	0	0
EOG090C0GPW	ENSGACG00000012013	guanine nucleotide binding protein (G protein), gamma 2	ENSONIG00000000559	Guanine nucleotide-binding protein subunit gamma	gng2	G protein subunit gamma 2	1	1	no	0	0	0	0	0	0	0	0	0	0
EOG090C0D0Z	ENSGACG00000001081	MAK16 homolog (S. cerevisiae)	ENSONIG00000000560	MAK16 homolog (S. cerevisiae)	mak16	MAK16 homolog	1	1	no	0	0	0	0	0	0	0	0	0	0
EOG090C0F0Z	ENSGACG00000011759	dual specificity phosphatase 23a	ENSONIG00000000561	dual specificity phosphatase 23a	dusp23a	dual specificity phosphatase 23	1	1	no	0	0	0	0	0	0	0	0	0	0
EOG090C05H7	ENSGACG00000009876	bora, aurora kinase A activator	ENSONIG00000000563	bora, aurora kinase A activator	bora	bora, aurora kinase A activator	1	1	no	0	0	0	0	0	0	0	0	0	0
EOG090C075S	ENSGACG00000011747	taxilin beta b	ENSONIG00000000564	taxilin beta b	txlnbb	taxilin beta b	1	1	no	0	0	0	0	0	0	0	0	0	0
EOG090C0B5R	ENSGACG00000004239	ST3 beta-galactoside alpha-2,3-sialyltransferase 8	ENSONIG00000000565	ST3 beta-galactoside alpha-2,3-sialyltransferase 8	st3gal8	ST3 beta-galactoside alpha-2,3-sialyltransferase 8	1	1	no	0	0	0	0	0	0	0	0	0	0
EOG090C0BBR	ENSGACG00000018280	\N	ENSONIG00000000566;ENSONIG00000012670	Uncharacterized protein ;Uncharacterized protein	spina;	spindlin-1 ;	1	2	no	0	0	0	0	0	0	0	0	0	0
EOG090C00FZ	ENSGACG00000011743	human immunodeficiency virus type I enhancer binding protein 2	ENSONIG00000000567	human immunodeficiency virus type I enhancer binding protein 2	hivep2b	human immunodeficiency virus type I enhancer binding protein 2b	1	1	no	0	0	0	0	0	0	0	0	0	0
EOG090C05RU	ENSGACG00000009894	dachshund d	ENSONIG00000000568	dachshund d	dachc	dachshund homolog 1	1	1	no	0	0	0	0	0	0	0	0	0	0
EOG090C05W9	ENSGACG00000011736	fucosidase, alpha-L- 2, plasma	ENSONIG00000000569	fucosidase, alpha-L- 2, plasma	fuca2	alpha-L-fucosidase 2	1	1	no	0	0	0	0	0	0	0	0	0	0
EOG090C0610	ENSGACG00000013427	G patch domain containing 2	ENSONIG00000000570	Similarity:Contains G-patch domain.	si:ch73-21k16.4	G-patch domain containing 2	1	1	no	0	0	0	0	0	0	0	0	0	0
EOG090C0AJ6	ENSGACG00000004249	ssu-2 homolog, related sequence 1	ENSONIG00000000571	ssu-2 homolog, related sequence 1			1	1	no	0	0	0	0	0	0	0	0	0	0
EOG090C0868	ENSGACG00000001078	si:ch211-87m7.2	ENSONIG00000000572	Transmembrane:Helical	si:ch211-87m7.2	si:ch211-87m7.2	1	1	no	0	0	0	0	0	0	0	0	0	0
EOG090C0B3N	ENSGACG00000004262	RAS (RAD and GEM)-like GTP-binding 1	ENSONIG00000000574	RAS (RAD and GEM)-like GTP-binding 1	REM1	RRAD and GEM like GTPase 1	1	1	no	0	0	0	0	0	0	0	0	0	0
EOG090C04EB	ENSGACG00000011714	aarF domain containing kinase 3	ENSONIG00000000575	aarF domain containing kinase 3	si:dkey-36g24.3	atypical kinase COQ8A, mitochondrial	1	1	yes	0	0	0	0	0	0	1	0	0	1
EOG090C00KB	ENSGACG00000000704	zonadhesin (gene/pseudogene)	ENSONIG00000000576	zonadhesin (gene/pseudogene)			1	1	no	0	0	0	0	0	0	0	0	0	0
EOG090C0ADE	ENSGACG00000004277	purine nucleoside phosphorylase 4a	ENSONIG00000000577	Inosine-guanosine phosphorylase	pnp4a	purine nucleoside phosphorylase 4a	1	1	no	0	0	0	0	0	0	0	0	0	0
EOG090C0A1S	ENSGACG00000001076	leucine rich repeat containing 2	ENSONIG00000000578	leucine rich repeat containing 2			1	1	no	0	0	0	0	0	0	0	0	0	0
EOG090C0AX5	ENSGACG00000009901	UBA domain containing 2	ENSONIG00000000579	Transmembrane:Helical	ubac2	UBA domain containing 2	1	1	no	0	0	0	0	0	0	0	0	0	0
EOG090C0EX0	ENSGACG00000013424	si:ch211-57i17.5	ENSONIG00000000580	si:ch211-57i17.5	si:ch211-57i17.5	usherin	1	1	no	0	0	0	0	0	0	0	0	0	0
EOG090C0B98	ENSGACG00000007141;ENSGACG00000013413	fasciculation and elongation protein zeta 2 (zygin II) ;fasciculation and elongation protein zeta 2 (zygin II)	ENSONIG00000000581;ENSONIG00000006796	fasciculation and elongation protein zeta 2 (zygin II) ;fasciculation and elongation protein zeta 2 (zygin II)	si:ch211-57i17.1;si:dkey-288i20.2	si:ch211-57i17.1 ;fasciculation and elongation protein zeta-2	2	2	no	0	0	0	0	0	0	0	0	0	0
EOG090C09CQ	ENSGACG00000004291	tribbles pseudokinase 3	ENSONIG00000000582	tribbles pseudokinase 3	trib3	tribbles homolog 2	1	1	no	0	0	0	0	0	0	0	0	0	0
EOG090C001N	ENSGACG00000009908	ankyrin 3a	ENSONIG00000000583	Similarity:Contains 23 ANK repeats.	ank3a	ankyrin 3a	1	1	yes	0	0	0	0	0	0	0	0	1	0
EOG090C049W	ENSGACG00000004295	ATR interacting protein	ENSONIG00000000584	ATR interacting protein			1	1	no	0	0	0	0	0	0	0	0	0	0
EOG090C0AUQ	ENSGACG00000011710	\N	ENSONIG00000000586	Transmembrane:Helical			1	1	no	0	0	0	0	0	0	0	0	0	0
EOG090C05FK	ENSGACG00000000701	chromosome 7 open reading frame 43	ENSONIG00000000587	chromosome 7 open reading frame 43	si:dkey-3k24.5	si:dkey-3k24.5	1	1	no	0	0	0	0	0	0	0	0	0	0
EOG090C058P	ENSGACG00000013403	WD repeat domain 26b	ENSONIG00000000588;ENSONIG00000016524	Similarity:Contains CTLH domain.;Similarity:Contains CTLH domain.	wdr26b;wdr26a	WD repeat-containing protein 26 ;WD repeat domain 26a	1	2	no	0	0	0	0	0	0	0	0	0	0
EOG090C01AB	ENSGACG00000001096	excision repair cross-complementation group 6-like	ENSONIG00000000589	excision repair cross-complementation group 6-like	ercc6l	excision repair cross-complementation group 6-like	1	1	no	0	0	0	0	0	0	0	0	0	0
EOG090C01RC	ENSGACG00000000231;ENSGACG00000001103;ENSGACG00000008169	oxoglutarate (alpha-ketoglutarate) dehydrogenase a (lipoamide) ;oxoglutarate (alpha-ketoglutarate) dehydrogenase b (lipoamide) ;oxoglutarate dehydrogenase-like	ENSONIG00000000590;ENSONIG00000011491;ENSONIG00000018484	oxoglutarate (alpha-ketoglutarate) dehydrogenase b (lipoamide) ;oxoglutarate (alpha-ketoglutarate) dehydrogenase a (lipoamide) ;oxoglutarate dehydrogenase-like	ogdhb;;ogdhl	oxoglutarate (alpha-ketoglutarate) dehydrogenase b (lipoamide) ;oxoglutarate dehydrogenase ;oxoglutarate dehydrogenase like	3	3	no	0	0	0	0	0	0	0	0	0	0
EOG090C0EEM	ENSGACG00000004308;ENSGACG00000004312;ENSGACG00000004316;ENSGACG00000004322;ENSGACG00000004326;ENSGACG00000004327;ENSGACG00000004330	hes family bHLH transcription factor 5 ;hes family bHLH transcription factor 5 ;hes family bHLH transcription factor 5 ;hes family bHLH transcription factor 5 ;hes family bHLH transcription factor 5 ;hes family bHLH transcription factor 5 ;hes family bHLH transcription factor 5	ENSONIG00000000591;ENSONIG00000000592	Similarity:Contains 1 basic helix-loop-helix (bHLH) domain.;Similarity:Contains 1 basic helix-loop-helix (bHLH) domain.	;	;	7	2	yes	0	0	0	0	0	0	1	0	0	1
EOG090C06W3	ENSGACG00000000698	galactose-3-O-sulfotransferase 4	ENSONIG00000000593	galactose-3-O-sulfotransferase 4	gal3st4	galactose-3-O-sulfotransferase 4	1	1	no	0	0	0	0	0	0	0	0	0	0
EOG090C02QP	ENSGACG00000004331	pantothenate kinase 4	ENSONIG00000000594	pantothenate kinase 4	pank4	pantothenate kinase 4	1	1	no	0	0	0	0	0	0	0	0	0	0
EOG090C0DVH	ENSGACG00000020084	zgc:172079	ENSONIG00000000595	Similarity:Belongs to the G-protein coupled receptor 1 family.	zgc:172079	lysophosphatidic acid receptor 6	1	1	no	0	0	0	0	0	0	0	0	0	0
EOG090C0DJW	ENSGACG00000020082	metallo-beta-lactamase domain containing 1	ENSONIG00000000596	metallo-beta-lactamase domain containing 1	mblac1	metallo-beta-lactamase domain containing 1	1	1	no	0	0	0	0	0	0	0	0	0	0
EOG090C0DXS	ENSGACG00000011704	DnaJ (Hsp40) homolog, subfamily C, member 5 gamma b	ENSONIG00000000597	DnaJ (Hsp40) homolog, subfamily C, member 5 gamma b	dnajc5gb	DnaJ (Hsp40) homolog, subfamily C, member 5 gamma b	1	1	no	0	0	0	0	0	0	0	0	0	0
EOG090C0CWR	ENSGACG00000020078	mannose-P-dolichol utilization defect 1b	ENSONIG00000000598	Transmembrane:Helical	MPDU1	mannose-P-dolichol utilization defect 1	1	1	no	0	0	0	0	0	0	0	0	0	0
EOG090C01FK	ENSGACG00000013394	adenylate cyclase 3b	ENSONIG00000000599	Similarity:Belongs to the adenylyl cyclase class-4/guanylyl cyclase family.	adcy3b	adenylate cyclase type 3	1	1	no	0	0	0	0	0	0	0	0	0	0
EOG090C08S6	ENSGACG00000011698	tumor protein p53 inducible protein 3	ENSONIG00000000600	tumor protein p53 inducible protein 3	TP53I3	tumor protein p53 inducible protein 3	1	1	yes	0	0	0	0	0	1	0	0	1	0
EOG090C0BKA	ENSGACG00000020077	SRY (sex determining region Y)-box 19b	ENSONIG00000000602	Uncharacterized protein	sox19b	SRY (sex determining region Y)-box 19b	1	1	no	0	0	0	0	0	0	0	0	0	0
EOG090C06UY	ENSGACG00000013389;ENSGACG00000014083	N-acetylgalactosaminidase, alpha ;N-acetylgalactosaminidase, alpha-	ENSONIG00000000603	Similarity:Belongs to the glycosyl hydrolase 27 family.	naga	alpha-N-acetylgalactosaminidase	2	1	no	0	0	0	0	0	0	0	0	0	0
EOG090C041U	ENSGACG00000011683	solute carrier family 5 (sodium/multivitamin and iodide cotransporter), member 6	ENSONIG00000000604	Similarity:Belongs to the sodium:solute symporter (SSF) (TC 2.A.21) family.	slc5a6b	sodium-dependent multivitamin transporter	1	1	no	0	0	0	0	0	0	0	0	0	0
EOG090C0AP3	ENSGACG00000004342	dorsal inhibitory axon guidance protein	ENSONIG00000000605	Dorsal inhibitory axon guidance protein	draxin	dorsal inhibitory axon guidance protein	1	1	no	0	0	0	0	0	0	0	0	0	0
EOG090C08AB	ENSGACG00000016054;ENSGACG00000020072	eukaryotic translation initiation factor 4A, isoform 2 ;eukaryotic translation initiation factor 4A1B	ENSONIG00000000606;ENSONIG00000010685	Similarity:Belongs to the DEAD box helicase family.;Similarity:Belongs to the DEAD box helicase family.	eif4a1a;eif4a2	eukaryotic initiation factor 4A-I ;eukaryotic translation initiation factor 4A2	2	2	no	0	0	0	0	0	0	0	0	0	0
EOG090C09BB	ENSGACG00000009958	coiled-coil domain containing 6a	ENSONIG00000000607	coiled-coil domain containing 6a	ccdc6a	coiled-coil domain containing 6	1	1	no	0	0	0	0	0	0	0	0	0	0
EOG090C0CX8	ENSGACG00000013370	mitochondrial ribosomal protein S18A	ENSONIG00000000609	mitochondrial ribosomal protein S18A	mrps18a	mitochondrial ribosomal protein S18A	1	1	no	0	0	0	0	0	0	0	0	0	0
EOG090C06TV	ENSGACG00000009969	solute carrier family 16, member 9a	ENSONIG00000000610	Transmembrane:Helical	slc16a9a	solute carrier family 16 member 9	1	1	no	0	0	0	0	0	0	0	0	0	0
EOG090C0AY1	ENSGACG00000013363	radial spoke head 9 homolog	ENSONIG00000000611	radial spoke head 9 homolog	rsph9	radial spoke head 9 homolog	1	1	no	0	0	0	0	0	0	0	0	0	0
EOG090C03XH	ENSGACG00000004352	ring finger protein 207a	ENSONIG00000000612	Similarity:Contains RING-type zinc finger.	RNF207	ring finger protein 207	1	1	no	0	0	0	0	0	0	0	0	0	0
EOG090C01X8	ENSGACG00000010005	family with sequence similarity 13, member C	ENSONIG00000000613	family with sequence similarity 13, member C			1	1	no	0	0	0	0	0	0	0	0	0	0
EOG090C03PD	ENSGACG00000013356	transmembrane protein 63A	ENSONIG00000000614	Transmembrane:Helical	tmem63a	CSC1-like protein 1	1	1	no	0	0	0	0	0	0	0	0	0	0
EOG090C0GK9	ENSGACG00000004372;ENSGACG00000013304	ribosomal protein L22 ;ribosomal protein L22	ENSONIG00000000615;ENSONIG00000017987	ribosomal protein L22 ;ribosomal protein L22	rpl22;	ribosomal protein L22 ;60S ribosomal protein L22	2	2	yes	0	2	0	0	0	0	0	0	0	0
EOG090C07B2	ENSGACG00000000867	leucine-rich repeats and calponin homology (CH) domain containing 4	ENSONIG00000000617	Transmembrane:Helical	lrch4	leucine rich repeats and calponin homology domain containing 4	1	1	no	0	0	0	0	0	0	0	0	0	0
EOG090C08D1	ENSGACG00000010033	\N	ENSONIG00000000618	Fibronectin type III	phyhipla	phytanoyl-CoA 2-hydroxylase interacting protein like	1	1	no	0	0	0	0	0	0	0	0	0	0
EOG090C02HJ	ENSGACG00000010043	BicC family RNA binding protein 1a	ENSONIG00000000620	Similarity:Contains 2 KH domains.	bicc1a	BicC family RNA binding protein 1	1	1	no	0	0	0	0	0	0	0	0	0	0
EOG090C0FZA	ENSGACG00000000870;ENSGACG00000014618	H2A histone family, member Z ;H2A histone family, member Va	ENSONIG00000000622;ENSONIG00000013769	Histone H2A;Histone H2A	H2AFZ;h2afva	histone H2A.Z ;histone H2A.V	2	2	no	0	0	0	0	0	0	0	0	0	0
EOG090C02S1	ENSGACG00000011677;ENSGACG00000011680	adhesion G protein-coupled receptor F3a ;\N	ENSONIG00000000624	adhesion G protein-coupled receptor F3a	adgrf3a	adhesion G protein-coupled receptor F3a	2	1	no	0	0	0	0	0	0	0	0	0	0
EOG090C02NF	ENSGACG00000011667	structural maintenance of chromosomes 6	ENSONIG00000000625	structural maintenance of chromosomes 6	smc6	structural maintenance of chromosomes protein 6	1	1	no	0	0	0	0	0	0	0	0	0	0
EOG090C0ES1	ENSGACG00000010058	ubiquitin-conjugating enzyme E2D 1a	ENSONIG00000000626	Similarity:Belongs to the ubiquitin-conjugating enzyme family.	ube2d1a	ubiquitin-conjugating enzyme E2 D4	1	1	no	0	0	0	0	0	0	0	0	0	0
EOG090C013O	ENSGACG00000004412	Rho guanine nucleotide exchange factor (GEF) 10-like a	ENSONIG00000000627	Similarity:Contains DH (DBL-homology) domain.	arhgef10la	Rho guanine nucleotide exchange factor (GEF) 10-like a	1	1	no	0	0	0	0	0	0	0	0	0	0
EOG090C0ECN	ENSGACG00000000860	peptidylprolyl isomerase Ab (cyclophilin A)	ENSONIG00000000629;ENSONIG00000011504	Peptidyl-prolyl cis-trans isomerase;Peptidyl-prolyl cis-trans isomerase	ppiab;	peptidyl-prolyl cis-trans isomerase ;	1	2	yes	0	1	0	0	0	0	0	0	0	0
EOG090C066D	ENSGACG00000010086	regulator of G-protein signaling 7a	ENSONIG00000000630	Similarity:Contains 1 RGS domain.	rgs7a	regulator of G protein signaling 7a	1	1	no	0	0	0	0	0	0	0	0	0	0
EOG090C0BHG	ENSGACG00000013322	cyclin C	ENSONIG00000000631	Similarity:Belongs to the cyclin family.	ccnc	cyclin C	1	1	no	0	0	0	0	0	0	0	0	0	0
EOG090C0DAX	ENSGACG00000004784;ENSGACG00000011662	visinin-like 1a ;visinin-like 1a	ENSONIG00000000633;ENSONIG00000001225	visinin-like 1a ;EF-Hand 1, calcium-binding site	;vsnl1a	visinin-like protein 1 ;visinin-like protein 1	2	2	no	0	0	0	0	0	0	0	0	0	0
EOG090C07QU	ENSGACG00000011655	sex comb on midleg-like 4 (Drosophila)	ENSONIG00000000634	sex comb on midleg-like 4 (Drosophila)	SCML4	sex comb on midleg-like protein 4	1	1	yes	0	0	0	0	0	0	1	0	0	1
EOG090C064A	ENSGACG00000011649	lactation elevated 1a	ENSONIG00000000636	lactation elevated 1a	afg1la	AFG1 like ATPase a	1	1	no	0	0	0	0	0	0	0	0	0	0
EOG090C08R6	ENSGACG00000004433;ENSGACG00000012673	immunoglobin superfamily, member 21a ;immunoglobin superfamily, member 21b	ENSONIG00000000637;ENSONIG00000017309	immunoglobin superfamily, member 21a ;immunoglobin superfamily, member 21b	igsf21a;igsf21b	immunoglobin superfamily, member 21a ;immunoglobulin superfamily member 21	2	2	no	0	0	0	0	0	0	0	0	0	0
EOG090C06VD	ENSGACG00000011645	forkhead box O3A	ENSONIG00000000638	Similarity:Contains fork-head DNA-binding domain.		forkhead box protein O3	1	1	no	0	0	0	0	0	0	0	0	0	0
EOG090C07FC	ENSGACG00000004441	arylacetamide deacetylase-like 4	ENSONIG00000000640	arylacetamide deacetylase-like 4	aadacl4	arylacetamide deacetylase-like 4	1	1	no	0	0	0	0	0	0	0	0	0	0
EOG090C08AA	ENSGACG00000001124;ENSGACG00000014809	\N;TELO2 interacting protein 2	ENSONIG00000000641	TELO2 interacting protein 2			2	1	no	0	0	0	0	0	0	0	0	0	0
EOG090C0A8X	ENSGACG00000004448	dehydrogenase/reductase (SDR family) member 3b	ENSONIG00000000642	Similarity:Belongs to the short-chain dehydrogenases/reductases (SDR) family.	dhrs3b	dehydrogenase/reductase 3	1	1	no	0	0	0	0	0	0	0	0	0	0
EOG090C05DV	ENSGACG00000013313	phosphoglucomutase 3	ENSONIG00000000644	phosphoglucomutase 3	pgm3	phosphoglucomutase 3	1	1	no	0	0	0	0	0	0	0	0	0	0
EOG090C00LP	ENSGACG00000014811	\N	ENSONIG00000000645	Similarity:Contains NTR domain.			1	1	no	0	0	0	0	0	0	0	0	0	0
EOG090C03A1	ENSGACG00000011640	zinc finger and BTB domain containing 24	ENSONIG00000000646	Similarity:Contains 1 BTB (POZ) domain.	zbtb24	zinc finger and BTB domain containing 24	1	1	no	0	0	0	0	0	0	0	0	0	0
EOG090C0AVQ	ENSGACG00000012700	leucine rich repeat containing 38	ENSONIG00000000647	Transmembrane:Helical	lrrc38b	leucine rich repeat containing 38b	1	1	no	0	0	0	0	0	0	0	0	0	0
EOG090C01LH	ENSGACG00000004496;ENSGACG00000012702	eph receptor B2b ;eph receptor B2a	ENSONIG00000000648;ENSONIG00000016953	Receptor protein-tyrosine kinase;Receptor protein-tyrosine kinase	ephb2b;ephb2a	ephrin type-B receptor 2 ;eph receptor B2a	2	2	no	0	0	0	0	0	0	0	0	0	0
EOG090C09CX	ENSGACG00000011625	D-aspartate oxidase	ENSONIG00000000649	D-aspartate oxidase	zgc:172341	D-aspartate oxidase	1	1	no	0	0	0	0	0	0	0	0	0	0
EOG090C0F6I	ENSGACG00000010108	gremlin 2, DAN family BMP antagonist a	ENSONIG00000000650	gremlin 2, DAN family BMP antagonist a	grem2a	gremlin 2, DAN family BMP antagonist a	1	1	no	0	0	0	0	0	0	0	0	0	0
EOG090C00X2	ENSGACG00000010110	formin 2	ENSONIG00000000651	Similarity:Contains FH2 (formin homology 2) domain.			1	1	no	0	0	0	0	0	0	0	0	0	0
EOG090C0DP1	ENSGACG00000011624	sterile alpha motif domain containing 5	ENSONIG00000000652	sterile alpha motif domain containing 5			1	1	no	0	0	0	0	0	0	0	0	0	0
EOG090C000N	ENSGACG00000010126	ryanodine receptor 2b (cardiac)	ENSONIG00000000653	Transmembrane:Helical	ryr2b	ryanodine receptor 2b (cardiac)	1	1	no	0	0	0	0	0	0	0	0	0	0
EOG090C0137	ENSGACG00000011612	syntaxin binding protein 5b (tomosyn)	ENSONIG00000000654	syntaxin binding protein 5b (tomosyn)	stxbp5b	syntaxin binding protein 5b (tomosyn)	1	1	no	0	0	0	0	0	0	0	0	0	0
EOG090C080J	ENSGACG00000013310	si:ch211-214j24.9	ENSONIG00000000655	si:ch211-214j24.9	si:ch211-214j24.9	si:ch211-214j24.9	1	1	no	0	0	0	0	0	0	0	0	0	0
EOG090C0DE9	ENSGACG00000013303	si:dkey-11d18.4	ENSONIG00000000656;ENSONIG00000000657;ENSONIG00000000658;ENSONIG00000000659;ENSONIG00000000660;ENSONIG00000000662;ENSONIG00000020914	Transmembrane:Helical;Transmembrane:Helical;Transmembrane:Helical;Transmembrane:Helical;Transmembrane:Helical;Transmembrane:Helical;Transmembrane:Helical	;;;;;;	;;;;;;leukotriene B4 receptor 1-like	1	7	no	0	0	0	0	0	0	0	0	0	0
EOG090C0A84	ENSGACG00000013306	protease, serine, 35	ENSONIG00000000661	Similarity:Belongs to the peptidase S1 family.			1	1	no	0	0	0	0	0	0	0	0	0	0
EOG090C0789	ENSGACG00000013301	family with sequence similarity 46, member Ab	ENSONIG00000000663	family with sequence similarity 46, member Ab	tent5ab	terminal nucleotidyltransferase 5A	1	1	no	0	0	0	0	0	0	0	0	0	0
EOG090C09XO	ENSGACG00000013275	ELOVL fatty acid elongase 4b	ENSONIG00000000665	Very-long-chain 3-oxoacyl-CoA synthase	elovl4b	elongation of very long chain fatty acids protein 4	1	1	no	0	0	0	0	0	0	0	0	0	0
EOG090C05S5	ENSGACG00000000957	far upstream element (FUSE) binding protein 3	ENSONIG00000000666	Similarity:Contains 4 KH domains.			1	1	no	0	0	0	0	0	0	0	0	0	0
EOG090C04ST	ENSGACG00000006121;ENSGACG00000013271	SOGA family member 3a ;SOGA family member 3b	ENSONIG00000000667;ENSONIG00000007213	Transmembrane:Helical;Transmembrane:Helical	soga3b;soga3a	SOGA family member 3b ;SOGA family member 3a	2	2	yes	0	0	0	0	0	0	0	0	1	0
EOG090C018E	ENSGACG00000011598;ENSGACG00000011646	glutamate receptor, metabotropic 1b ;glutamate receptor, metabotropic 1a	ENSONIG00000000669;ENSONIG00000013404	Transmembrane:Helical;Transmembrane:Helical	grm1b;grm1a	metabotropic glutamate receptor 1 ;glutamate receptor, metabotropic 1a	2	2	yes	0	0	0	0	0	0	0	0	0	1
EOG090C0DY2	ENSGACG00000013262	HD domain containing 2	ENSONIG00000000671	HD domain containing 2	hddc2	HD domain containing 2	1	1	no	0	0	0	0	0	0	0	0	0	0
EOG090C0AWI	ENSGACG00000013254	tumor protein D52-like 1	ENSONIG00000000672	tumor protein D52-like 1	tpd52l1	tpd52 like 1	1	1	yes	0	0	0	0	0	1	0	0	0	0
EOG090C0ATW	ENSGACG00000013252	ring finger protein 217	ENSONIG00000000673	Transmembrane:Helical	rnf217	ring finger protein 217	1	1	no	0	0	0	0	0	0	0	0	0	0
EOG090C0CUN	ENSGACG00000013248	Na+/K+ transporting ATPase interacting 2	ENSONIG00000000674	Transmembrane:Helical	nkain2	sodium/potassium transporting ATPase interacting 2	1	1	no	0	0	0	0	0	0	0	0	0	0
EOG090C04WU	ENSGACG00000004509	lactamase, beta-like 1b	ENSONIG00000000675	lactamase, beta-like 1b	lactbl1b	lactamase, beta-like 1b	1	1	yes	0	0	0	0	0	1	0	0	0	0
EOG090C08V5	ENSGACG00000004514	si:ch211-220m17.6	ENSONIG00000000676	Similarity:Belongs to the G-protein coupled receptor 1 family.	nmur3	neuromedin-U receptor 2	1	1	no	0	0	0	0	0	0	0	0	0	0
EOG090C0FH1	ENSGACG00000013240	triadin	ENSONIG00000000678	Transmembrane:Helical			1	1	no	0	0	0	0	0	0	0	0	0	0
EOG090C07H8	ENSGACG00000013213	A kinase (PRKA) anchor protein 7	ENSONIG00000000680	A kinase (PRKA) anchor protein 7			1	1	no	0	0	0	0	0	0	0	0	0	0
EOG090C052A	ENSGACG00000004517	alkaline phosphatase, liver/bone/kidney	ENSONIG00000000682	Alkaline phosphatase	alpl	alkaline phosphatase	1	1	no	0	0	0	0	0	0	0	0	0	0
EOG090C00PT	ENSGACG00000013187	mediator complex subunit 23	ENSONIG00000000683	mediator complex subunit 23	med23	mediator complex subunit 23	1	1	yes	0	0	0	0	1	0	0	1	0	0
EOG090C00G2	ENSGACG00000011582	SNF2 histone linker PHD RING helicase	ENSONIG00000000684	SNF2 histone linker PHD RING helicase	shprh	SNF2 histone linker PHD RING helicase	1	1	no	0	0	0	0	0	0	0	0	0	0
EOG090C0D2V	ENSGACG00000000948	Kazal-type serine peptidase inhibitor domain 3	ENSONIG00000000686	Similarity:Contains IGFBP N-terminal domain.	kazald3	Kazal-type serine peptidase inhibitor domain 3	1	1	no	0	0	0	0	0	0	0	0	0	0
EOG090C03CK	ENSGACG00000011577	F-box protein 30a	ENSONIG00000000687	Similarity:Contains 1 F-box domain.	fbxo30a	F-box only protein 30	1	1	no	0	0	0	0	0	0	0	0	0	0
EOG090C01XB	ENSGACG00000018121	glutamate receptor, ionotropic, N-methyl D-aspartate 1a	ENSONIG00000000689;ENSONIG00000012985	Transmembrane:Helical;Transmembrane:Helical	;grin1a	;glutamate receptor ionotropic, NMDA 1	1	2	yes	0	0	0	0	0	1	0	0	0	0
EOG090C0AYH	ENSGACG00000011566	required for meiotic nuclear division 1 homolog	ENSONIG00000000690	required for meiotic nuclear division 1 homolog	rmnd1	required for meiotic nuclear division 1 homolog	1	1	no	0	0	0	0	0	0	0	0	0	0
EOG090C0EWE	ENSGACG00000013184	interleukin 20 receptor, alpha	ENSONIG00000000691	interleukin 20 receptor, alpha			1	1	no	0	0	0	0	0	0	0	0	0	0
EOG090C0003	ENSGACG00000011511	spectrin repeat containing, nuclear envelope 1b	ENSONIG00000000692	Transmembrane:Helical	syne1b	spectrin repeat containing, nuclear envelope 1b	1	1	no	0	0	0	0	0	0	0	0	0	0
EOG090C05PX	ENSGACG00000013160	EH-domain containing 3	ENSONIG00000000693	Similarity:Contains dynamin-type G (guanine nucleotide-binding) domain.	ehd3	EH domain-containing protein 3	1	1	no	0	0	0	0	0	0	0	0	0	0
EOG090C034R	ENSGACG00000004590	endothelin converting enzyme 1	ENSONIG00000000694	Transmembrane:Helical	ece1	endothelin converting enzyme 1	1	1	no	0	0	0	0	0	0	0	0	0	0
EOG090C0FEE	ENSGACG00000013159	chromosome 1 open reading frame 95	ENSONIG00000000695	Transmembrane:Helical	stum	protein stum homolog	1	1	no	0	0	0	0	0	0	0	0	0	0
EOG090C05KH	ENSGACG00000013145	aarF domain containing kinase 3	ENSONIG00000000696	aarF domain containing kinase 3	coq8a	coenzyme Q8A	1	1	no	0	0	0	0	0	0	0	0	0	0
EOG090C00PM	ENSGACG00000004607	eukaryotic translation initiation factor 4 gamma, 3	ENSONIG00000000697	eukaryotic translation initiation factor 4 gamma, 3	eif4g3a	eukaryotic translation initiation factor 4 gamma, 3a	1	1	no	0	0	0	0	0	0	0	0	0	0
EOG090C03TQ	ENSGACG00000013124	erythrocyte membrane protein band 4.1-like 2	ENSONIG00000000699	Similarity:Contains FERM domain.	EPB41L2	erythrocyte membrane protein band 4.1 like 2	1	1	no	0	0	0	0	0	0	0	0	0	0
EOG090C0AEE	ENSGACG00000000236	docking protein 2	ENSONIG00000000700	Similarity:Contains 1 PH domain.	dok2	docking protein 2	1	1	no	0	0	0	0	0	0	0	0	0	0
EOG090C02HS	ENSGACG00000001642	tuberous sclerosis 1a	ENSONIG00000000701	Transmembrane:Helical	TSC1 (1 of many)	TSC complex subunit 1	1	1	no	0	0	0	0	0	0	0	0	0	0
EOG090C00QA	ENSGACG00000011498	tubby like protein 4b	ENSONIG00000000703	tubby like protein 4b	tulp4b	tubby like protein 4b	1	1	no	0	0	0	0	0	0	0	0	0	0
EOG090C09H4	ENSGACG00000004622	heterochromatin protein 1, binding protein 3	ENSONIG00000000705	Similarity:Belongs to the histone H1/H5 family.	hp1bp3	heterochromatin protein 1, binding protein 3	1	1	no	0	0	0	0	0	0	0	0	0	0
EOG090C08EH	ENSGACG00000011487	solute carrier family 18, subfamily B, member 1	ENSONIG00000000707	Transmembrane:Helical	slc18b1	solute carrier family 18, subfamily B, member 1	1	1	no	0	0	0	0	0	0	0	0	0	0
EOG090C08RW	ENSGACG00000013116	transmembrane protein 200A	ENSONIG00000000708	Transmembrane:Helical	tmem200a	transmembrane protein 200A	1	1	no	0	0	0	0	0	0	0	0	0	0
EOG090C039H	ENSGACG00000004633	kinesin family member 17	ENSONIG00000000709	Kinesin-like protein	kif17	kinesin family member 17	1	1	yes	1	1	0	0	0	0	0	0	0	0
EOG090C017T	ENSGACG00000009821	potassium voltage-gated channel, subfamily H (eag-related), member 6a	ENSONIG00000000710	Similarity:Contains cyclic nucleotide-binding domain.	kcnh6a	potassium voltage-gated channel subfamily H member 6	1	1	no	0	0	0	0	0	0	0	0	0	0
EOG090C0480	ENSGACG00000002278	DEAD (Asp-Glu-Ala-Asp) box polypeptide 31	ENSONIG00000000711	Catalytic Activity:ATP + H(2)O = ADP + phosphate.	ddx31	DEAD-box helicase 31	1	1	no	0	0	0	0	0	0	0	0	0	0
EOG090C02VG	ENSGACG00000011481	Abelson helper integration site 1	ENSONIG00000000712	Similarity:Contains 1 SH3 domain.	ahi1	Abelson helper integration site 1	1	1	no	0	0	0	0	0	0	0	0	0	0
EOG090C0E0O	ENSGACG00000013108	transmembrane protein 244	ENSONIG00000000713	Transmembrane:Helical	tmem244	transmembrane protein 244	1	1	yes	0	0	0	0	0	1	1	0	0	0
EOG090C09YQ	ENSGACG00000013101	FK506 binding protein 6	ENSONIG00000000714	FK506 binding protein 6	fkbp6	FKBP prolyl isomerase 6	1	1	no	0	0	0	0	0	0	0	0	0	0
EOG090C0266	ENSGACG00000010178	actinin, alpha 2b	ENSONIG00000000715	actinin, alpha 2b	actn2b	alpha-actinin-2	1	1	yes	0	0	0	0	0	1	0	0	0	0
EOG090C06OR	ENSGACG00000004645	chromosome 1 open reading frame 116	ENSONIG00000000716	chromosome 1 open reading frame 116			1	1	no	0	0	0	0	0	0	0	0	0	0
EOG090C04A3	ENSGACG00000013092	Rho GTPase activating protein 18	ENSONIG00000000717	Rho GTPase activating protein 18	arhgap18	Rho GTPase activating protein 18	1	1	no	0	0	0	0	0	0	0	0	0	0
EOG090C07IV	ENSGACG00000011476	microtubule-associated protein 7a	ENSONIG00000000719	microtubule-associated protein 7a	map7a	microtubule-associated protein 7a	1	1	no	0	0	0	0	0	0	0	0	0	0
EOG090C0DU8	ENSGACG00000000154	\N	ENSONIG00000000720	Similarity:Contains homeobox DNA-binding domain.	BARHL1 (1 of many)	BarH like homeobox 1	1	1	no	0	0	0	0	0	0	0	0	0	0
EOG090C00EY	ENSGACG00000011463	otoferlin b	ENSONIG00000000721	Similarity:Contains 4 C2 domains.	otofb	otoferlin b	1	1	yes	0	0	0	0	0	0	1	0	0	0
EOG090C03AA	ENSGACG00000013087	sel-1 suppressor of lin-12-like (C. elegans)	ENSONIG00000000722	sel-1 suppressor of lin-12-like (C. elegans)	sel1l	SEL1L, ERAD E3 ligase adaptor subunit	1	1	no	0	0	0	0	0	0	0	0	0	0
EOG090C07FX	ENSGACG00000009804	glial fibrillary acidic protein	ENSONIG00000000724	Similarity:Belongs to the intermediate filament family.	gfap	glial fibrillary acidic protein	1	1	no	0	0	0	0	0	0	0	0	0	0
EOG090C0CP5	ENSGACG00000013068	chromogranin A	ENSONIG00000000725	chromogranin A		chromogranin A	1	1	no	0	0	0	0	0	0	0	0	0	0
EOG090C05OA	ENSGACG00000010731;ENSGACG00000011069	p21 protein (Cdc42/Rac)-activated kinase 2a ;p21 protein (Cdc42/Rac)-activated kinase 2b	ENSONIG00000000726;ENSONIG00000002841	Non-specific serine/threonine protein kinase;Non-specific serine/threonine protein kinase	PAK2;pak2b	p21 (RAC1) activated kinase 2 ;p21 (RAC1) activated kinase 2	2	2	no	0	0	0	0	0	0	0	0	0	0
EOG090C03VQ	ENSGACG00000009795	mitogen-activated protein kinase kinase kinase 3	ENSONIG00000000728	Similarity:Contains PB1 domain.	map3k3	mitogen-activated protein kinase kinase kinase 3	1	1	no	0	0	0	0	0	0	0	0	0	0
EOG090C04VB	ENSGACG00000010511	cerebral cavernous malformation 2-like	ENSONIG00000000732	cerebral cavernous malformation 2-like	ccm2l	CCM2 like scaffold protein	1	1	no	0	0	0	0	0	0	0	0	0	0
EOG090C0E4A	ENSGACG00000013040	syntaxin 7-like	ENSONIG00000000733	Similarity:Belongs to the syntaxin family.	stx7l	syntaxin 7	1	1	no	0	0	0	0	0	0	0	0	0	0
EOG090C03OI	ENSGACG00000009782	DEAD (Asp-Glu-Ala-Asp) box helicase 42	ENSONIG00000000734	Similarity:Belongs to the DEAD box helicase family.	ddx42	DEAD (Asp-Glu-Ala-Asp) box helicase 42	1	1	no	0	0	0	0	0	0	0	0	0	0
EOG090C05D5	ENSGACG00000010506	XK, Kell blood group complex subunit-related family, member 7	ENSONIG00000000735	XK-related protein	xkr7	XK, Kell blood group complex subunit-related family, member 7	1	1	no	0	0	0	0	0	0	0	0	0	0
EOG090C071B	ENSGACG00000000290	cyclin-dependent kinase 16	ENSONIG00000000736	cyclin-dependent kinase 16	cdk16	cyclin-dependent kinase 16	1	1	no	0	0	0	0	0	0	0	0	0	0
EOG090C05SU	ENSGACG00000010233	prolyl 4-hydroxylase, alpha polypeptide I b	ENSONIG00000000737;ENSONIG00000019090	prolyl 4-hydroxylase, alpha polypeptide I b ;prolyl 4-hydroxylase, alpha polypeptide I	p4ha1b;p4ha1a	prolyl 4-hydroxylase subunit alpha 1 ;prolyl 4-hydroxylase, alpha polypeptide I a	1	2	no	0	0	0	0	0	0	0	0	0	0
EOG090C0715	ENSGACG00000009767	ste20-related kinase adaptor alpha	ENSONIG00000000738	ste20-related kinase adaptor alpha	strada	STE20 related adaptor alpha	1	1	no	0	0	0	0	0	0	0	0	0	0
EOG090C09VH	ENSGACG00000013025	chromosome 6 open reading frame 58	ENSONIG00000000739	chromosome 6 open reading frame 58	leg1.2	linkage group 15 C6orf58 homolog	1	1	no	0	0	0	0	0	0	0	0	0	0
EOG090C0206	ENSGACG00000010755	helicase-like transcription factor	ENSONIG00000000740	helicase-like transcription factor	hltf	helicase like transcription factor	1	1	no	0	0	0	0	0	0	0	0	0	0
EOG090C0A59	ENSGACG00000009738	ring finger protein 113A	ENSONIG00000000741	Similarity:Contains RING-type zinc finger.	rnf113a	ring finger protein 113A	1	1	no	0	0	0	0	0	0	0	0	0	0
EOG090C08G7	ENSGACG00000013010	D4, zinc and double PHD fingers, family 3	ENSONIG00000000742	D4, zinc and double PHD fingers, family 3	dpf3	D4, zinc and double PHD fingers, family 3	1	1	no	0	0	0	0	0	0	0	0	0	0
EOG090C045A	ENSGACG00000010249	ecdysoneless homolog (Drosophila)	ENSONIG00000000743	ecdysoneless homolog (Drosophila)	ecd	ecdysoneless cell cycle regulator	1	1	no	0	0	0	0	0	0	0	0	0	0
EOG090C0CBL	ENSGACG00000001178;ENSGACG00000016572	phosphatidic acid phosphatase type 2 domain containing 3 ;phosphatidic acid phosphatase type 2 domain containing 3	ENSONIG00000000744;ENSONIG00000014972	Transmembrane:Helical;Transmembrane:Helical	;PLPP7	;phospholipid phosphatase 7 (inactive)	2	2	no	0	0	0	0	0	0	0	0	0	0
EOG090C05SI	ENSGACG00000012994	WD repeat domain 21	ENSONIG00000000746	WD repeat domain 21	wdr21	DDB1 and CUL4 associated factor 4	1	1	no	0	0	0	0	0	0	0	0	0	0
EOG090C0A3R	ENSGACG00000010772	\N	ENSONIG00000000747	checkpoint kinase 2	chek2	checkpoint kinase 2	1	1	no	0	0	0	0	0	0	0	0	0	0
EOG090C081I	ENSGACG00000007088;ENSGACG00000009722	RUN domain containing 3Ab ;RUN domain containing 3Aa	ENSONIG00000000748;ENSONIG00000011581	Similarity:Contains RUN domain.;Similarity:Contains RUN domain.	RUNDC3A;rundc3ab	RUN domain-containing protein 3A ;RUN domain-containing protein 3A	2	2	no	0	0	0	0	0	0	0	0	0	0
EOG090C08GI	ENSGACG00000003621;ENSGACG00000010760	glycogenin 1b ;glycogenin 1a	ENSONIG00000000749;ENSONIG00000005863	glycogenin 1a ;glycogenin 1b	gyg1a;gyg1b	glycogenin 1a ;glycogenin 1b	2	2	no	0	0	0	0	0	0	0	0	0	0
EOG090C0CGG	ENSGACG00000000295	activator of basal transcription 1	ENSONIG00000000750	activator of basal transcription 1	abt1	activator of basal transcription 1	1	1	no	0	0	0	0	0	0	0	0	0	0
EOG090C04EM	ENSGACG00000010255	family with sequence similarity 149, member B1	ENSONIG00000000751	family with sequence similarity 149, member B1	fam149b1	family with sequence similarity 149 member B1	1	1	no	0	0	0	0	0	0	0	0	0	0
EOG090C03XT	ENSGACG00000010777	plastin 1 (I isoform)	ENSONIG00000000752	plastin 1 (I isoform)	pls1	plastin 1 (I isoform)	1	1	no	0	0	0	0	0	0	0	0	0	0
EOG090C09LR	ENSGACG00000000293	RAD51 paralog C	ENSONIG00000000753	RAD51 paralog C	rad51c	DNA repair protein RAD51 homolog 3	1	1	no	0	0	0	0	0	0	0	0	0	0
EOG090C02MJ	ENSGACG00000012992	zinc finger, FYVE domain containing 1	ENSONIG00000000754	zinc finger, FYVE domain containing 1	zfyve1	zinc finger, FYVE domain containing 1	1	1	no	0	0	0	0	0	0	0	0	0	0
EOG090C026J	ENSGACG00000000297;ENSGACG00000012070	glutamate receptor, metabotropic 6a ;glutamate receptor, metabotropic 6b	ENSONIG00000000755;ENSONIG00000020285	Transmembrane:Helical;Transmembrane:Helical	grm6a;grm6b	glutamate receptor, metabotropic 6a ;metabotropic glutamate receptor 6	2	2	yes	0	0	0	0	0	0	0	0	1	0
EOG090C0CX5	ENSGACG00000010267	DnaJ (Hsp40) homolog, subfamily C, member 9	ENSONIG00000000756	DnaJ (Hsp40) homolog, subfamily C, member 9	dnajc9	DnaJ (Hsp40) homolog, subfamily C, member 9	1	1	no	0	0	0	0	0	0	0	0	0	0
EOG090C0D9R	ENSGACG00000009718	family with sequence similarity 117, member Aa	ENSONIG00000000757	family with sequence similarity 117, member Aa	fam117aa	family with sequence similarity 117 member A	1	1	no	0	0	0	0	0	0	0	0	0	0
EOG090C0AJB	ENSGACG00000009684	solute carrier family 35, member B1	ENSONIG00000000758	Transmembrane:Helical	slc35b1	solute carrier family 35, member B1	1	1	no	0	0	0	0	0	0	0	0	0	0
EOG090C0E5H	ENSGACG00000012982	phosphatidylinositol glycan anchor biosynthesis, class H	ENSONIG00000000759	Transmembrane:Helical	pigh	phosphatidylinositol glycan anchor biosynthesis, class H	1	1	no	0	0	0	0	0	0	0	0	0	0
EOG090C04KJ	ENSGACG00000010286	neuron-derived neurotrophic factor , like	ENSONIG00000000760	neuron-derived neurotrophic factor , like	ndnfl	neuron-derived neurotrophic factor , like	1	1	no	0	0	0	0	0	0	0	0	0	0
EOG090C02AB	ENSGACG00000010290	coiled-coil serine-rich protein 2a	ENSONIG00000000761	coiled-coil serine-rich protein 2a	ccser2a	coiled-coil serine rich protein 2	1	1	no	0	0	0	0	0	0	0	0	0	0
EOG090C0CB7	ENSGACG00000012976	ras homolog family member V	ENSONIG00000000762	Similarity:Belongs to the small GTPase superfamily. Rho family.	rhov	rho-related GTP-binding protein RhoV	1	1	yes	0	0	0	0	0	0	0	1	0	0
EOG090C0D8K	ENSGACG00000000595	TSR2, 20S rRNA accumulation, homolog (S. cerevisiae)	ENSONIG00000000763	TSR2, 20S rRNA accumulation, homolog (S. cerevisiae)	tsr2	TSR2, 20S rRNA accumulation, homolog (S. cerevisiae)	1	1	no	0	0	0	0	0	0	0	0	0	0
EOG090C01LD	ENSGACG00000012969	vacuolar protein sorting 18 homolog (S. cerevisiae)	ENSONIG00000000764	vacuolar protein sorting 18 homolog (S. cerevisiae)	vps18	VPS18, CORVET/HOPS core subunit	1	1	no	0	0	0	0	0	0	0	0	0	0
EOG090C06UJ	ENSGACG00000010670	olfactomedin 1a	ENSONIG00000000765	Similarity:Contains olfactomedin-like domain.			1	1	no	0	0	0	0	0	0	0	0	0	0
EOG090C0GGN	ENSGACG00000007080;ENSGACG00000009661	NADH dehydrogenase (ubiquinone) 1 alpha subcomplex, 4 ;NADH dehydrogenase (ubiquinone) 1 alpha subcomplex 4, like	ENSONIG00000000766	Transmembrane:Helical	ndufa4l	cytochrome c oxidase subunit NDUFA4	2	1	yes	0	0	0	0	1	0	0	1	0	0
EOG090C022Q	ENSGACG00000010300	glutamate receptor, ionotropic, delta 1a	ENSONIG00000000768;ENSONIG00000019059	Transmembrane:Helical;Transmembrane:Helical	grid1a;grid1b	glutamate receptor ionotropic, delta-1 ;glutamate receptor, ionotropic, delta 1b	1	2	no	0	0	0	0	0	0	0	0	0	0
EOG090C02VC	ENSGACG00000000600	SRSF protein kinase 3	ENSONIG00000000769	Similarity:Belongs to the protein kinase superfamily.	SRPK3	SRSF protein kinase 3	1	1	no	0	0	0	0	0	0	0	0	0	0
EOG090C005Q	ENSGACG00000010787	ATR serine/threonine kinase	ENSONIG00000000770	Similarity:Contains FATC domain.	atr	ATR serine/threonine kinase	1	1	yes	0	1	0	0	0	0	0	0	0	0
EOG090C00TQ	ENSGACG00000012960	INO80 complex subunit	ENSONIG00000000772	INO80 complex subunit	ino80	INO80 complex subunit	1	1	no	0	0	0	0	0	0	0	0	0	0
EOG090C0BBW	ENSGACG00000009655	neurexophilin 3	ENSONIG00000000773	Neurexophilin	nxph3	neurexophilin-1	1	1	no	0	0	0	0	0	0	0	0	0	0
EOG090C06GQ	ENSGACG00000010829	\N	ENSONIG00000000774	Similarity:Contains BAR domain.			1	1	no	0	0	0	0	0	0	0	0	0	0
EOG090C09M9	ENSGACG00000009652	nerve growth factor receptor a (TNFR superfamily, member 16)	ENSONIG00000000775	Transmembrane:Helical	ngfra	nerve growth factor receptor a (TNFR superfamily, member 16)	1	1	no	0	0	0	0	0	0	0	0	0	0
EOG090C01RZ	ENSGACG00000010307	wings apart-like homolog a (Drosophila)	ENSONIG00000000777	wings apart-like homolog a (Drosophila)	wapla	WAPL cohesin release factor	1	1	no	0	0	0	0	0	0	0	0	0	0
EOG090C0220	ENSGACG00000007018;ENSGACG00000009622	solute carrier family 4 (anion exchanger), member 1b (Diego blood group) ;solute carrier family 4 (anion exchanger), member 1a (Diego blood group)	ENSONIG00000000778;ENSONIG00000016469	Anion exchange protein;Anion exchange protein	slc4a1a;slc4a1b	band 3 anion exchange protein ;band 3 anion exchange protein	2	2	no	0	0	0	0	0	0	0	0	0	0
EOG090C09NL	ENSGACG00000010835	solute carrier family 35, member G3	ENSONIG00000000779	Transmembrane:Helical			1	1	no	0	0	0	0	0	0	0	0	0	0
EOG090C011W	ENSGACG00000010839	stromal antigen 1a	ENSONIG00000000780	stromal antigen 1a	stag1a	stromal antigen 1	1	1	no	0	0	0	0	0	0	0	0	0	0
EOG090C0DCS	ENSGACG00000012938	ChaC, cation transport regulator homolog 1 (E. coli)	ENSONIG00000000781	ChaC, cation transport regulator homolog 1 (E. coli)	chac1	ChaC glutathione specific gamma-glutamylcyclotransferase 1	1	1	no	0	0	0	0	0	0	0	0	0	0
EOG090C039K	ENSGACG00000012933	delta-like 4 (Drosophila)	ENSONIG00000000782	Delta-like protein	dll4	delta like canonical Notch ligand 4	1	1	no	0	0	0	0	0	0	0	0	0	0
EOG090C00BP	ENSGACG00000000602	plexin B3	ENSONIG00000000783	Similarity:Contains Sema domain.	plxnb3	plexin-B1	1	1	no	0	0	0	0	0	0	0	0	0	0
EOG090C06N4	ENSGACG00000010338;ENSGACG00000014314	HtrA serine peptidase 1a ;HtrA serine peptidase 1a	ENSONIG00000000784;ENSONIG00000019055	Similarity:Contains IGFBP N-terminal domain.;Similarity:Contains IGFBP N-terminal domain.	htra1a;HTRA1	serine protease HTRA1A ;HtrA serine peptidase 1	2	2	no	0	0	0	0	0	0	0	0	0	0
EOG090C0A5W	ENSGACG00000010655	mediator complex subunit 27	ENSONIG00000000785	mediator complex subunit 27	med27	mediator complex subunit 27	1	1	no	0	0	0	0	0	0	0	0	0	0
EOG090C0DYG	ENSGACG00000012931	synapse differentiation inducing 1-like	ENSONIG00000000786	Transmembrane:Helical	syndig1l	synapse differentiation-inducing gene protein 1-like	1	1	yes	0	1	0	0	0	0	0	0	0	0
EOG090C042A	ENSGACG00000012930	vertebrae development associated	ENSONIG00000000787	vertebrae development associated	vrtn	vertebrae development associated	1	1	no	0	0	0	0	0	0	0	0	0	0
EOG090C0AGH	ENSGACG00000009441;ENSGACG00000012925	solute carrier family 25 (mitochondrial carnitine/acylcarnitine carrier), member 29 ;solute carrier family 25 (mitochondrial carnitine/acylcarnitine carrier), member 29	ENSONIG00000000788;ENSONIG00000000920;ENSONIG00000003538	Similarity:Belongs to the mitochondrial carrier (TC 2.A.29) family.;Similarity:Belongs to the mitochondrial carrier (TC 2.A.29) family.;Similarity:Belongs to the mitochondrial carrier (TC 2.A.29) family.	slc25a29;SLC25A29 (1 of many);SLC25A29 (1 of many)	mitochondrial basic amino acids transporter ;solute carrier family 25 member 29 ;solute carrier family 25 member 29	2	3	no	0	0	0	0	0	0	0	0	0	0
EOG090C06A7	ENSGACG00000010651	netrin g2a	ENSONIG00000000789	netrin g2a	ntng2a	netrin g2a	1	1	no	0	0	0	0	0	0	0	0	0	0
EOG090C09CD	ENSGACG00000010343;ENSGACG00000012025	\N;pleckstrin homology domain containing, family A (phosphoinositide binding specific) member 1b	ENSONIG00000000790;ENSONIG00000019056	Similarity:Contains 2 PH domains.;Similarity:Contains 2 PH domains.	plekha1a;plekha1b	pleckstrin homology domain-containing family A member 1 ;pleckstrin homology domain containing, family A (phosphoinositide binding specific) member 1b	2	2	no	0	0	0	0	0	0	0	0	0	0
EOG090C0B1G	ENSGACG00000012923	solute carrier family 25, member 47a	ENSONIG00000000791	Similarity:Belongs to the mitochondrial carrier (TC 2.A.29) family.	slc25a47a	solute carrier family 25 member 47	1	1	no	0	0	0	0	0	0	0	0	0	0
EOG090C0CJZ	ENSGACG00000010633	endonuclease G	ENSONIG00000000792	endonuclease G	endog	endonuclease G	1	1	no	0	0	0	0	0	0	0	0	0	0
EOG090C049R	ENSGACG00000000263	ATP-binding cassette, sub-family D (ALD), member 1	ENSONIG00000000793	Similarity:Belongs to the ABC transporter superfamily.	abcd1	ATP-binding cassette sub-family D member 1	1	1	no	0	0	0	0	0	0	0	0	0	0
EOG090C08VF	ENSGACG00000010350	phosphatase and actin regulator 2	ENSONIG00000000794	Phosphatase and actin regulator	phactr2	phosphatase and actin regulator 2	1	1	no	0	0	0	0	0	0	0	0	0	0
EOG090C05WZ	ENSGACG00000009386	protein phosphatase 2, regulatory subunit B', gamma	ENSONIG00000000795;ENSONIG00000003556	protein phosphatase 2, regulatory subunit B', gamma b ;protein phosphatase 2, regulatory subunit B', gamma	ppp2r5cb;PPP2R5C	serine/threonine-protein phosphatase 2A 56 kDa regulatory subunit gamma isoform ;protein phosphatase 2 regulatory subunit B'gamma	1	2	no	0	0	0	0	0	0	0	0	0	0
EOG090C04T8	ENSGACG00000009598	upstream binding transcription factor, RNA polymerase I	ENSONIG00000000796	upstream binding transcription factor, RNA polymerase I	ubtf	upstream binding transcription factor	1	1	no	0	0	0	0	0	0	0	0	0	0
EOG090C04JH	ENSGACG00000010847	propionyl CoA carboxylase, beta polypeptide	ENSONIG00000000798	propionyl CoA carboxylase, beta polypeptide	pccb	propionyl-CoA carboxylase subunit beta	1	1	no	0	0	0	0	0	0	0	0	0	0
EOG090C02CW	ENSGACG00000010613	\N	ENSONIG00000000802	Similarity:Contains 1 PDZ (DHR) domain.			1	1	no	0	0	0	0	0	0	0	0	0	0
EOG090C0AOQ	ENSGACG00000010365	opioid receptor, mu 1	ENSONIG00000000803	Similarity:Belongs to the G-protein coupled receptor 1 family.	oprm1	delta-type opioid receptor	1	1	yes	0	1	0	0	0	0	0	0	0	0
EOG090C0DV3	ENSGACG00000010373	regulator of G-protein signaling 17	ENSONIG00000000804	Similarity:Contains 1 RGS domain.	rgs17	regulator of G-protein signaling 17	1	1	no	0	0	0	0	0	0	0	0	0	0
EOG090C04A0	ENSGACG00000012888	heat shock protein 90, alpha (cytosolic), class A member 1, tandem duplicate 2	ENSONIG00000000805	heat shock protein 90, alpha (cytosolic), class A member 1, tandem duplicate 2	hsp90aa1.2	heat shock protein HSP 90-alpha	1	1	no	0	0	0	0	0	0	0	0	0	0
EOG090C0BH0	ENSGACG00000001142	interleukin-1 receptor-associated kinase 1	ENSONIG00000000806	Similarity:Belongs to the protein kinase superfamily.	irak1	interleukin-1 receptor-associated kinase 1	1	1	no	0	0	0	0	0	0	0	0	0	0
EOG090C06BA	ENSGACG00000010889	male-specific lethal 2 homolog a (Drosophila)	ENSONIG00000000807;ENSONIG00000006643	male-specific lethal 2 homolog a (Drosophila) ;male-specific lethal 2 homolog a (Drosophila)	msl2a;MSL2 (1 of many)	E3 ubiquitin-protein ligase MSL2 ;MSL complex subunit 2	1	2	no	0	0	0	0	0	0	0	0	0	0
EOG090C00BI	ENSGACG00000010377	pecanex-like 2 (Drosophila)	ENSONIG00000000808	Transmembrane:Helical	pcnx2	pecanex 2	1	1	no	0	0	0	0	0	0	0	0	0	0
EOG090C0676	ENSGACG00000000798	methyl CpG binding protein 2	ENSONIG00000000809	methyl CpG binding protein 2	mecp2	methyl CpG binding protein 2	1	1	no	0	0	0	0	0	0	0	0	0	0
EOG090C0BGA	ENSGACG00000010895	tumor necrosis factor (ligand) superfamily, member 10	ENSONIG00000000810	tumor necrosis factor (ligand) superfamily, member 10		tumor necrosis factor ligand superfamily member 10	1	1	no	0	0	0	0	0	0	0	0	0	0
EOG090C079W	ENSGACG00000010691	fibrinogen C domain containing 1	ENSONIG00000000811	Similarity:Contains fibrinogen C-terminal domain.			1	1	yes	0	0	0	0	0	1	0	0	0	0
EOG090C0AWF	ENSGACG00000009590	ataxin 7-like 3	ENSONIG00000000812	SAGA-associated factor 11 homolog	atxn7l3	ataxin 7-like 3	1	1	no	0	0	0	0	0	0	0	0	0	0
EOG090C0AUU	ENSGACG00000001709;ENSGACG00000010923	neutral cholesterol ester hydrolase 1b ;neutral cholesterol ester hydrolase 1a	ENSONIG00000000813;ENSONIG00000006636	neutral cholesterol ester hydrolase 1a ;neutral cholesterol ester hydrolase 1b	nceh1a;	neutral cholesterol ester hydrolase 1 ;neutral cholesterol ester hydrolase 1	2	2	no	0	0	0	0	0	0	0	0	0	0
EOG090C0DLG	ENSGACG00000009587	transmembrane and ubiquitin-like domain containing 2	ENSONIG00000000814	Transmembrane:Helical	tmub2	transmembrane and ubiquitin-like domain containing 2	1	1	no	0	0	0	0	0	0	0	0	0	0
EOG090C016Q	ENSGACG00000010930	protein phosphatase 2, regulatory subunit B'', alpha	ENSONIG00000000815	protein phosphatase 2, regulatory subunit B'', alpha	ppp2r3a	protein phosphatase 2, regulatory subunit B'', alpha	1	1	no	0	0	0	0	0	0	0	0	0	0
EOG090C06JC	ENSGACG00000009576	ankyrin repeat and SOCS box containing 16	ENSONIG00000000816	Similarity:Contains 6 ANK repeats.	asb16	ankyrin repeat and SOCS box containing 16	1	1	no	0	0	0	0	0	0	0	0	0	0
EOG090C04CW	ENSGACG00000010695	PHD finger protein 19	ENSONIG00000000818	PHD finger protein 19	phf19	PHD finger protein 19	1	1	no	0	0	0	0	0	0	0	0	0	0
EOG090C03VP	ENSGACG00000012875	heat shock protein 90, alpha (cytosolic), class A member 1, tandem duplicate 1	ENSONIG00000000819	heat shock protein 90, alpha (cytosolic), class A member 1, tandem duplicate 1	hsp90aa1.1	heat shock protein HSP 90-alpha 1	1	1	no	0	0	0	0	0	0	0	0	0	0
EOG090C09Y5	ENSGACG00000000794	\N	ENSONIG00000000820	Similarity:Contains 1 basic helix-loop-helix (bHLH) domain.			1	1	no	0	0	0	0	0	0	0	0	0	0
EOG090C06S5	ENSGACG00000009570	chromosome 17 open reading frame 53	ENSONIG00000000821	chromosome 17 open reading frame 53	si:dkey-260c8.8	si:dkey-260c8.8	1	1	no	0	0	0	0	0	0	0	0	0	0
EOG090C04OK	ENSGACG00000009558	acid-sensing (proton-gated) ion channel 2	ENSONIG00000000822	Similarity:Belongs to the amiloride-sensitive sodium channel (TC 1.A.6) family.	asic2	acid sensing ion channel subunit 2	1	1	no	0	0	0	0	0	0	0	0	0	0
EOG090C04PH	ENSGACG00000012871	WD repeat domain 20b	ENSONIG00000000823	WD repeat domain 20b	wdr20b	WD repeat domain 20b	1	1	no	0	0	0	0	0	0	0	0	0	0
EOG090C0270	ENSGACG00000010392	si:ch211-120p12.3	ENSONIG00000000824	Active Site:Proton acceptor	map3k21	mitogen-activated protein kinase kinase kinase 21	1	1	no	0	0	0	0	0	0	0	0	0	0
EOG090C01BA	ENSGACG00000010937	fibronectin type III domain containing 3Bb	ENSONIG00000000825	Transmembrane:Helical	fndc3ba	fibronectin type III domain-containing protein 3B	1	1	no	0	0	0	0	0	0	0	0	0	0
EOG090C04SM	ENSGACG00000006899;ENSGACG00000009540	membrane protein, palmitoylated 3b (MAGUK p55 subfamily member 3) ;membrane protein, palmitoylated 3a (MAGUK p55 subfamily member 3)	ENSONIG00000000827;ENSONIG00000016460	Similarity:Contains 1 PDZ (DHR) domain.;Similarity:Contains 1 PDZ (DHR) domain.	mpp3a;mpp3b	membrane palmitoylated protein 3 ;MAGUK p55 subfamily member 3	2	2	no	0	0	0	0	0	0	0	0	0	0
EOG090C071Q	ENSGACG00000001153	CXXC finger protein 1a	ENSONIG00000000828	CXXC finger protein 1a	cxxc1a	CXXC finger protein 1a	1	1	no	0	0	0	0	0	0	0	0	0	0
EOG090C0GT9	ENSGACG00000012858	ribosomal protein S29	ENSONIG00000000829	ribosomal protein S29	rps29	ribosomal protein S29	1	1	yes	0	1	0	0	0	0	0	0	0	0
EOG090C016X	ENSGACG00000010699;ENSGACG00000015916	\N;DAB2 interacting protein b	ENSONIG00000000830;ENSONIG00000011245	C2 domain;Similarity:Contains PH domain.	;dab2ipb	;DAB2 interacting protein	2	2	no	0	0	0	0	0	0	0	0	0	0
EOG090C01M1	ENSGACG00000012846	MAM domain containing 1	ENSONIG00000000831	MAM domain containing glycosylphosphatidylinositol anchor 2	MDGA2	MAM domain containing glycosylphosphatidylinositol anchor 2	1	1	no	0	0	0	0	0	0	0	0	0	0
EOG090C0FPZ	ENSGACG00000010404	interleukin 22 receptor, alpha 2	ENSONIG00000000832	interleukin 22 receptor, alpha 2	il22ra2	interleukin-22 receptor subunit alpha-2	1	1	no	0	0	0	0	0	0	0	0	0	0
EOG090C08CV	ENSGACG00000010407	\N	ENSONIG00000000833	Uncharacterized protein			1	1	no	0	0	0	0	0	0	0	0	0	0
EOG090C05NN	ENSGACG00000010424;ENSGACG00000019589	atlastin GTPase 2 ;atlastin GTPase 2	ENSONIG00000000835;ENSONIG00000016118	Similarity:Contains GB1/RHD3-type G (guanine nucleotide-binding) domain.;Similarity:Contains GB1/RHD3-type G (guanine nucleotide-binding) domain.	atl2;	atlastin GTPase 2 ;	2	2	no	0	0	0	0	0	0	0	0	0	0
EOG090C035E	ENSGACG00000001150	histone deacetylase 6	ENSONIG00000000836	histone deacetylase 6	hdac6	histone deacetylase 6	1	1	no	0	0	0	0	0	0	0	0	0	0
EOG090C02SI	ENSGACG00000009536	zinc finger protein 281	ENSONIG00000000839	zinc finger protein 281	znf281a	zinc finger protein 281	1	1	no	0	0	0	0	0	0	0	0	0	0
EOG090C0CHE	ENSGACG00000000109;ENSGACG00000012854;ENSGACG00000015307;ENSGACG00000015309	astacin-like metallo-endopeptidase (M12 family) ;astacin-like metallo-endopeptidase (M12 family) ;hatching enzyme (gahce1), mRNA ;astacin-like metallo-endopeptidase (M12 family)	ENSONIG00000000840;ENSONIG00000020919;ENSONIG00000020921	Metalloendopeptidase;Metalloendopeptidase;Metalloendopeptidase	;;he1.2	;;hatching enzyme 1, tandem dupliate 2	4	3	no	0	0	0	0	0	0	0	0	0	0
EOG090C08Q6	ENSGACG00000010439;ENSGACG00000020021	solute carrier family 29 (equilibrative nucleoside transporter), member 1a ;solute carrier family 29 (equilibrative nucleoside transporter), member 1	ENSONIG00000000841;ENSONIG00000019840	Transmembrane:Helical;Transmembrane:Helical	slc29a1a;	equilibrative nucleoside transporter 1 ;	2	2	yes	0	0	0	0	0	1	0	0	0	0
EOG090C0AIF	ENSGACG00000010956	growth hormone secretagogue receptor a	ENSONIG00000000842	Similarity:Belongs to the G-protein coupled receptor 1 family.	ghsrb	growth hormone secretagogue receptor b	1	1	no	0	0	0	0	0	0	0	0	0	0
EOG090C01J5	ENSGACG00000010958;ENSGACG00000012653	phospholipase D1a ;phospholipase D1b	ENSONIG00000000843;ENSONIG00000008255	Similarity:Contains 1 PH domain.;phospholipase D1b	pld1a;pld1b	phospholipase D1 ;phospholipase D1	2	2	no	0	0	0	0	0	0	0	0	0	0
EOG090C05OC	ENSGACG00000009533	si:dkey-106c17.3	ENSONIG00000000844	Transmembrane:Helical	kcnj19a	G protein-activated inward rectifier potassium channel 1	1	1	no	0	0	0	0	0	0	0	0	0	0
EOG090C04KD	ENSGACG00000010710	family with sequence similarity 160, member B2	ENSONIG00000000845	family with sequence similarity 160, member B2			1	1	no	0	0	0	0	0	0	0	0	0	0
EOG090C0D55	ENSGACG00000009522	transmembrane protein 98	ENSONIG00000000846	Transmembrane:Helical	tmem98	transmembrane protein 98	1	1	yes	0	0	0	0	0	0	0	0	0	1
EOG090C00JC	ENSGACG00000009487	si:dkeyp-57f11.2	ENSONIG00000000847	si:dkeyp-57f11.2	svilc	supervillin c	1	1	no	0	0	0	0	0	0	0	0	0	0
EOG090C0BI5	ENSGACG00000009465	cyclin-dependent kinase 21	ENSONIG00000000848	cyclin-dependent kinase 21	cdk21	cyclin-dependent kinase 4	1	1	no	0	0	0	0	0	0	0	0	0	0
EOG090C0DSW	ENSGACG00000012834	FK506 binding protein 3	ENSONIG00000000849	Peptidyl-prolyl cis-trans isomerase	fkbp3	FKBP prolyl isomerase 3	1	1	no	0	0	0	0	0	0	0	0	0	0
EOG090C05NS	ENSGACG00000009445	retinol saturase (all-trans-retinol 13,14-reductase)	ENSONIG00000000850	Transmembrane:Helical	retsat	retinol saturase	1	1	yes	0	0	0	0	0	0	0	0	1	0
EOG090C08H6	ENSGACG00000010491	zgc:101562	ENSONIG00000000851	zgc:101562			1	1	no	0	0	0	0	0	0	0	0	0	0
EOG090C06V4	ENSGACG00000010492	adenylosuccinate synthase	ENSONIG00000000852	Adenylosuccinate synthetase, acidic isozyme	adss	adenylosuccinate synthase	1	1	no	0	0	0	0	0	0	0	0	0	0
EOG090C033T	ENSGACG00000010735;ENSGACG00000016647	dynamin 1b ;dynamin 1a	ENSONIG00000000853;ENSONIG00000002836	Similarity:Belongs to the TRAFAC class dynamin-like GTPase superfamily. Dynamin/Fzo/YdjA family.;Similarity:Belongs to the TRAFAC class dynamin-like GTPase superfamily. Dynamin/Fzo/YdjA family.	;dnm1a	;dynamin 1a	2	2	no	0	0	0	0	0	0	0	0	0	0
EOG090C0FSO	ENSGACG00000012791	Finkel-Biskis-Reilly murine sarcoma virus (FBR-MuSV) ubiquitously expressed a	ENSONIG00000000854	Finkel-Biskis-Reilly murine sarcoma virus (FBR-MuSV) ubiquitously expressed a	faua	FAU, ubiquitin like and ribosomal protein S30 fusion	1	1	no	0	0	0	0	0	0	0	0	0	0
EOG090C05BC	ENSGACG00000009436	N-myristoyltransferase 1a	ENSONIG00000000855	Glycylpeptide N-tetradecanoyltransferase	nmt1a	N-myristoyltransferase 1	1	1	no	0	0	0	0	0	0	0	0	0	0
EOG090C0AVJ	ENSGACG00000001145;ENSGACG00000012091	synaptophysin a ;synaptophysin b	ENSONIG00000000856;ENSONIG00000000858;ENSONIG00000016821	Transmembrane:Helical;Transmembrane:Helical;Transmembrane:Helical	sypa (1 of many);sypa (1 of many);sypb	synaptophysin a ;synaptophysin ;synaptophysin	2	3	no	0	0	0	0	0	0	0	0	0	0
EOG090C00YQ	ENSGACG00000010967;ENSGACG00000012636	TRAF2 and NCK interacting kinase ;TRAF2 and NCK interacting kinase	ENSONIG00000000857;ENSONIG00000017666	TRAF2 and NCK interacting kinase ;TRAF2 and NCK interacting kinase	tnika;TNIK (1 of many)	TRAF2 and NCK interacting kinase a ;TRAF2 and NCK interacting kinase	2	2	no	0	0	0	0	0	0	0	0	0	0
EOG090C0397	ENSGACG00000012765	PRP39 pre-mRNA processing factor 39 homolog (yeast)	ENSONIG00000000859	PRP39 pre-mRNA processing factor 39 homolog (yeast)	prpf39	pre-mRNA processing factor 39	1	1	no	0	0	0	0	0	0	0	0	0	0
EOG090C02SJ	ENSGACG00000009415;ENSGACG00000015291	phospholipase C, delta 3a ;phospholipase C, delta 3b	ENSONIG00000000860;ENSONIG00000008054	Phosphoinositide phospholipase C;Phosphoinositide phospholipase C	plcd3a;	phospholipase C delta 3 ;	2	2	no	0	0	0	0	0	0	0	0	0	0
EOG090C00E3	ENSGACG00000000800	calcium channel, voltage-dependent, L type, alpha 1F subunit	ENSONIG00000000861	Similarity:Belongs to the calcium channel alpha-1 subunit (TC 1.A.1.11) family.	cacna1fb	calcium channel, voltage-dependent, L type, alpha 1F subunit	1	1	yes	0	0	0	0	0	0	0	0	1	0
EOG090C055A	ENSGACG00000010518	zinc finger and BTB domain containing 18	ENSONIG00000000862	Similarity:Contains 1 BTB (POZ) domain.	zbtb18	zinc finger and BTB domain containing 18	1	1	no	0	0	0	0	0	0	0	0	0	0
EOG090C06Z5	ENSGACG00000012749	\N	ENSONIG00000000865	Uncharacterized protein		E3 ubiquitin-protein ligase pellino homolog 2	1	1	no	0	0	0	0	0	0	0	0	0	0
EOG090C0BGF	ENSGACG00000012744	orthodenticle homeobox 2	ENSONIG00000000866;ENSONIG00000020156	orthodenticle homeobox 2 ;orthodenticle homeobox 2	;otx2b	homeobox protein OTX2 ;homeobox protein OTX2	1	2	no	0	0	0	0	0	0	0	0	0	0
EOG090C043J	ENSGACG00000010549	serologically defined colon cancer antigen 8	ENSONIG00000000867	serologically defined colon cancer antigen 8	sdccag8	serologically defined colon cancer antigen 8	1	1	no	0	0	0	0	0	0	0	0	0	0
EOG090C00I1	ENSGACG00000009398	Rho GTPase activating protein 23a	ENSONIG00000000868	Similarity:Contains 1 PDZ (DHR) domain.	arhgap23a	Rho GTPase activating protein 23a	1	1	no	0	0	0	0	0	0	0	0	0	0
EOG090C0DO4	ENSGACG00000012738	N(alpha)-acetyltransferase 30, NatC catalytic subunit	ENSONIG00000000869	N(alpha)-acetyltransferase 30, NatC catalytic subunit	naa30	N(alpha)-acetyltransferase 30, NatC catalytic subunit	1	1	no	0	0	0	0	0	0	0	0	0	0
EOG090C07AR	ENSGACG00000012675	actin-related protein 10 homolog (S. cerevisiae)	ENSONIG00000000870	Similarity:Belongs to the actin family.	actr10	actin related protein 10 homolog	1	1	no	0	0	0	0	0	0	0	0	0	0
EOG090C040Z	ENSGACG00000010558	tumor necrosis factor, alpha-induced protein 3	ENSONIG00000000871	tumor necrosis factor, alpha-induced protein 3	tnfaip3	TNF alpha induced protein 3	1	1	no	0	0	0	0	0	0	0	0	0	0
EOG090C07SJ	ENSGACG00000010985	solute carrier family 2 (facilitated glucose transporter), member 2	ENSONIG00000000872	Similarity:Belongs to the major facilitator superfamily. Sugar transporter (TC 2.A.1.1) family.	slc2a2	solute carrier family 2, facilitated glucose transporter member 2	1	1	no	0	0	0	0	0	0	0	0	0	0
EOG090C03JP	ENSGACG00000010748	\N	ENSONIG00000000873	Similarity:Contains N-terminal Ras-GEF domain.			1	1	no	0	0	0	0	0	0	0	0	0	0
EOG090C0DKM	ENSGACG00000012672	CLOCK-interacting pacemaker b	ENSONIG00000000875	CLOCK-interacting pacemaker b	cipcb	CLOCK-interacting pacemaker	1	1	no	0	0	0	0	0	0	0	0	0	0
EOG090C06SF	ENSGACG00000012666	zinc finger protein 410	ENSONIG00000000876	zinc finger protein 410	znf410	zinc finger protein 410	1	1	no	0	0	0	0	0	0	0	0	0	0
EOG090C0BO6	ENSGACG00000003561;ENSGACG00000009381	LIM and SH3 protein 1 ;LIM and SH3 protein 1	ENSONIG00000000877;ENSONIG00000018295	Similarity:Contains 1 LIM zinc-binding domain.;Similarity:Contains 1 LIM zinc-binding domain.	lasp1;	LIM and SH3 protein 1 ;LIM and SH3 domain protein 1	2	2	no	0	0	0	0	0	0	0	0	0	0
EOG090C07PB	ENSGACG00000012614	ectonucleoside triphosphate diphosphohydrolase 5b	ENSONIG00000000878	ectonucleoside triphosphate diphosphohydrolase 5b	entpd5b	ectonucleoside triphosphate diphosphohydrolase 5b	1	1	no	0	0	0	0	0	0	0	0	0	0
EOG090C0ES2	ENSGACG00000010995	\N	ENSONIG00000000879	Eukaryotic translation initiation factor 5A		eukaryotic translation initiation factor 5A-1	1	1	no	0	0	0	0	0	0	0	0	0	0
EOG090C05YK	ENSGACG00000009371	plexin domain containing 1	ENSONIG00000000880	Transmembrane:Helical	PLXDC1	plexin domain-containing protein 1	1	1	no	0	0	0	0	0	0	0	0	0	0
EOG090C0FLD	ENSGACG00000010566	PERP, TP53 apoptosis effector	ENSONIG00000000881	Transmembrane:Helical	perp	PERP, TP53 apoptosis effector	1	1	no	0	0	0	0	0	0	0	0	0	0
EOG090C04VW	ENSGACG00000011010	solute carrier family 7, member 14a	ENSONIG00000000882	Transmembrane:Helical	slc7a14a	solute carrier family 7 member 14	1	1	yes	0	0	0	0	0	0	0	0	1	0
EOG090C0D9Q	ENSGACG00000010587	transmembrane protein 26a	ENSONIG00000000883;ENSONIG00000000886	Transmembrane:Helical;Transmembrane:Helical	tmem26a;TMEM26 (1 of many)	transmembrane protein 26a ;transmembrane protein 26	1	2	no	0	0	0	0	0	0	0	0	0	0
EOG090C05G9	ENSGACG00000012603	aldehyde dehydrogenase 6 family, member A1	ENSONIG00000000884;ENSONIG00000020167	Similarity:Belongs to the aldehyde dehydrogenase family.;Similarity:Belongs to the aldehyde dehydrogenase family.	;ALDH6A1	methylmalonate-semialdehyde dehydrogenase ;aldehyde dehydrogenase 6 family member A1	1	2	no	0	0	0	0	0	0	0	0	0	0
EOG090C0EQR	ENSGACG00000011024;ENSGACG00000012526	claudin 11a ;claudin 11b	ENSONIG00000000887;ENSONIG00000017659	Claudin;Claudin	cldn11a;cldn11b	claudin-11 ;claudin-11	2	2	no	0	0	0	0	0	0	0	0	0	0
EOG090C014O	ENSGACG00000011030	glutamate receptor, ionotropic, N-methyl-D-aspartate 3Ba	ENSONIG00000000888	Transmembrane:Helical	grin3ba	glutamate receptor, ionotropic, N-methyl-D-aspartate 3Ba	1	1	no	0	0	0	0	0	0	0	0	0	0
EOG090C03R9	ENSGACG00000010603	AT rich interactive domain 5B (MRF1-like)	ENSONIG00000000889	Similarity:Contains ARID domain.			1	1	no	0	0	0	0	0	0	0	0	0	0
EOG090C0E62	ENSGACG00000009321	ADP-ribosylation factor-like 5C	ENSONIG00000000890	Similarity:Belongs to the small GTPase superfamily. Arf family.	arl5c	ADP-ribosylation factor-like 5C	1	1	no	0	0	0	0	0	0	0	0	0	0
EOG090C03O6	ENSGACG00000010606	rhotekin 2a	ENSONIG00000000891	rhotekin 2a	rtkn2a	rhotekin 2a	1	1	no	0	0	0	0	0	0	0	0	0	0
EOG090C04AC	ENSGACG00000009291	calcium channel, voltage-dependent, beta 1 subunit	ENSONIG00000000892	Similarity:Contains SH3 domain.	cacnb1	calcium channel, voltage-dependent, beta 1 subunit	1	1	no	0	0	0	0	0	0	0	0	0	0
EOG090C04X8	ENSGACG00000011037	lipid phosphate phosphatase-related protein type 3a	ENSONIG00000000893	Transmembrane:Helical	plppr3a	phospholipid phosphatase related 3a	1	1	yes	0	0	0	0	0	0	0	0	1	0
EOG090C02IV	ENSGACG00000012599	leucine rich repeat and fibronectin type III domain containing 5b	ENSONIG00000000894	Similarity:Contains LRRCT domain.	lrfn5b	leucine rich repeat and fibronectin type III domain containing 5b	1	1	no	0	0	0	0	0	0	0	0	0	0
EOG090C00YV	ENSGACG00000010618	centrosomal protein 170Aa	ENSONIG00000000895	centrosomal protein 170Aa	cep170aa	centrosomal protein 170Aa	1	1	no	0	0	0	0	0	0	0	0	0	0
EOG090C0A26	ENSGACG00000008573;ENSGACG00000012595	\N;YY1 transcription factor b	ENSONIG00000000896;ENSONIG00000020108	YY1 transcription factor b ;Transcription factor yin/yang	yy1b;YY1 (1 of many)	YY1 transcription factor b ;transcriptional repressor protein YY1	2	2	no	0	0	0	0	0	0	0	0	0	0
EOG090C0EJO	ENSGACG00000011043	paralemmin 1b	ENSONIG00000000897	paralemmin 1b	palm1b	paralemmin-1	1	1	no	0	0	0	0	0	0	0	0	0	0
EOG090C04CT	ENSGACG00000011048	polypyrimidine tract binding protein 1a	ENSONIG00000000899	polypyrimidine tract binding protein 1a	ptbp1a	polypyrimidine tract binding protein 1a	1	1	no	0	0	0	0	0	0	0	0	0	0
EOG090C0FES	ENSGACG00000006059;ENSGACG00000009280	ribosomal protein L19 ;ribosomal protein L19	ENSONIG00000000900;ENSONIG00000016266	ribosomal protein L19 ;Ribosomal protein L19	rpl19;RPL19 (1 of many)	60S ribosomal protein L19 ;60S ribosomal protein L19	2	2	yes	0	1	0	0	0	0	0	0	0	0
EOG090C0FGN	ENSGACG00000010631	histidine triad nucleotide binding protein 1	ENSONIG00000000901	histidine triad nucleotide binding protein 1	HINT1	histidine triad nucleotide binding protein 1	1	1	no	0	0	0	0	0	0	0	0	0	0
EOG090C09IC	ENSGACG00000009252;ENSGACG00000009255;ENSGACG00000009259;ENSGACG00000009269;ENSGACG00000009274	ST8 alpha-N-acetyl-neuraminide alpha-2,8-sialyltransferase 6 ;ST8 alpha-N-acetyl-neuraminide alpha-2,8-sialyltransferase 6 ;ST8 alpha-N-acetyl-neuraminide alpha-2,8-sialyltransferase 6 ;ST8 alpha-N-acetyl-neuraminide alpha-2,8-sialyltransferase 6 ;ST8 alpha-N-acetyl-neuraminide alpha-2,8-sialyltransferase 6	ENSONIG00000000902;ENSONIG00000000909	ST8 alpha-N-acetyl-neuraminide alpha-2,8-sialyltransferase 6 ;ST8 alpha-N-acetyl-neuraminide alpha-2,8-sialyltransferase 6	st8sia6 (1 of many);st8sia6 (1 of many)	alpha-2,8-sialyltransferase 8F ;ST8 alpha-N-acetyl-neuraminide alpha-2,8-sialyltransferase 6	5	2	no	0	0	0	0	0	0	0	0	0	0
EOG090C08WU	ENSGACG00000010638	dynein, cytoplasmic 2, light intermediate chain 1	ENSONIG00000000903	dynein, cytoplasmic 2, light intermediate chain 1	dync2li1	dynein, cytoplasmic 2, light intermediate chain 1	1	1	no	0	0	0	0	0	0	0	0	0	0
EOG090C0C5D	ENSGACG00000012581	\N	ENSONIG00000000904	Uncharacterized protein			1	1	yes	0	0	0	0	0	0	0	0	1	0
EOG090C0DET	ENSGACG00000011052	ephrin-A2a	ENSONIG00000000905;ENSONIG00000007621	Similarity:Belongs to the ephrin family.;Similarity:Belongs to the ephrin family.	efna2a;	ephrin-A2a ;	1	2	no	0	0	0	0	0	0	0	0	0	0
EOG090C00RC	ENSGACG00000012550	mitogen-activated protein kinase binding protein 1	ENSONIG00000000906	mitogen-activated protein kinase binding protein 1			1	1	no	0	0	0	0	0	0	0	0	0	0
EOG090C0CBQ	ENSGACG00000011055	synaptosomal-associated protein 23.1	ENSONIG00000000907	Synaptosomal-associated protein	snap23.1	synaptosome associated protein 23	1	1	no	0	0	0	0	0	0	0	0	0	0
EOG090C01H1	ENSGACG00000000805;ENSGACG00000012146	MAGI family member, X-linked a ;MAGI family member, X-linked b	ENSONIG00000000908;ENSONIG00000016835	Similarity:Contains 5 PDZ (DHR) domains.;Similarity:Contains 5 PDZ (DHR) domains.	magixa;magixb	MAGI family member, X-linked a ;MAGI family member, X-linked b	2	2	yes	1	0	0	0	0	0	0	0	0	0
EOG090C09OE	ENSGACG00000002384;ENSGACG00000006369;ENSGACG00000009243;ENSGACG00000014294	connexin 43.4 ;gap junction protein, gamma 1, 45kDa ;gap junction protein, gamma 1, 45kDa ;si:dkey-91f15.8	ENSONIG00000000910;ENSONIG00000009477;ENSONIG00000013358;ENSONIG00000016318;ENSONIG00000017718;ENSONIG00000021343	Gap junction protein;Gap junction protein;Gap junction protein;Gap junction protein;Gap junction protein;Gap junction protein	;cx47.1;;;;cx43.4	;connexin 47.1 ;;;;connexin 43.4	4	6	no	0	0	0	0	0	0	0	0	0	0
EOG090C05C4	ENSGACG00000010653	ATP-binding cassette, sub-family G (WHITE), member 5	ENSONIG00000000911	Similarity:Belongs to the ABC transporter superfamily.	abcg5	ATP binding cassette subfamily G member 5	1	1	no	0	0	0	0	0	0	0	0	0	0
EOG090C01PP	ENSGACG00000009163	elongation factor Tu GTP binding domain containing 2	ENSONIG00000000912	elongation factor Tu GTP binding domain containing 2	eftud2	elongation factor Tu GTP binding domain containing 2	1	1	no	0	0	0	0	0	0	0	0	0	0
EOG090C0BG8	ENSGACG00000003990;ENSGACG00000012546	lectin, galactoside-binding, soluble, 3 (galectin 3)-like ;\N	ENSONIG00000000913;ENSONIG00000011737	Galectin;Galectin	;lgals3b	;lectin, galactoside binding soluble 3b	2	2	no	0	0	0	0	0	0	0	0	0	0
EOG090C006P	ENSGACG00000011100	spectrin, beta, erythrocytic	ENSONIG00000000914	spectrin, beta, erythrocytic	sptb	spectrin, beta, erythrocytic	1	1	no	0	0	0	0	0	0	0	0	0	0
EOG090C04AG	ENSGACG00000010667	ATP-binding cassette, sub-family G (WHITE), member 8	ENSONIG00000000915	Similarity:Belongs to the ABC transporter superfamily.	abcg8	ATP binding cassette subfamily G member 8	1	1	yes	0	0	0	0	0	1	0	0	1	0
EOG090C03S7	ENSGACG00000012537	p21 protein (Cdc42/Rac)-activated kinase 7	ENSONIG00000000916	Non-specific serine/threonine protein kinase	pak7	p21 protein (Cdc42/Rac)-activated kinase 7	1	1	no	0	0	0	0	0	0	0	0	0	0
EOG090C0111	ENSGACG00000010679	leucine-rich pentatricopeptide repeat containing	ENSONIG00000000917	leucine-rich pentatricopeptide repeat containing	lrpprc	leucine rich pentatricopeptide repeat containing	1	1	no	0	0	0	0	0	0	0	0	0	0
EOG090C0BVX	ENSGACG00000012532	lysosomal-associated membrane protein family, member 5	ENSONIG00000000918	Transmembrane:Helical	LAMP5	lysosomal associated membrane protein family member 5	1	1	no	0	0	0	0	0	0	0	0	0	0
EOG090C014L	ENSGACG00000012503	phospholipase C, beta 4	ENSONIG00000000919	Phosphoinositide phospholipase C	PLCB4	phospholipase C beta 4	1	1	no	0	0	0	0	0	0	0	0	0	0
EOG090C05XA	ENSGACG00000009154	zinc finger protein 652	ENSONIG00000000921	zinc finger protein 652	znf652	zinc finger protein 652	1	1	no	0	0	0	0	0	0	0	0	0	0
EOG090C0FX4	ENSGACG00000001285;ENSGACG00000012766;ENSGACG00000012779;ENSGACG00000012792	\N;\N;\N;\N	ENSONIG00000000922;ENSONIG00000004521;ENSONIG00000004522;ENSONIG00000004524;ENSONIG00000004525;ENSONIG00000004529;ENSONIG00000004534;ENSONIG00000004540;ENSONIG00000004542;ENSONIG00000004547;ENSONIG00000006427;ENSONIG00000010952;ENSONIG00000014938;ENSONIG00000014940;ENSONIG00000016408;ENSONIG00000021351;ENSONIG00000021352;ENSONIG00000021353;ENSONIG00000021355	immunoglobulin heavy variable 10-1 ;immunoglobulin heavy variable 10-1 ;immunoglobulin heavy variable 10-1 ;immunoglobulin heavy variable 10-1 ;immunoglobulin heavy variable 10-1 ;Uncharacterized protein ;immunoglobulin heavy variable 10-1 ;Uncharacterized protein ;immunoglobulin heavy variable 10-1 ;immunoglobulin heavy variable 10-1 ;immunoglobulin heavy variable 10-1 ;immunoglobulin heavy vari…	;;;;;;;;;;;;;;;;;;	;;;;;;;;;;;;;;;;;;	4	19	no	0	0	0	0	0	0	0	0	0	0
EOG090C0C2O	ENSGACG00000009106	prohibitin	ENSONIG00000000923	prohibitin	phb	prohibitin	1	1	no	0	0	0	0	0	0	0	0	0	0
EOG090C01AO	ENSGACG00000009103	\N	ENSONIG00000000924	\N			1	1	no	0	0	0	0	0	0	0	0	0	0
EOG090C09WY	ENSGACG00000009096	vesicle amine transport 1	ENSONIG00000000925	vesicle amine transport 1	vat1	vesicle amine transport 1	1	1	no	0	0	0	0	0	0	0	0	0	0
EOG090C0ATN	ENSGACG00000010715	zinc finger, HIT-type containing 2	ENSONIG00000000926	zinc finger, HIT-type containing 2	znhit2	zinc finger, HIT-type containing 2	1	1	no	0	0	0	0	0	0	0	0	0	0
EOG090C086N	ENSGACG00000010723	protein phosphatase, Mg2+/Mn2+ dependent, 1Ba	ENSONIG00000000927	Similarity:Belongs to the PP2C family.	ppm1ba	protein phosphatase, Mg2+/Mn2+ dependent, 1Ba	1	1	no	0	0	0	0	0	0	0	0	0	0
EOG090C0377	ENSGACG00000010738	solute carrier family 3 (amino acid transporter heavy chain), member 1	ENSONIG00000000928	Transmembrane:Helical	slc3a1	solute carrier family 3 (amino acid transporter heavy chain), member 1	1	1	no	0	0	0	0	0	0	0	0	0	0
EOG090C05WQ	ENSGACG00000014498	solute carrier family 19 (folate transporter), member 1	ENSONIG00000000929	Transmembrane:Helical	slc19a1	solute carrier family 19 member 1	1	1	no	0	0	0	0	0	0	0	0	0	0
EOG090C0146	ENSGACG00000011133	codanin 1	ENSONIG00000000931	codanin 1	cdan1	codanin 1	1	1	no	0	0	0	0	0	0	0	0	0	0
EOG090C0BE6	ENSGACG00000014503	actin related protein 2/3 complex, subunit 2	ENSONIG00000000932	actin related protein 2/3 complex, subunit 2	arpc2	actin related protein 2/3 complex subunit 2	1	1	no	0	0	0	0	0	0	0	0	0	0
EOG090C01C3	ENSGACG00000012490	phospholipase C, beta 1 (phosphoinositide-specific)	ENSONIG00000000933	Phosphoinositide phospholipase C	si:ch1073-140o9.2	phospholipase C beta 1	1	1	no	0	0	0	0	0	0	0	0	0	0
EOG090C03JK	ENSGACG00000010764	prolyl endopeptidase-like	ENSONIG00000000934	prolyl endopeptidase-like	prepl	prolyl endopeptidase like	1	1	no	0	0	0	0	0	0	0	0	0	0
EOG090C0C48	ENSGACG00000009070	Rho family GTPase 2	ENSONIG00000000935;ENSONIG00000016322	Similarity:Belongs to the small GTPase superfamily. Rho family.;Rho family GTPase 2	rnd2;RND2 (1 of many)	rho-related GTP-binding protein RhoN ;rho-related GTP-binding protein RhoN	1	2	no	0	0	0	0	0	0	0	0	0	0
EOG090C00TL	ENSGACG00000009057	mannose receptor, C type 2	ENSONIG00000000936	Transmembrane:Helical	mrc2	mannose receptor C type 2	1	1	no	0	0	0	0	0	0	0	0	0	0
EOG090C09HZ	ENSGACG00000010786	calmodulin-lysine N-methyltransferase	ENSONIG00000000937	calmodulin-lysine N-methyltransferase	camkmt	calmodulin-lysine N-methyltransferase	1	1	no	0	0	0	0	0	0	0	0	0	0
EOG090C0CFX	ENSGACG00000014540	zgc:92380	ENSONIG00000000938	zgc:92380		keratin, type I cytoskeletal 18	1	1	no	0	0	0	0	0	0	0	0	0	0
EOG090C01Q9	ENSGACG00000011147	tau tubulin kinase 2	ENSONIG00000000940	tau tubulin kinase 2	ttbk2a	tau tubulin kinase 2	1	1	no	0	0	0	0	0	0	0	0	0	0
EOG090C0BOS	ENSGACG00000010790	SIX homeobox 2a	ENSONIG00000000941	SIX homeobox 2a	six2a	SIX homeobox 2	1	1	no	0	0	0	0	0	0	0	0	0	0
EOG090C01RV	ENSGACG00000010794	S1 RNA binding domain 1	ENSONIG00000000945	S1 RNA binding domain 1	si:ch211-117n7.8	S1 RNA binding domain 1	1	1	no	0	0	0	0	0	0	0	0	0	0
EOG090C03CW	ENSGACG00000011153	transmembrane protein 62	ENSONIG00000000947	Transmembrane:Helical	tmem62	transmembrane protein 62	1	1	no	0	0	0	0	0	0	0	0	0	0
EOG090C08KX	ENSGACG00000014542	keratin 80, type II	ENSONIG00000000948	Similarity:Belongs to the intermediate filament family.			1	1	no	0	0	0	0	0	0	0	0	0	0
EOG090C09PY	ENSGACG00000011166	prostaglandin reductase 2	ENSONIG00000000949	prostaglandin reductase 2	ptgr2	prostaglandin reductase 2	1	1	no	0	0	0	0	0	0	0	0	0	0
EOG090C0FBY	ENSGACG00000010801	CD74 molecule, major histocompatibility complex, class II invariant chain b	ENSONIG00000000951	Transmembrane:Helical		uncharacterized LOC100706178	1	1	no	0	0	0	0	0	0	0	0	0	0
EOG090C02F2	ENSGACG00000011196	ELM2 and Myb/SANT-like domain containing 1b	ENSONIG00000000952	ELM2 and Myb/SANT-like domain containing 1b	elmsan1b	ELM2 and SANT domain-containing protein 1	1	1	no	0	0	0	0	0	0	0	0	0	0
EOG090C0CVR	ENSGACG00000011235;ENSGACG00000012065	\N;zgc:101840	ENSONIG00000000955	Similarity:Contains 3 LIM zinc-binding domains.	crip2	cysteine-rich protein 2	2	1	no	0	0	0	0	0	0	0	0	0	0
EOG090C0A5O	ENSGACG00000014544	G protein-coupled bile acid receptor 1	ENSONIG00000000957	Transmembrane:Helical	gpbar1	G protein-coupled bile acid receptor 1	1	1	no	0	0	0	0	0	0	0	0	0	0
EOG090C08RO	ENSGACG00000012487	bone morphogenetic protein 2b	ENSONIG00000000958	Similarity:Belongs to the TGF-beta family.	bmp2b	bone morphogenetic protein 2	1	1	no	0	0	0	0	0	0	0	0	0	0
EOG090C086L	ENSGACG00000014546	angio-associated, migratory cell protein	ENSONIG00000000959	angio-associated, migratory cell protein	aamp	angio associated migratory cell protein	1	1	no	0	0	0	0	0	0	0	0	0	0
EOG090C03JZ	ENSGACG00000006434;ENSGACG00000009044	\N;tousled-like kinase 2	ENSONIG00000000960;ENSONIG00000016331	tousled-like kinase 2 ;Protein kinase, ATP binding site	tlk2;	serine/threonine-protein kinase tousled-like 2 ;	2	2	no	0	0	0	0	0	0	0	0	0	0
EOG090C03TE	ENSGACG00000012478	fermitin family member 1	ENSONIG00000000961	Similarity:Contains 1 PH domain.	fermt1	fermitin family member 1	1	1	no	0	0	0	0	0	0	0	0	0	0
EOG090C0CTH	ENSGACG00000000763;ENSGACG00000016407;ENSGACG00000016409;ENSGACG00000016419;ENSGACG00000016422;ENSGACG00000016423	novel immune-type receptor 13 ;novel immune-type receptor 13 ;novel immune-type receptor 13 ;novel immune-type receptor 13 ;novel immune-type receptor 13 ;novel immune-type receptor 13	ENSONIG00000000962;ENSONIG00000000972;ENSONIG00000000982;ENSONIG00000002333;ENSONIG00000002339;ENSONIG00000002340;ENSONIG00000002341;ENSONIG00000002342;ENSONIG00000002343;ENSONIG00000019884;ENSONIG00000019886;ENSONIG00000019890;ENSONIG00000019892	Transmembrane:Helical;Transmembrane:Helical;Transmembrane:Helical;novel immune-type receptor 13 ;Transmembrane:Helical;Transmembrane:Helical;novel immune-type receptor 13 ;novel immune-type receptor 13 ;Transmembrane:Helical;novel immune-type receptor 13 ;Transmembrane:Helical;Transmembrane:Helical;Transmembrane:Helical	;;;;;;;;;;;;	;;;;uncharacterized LOC100702894 ;;;;;;;;	6	13	no	0	0	0	0	0	0	0	0	0	0
EOG090C046R	ENSGACG00000010808;ENSGACG00000019228	phospholipase D family, member 5 ;phospholipase D family, member 5	ENSONIG00000000963;ENSONIG00000018852	Transmembrane:Helical;Transmembrane:Helical	;si:ch211-194e18.2	;phospholipase D family member 5	2	2	yes	0	0	0	0	0	0	0	0	1	0
EOG090C02VO	ENSGACG00000014564	histone deacetylase 4	ENSONIG00000000966	Histone deacetylase	HDAC4 (1 of many)	histone deacetylase 4	1	1	no	0	0	0	0	0	0	0	0	0	0
EOG090C091Z	ENSGACG00000010814	cilia and flagella associated protein 36	ENSONIG00000000967	cilia and flagella associated protein 36	CFAP36	cilia and flagella associated protein 36	1	1	no	0	0	0	0	0	0	0	0	0	0
EOG090C0907	ENSGACG00000012471	tRNA methyltransferase 6 homolog (S. cerevisiae)	ENSONIG00000000968	tRNA methyltransferase 6 homolog (S. cerevisiae)	trmt6	tRNA methyltransferase 6	1	1	no	0	0	0	0	0	0	0	0	0	0
EOG090C04K9	ENSGACG00000011264	metastasis associated 1	ENSONIG00000000969	metastasis associated 1	mta1	metastasis associated 1	1	1	no	0	0	0	0	0	0	0	0	0	0
EOG090C04MP	ENSGACG00000012445	zgc:110789	ENSONIG00000000971	Transmembrane:Helical		solute carrier family 23 member 1	1	1	no	0	0	0	0	0	0	0	0	0	0
EOG090C09YM	ENSGACG00000011271	zinc finger protein 36, C3H type-like 1a	ENSONIG00000000973	zinc finger protein 36, C3H type-like 1a	zfp36l1b	zinc finger protein 36, C3H type-like 1b	1	1	no	0	0	0	0	0	0	0	0	0	0
EOG090C039Y	ENSGACG00000010826	protein phosphatase 4, regulatory subunit 3B	ENSONIG00000000974	protein phosphatase 4, regulatory subunit 3B	ppp4r3b	protein phosphatase 4, regulatory subunit 3B	1	1	no	0	0	0	0	0	0	0	0	0	0
EOG090C00TD	ENSGACG00000011275	pleckstrin homology domain containing, family H (with MyTH4 domain) member 1	ENSONIG00000000975	Similarity:Contains 2 PH domains.	plekhh1	pleckstrin homology domain containing, family H (with MyTH4 domain) member 1	1	1	no	0	0	0	0	0	0	0	0	0	0
EOG090C08DG	ENSGACG00000009023	methyltransferase like 2A	ENSONIG00000000977	methyltransferase like 2A	mettl2a	methyltransferase-like protein 2-A	1	1	no	0	0	0	0	0	0	0	0	0	0
EOG090C0468	ENSGACG00000012430	glycerophosphocholine phosphodiesterase 1	ENSONIG00000000978	glycerophosphocholine phosphodiesterase 1	gpcpd1	glycerophosphocholine phosphodiesterase 1	1	1	no	0	0	0	0	0	0	0	0	0	0
EOG090C030W	ENSGACG00000006460;ENSGACG00000008948	integrin beta 3b ;integrin beta 3a	ENSONIG00000000980;ENSONIG00000016335	Integrin beta;Integrin beta	itgb3a;itgb3b	integrin beta-3 ;integrin subunit beta 3	2	2	no	0	0	0	0	0	0	0	0	0	0
EOG090C0315	ENSGACG00000010840	polyribonucleotide nucleotidyltransferase 1	ENSONIG00000000983	Similarity:Contains 1 KH domain.	PNPT1	polyribonucleotide nucleotidyltransferase 1	1	1	no	0	0	0	0	0	0	0	0	0	0
EOG090C0B2D	ENSGACG00000011818;ENSGACG00000012426	N-ethylmaleimide-sensitive factor attachment protein, beta a ;N-ethylmaleimide-sensitive factor attachment protein, beta	ENSONIG00000000984;ENSONIG00000001413	N-ethylmaleimide-sensitive factor attachment protein, beta ;N-ethylmaleimide-sensitive factor attachment protein, beta a	napbb;NAPB	beta-soluble NSF attachment protein ;NSF attachment protein beta	2	2	no	0	0	0	0	0	0	0	0	0	0
EOG090C0AVX	ENSGACG00000011289	solute carrier family 25 (mitochondrial oxoadipate carrier), member 21	ENSONIG00000000985	Similarity:Belongs to the mitochondrial carrier (TC 2.A.29) family.	slc25a21	solute carrier family 25 (mitochondrial oxoadipate carrier), member 21	1	1	no	0	0	0	0	0	0	0	0	0	0
EOG090C00JK	ENSGACG00000016411	slit homolog 3 (Drosophila)	ENSONIG00000000988	Similarity:Contains CTCK (C-terminal cystine knot-like) domain.	slit3	slit homolog 3 protein	1	1	no	0	0	0	0	0	0	0	0	0	0
EOG090C02LE	ENSGACG00000012415	heterogeneous nuclear ribonucleoprotein A0, like	ENSONIG00000000989	Similarity:Contains 1 BTB (POZ) domain.	GZF1	GDNF inducible zinc finger protein 1	1	1	no	0	0	0	0	0	0	0	0	0	0
EOG090C09HC	ENSGACG00000011298	paired box 9	ENSONIG00000000990	Similarity:Contains 1 paired domain.	pax9	paired box 9	1	1	no	0	0	0	0	0	0	0	0	0	0
EOG090C0A08	ENSGACG00000014573;ENSGACG00000018258	phosphoribosyl pyrophosphate synthetase 2 ;phosphoribosyl pyrophosphate synthetase 1A	ENSONIG00000000991;ENSONIG00000017867	phosphoribosyl pyrophosphate synthetase 2 ;phosphoribosyl pyrophosphate synthetase 1A	;prps1b	ribose-phosphate pyrophosphokinase 2 ;phosphoribosyl pyrophosphate synthetase 1B	2	2	no	0	0	0	0	0	0	0	0	0	0
EOG090C08VX	ENSGACG00000012406	tribbles pseudokinase 2	ENSONIG00000000992	tribbles pseudokinase 2	trib2	tribbles pseudokinase 2	1	1	no	0	0	0	0	0	0	0	0	0	0
EOG090C0B16	ENSGACG00000003946;ENSGACG00000014580	glycoprotein M6Bb ;\N	ENSONIG00000000993;ENSONIG00000016037	Transmembrane:Helical;Transmembrane:Helical	;gpm6bb	;glycoprotein M6Bb	2	2	no	0	0	0	0	0	0	0	0	0	0
EOG090C0CYL	ENSGACG00000011300	NK2 homeobox 8	ENSONIG00000000994	Similarity:Contains homeobox DNA-binding domain.	NKX2-8	NK2 homeobox 8	1	1	no	0	0	0	0	0	0	0	0	0	0
EOG090C0AEF	ENSGACG00000011301	NK2 homeobox 1	ENSONIG00000000995	Similarity:Contains homeobox DNA-binding domain.	nkx2.1	NK2 homeobox 1	1	1	no	0	0	0	0	0	0	0	0	0	0
EOG090C02E5	ENSGACG00000012401	kelch-like family member 29	ENSONIG00000000996	Similarity:Contains 1 BTB (POZ) domain.	klhl29	kelch-like family member 29	1	1	no	0	0	0	0	0	0	0	0	0	0
EOG090C0DBX	ENSGACG00000011304	MAP3K12 binding inhibitory protein 1	ENSONIG00000000997	MAP3K12 binding inhibitory protein 1	mbip	MAP3K12 binding inhibitory protein 1	1	1	no	0	0	0	0	0	0	0	0	0	0
EOG090C0E2O	ENSGACG00000008946	titin-cap (telethonin)	ENSONIG00000000998	titin-cap (telethonin)	tcap	titin-cap	1	1	no	0	0	0	0	0	0	0	0	0	0
EOG090C0DC1	ENSGACG00000008937	\N	ENSONIG00000000999	melanoregulin	zgc:91968	melanoregulin	1	1	no	0	0	0	0	0	0	0	0	0	0
EOG090C0130	ENSGACG00000012397	ATPase family, AAA domain containing 2B	ENSONIG00000001000	Similarity:Belongs to the AAA ATPase family.	atad2b	ATPase family, AAA domain containing 2B	1	1	no	0	0	0	0	0	0	0	0	0	0
EOG090C02SH	ENSGACG00000011310	ribosomal protein S6 kinase, polypeptide 5	ENSONIG00000001001	Ribosomal protein S6 kinase	rps6ka5	ribosomal protein S6 kinase alpha-5	1	1	no	0	0	0	0	0	0	0	0	0	0
EOG090C07UL	ENSGACG00000008920	StAR-related lipid transfer (START) domain containing 3	ENSONIG00000001002	Similarity:Contains START domain.	stard3	StAR related lipid transfer domain containing 3	1	1	no	0	0	0	0	0	0	0	0	0	0
EOG090C0EXW	ENSGACG00000014592	gem (nuclear organelle) associated protein 8	ENSONIG00000001003	gem (nuclear organelle) associated protein 8	gemin8	gem nuclear organelle associated protein 8	1	1	no	0	0	0	0	0	0	0	0	0	0
EOG090C00D8	ENSGACG00000010868	coiled-coil domain containing 88A	ENSONIG00000001005	coiled-coil domain containing 88A	CCDC88A	coiled-coil domain containing 88A	1	1	no	0	0	0	0	0	0	0	0	0	0
EOG090C0E8E	ENSGACG00000014596;ENSGACG00000014598	\N;\N	ENSONIG00000001007;ENSONIG00000001008;ENSONIG00000001009;ENSONIG00000001010;ENSONIG00000001908;ENSONIG00000001909;ENSONIG00000001910;ENSONIG00000006630;ENSONIG00000006631;ENSONIG00000010397;ENSONIG00000017725	Transmembrane:Helical;Uncharacterized protein ;Transmembrane:Helical;Uncharacterized protein ;Uncharacterized protein ;Uncharacterized protein ;Uncharacterized protein ;Uncharacterized protein ;Uncharacterized protein ;Uncharacterized protein ;Uncharacterized protein	;;;;;;;;;;	;;;;;;;;;;	2	11	no	0	0	0	0	0	0	0	0	0	0
EOG090C0D30	ENSGACG00000012393	UBX domain protein 2A	ENSONIG00000001012	UBX domain protein 2A	ubxn2a	UBX domain protein 2A	1	1	no	0	0	0	0	0	0	0	0	0	0
EOG090C046V	ENSGACG00000012385	major facilitator superfamily domain containing 2B	ENSONIG00000001013	Transmembrane:Helical	mfsd2b	major facilitator superfamily domain-containing protein 2B	1	1	yes	0	0	0	0	0	0	0	0	1	0
EOG090C03PI	ENSGACG00000011314	hydroxyacyl-CoA dehydrogenase/3-ketoacyl-CoA thiolase/enoyl-CoA hydratase (trifunctional protein), alpha subunit a	ENSONIG00000001016	Similarity:Belongs to the enoyl-CoA hydratase/isomerase family.	hadhab	hydroxyacyl-CoA dehydrogenase trifunctional multienzyme complex subunit alpha b	1	1	no	0	0	0	0	0	0	0	0	0	0
EOG090C03FG	ENSGACG00000012380	chromosome 2 open reading frame 44	ENSONIG00000001017	chromosome 2 open reading frame 44	wdcp	WD repeat and coiled coil containing	1	1	no	0	0	0	0	0	0	0	0	0	0
EOG090C04G4	ENSGACG00000002892;ENSGACG00000010879	calcium/calmodulin-dependent protein kinase II gamma ;calcium/calmodulin-dependent protein kinase (CaM kinase) II gamma 2	ENSONIG00000001018;ENSONIG00000015850	Similarity:Contains protein kinase domain.;Similarity:Contains protein kinase domain.	camk2g2;	calcium/calmodulin-dependent protein kinase type II subunit gamma ;calcium/calmodulin-dependent protein kinase type II subunit gamma	2	2	yes	0	0	0	0	0	0	0	0	1	0
EOG090C06O1	ENSGACG00000008904	F-box and leucine-rich repeat protein 20	ENSONIG00000001019	Similarity:Contains 1 F-box domain.	fbxl20	F-box and leucine rich repeat protein 20	1	1	no	0	0	0	0	0	0	0	0	0	0
EOG090C0FVP	ENSGACG00000012370	FK506 binding protein 1b	ENSONIG00000001020	Peptidyl-prolyl cis-trans isomerase	fkbp1b	FKBP prolyl isomerase 1B	1	1	no	0	0	0	0	0	0	0	0	0	0
EOG090C03AN	ENSGACG00000012341	methylmalonyl CoA mutase	ENSONIG00000001021	methylmalonyl CoA mutase	mut	methylmalonyl-CoA mutase	1	1	yes	0	0	0	0	0	0	0	0	1	0
EOG090C08PL	ENSGACG00000012337	si:ch211-223f7.1	ENSONIG00000001022	Transmembrane:Helical	opn8b	opsin-5	1	1	no	0	0	0	0	0	0	0	0	0	0
EOG090C06V2	ENSGACG00000010892	\N	ENSONIG00000001023	Uncharacterized protein	si:dkey-174i8.1	si:dkey-174i8.1	1	1	no	0	0	0	0	0	0	0	0	0	0
EOG090C06E0	ENSGACG00000012322	runt-related transcription factor 2b	ENSONIG00000001025	runt-related transcription factor 2b	runx2b	runt related transcription factor 2	1	1	no	0	0	0	0	0	0	0	0	0	0
EOG090C01G2	ENSGACG00000010901	synaptopodin 2-like a	ENSONIG00000001026	Similarity:Contains 1 PDZ (DHR) domain.	synpo2la	synaptopodin 2-like a	1	1	no	0	0	0	0	0	0	0	0	0	0
EOG090C09UL	ENSGACG00000006049;ENSGACG00000008897	SH3 and cysteine rich domain 2 ;SH3 and cysteine rich domain 2	ENSONIG00000001027;ENSONIG00000016262	Similarity:Contains 1 SH3 domain.;Similarity:Contains 1 SH3 domain.	STAC2 (1 of many);STAC2 (1 of many)	SH3 and cysteine-rich domain-containing protein 2 ;SH3 and cysteine rich domain 2	2	2	no	0	0	0	0	0	0	0	0	0	0
EOG090C0E6W	ENSGACG00000010907	myozenin 1a	ENSONIG00000001028	myozenin 1a	MYOZ1 (1 of many)	myozenin 1	1	1	no	0	0	0	0	0	0	0	0	0	0
EOG090C05MY	ENSGACG00000010922	hedgehog acyltransferase	ENSONIG00000001029	Transmembrane:Helical	hhat	hedgehog acyltransferase	1	1	no	0	0	0	0	0	0	0	0	0	0
EOG090C09K1	ENSGACG00000008889	si:dkey-208k4.2	ENSONIG00000001030	si:dkey-208k4.2	si:dkey-208k4.2	P43 5S RNA-binding protein	1	1	no	0	0	0	0	0	0	0	0	0	0
EOG090C0CNB	ENSGACG00000012318;ENSGACG00000014937	chloride intracellular channel 5b ;chloride intracellular channel 5a	ENSONIG00000001031;ENSONIG00000012034	Chloride intracellular channel protein;Chloride intracellular channel protein	clic5b;	chloride intracellular channel 5b ;chloride intracellular channel protein 5	2	2	no	0	0	0	0	0	0	0	0	0	0
EOG090C058K	ENSGACG00000007156;ENSGACG00000011361	kinesin family member 3C ;kinesin family member 3Cb	ENSONIG00000001032;ENSONIG00000005560	Kinesin-like protein;Kinesin-like protein	kif3cb;kif3ca	kinesin-like protein KIF3B ;kinesin family member 3C	2	2	no	0	0	0	0	0	0	0	0	0	0
EOG090C021Q	ENSGACG00000010928;ENSGACG00000019577	potassium voltage-gated channel, subfamily H (eag-related), member 1a ;potassium voltage-gated channel, subfamily H (eag-related), member 1b	ENSONIG00000001033;ENSONIG00000016131	Similarity:Contains cyclic nucleotide-binding domain.;Similarity:Contains cyclic nucleotide-binding domain.	kcnh1a;	potassium voltage-gated channel, subfamily H (eag-related), member 1a ;	2	2	no	0	0	0	0	0	0	0	0	0	0
EOG090C028P	ENSGACG00000006346;ENSGACG00000008875	ADAM metallopeptidase domain 11 ;ADAM metallopeptidase domain 11	ENSONIG00000001034;ENSONIG00000016306	Similarity:Contains 1 disintegrin domain.;Similarity:Contains 1 disintegrin domain.	;adam11	;ADAM metallopeptidase domain 11	2	2	no	0	0	0	0	0	0	0	0	0	0
EOG090C06P7	ENSGACG00000012313	ectonucleotide pyrophosphatase/phosphodiesterase 5	ENSONIG00000001035	Transmembrane:Helical	enpp5	ectonucleotide pyrophosphatase/phosphodiesterase 5	1	1	no	0	0	0	0	0	0	0	0	0	0
EOG090C02FB	ENSGACG00000011377	additional sex combs like transcriptional regulator 2	ENSONIG00000001036	additional sex combs like transcriptional regulator 2	asxl2	ASXL transcriptional regulator 2	1	1	no	0	0	0	0	0	0	0	0	0	0
EOG090C06B3	ENSGACG00000008282	fibroblast growth factor receptor-like 1	ENSONIG00000001038;ENSONIG00000020130	Transmembrane:Helical;Transmembrane:Helical	fgfrl1a;	fibroblast growth factor receptor like 1 ;	1	2	no	0	0	0	0	0	0	0	0	0	0
EOG090C06JE	ENSGACG00000010952	cytochrome P450, family 3, subfamily c, polypeptide 1	ENSONIG00000001039;ENSONIG00000001065;ENSONIG00000001070;ENSONIG00000019950	Similarity:Belongs to the cytochrome P450 family.;Similarity:Belongs to the cytochrome P450 family.;Similarity:Belongs to the cytochrome P450 family.;Similarity:Belongs to the cytochrome P450 family.	;;;	;;;	1	4	no	0	0	0	0	0	0	0	0	0	0
EOG090C0AMC	ENSGACG00000004524	ring finger and FYVE-like domain containing E3 ubiquitin protein ligase	ENSONIG00000001040	ring finger and FYVE-like domain containing E3 ubiquitin protein ligase	rffl	ring finger and FYVE-like domain containing E3 ubiquitin protein ligase	1	1	no	0	0	0	0	0	0	0	0	0	0
EOG090C0593	ENSGACG00000007107;ENSGACG00000011386	dystrobrevin, beta a ;dystrobrevin, beta b	ENSONIG00000001041;ENSONIG00000005550	Dystrobrevin;dystrobrevin, beta a	dtnbb;dtnba	dystrobrevin beta ;dystrobrevin beta	2	2	yes	0	0	0	0	0	0	0	0	1	0
EOG090C0ESJ	ENSGACG00000004504	eukaryotic translation initiation factor 4h	ENSONIG00000001042	eukaryotic translation initiation factor 4h	eif4h	eukaryotic translation initiation factor 4h	1	1	no	0	0	0	0	0	0	0	0	0	0
EOG090C0DQ5	ENSGACG00000016428	si:ch211-255i20.3	ENSONIG00000001043	Similarity:Belongs to the EMP24/GP25L family.	si:ch211-255i20.3	si:ch211-255i20.3	1	1	no	0	0	0	0	0	0	0	0	0	0
EOG090C099N	ENSGACG00000016431	spondin 2b, extracellular matrix protein	ENSONIG00000001044	spondin 2b, extracellular matrix protein	spon2b	spondin 2	1	1	no	0	0	0	0	0	0	0	0	0	0
EOG090C029T	ENSGACG00000004499	anoctamin 7	ENSONIG00000001045	Anoctamin	si:dkey-83h2.5	anoctamin 7	1	1	no	0	0	0	0	0	0	0	0	0	0
EOG090C07OJ	ENSGACG00000016437;ENSGACG00000018122	C-terminal binding protein 1 ;C-terminal binding protein 1	ENSONIG00000001046;ENSONIG00000012973	C-terminal binding protein 1 ;Similarity:Belongs to the D-isomer specific 2-hydroxyacid dehydrogenase family.	zgc:136929;ctbp1	C-terminal binding protein 1 ;C-terminal-binding protein 1	2	2	no	0	0	0	0	0	0	0	0	0	0
EOG090C09PF	ENSGACG00000004919	\N	ENSONIG00000001047;ENSONIG00000001121;ENSONIG00000017286	Similarity:Belongs to the G-protein coupled receptor 1 family.;Similarity:Belongs to the G-protein coupled receptor 1 family.;Similarity:Belongs to the G-protein coupled receptor 1 family.	;;	;P2Y purinoceptor 14-like ;P2Y purinoceptor 14	1	3	no	0	0	0	0	0	0	0	0	0	0
EOG090C0328	ENSGACG00000004487	endothelin converting enzyme 2b	ENSONIG00000001048	Transmembrane:Helical	ece2b	endothelin converting enzyme 2	1	1	no	0	0	0	0	0	0	0	0	0	0
EOG090C029P	ENSGACG00000011391	DNA (cytosine-5-)-methyltransferase 3 alpha b	ENSONIG00000001050	DNA (cytosine-5-)-methyltransferase 3 alpha b	dnmt3ab	DNA (cytosine-5)-methyltransferase 3A	1	1	no	0	0	0	0	0	0	0	0	0	0
EOG090C05QC	ENSGACG00000005602	T-box 18	ENSONIG00000001051	Similarity:Contains T-box DNA-binding domain.	tbx18	T-box transcription factor TBX18	1	1	no	0	0	0	0	0	0	0	0	0	0
EOG090C07U4	ENSGACG00000008867	prolyl 3-hydroxylase family member 4 (non-enzymatic)	ENSONIG00000001052	prolyl 3-hydroxylase family member 4 (non-enzymatic)	p3h4	prolyl 3-hydroxylase family member 4 (non-enzymatic)	1	1	no	0	0	0	0	0	0	0	0	0	0
EOG090C08HV	ENSGACG00000016443	macrophage erythroblast attacher	ENSONIG00000001054	Similarity:Contains CTLH domain.	maea	macrophage erythroblast attacher	1	1	no	0	0	0	0	0	0	0	0	0	0
EOG090C07Y8	ENSGACG00000005556	ethanolaminephosphotransferase 1	ENSONIG00000001055	Similarity:Belongs to the CDP-alcohol phosphatidyltransferase class-I family.	selenoi	selenoprotein I	1	1	no	0	0	0	0	0	0	0	0	0	0
EOG090C04Q6	ENSGACG00000008857	FK506 binding protein 10a	ENSONIG00000001056	FK506 binding protein 10a	fkbp10a	FKBP prolyl isomerase 10	1	1	no	0	0	0	0	0	0	0	0	0	0
EOG090C0GOX	ENSGACG00000004479	somatostatin 1, tandem duplicate 1	ENSONIG00000001057	somatostatin 1, tandem duplicate 1	sst1.1	somatostatin 1, tandem duplicate 1	1	1	yes	0	1	0	0	0	0	0	0	0	0
EOG090C093K	ENSGACG00000004458	collagen, type IV, alpha 3	ENSONIG00000001058	collagen, type IV, alpha 3		collagen alpha-5(IV) chain	1	1	no	0	0	0	0	0	0	0	0	0	0
EOG090C046Y	ENSGACG00000016452	kelch-like family member 3	ENSONIG00000001059	Similarity:Contains 1 BTB (POZ) domain.	klhl3	kelch-like family member 3	1	1	no	0	0	0	0	0	0	0	0	0	0
EOG090C01XD	ENSGACG00000005542	ATP/GTP binding protein-like 5	ENSONIG00000001060	ATP/GTP binding protein-like 5	agbl5	ATP/GTP binding protein like 5	1	1	no	0	0	0	0	0	0	0	0	0	0
EOG090C0ALT	ENSGACG00000006246;ENSGACG00000008830	5'-nucleotidase, cytosolic IIIB ;5'-nucleotidase, cytosolic IIIB	ENSONIG00000001061	5'-nucleotidase, cytosolic IIIB	NT5C3B	5'-nucleotidase, cytosolic IIIB	2	1	no	0	0	0	0	0	0	0	0	0	0
EOG090C04RP	ENSGACG00000006142	poly(A) polymerase alpha	ENSONIG00000001062	poly(A) polymerase alpha			1	1	no	0	0	0	0	0	0	0	0	0	0
EOG090C04M4	ENSGACG00000007021;ENSGACG00000011401	dihydropyrimidinase-like 5b ;dihydropyrimidinase-like 5a	ENSONIG00000001063;ENSONIG00000005535	dihydropyrimidinase-like 5a ;dihydropyrimidinase-like 5b	dpysl5a;dpysl5b	dihydropyrimidinase-related protein 5 ;dihydropyrimidinase-like 5b	2	2	yes	0	1	0	0	0	0	0	0	0	0
EOG090C04BN	ENSGACG00000008824	kelch-like family member 11	ENSONIG00000001064	Similarity:Contains 1 BTB (POZ) domain.	KLHL11 (1 of many)	kelch like family member 11	1	1	no	0	0	0	0	0	0	0	0	0	0
EOG090C01BC	ENSGACG00000006221;ENSGACG00000008812	ATP citrate lyase b ;ATP citrate lyase	ENSONIG00000001066;ENSONIG00000016287	ATP-citrate (pro-S-)-lyase;ATP-citrate (pro-S-)-lyase	ACLY (1 of many);aclyb	ATP citrate lyase ;ATP-citrate synthase	2	2	no	0	0	0	0	0	0	0	0	0	0
EOG090C03GP	ENSGACG00000005537	B-cell CLL/lymphoma 11B (zinc finger protein)	ENSONIG00000001067	B-cell CLL/lymphoma 11B (zinc finger protein)	im:7142702	B-cell lymphoma/leukemia 11B	1	1	no	0	0	0	0	0	0	0	0	0	0
EOG090C023L	ENSGACG00000016458	family with sequence similarity 13, member B	ENSONIG00000001068	family with sequence similarity 13, member B	fam13b	family with sequence similarity 13 member B	1	1	no	0	0	0	0	0	0	0	0	0	0
EOG090C09C8	ENSGACG00000005517	cyclin K	ENSONIG00000001069	Similarity:Belongs to the cyclin family.	ccnk	cyclin K	1	1	no	0	0	0	0	0	0	0	0	0	0
EOG090C0BQO	ENSGACG00000011419	microtubule-associated protein, RP/EB family, member 3a	ENSONIG00000001072;ENSONIG00000005534	microtubule-associated protein, RP/EB family, member 3a ;microtubule-associated protein, RP/EB family, member 3b	mapre3a;mapre3b	microtubule-associated protein RP/EB family member 3 ;microtubule-associated protein RP/EB family member 3	1	2	no	0	0	0	0	0	0	0	0	0	0
EOG090C05LN	ENSGACG00000008810	2',3'-cyclic nucleotide 3' phosphodiesterase	ENSONIG00000001073	2',3'-cyclic nucleotide 3' phosphodiesterase	cnp	2',3'-cyclic nucleotide 3' phosphodiesterase	1	1	no	0	0	0	0	0	0	0	0	0	0
EOG090C0639	ENSGACG00000005410	cytochrome P450, family 46, subfamily A, polypeptide 1, tandem duplicate 2	ENSONIG00000001074	Similarity:Belongs to the cytochrome P450 family.	cyp46a1.4	cholesterol 24-hydroxylase	1	1	yes	0	1	0	0	0	0	1	0	0	0
EOG090C00TU	ENSGACG00000004438	collagen, type IV, alpha 4	ENSONIG00000001075	collagen, type IV, alpha 4			1	1	no	0	0	0	0	0	0	0	0	0	0
EOG090C0688	ENSGACG00000008806	tetratricopeptide repeat domain 25	ENSONIG00000001076	tetratricopeptide repeat domain 25	ttc25	tetratricopeptide repeat domain 25	1	1	no	0	0	0	0	0	0	0	0	0	0
EOG090C0COK	ENSGACG00000005536;ENSGACG00000016472	eukaryotic translation initiation factor 4eb ;eukaryotic translation initiation factor 4ea	ENSONIG00000001077;ENSONIG00000019485	Similarity:Belongs to the eukaryotic initiation factor 4E family.;Similarity:Belongs to the eukaryotic initiation factor 4E family.	EIF4E (1 of many);eif4eb	eukaryotic translation initiation factor 4E-1A ;eukaryotic translation initiation factor 4E	2	2	no	0	0	0	0	0	0	0	0	0	0
EOG090C0849	ENSGACG00000016474	alcohol dehydrogenase 5	ENSONIG00000001078	S-(hydroxymethyl)glutathione dehydrogenase		alcohol dehydrogenase class-3	1	1	no	0	0	0	0	0	0	0	0	0	0
EOG090C05FN	ENSGACG00000013819	scavenger receptor class B, member 2	ENSONIG00000001079;ENSONIG00000016910	scavenger receptor class B, member 2 ;Transmembrane:Helical	;scarb2a	;lysosome membrane protein 2	1	2	yes	0	1	0	0	0	0	0	0	0	0
EOG090C05FA	ENSGACG00000008768	DnaJ (Hsp40) homolog, subfamily C, member 7	ENSONIG00000001080	DnaJ (Hsp40) homolog, subfamily C, member 7	dnajc7	DnaJ (Hsp40) homolog, subfamily C, member 7	1	1	no	0	0	0	0	0	0	0	0	0	0
EOG090C0DQ0	ENSGACG00000008761	NFKB inhibitor interacting Ras-like 2	ENSONIG00000001081	NFKB inhibitor interacting Ras-like 2	nkiras2	NFKB inhibitor interacting Ras like 2	1	1	no	0	0	0	0	0	0	0	0	0	0
EOG090C097D	ENSGACG00000005405	isthmin 2b	ENSONIG00000001082	isthmin 2b	ism2b	isthmin 2b	1	1	no	0	0	0	0	0	0	0	0	0	0
EOG090C056U	ENSGACG00000008756	zinc finger protein 385C	ENSONIG00000001083	zinc finger protein 385C	znf385c	zinc finger protein 385C	1	1	no	0	0	0	0	0	0	0	0	0	0
EOG090C04NB	ENSGACG00000005382;ENSGACG00000005393	serine palmitoyltransferase, long chain base subunit 2b ;serine palmitoyltransferase, long chain base subunit 2	ENSONIG00000001084;ENSONIG00000019490	Similarity:Belongs to the class-II pyridoxal-phosphate-dependent aminotransferase family.;Similarity:Belongs to the class-II pyridoxal-phosphate-dependent aminotransferase family.	sptlc2b;sptlc2a	serine palmitoyltransferase long chain base subunit 2 ;serine palmitoyltransferase 2	2	2	no	0	0	0	0	0	0	0	0	0	0
EOG090C08DV	ENSGACG00000016479	zgc:63568	ENSONIG00000001086	Similarity:Belongs to the zinc-containing alcohol dehydrogenase family.	zgc:77938	alcohol dehydrogenase class-3	1	1	yes	0	0	0	0	0	0	1	0	0	1
EOG090C02P5	ENSGACG00000004408	exocyst complex component 3-like 2b	ENSONIG00000001087	exocyst complex component 3-like 2b	exoc3l2b	exocyst complex component 3-like 2b	1	1	no	0	0	0	0	0	0	0	0	0	0
EOG090C0GG7	ENSGACG00000010717;ENSGACG00000010728	\N;\N	ENSONIG00000001088;ENSONIG00000001107	Uncharacterized protein ;Uncharacterized protein	;IGLV11-55	;immunoglobulin lambda variable 11-55 (non-functional)	2	2	no	0	0	0	0	0	0	0	0	0	0
EOG090C0GNS	ENSGACG00000001613;ENSGACG00000010718	\N;\N	ENSONIG00000001089;ENSONIG00000020739	Uncharacterized protein ;Uncharacterized protein	;	;	2	2	no	0	0	0	0	0	0	0	0	0	0
EOG090C03EN	ENSGACG00000008740	DEXH (Asp-Glu-X-His) box polypeptide 58	ENSONIG00000001090	DEXH (Asp-Glu-X-His) box polypeptide 58	dhx58	DEXH (Asp-Glu-X-His) box polypeptide 58	1	1	no	0	0	0	0	0	0	0	0	0	0
EOG090C0FAG	ENSGACG00000000561;ENSGACG00000009293;ENSGACG00000009300;ENSGACG00000009301;ENSGACG00000009313;ENSGACG00000009315;ENSGACG00000009316;ENSGACG00000009322;ENSGACG00000009327;ENSGACG00000009470;ENSGACG00000009475;ENSGACG00000009478;ENSGACG00000009480;ENSGACG00000009486;ENSGACG00000009492;ENSGACG00000009493;ENSGACG00000009497;ENSGACG00000009503;ENSGACG00000009506;ENSGACG00000009513;ENSGACG00000009519;…	\N;\N;\N;\N;\N;\N;\N;\N;\N;\N;\N;\N;\N;\N;\N;\N;\N;\N;\N;\N;\N;\N;\N	ENSONIG00000001094;ENSONIG00000017558	Uncharacterized protein ;Uncharacterized protein	;	;	23	2	no	0	0	0	0	0	0	0	0	0	0
EOG090C09PT	ENSGACG00000010657	ELAV like RNA binding protein 1	ENSONIG00000001096	ELAV-like protein	elavl1a	ELAV like RNA binding protein 1a	1	1	no	0	0	0	0	0	0	0	0	0	0
EOG090C05Y4	ENSGACG00000005310	SNW domain containing 1	ENSONIG00000001098	SNW domain containing 1	snw1	SNW domain containing 1	1	1	no	0	0	0	0	0	0	0	0	0	0
EOG090C06HJ	ENSGACG00000003329;ENSGACG00000010673	solute carrier family 1 (glutamate transporter), member 8a ;solute carrier family 1 (glutamate transporter), member 8b	ENSONIG00000001099;ENSONIG00000007318	Amino acid transporter;Amino acid transporter	slc1a8b;slc1a8a	solute carrier family 1 (glutamate transporter), member 8b ;solute carrier family 1 (glutamate transporter), member 8a	2	2	yes	0	0	0	0	0	1	1	0	0	0
EOG090C01KN	ENSGACG00000004934	suppressor of Ty 5 homolog (S. cerevisiae)	ENSONIG00000001100	Transcription elongation factor SPT5	supt5h	SPT5 homolog, DSIF elongation factor subunit	1	1	no	0	0	0	0	0	0	0	0	0	0
EOG090C031S	ENSGACG00000008679	K(lysine) acetyltransferase 2A	ENSONIG00000001102	Active Site:Proton donor/acceptor	kat2a	lysine acetyltransferase 2A	1	1	no	0	0	0	0	0	0	0	0	0	0
EOG090C0EB1	ENSGACG00000001304	desumoylating isopeptidase 2	ENSONIG00000001103	desumoylating isopeptidase 2	desi2	desumoylating isopeptidase 2	1	1	no	0	0	0	0	0	0	0	0	0	0
EOG090C07BU	ENSGACG00000001302	mitochondrial translational release factor 1-like	ENSONIG00000001104	mitochondrial translational release factor 1-like	mtrf1l	mitochondrial translational release factor 1-like	1	1	no	0	0	0	0	0	0	0	0	0	0
EOG090C0B8T	ENSGACG00000016483	paired-like homeodomain 2	ENSONIG00000001105	Similarity:Contains homeobox DNA-binding domain.	pitx2	paired like homeodomain 2	1	1	no	0	0	0	0	0	0	0	0	0	0
EOG090C00NM	ENSGACG00000005280;ENSGACG00000020140	neurexin 3b ;neurexin 3a	ENSONIG00000001106;ENSONIG00000011044	Transmembrane:Helical;Transmembrane:Helical	nrxn3b;nrxn3a	neurexin 3b ;neurexin 3a	2	2	no	0	0	0	0	0	0	0	0	0	0
EOG090C0CD1	ENSGACG00000003320;ENSGACG00000010688	receptor accessory protein 6 ;zgc:101744	ENSONIG00000001108;ENSONIG00000007314	Receptor expression-enhancing protein;Receptor expression-enhancing protein	zgc:101744;reep6	zgc:101744 ;receptor expression-enhancing protein 6	2	2	no	0	0	0	0	0	0	0	0	0	0
EOG090C0B56	ENSGACG00000016488	ELOVL fatty acid elongase 6	ENSONIG00000001109	Very-long-chain 3-oxoacyl-CoA synthase	elovl6	ELOVL fatty acid elongase 6	1	1	no	0	0	0	0	0	0	0	0	0	0
EOG090C0DKZ	ENSGACG00000001299	F-box protein 5	ENSONIG00000001110	F-box protein 5	fbxo5	F-box protein 5	1	1	no	0	0	0	0	0	0	0	0	0	0
EOG090C0FQ9	ENSGACG00000001298	vasoactive intestinal peptide	ENSONIG00000001111	vasoactive intestinal peptide	VIP	VIP peptides	1	1	yes	0	1	0	0	0	0	0	0	0	0
EOG090C011I	ENSGACG00000016495	epidermal growth factor	ENSONIG00000001112	Transmembrane:Helical	egf	epidermal growth factor	1	1	no	0	0	0	0	0	0	0	0	0	0
EOG090C0D99	ENSGACG00000008659	RAB5C, member RAS oncogene family	ENSONIG00000001113	Similarity:Belongs to the small GTPase superfamily. Rab family.	rab5c	RAB5C, member RAS oncogene family	1	1	no	0	0	0	0	0	0	0	0	0	0
EOG090C0DKF	ENSGACG00000003289;ENSGACG00000010701	DIRAS family, GTP-binding RAS-like 1a ;DIRAS family, GTP-binding RAS-like 1b	ENSONIG00000001114;ENSONIG00000007308	DIRAS family, GTP-binding RAS-like 1b ;DIRAS family, GTP-binding RAS-like 1a	diras1b;	GTP-binding protein Di-Ras1 ;GTP-binding protein Di-Ras1	2	2	yes	0	0	0	0	0	0	0	0	1	0
EOG090C00EE	ENSGACG00000001281	anaphase promoting complex subunit 1	ENSONIG00000001115	anaphase promoting complex subunit 1	anapc1	anaphase promoting complex subunit 1	1	1	no	0	0	0	0	0	0	0	0	0	0
EOG090C0EVH	ENSGACG00000010706	growth arrest and DNA-damage-inducible, beta b	ENSONIG00000001116	growth arrest and DNA-damage-inducible, beta b	gadd45bb	growth arrest and DNA damage-inducible protein GADD45 beta	1	1	no	0	0	0	0	0	0	0	0	0	0
EOG090C0139	ENSGACG00000006152;ENSGACG00000008648	potassium voltage-gated channel, subfamily H (eag-related), member 4b ;potassium voltage-gated channel, subfamily H (eag-related), member 4a	ENSONIG00000001117;ENSONIG00000016275	Similarity:Contains cyclic nucleotide-binding domain.;Similarity:Contains cyclic nucleotide-binding domain.	kcnh4a;kcnh4b	potassium voltage-gated channel subfamily H member 4 ;potassium voltage-gated channel, subfamily H (eag-related), member 4b	2	2	yes	0	0	0	0	0	1	0	0	0	0
EOG090C07F1	ENSGACG00000001319;ENSGACG00000001322;ENSGACG00000007958;ENSGACG00000009755;ENSGACG00000012548;ENSGACG00000012556;ENSGACG00000012558	\N;\N;si:ch211-197g15.9 ;zgc:153654 ;\N;\N;\N	ENSONIG00000001120;ENSONIG00000002128;ENSONIG00000002133;ENSONIG00000007509;ENSONIG00000012317;ENSONIG00000012318;ENSONIG00000012319;ENSONIG00000012749;ENSONIG00000013227;ENSONIG00000014147;ENSONIG00000015167;ENSONIG00000015247;ENSONIG00000015371;ENSONIG00000016843;ENSONIG00000017465;ENSONIG00000018790	zgc:153654 ;Uncharacterized protein ;Uncharacterized protein ;Uncharacterized protein ;Uncharacterized protein ;Uncharacterized protein ;Uncharacterized protein ;Uncharacterized protein ;Uncharacterized protein ;Uncharacterized protein ;Uncharacterized protein ;Uncharacterized protein ;Uncharacterized protein ;Uncharacterized protein ;Uncharacterized protein ;Uncharacterized protein	;;;;;;;;;;;;;;;	interferon-induced protein 44 ;;;;;interferon-induced protein 44-like ;;;;;;;;;;interferon-induced protein 44	7	16	yes	0	1	0	0	0	0	0	0	0	0
EOG090C02SP	ENSGACG00000004907	SH3KBP1 binding protein 1	ENSONIG00000001123	Similarity:Contains 1 BTB (POZ) domain.	SHKBP1	SH3KBP1 binding protein 1	1	1	no	0	0	0	0	0	0	0	0	0	0
EOG090C06A8	ENSGACG00000016496	info leucine-rich repeat, immunoglobulin-like and transmembrane domains 3a	ENSONIG00000001124	Similarity:Contains LRRCT domain.	lrit3a	leucine-rich repeat, immunoglobulin-like domain and transmembrane domain-containing protein 3	1	1	yes	0	0	0	0	0	1	1	0	0	0
EOG090C00ZK	ENSGACG00000009771	microtubule-associated protein 1Sb	ENSONIG00000001125	microtubule-associated protein 1Sb			1	1	no	0	0	0	0	0	0	0	0	0	0
EOG090C09CO	ENSGACG00000010279	solute carrier family 16, member 12b	ENSONIG00000001126;ENSONIG00000019116	Transmembrane:Helical;Transmembrane:Helical	slc16a12a;slc16a12b	solute carrier family 16, member 12a ;solute carrier family 16, member 12b	1	2	no	0	0	0	0	0	0	0	0	0	0
EOG090C0B7W	ENSGACG00000016498	glycoprotein M6Aa	ENSONIG00000001127	Transmembrane:Helical	gpm6aa	glycoprotein M6Aa	1	1	no	0	0	0	0	0	0	0	0	0	0
EOG090C01EE	ENSGACG00000008641	si:ch211-210g13.5	ENSONIG00000001129	Phosphoinositide phospholipase C	si:ch211-210g13.5	si:ch211-210g13.5	1	1	no	0	0	0	0	0	0	0	0	0	0
EOG090C0G92	ENSGACG00000009780	CART prepropeptide	ENSONIG00000001130;ENSONIG00000007303	CART prepropeptide ;CART prepropeptide	cart1;	cocaine- and amphetamine-regulated transcript protein ;cocaine- and amphetamine-regulated transcript protein	1	2	no	0	0	0	0	0	0	0	0	0	0
EOG090C02RP	ENSGACG00000008634;ENSGACG00000015405	signal transducer and activator of transcription 5a ;signal transducer and activator of transcription 5b	ENSONIG00000001131;ENSONIG00000007261	Signal transducer and activator of transcription;Signal transducer and activator of transcription	stat5a;	signal transducer and activator of transcription 5B ;	2	2	no	0	0	0	0	0	0	0	0	0	0
EOG090C0D79	ENSGACG00000009787	coiled-coil domain containing 94	ENSONIG00000001132	coiled-coil domain containing 94	yju2	YJU2 splicing factor homolog	1	1	no	0	0	0	0	0	0	0	0	0	0
EOG090C0232	ENSGACG00000005269	centrosomal protein 128	ENSONIG00000001133	centrosomal protein 128	CEP128	centrosomal protein 128	1	1	no	0	0	0	0	0	0	0	0	0	0
EOG090C0ALO	ENSGACG00000004898	estrogen-related receptor delta	ENSONIG00000001134	Similarity:Belongs to the nuclear hormone receptor family.	esrrd	estrogen-related receptor delta	1	1	no	0	0	0	0	0	0	0	0	0	0
EOG090C08HN	ENSGACG00000009807	Src homology 2 domain containing transforming protein D, a	ENSONIG00000001135	Src homology 2 domain containing transforming protein D, a	shda	SH2 domain-containing adapter protein F	1	1	no	0	0	0	0	0	0	0	0	0	0
EOG090C0C0W	ENSGACG00000009810;ENSGACG00000011516	phosphatidic acid phosphatase type 2C ;phosphatidic acid phosphatase type 2Cb	ENSONIG00000001138;ENSONIG00000002238	Transmembrane:Helical;Transmembrane:Helical	plpp2a;plpp2b	phospholipid phosphatase 2a ;phospholipid phosphatase 2	2	2	no	0	0	0	0	0	0	0	0	0	0
EOG090C0BYZ	ENSGACG00000003395;ENSGACG00000016432;ENSGACG00000016501	ankyrin repeat and SOCS box containing 11 ;\N;ankyrin repeat and SOCS box containing 5	ENSONIG00000001140;ENSONIG00000014292	Similarity:Contains 6 ANK repeats.;Similarity:Contains 6 ANK repeats.	asb5a;asb11	ankyrin repeat and SOCS box containing 5a ;ankyrin repeat and SOCS box containing 11	3	2	no	0	0	0	0	0	0	0	0	0	0
EOG090C0EW7	ENSGACG00000009819	chico	ENSONIG00000001141;ENSONIG00000002273	Groucho/TLE, N-terminal Q-rich domain;Groucho/TLE, N-terminal Q-rich domain	chico;aes	amino-terminal enhancer of split ;amino-terminal enhancer of split	1	2	no	0	0	0	0	0	0	0	0	0	0
EOG090C0BT6	ENSGACG00000000057	zgc:65997	ENSONIG00000001142	Similarity:Belongs to the short-chain dehydrogenases/reductases (SDR) family.	zgc:65997	C-factor	1	1	no	0	0	0	0	0	0	0	0	0	0
EOG090C0374	ENSGACG00000005233	thyroid stimulating hormone receptor	ENSONIG00000001143	Thyrotropin receptor	tshr	thyroid stimulating hormone receptor	1	1	no	0	0	0	0	0	0	0	0	0	0
EOG090C0FEW	ENSGACG00000014518	mal, T-cell differentiation protein	ENSONIG00000001144	Transmembrane:Helical	MAL (1 of many)	mal, T cell differentiation protein	1	1	no	0	0	0	0	0	0	0	0	0	0
EOG090C0EMS	ENSGACG00000019562	mal, T-cell differentiation protein	ENSONIG00000001145;ENSONIG00000015989	Transmembrane:Helical;Transmembrane:Helical	MAL (1 of many);zgc:153665	mal, T cell differentiation protein like ;myelin and lymphocyte protein	1	2	no	0	0	0	0	0	0	0	0	0	0
EOG090C08Z2	ENSGACG00000009827;ENSGACG00000011473	guanine nucleotide binding protein (G protein), alpha 11b (Gq class) ;guanine nucleotide binding protein (G protein), alpha 11a (Gq class)	ENSONIG00000001147	guanine nucleotide binding protein (G protein), alpha 11b (Gq class)	gna11b	guanine nucleotide-binding protein G(q) subunit alpha	2	1	yes	0	0	0	0	0	0	0	0	1	0
EOG090C02L1	ENSGACG00000008607	signal transducer and activator of transcription 3 (acute-phase response factor)	ENSONIG00000001148	Signal transducer and activator of transcription	stat3	signal transducer and activator of transcription 3	1	1	no	0	0	0	0	0	0	0	0	0	0
EOG090C07PA	ENSGACG00000016513	tryptophan 2,3-dioxygenase b	ENSONIG00000001149	Tryptamin 2,3-dioxygenase	tdo2a	tryptophan 2,3-dioxygenase a	1	1	no	0	0	0	0	0	0	0	0	0	0
EOG090C0A5P	ENSGACG00000000216	mitochondrial ribosomal protein S5	ENSONIG00000001150	Similarity:Belongs to the ribosomal protein S5P family.	mrps5	mitochondrial ribosomal protein S5	1	1	no	0	0	0	0	0	0	0	0	0	0
EOG090C004L	ENSGACG00000016390;ENSGACG00000016524	teneurin transmembrane protein 3 ;teneurin transmembrane protein 3	ENSONIG00000001151;ENSONIG00000016025	Transmembrane:Helical;Transmembrane:Helical	si:dkey-237h12.3;	teneurin transmembrane protein 3 ;teneurin-3	2	2	no	0	0	0	0	0	0	0	0	0	0
EOG090C09XY	ENSGACG00000009853;ENSGACG00000013739	\N;\N	ENSONIG00000001152	Uncharacterized protein		putative nuclease HARBI1	2	1	no	0	0	0	0	0	0	0	0	0	0
EOG090C09EL	ENSGACG00000009855	tubulin polyglutamylase complex subunit 1	ENSONIG00000001154	tubulin polyglutamylase complex subunit 1	zgc:92789	tubulin polyglutamylase complex subunit 1	1	1	no	0	0	0	0	0	0	0	0	0	0
EOG090C0536	ENSGACG00000009858	inositol-3-phosphate synthase 1	ENSONIG00000001155	inositol-3-phosphate synthase 1	ISYNA1	inositol-3-phosphate synthase 1	1	1	no	0	0	0	0	0	0	0	0	0	0
EOG090C0F15	ENSGACG00000005224	general transcription factor IIA, 1	ENSONIG00000001156	general transcription factor IIA, 1	gtf2a1	general transcription factor IIA, 1	1	1	no	0	0	0	0	0	0	0	0	0	0
EOG090C0DE2	ENSGACG00000009899	programmed cell death 10b	ENSONIG00000001157	programmed cell death 10b	pdcd10b	programmed cell death 10b	1	1	no	0	0	0	0	0	0	0	0	0	0
EOG090C0AG8	ENSGACG00000004890	integrin-linked kinase-associated serine/threonine phosphatase	ENSONIG00000001159	Similarity:Belongs to the PP2C family.	ilkap	integrin-linked kinase-associated serine/threonine phosphatase	1	1	no	0	0	0	0	0	0	0	0	0	0
EOG090C077P	ENSGACG00000000580;ENSGACG00000009921;ENSGACG00000014737	\N;\N;\N	ENSONIG00000001160	si:ch73-211l2.1	si:dkey-56i24.1	si:dkey-56i24.1	3	1	yes	0	0	0	0	0	0	0	0	1	0
EOG090C08ZR	ENSGACG00000005206	potassium channel, subfamily K, member 13b	ENSONIG00000001161	Similarity:Belongs to the two pore domain potassium channel (TC 1.A.1.8) family.	kcnk13b	potassium two pore domain channel subfamily K member 13	1	1	no	0	0	0	0	0	0	0	0	0	0
EOG090C03CS	ENSGACG00000009924	SLIT and NTRK-like family, member 3b	ENSONIG00000001162	Transmembrane:Helical	slitrk3b	SLIT and NTRK-like family, member 3b	1	1	no	0	0	0	0	0	0	0	0	0	0
EOG090C07M7	ENSGACG00000005162	proteasome (prosome, macropain) 26S subunit, ATPase, 1a	ENSONIG00000001163	Similarity:Belongs to the AAA ATPase family.	psmc1a	proteasome 26S subunit, ATPase 1	1	1	no	0	0	0	0	0	0	0	0	0	0
EOG090C04WJ	ENSGACG00000004876	zgc:162872	ENSONIG00000001164	Similarity:Contains 1 PH domain.	zgc:162872	zgc:162872	1	1	no	0	0	0	0	0	0	0	0	0	0
EOG090C02AT	ENSGACG00000012107	mitogen-activated protein kinase kinase kinase kinase 3a	ENSONIG00000001166	Mitogen-activated protein kinase kinase kinase kinase	map4k3b	mitogen-activated protein kinase kinase kinase kinase 3b	1	1	no	0	0	0	0	0	0	0	0	0	0
EOG090C01IP	ENSGACG00000003577;ENSGACG00000009929	nardilysin b (N-arginine dibasic convertase) ;nardilysin a (N-arginine dibasic convertase)	ENSONIG00000001167;ENSONIG00000004642	Similarity:Belongs to the peptidase M16 family.;Similarity:Belongs to the peptidase M16 family.	nrd1a;NRDC	nardilysin a (N-arginine dibasic convertase) ;nardilysin	2	2	no	0	0	0	0	0	0	0	0	0	0
EOG090C0F12	ENSGACG00000002605;ENSGACG00000005112;ENSGACG00000009604;ENSGACG00000012607	\N;calmodulin 3b (phosphorylase kinase, delta) ;\N;calmodulin 3a (phosphorylase kinase, delta)	ENSONIG00000001168;ENSONIG00000003032;ENSONIG00000005972;ENSONIG00000019507	EF-Hand 1, calcium-binding site;EF-Hand 1, calcium-binding site;calmodulin 1a ;calmodulin 3b (phosphorylase kinase, delta)	calm1b;calm2a;calm3a;	calmodulin 1b ;calmodulin 2 ;calmodulin 2 ;calmodulin 2	4	4	yes	0	1	0	0	0	0	0	0	0	0
EOG090C0BKL	ENSGACG00000005093	breast cancer metastasis-suppressor 1-like b	ENSONIG00000001169	breast cancer metastasis-suppressor 1-like b	brms1lb	breast cancer metastasis-suppressor 1-like protein-A	1	1	no	0	0	0	0	0	0	0	0	0	0
EOG090C0ATB	ENSGACG00000004875	WD repeat domain 74	ENSONIG00000001170	WD repeat domain 74	wdr74	WD repeat domain 74	1	1	no	0	0	0	0	0	0	0	0	0	0
EOG090C04XE	ENSGACG00000004866	IWS1 homolog (S. cerevisiae)	ENSONIG00000001171	IWS1 homolog (S. cerevisiae)		IWS1, SUPT6H interacting protein	1	1	no	0	0	0	0	0	0	0	0	0	0
EOG090C0BY8	ENSGACG00000005022;ENSGACG00000012527	proteasome (prosome, macropain) subunit, alpha type, 6 ;proteasome (prosome, macropain) subunit, alpha type, 6a	ENSONIG00000001172;ENSONIG00000019500	Proteasome subunit alpha type;Proteasome subunit alpha type	psma6b;psma6a	proteasome subunit alpha type-6 ;proteasome subunit alpha 6	2	2	no	0	0	0	0	0	0	0	0	0	0
EOG090C0AF8	ENSGACG00000016536	aspartylglucosaminidase	ENSONIG00000001173	aspartylglucosaminidase	aga	aspartylglucosaminidase	1	1	no	0	0	0	0	0	0	0	0	0	0
EOG090C0524	ENSGACG00000004395	interleukin 1 receptor accessory protein	ENSONIG00000001175	Transmembrane:Helical			1	1	no	0	0	0	0	0	0	0	0	0	0
EOG090C045G	ENSGACG00000016544	nei-like DNA glycosylase 3	ENSONIG00000001176	nei-like DNA glycosylase 3	neil3	nei like DNA glycosylase 3	1	1	yes	0	0	0	0	0	1	0	0	0	0
EOG090C0A3N	ENSGACG00000008605	polymerase I and transcript release factor a	ENSONIG00000001177	polymerase I and transcript release factor a	cavin1a	caveolae-associated protein 1	1	1	no	0	0	0	0	0	0	0	0	0	0
EOG090C0AXW	ENSGACG00000005065	nuclear factor of kappa light polypeptide gene enhancer in B-cells inhibitor, alpha a	ENSONIG00000001178	Similarity:Contains 5 ANK repeats.	nfkbiaa	NF-kappa-B inhibitor alpha	1	1	yes	0	0	0	0	0	0	0	0	1	0
EOG090C02A3	ENSGACG00000008553;ENSGACG00000015401	ATPase, H+ transporting, lysosomal V0 subunit a1a ;ATPase, H+ transporting, lysosomal V0 subunit a1b	ENSONIG00000001179;ENSONIG00000007252	V-type proton ATPase subunit a;V-type proton ATPase subunit a	atp6v0a1a;atp6v0a1b	V-type proton ATPase 116 kDa subunit a ;V-type proton ATPase 116 kDa subunit a	2	2	yes	0	0	0	0	0	1	0	0	1	0
EOG090C03MW	ENSGACG00000012095	Rho guanine nucleotide exchange factor (GEF) 33	ENSONIG00000001180	Rho guanine nucleotide exchange factor (GEF) 33	arhgef33	Rho guanine nucleotide exchange factor 33	1	1	no	0	0	0	0	0	0	0	0	0	0
EOG090C06JV	ENSGACG00000012086	solute carrier family 17 (acidic sugar transporter), member 5	ENSONIG00000001181	Transmembrane:Helical	slc17a5	solute carrier family 17 member 5	1	1	no	0	0	0	0	0	0	0	0	0	0
EOG090C09KN	ENSGACG00000016550	platelet derived growth factor C	ENSONIG00000001182	Similarity:Belongs to the PDGF/VEGF growth factor family.	pdgfc	platelet derived growth factor C	1	1	no	0	0	0	0	0	0	0	0	0	0
EOG090C0F4N	ENSGACG00000005017	family with sequence similarity 177, member A1	ENSONIG00000001183	family with sequence similarity 177, member A1	zgc:153383	protein FAM177A1	1	1	no	0	0	0	0	0	0	0	0	0	0
EOG090C06N3	ENSGACG00000016232;ENSGACG00000016556	\N;glycine receptor, beta b	ENSONIG00000001184;ENSONIG00000016063	Similarity:Belongs to the ligand-gated ion channel (TC 1.A.9) family.;Similarity:Belongs to the ligand-gated ion channel (TC 1.A.9) family.	glrbb;glrba	glycine receptor, beta b ;glycine receptor subunit beta	2	2	yes	0	1	0	0	0	0	0	0	0	0
EOG090C09GZ	ENSGACG00000004940	serpin peptidase inhibitor, clade A (alpha-1 antiproteinase, antitrypsin), member 1	ENSONIG00000001185;ENSONIG00000001186;ENSONIG00000001190	Similarity:Belongs to the serpin family.;Similarity:Belongs to the serpin family.;Similarity:Belongs to the serpin family.	;;	;alpha-1-antitrypsin homolog ;alpha-1-antitrypsin homolog	1	3	no	0	0	0	0	0	0	0	0	0	0
EOG090C06N5	ENSGACG00000018090	eukaryotic translation elongation factor 1 alpha 1a	ENSONIG00000001187;ENSONIG00000008977	Elongation factor 1-alpha;Elongation factor 1-alpha	;eef1a1b	;elongation factor 1-alpha 1	1	2	no	0	0	0	0	0	0	0	0	0	0
EOG090C08X7	ENSGACG00000008544	zgc:153952	ENSONIG00000001189	zgc:153952	stk17al	serine/threonine-protein kinase 17A	1	1	no	0	0	0	0	0	0	0	0	0	0
EOG090C0F1N	ENSGACG00000009949	family with sequence similarity 163, member A	ENSONIG00000001191	Transmembrane:Helical			1	1	no	0	0	0	0	0	0	0	0	0	0
EOG090C0D73	ENSGACG00000007940;ENSGACG00000009955	RAB GTPase activating protein 1-like ;RAB GTPase activating protein 1-like 2	ENSONIG00000001192	RAB GTPase activating protein 1-like 2	rabgap1l2	RAB GTPase activating protein 1-like 2	2	1	no	0	0	0	0	0	0	0	0	0	0
EOG090C020X	ENSGACG00000016558;ENSGACG00000018071	glutamate receptor, ionotropic, AMPA 2b ;glutamate receptor, ionotropic, AMPA 2a	ENSONIG00000001193;ENSONIG00000016067	Transmembrane:Helical;Transmembrane:Helical	gria2b;	glutamate receptor, ionotropic, AMPA 2b ;glutamate receptor subunit 2A	2	2	no	0	0	0	0	0	0	0	0	0	0
EOG090C0BA3	ENSGACG00000008535	hydroxysteroid (17-beta) dehydrogenase 1	ENSONIG00000001194	Active Site:Proton acceptor	hsd17b1	hydroxysteroid 17-beta dehydrogenase 1	1	1	no	0	0	0	0	0	0	0	0	0	0
EOG090C05CY	ENSGACG00000012072	DEAD (Asp-Glu-Ala-Asp) box polypeptide 43	ENSONIG00000001195	Similarity:Belongs to the DEAD box helicase family.	ddx43	DEAD-box helicase 43	1	1	no	0	0	0	0	0	0	0	0	0	0
EOG090C0BKN	ENSGACG00000011561	outer dense fiber of sperm tails 3-like 2	ENSONIG00000001196;ENSONIG00000002207	outer dense fiber of sperm tails 3-like 2 ;outer dense fiber of sperm tails 3-like 2	odf3l2a;odf3l2b	outer dense fiber protein 3-like protein 2 ;outer dense fiber of sperm tails 3-like 2b	1	2	no	0	0	0	0	0	0	0	0	0	0
EOG090C05N8	ENSGACG00000004405	Mab-21 domain containing 2	ENSONIG00000001197	Mab-21 domain containing 2	mb21d2	Mab-21 domain containing 2	1	1	no	0	0	0	0	0	0	0	0	0	0
EOG090C0EOY	ENSGACG00000009963	Epstein-Barr virus induced 3	ENSONIG00000001198	Epstein-Barr virus induced 3	ebi3	Epstein-Barr virus induced 3	1	1	yes	0	0	0	0	0	1	0	0	1	0
EOG090C0FDT	ENSGACG00000004913	glutaredoxin 5 homolog (S. cerevisiae)	ENSONIG00000001199	glutaredoxin 5 homolog (S. cerevisiae)	glrx5	glutaredoxin 5 homolog (S. cerevisiae)	1	1	no	0	0	0	0	0	0	0	0	0	0
EOG090C0CD0	ENSGACG00000008532	si:ch73-141c7.1	ENSONIG00000001200	si:ch73-141c7.1	si:ch73-141c7.1	coenzyme Q-binding protein COQ10 homolog, mitochondrial	1	1	no	0	0	0	0	0	0	0	0	0	0
EOG090C08GP	ENSGACG00000004417	presenilin associated, rhomboid-like	ENSONIG00000001201	Rhomboid-like protein			1	1	no	0	0	0	0	0	0	0	0	0	0
EOG090C040D	ENSGACG00000004893	integrator complex subunit 9	ENSONIG00000001202	integrator complex subunit 9	ints9	integrator complex subunit 9	1	1	no	0	0	0	0	0	0	0	0	0	0
EOG090C029L	ENSGACG00000002123;ENSGACG00000008527	\N;si:dkey-194j22.6	ENSONIG00000001203;ENSONIG00000016230;ENSONIG00000019875	si:dkey-194j22.6 ;Uncharacterized protein ;si:dkey-194j22.6	mylk5;;	myosin, light chain kinase 5 ;;	2	3	yes	0	0	0	0	0	1	0	0	0	1
EOG090C07SV	ENSGACG00000009968;ENSGACG00000012496	cytokine receptor-like factor 1a ;cytokine receptor-like factor 1b	ENSONIG00000001204;ENSONIG00000004752	cytokine receptor-like factor 1a ;cytokine receptor-like factor 1b	crlf1a;crlf1b	cytokine receptor-like factor 1a ;cytokine receptor-like factor 1	2	2	no	0	0	0	0	0	0	0	0	0	0
EOG090C04DS	ENSGACG00000009976	kelch-like ECH-associated protein 1a	ENSONIG00000001205	Similarity:Contains 1 BTB (POZ) domain.	keap1a	kelch-like ECH-associated protein 1	1	1	yes	0	0	0	0	0	0	0	0	1	0
EOG090C0EOD	ENSGACG00000008519	coiled-coil domain containing 43	ENSONIG00000001206	coiled-coil domain containing 43	ccdc43	coiled-coil domain containing 43	1	1	no	0	0	0	0	0	0	0	0	0	0
EOG090C04U2	ENSGACG00000013482	deltaC	ENSONIG00000001208	Delta-like protein	dlc	deltaC	1	1	no	0	0	0	0	0	0	0	0	0	0
EOG090C02EY	ENSGACG00000012068;ENSGACG00000018097	potassium voltage-gated channel, KQT-like subfamily, member 5a ;potassium voltage-gated channel, KQT-like subfamily, member 5b	ENSONIG00000001209;ENSONIG00000008979	Transmembrane:Helical;Transmembrane:Helical	;kcnq5b	;potassium voltage-gated channel, KQT-like subfamily, member 5b	2	2	no	0	0	0	0	0	0	0	0	0	0
EOG090C0DNQ	ENSGACG00000008517	complement component 1, q subcomponent-like 3b	ENSONIG00000001210	Similarity:Contains C1q domain.	c1ql3b	C1q-related factor	1	1	no	0	0	0	0	0	0	0	0	0	0
EOG090C02XK	ENSGACG00000008492	enhancer of zeste 1 polycomb repressive complex 2 subunit	ENSONIG00000001211	Similarity:Contains 1 SET domain.	EZH1	enhancer of zeste 1 polycomb repressive complex 2 subunit	1	1	no	0	0	0	0	0	0	0	0	0	0
EOG090C06O6	ENSGACG00000004825	phospholipase A2, group VII (platelet-activating factor acetylhydrolase, plasma)	ENSONIG00000001212	Active Site:Charge relay system	pla2g7	phospholipase A2, group VII (platelet-activating factor acetylhydrolase, plasma)	1	1	no	0	0	0	0	0	0	0	0	0	0
EOG090C0EII	ENSGACG00000012052	cannabinoid receptor interacting protein 1b	ENSONIG00000001213	cannabinoid receptor interacting protein 1b	CNRIP1 (1 of many)	cannabinoid receptor interacting protein 1	1	1	no	0	0	0	0	0	0	0	0	0	0
EOG090C05SG	ENSGACG00000011988	WD repeat domain 92	ENSONIG00000001214	WD repeat domain 92	wdr92	WD repeat domain 92	1	1	no	0	0	0	0	0	0	0	0	0	0
EOG090C0D9M	ENSGACG00000009986;ENSGACG00000012509	single stranded DNA binding protein 4 ;single stranded DNA binding protein 4	ENSONIG00000001215;ENSONIG00000004761	single stranded DNA binding protein 4 ;single stranded DNA binding protein 4	;ssbp4	;single-stranded DNA-binding protein 3	2	2	yes	0	0	0	0	0	0	0	0	1	0
EOG090C09X9	ENSGACG00000013476	translocase of inner mitochondrial membrane 50 homolog (S. cerevisiae)	ENSONIG00000001216	Similarity:Contains FCP1 homology domain.	timm50	translocase of inner mitochondrial membrane 50 homolog (S. cerevisiae)	1	1	no	0	0	0	0	0	0	0	0	0	0
EOG090C0CRN	ENSGACG00000019470	zgc:173443	ENSONIG00000001217;ENSONIG00000009426;ENSONIG00000012073	Uncharacterized protein ;Uncharacterized protein ;Uncharacterized protein	;;	;;	1	3	yes	1	1	1	0	0	0	0	0	0	0
EOG090C009O	ENSGACG00000004820	tudor domain containing 6	ENSONIG00000001218	tudor domain containing 6	tdrd6	tudor domain containing 6	1	1	no	0	0	0	0	0	0	0	0	0	0
EOG090C0FU3	ENSGACG00000004803	splicing factor 3b, subunit 6	ENSONIG00000001219	splicing factor 3b, subunit 6	sf3b6	splicing factor 3b subunit 6	1	1	no	0	0	0	0	0	0	0	0	0	0
EOG090C05LJ	ENSGACG00000013467	CAP-GLY domain containing linker protein 3	ENSONIG00000001221	Similarity:Contains 3 ANK repeats.	clip3	CAP-GLY domain containing linker protein 3	1	1	no	0	0	0	0	0	0	0	0	0	0
EOG090C06Q7	ENSGACG00000016571	family with sequence similarity 198, member B	ENSONIG00000001222	Transmembrane:Helical	gask1b	golgi associated kinase 1B	1	1	no	0	0	0	0	0	0	0	0	0	0
EOG090C0CQT	ENSGACG00000012047	partner of NOB1 homolog	ENSONIG00000001223	partner of NOB1 homolog	pno1	partner of NOB1 homolog	1	1	no	0	0	0	0	0	0	0	0	0	0
EOG090C08MM	ENSGACG00000016577	transmembrane protein 144b	ENSONIG00000001224	Transmembrane:Helical	tmem144b	transmembrane protein 144b	1	1	no	0	0	0	0	0	0	0	0	0	0
EOG090C04IR	ENSGACG00000009995	elongation factor RNA polymerase II	ENSONIG00000001226	elongation factor RNA polymerase II		RNA polymerase II elongation factor ELL	1	1	no	0	0	0	0	0	0	0	0	0	0
EOG090C00P3	ENSGACG00000008483	contactin associated protein 1	ENSONIG00000001227	Similarity:Contains 1 F5/8 type C domain.	cntnap1	contactin associated protein 1	1	1	no	0	0	0	0	0	0	0	0	0	0
EOG090C0A1V	ENSGACG00000013456	\N	ENSONIG00000001229	si:ch211-137a8.4			1	1	no	0	0	0	0	0	0	0	0	0	0
EOG090C08LI	ENSGACG00000004722	F-box protein 16	ENSONIG00000001230	Similarity:Contains 1 F-box domain.	fbxo16	F-box protein 16	1	1	no	0	0	0	0	0	0	0	0	0	0
EOG090C08JP	ENSGACG00000013443	\N	ENSONIG00000001231	Transmembrane:Helical	zgc:162698	transmembrane protein 87A	1	1	no	0	0	0	0	0	0	0	0	0	0
EOG090C05AO	ENSGACG00000010002	D-2-hydroxyglutarate dehydrogenase	ENSONIG00000001232	D-2-hydroxyglutarate dehydrogenase	d2hgdh	D-2-hydroxyglutarate dehydrogenase	1	1	no	0	0	0	0	0	0	0	0	0	0
EOG090C0FRX	ENSGACG00000011981	C1D nuclear receptor corepressor	ENSONIG00000001233	C1D nuclear receptor corepressor	c1d	C1D nuclear receptor corepressor	1	1	no	0	0	0	0	0	0	0	0	0	0
EOG090C03M6	ENSGACG00000004714;ENSGACG00000016253	frizzled class receptor 3a ;frizzled class receptor 3b	ENSONIG00000001234;ENSONIG00000017139	Similarity:Contains FZ (frizzled) domain.;Similarity:Contains FZ (frizzled) domain.	fzd3a;	frizzled class receptor 3 ;frizzled-3	2	2	no	0	0	0	0	0	0	0	0	0	0
EOG090C06R8	ENSGACG00000010017	activin A receptor, type I like	ENSONIG00000001235	Receptor protein serine/threonine kinase	acvr1l	activin receptor type-1	1	1	no	0	0	0	0	0	0	0	0	0	0
EOG090C02MA	ENSGACG00000016581	relaxin/insulin-like family peptide receptor 1	ENSONIG00000001237	Transmembrane:Helical	rxfp1	relaxin family peptide receptor 1	1	1	no	0	0	0	0	0	0	0	0	0	0
EOG090C0DOH	ENSGACG00000013438;ENSGACG00000020174	\N;calpain, small subunit 1 b	ENSONIG00000001239;ENSONIG00000015813	Uncharacterized protein ;calpain, small subunit 1 b	CAPNS1;capns1b	calpain small subunit 1 ;calpain small subunit 1	2	2	yes	0	0	0	0	0	1	0	0	0	0
EOG090C087Q	ENSGACG00000010021	otolith matrix protein	ENSONIG00000001240	otolith matrix protein	otomp	otolith matrix protein 1	1	1	no	0	0	0	0	0	0	0	0	0	0
EOG090C08G5	ENSGACG00000010025	heparan sulfate 6-O-sulfotransferase 1b	ENSONIG00000001241	Transmembrane:Helical	hs6st1b	heparan sulfate 6-O-sulfotransferase 1b	1	1	no	0	0	0	0	0	0	0	0	0	0
EOG090C00NU	ENSGACG00000010029	UDP-glucose glycoprotein glucosyltransferase 1	ENSONIG00000001242	UDP-glucose glycoprotein glucosyltransferase 1	uggt1	UDP-glucose glycoprotein glucosyltransferase 1	1	1	no	0	0	0	0	0	0	0	0	0	0
EOG090C08OX	ENSGACG00000000163	sprouty-related, EVH1 domain containing 2a	ENSONIG00000001243	sprouty-related, EVH1 domain containing 2a	SPRED2 (1 of many)	sprouty related EVH1 domain containing 2	1	1	no	0	0	0	0	0	0	0	0	0	0
EOG090C02KJ	ENSGACG00000008473	pleckstrin homology domain containing, family H (with MyTH4 domain) member 3	ENSONIG00000001244	pleckstrin homology domain containing, family H (with MyTH4 domain) member 3	si:ch211-18i17.2	pleckstrin homology, MyTH4 and FERM domain containing H3	1	1	no	0	0	0	0	0	0	0	0	0	0
EOG090C0872	ENSGACG00000000162;ENSGACG00000019661	ARP2 actin-related protein 2 homolog (yeast) ;ARP2 actin-related protein 2a homolog (yeast)	ENSONIG00000001245	Similarity:Belongs to the actin family.	actr2a	ARP2 actin related protein 2 homolog	2	1	no	0	0	0	0	0	0	0	0	0	0
EOG090C06UW	ENSGACG00000008462	tubulin, gamma 1	ENSONIG00000001246	Tubulin gamma chain	tubg1	tubulin gamma 1	1	1	no	0	0	0	0	0	0	0	0	0	0
EOG090C03OP	ENSGACG00000016587	electron-transferring-flavoprotein dehydrogenase	ENSONIG00000001247	Transmembrane:Helical	etfdh	electron transfer flavoprotein dehydrogenase	1	1	no	0	0	0	0	0	0	0	0	0	0
EOG090C0E9V	ENSGACG00000000160	lectin, galactoside-binding-like b	ENSONIG00000001248	Galectin	lgalslb	galectin like	1	1	no	0	0	0	0	0	0	0	0	0	0
EOG090C0DCL	ENSGACG00000013425	zgc:101731	ENSONIG00000001249	Synaptosomal-associated protein	zgc:101731	zgc:101731	1	1	no	0	0	0	0	0	0	0	0	0	0
EOG090C07CM	ENSGACG00000008434	family with sequence similarity 134, member C	ENSONIG00000001251	Transmembrane:Helical	retreg3	reticulophagy regulator family member 3	1	1	no	0	0	0	0	0	0	0	0	0	0
EOG090C0B4P	ENSGACG00000013423	nuclear apoptosis inducing factor 1	ENSONIG00000001252	nuclear apoptosis inducing factor 1	zgc:113149	zgc:113149	1	1	no	0	0	0	0	0	0	0	0	0	0
EOG090C08VL	ENSGACG00000004693	lefty1	ENSONIG00000001253	Similarity:Belongs to the TGF-beta family.	lft1	lefty1	1	1	no	0	0	0	0	0	0	0	0	0	0
EOG090C05JA	ENSGACG00000000991;ENSGACG00000019607	UDP-glucose pyrophosphorylase 2b ;UDP-glucose pyrophosphorylase 2a	ENSONIG00000001254;ENSONIG00000016000	UDP-glucose pyrophosphorylase 2b ;UDP-glucose pyrophosphorylase 2a	ugp2b;ugp2a	UDP-glucose pyrophosphorylase 2 ;UTP--glucose-1-phosphate uridylyltransferase	2	2	no	0	0	0	0	0	0	0	0	0	0
EOG090C08UI	ENSGACG00000016609	peptidylprolyl isomerase D	ENSONIG00000001255	Catalytic Activity:Peptidylproline (omega=180) = peptidylproline (omega=0).	ppid	peptidylprolyl isomerase D	1	1	no	0	0	0	0	0	0	0	0	0	0
EOG090C04KY	ENSGACG00000013416	leucine rich repeat and fibronectin type III domain containing 3	ENSONIG00000001256	Similarity:Contains LRRCT domain.	zmp:0000001073	leucine-rich repeat and fibronectin type III domain-containing protein 1-like protein	1	1	no	0	0	0	0	0	0	0	0	0	0
EOG090C0D8S	ENSGACG00000014224	PSMC3 interacting protein	ENSONIG00000001257	PSMC3 interacting protein	psmc3ip	PSMC3 interacting protein	1	1	no	0	0	0	0	0	0	0	0	0	0
EOG090C0DCG	ENSGACG00000013400	\N	ENSONIG00000001259	Uncharacterized protein	sb:cb81	mRNA decay activator protein ZFP36L1	1	1	no	0	0	0	0	0	0	0	0	0	0
EOG090C07M1	ENSGACG00000004679	heterogeneous nuclear ribonucleoprotein Ub	ENSONIG00000001260	heterogeneous nuclear ribonucleoprotein Ub	hnrnpub	heterogeneous nuclear ribonucleoprotein Ub	1	1	no	0	0	0	0	0	0	0	0	0	0
EOG090C04I0	ENSGACG00000010072	Sp3b transcription factor	ENSONIG00000001262	Sp3b transcription factor	sp3b	Sp3b transcription factor	1	1	no	0	0	0	0	0	0	0	0	0	0
EOG090C0B3U	ENSGACG00000013384	ribosomal protein S3	ENSONIG00000001263	Similarity:Belongs to the ribosomal protein S3P family.	rps3	ribosomal protein S3	1	1	yes	0	1	0	0	0	0	0	0	0	0
EOG090C08L9	ENSGACG00000000973;ENSGACG00000019606	malate dehydrogenase 1Ab, NAD (soluble) ;malate dehydrogenase 1Aa, NAD (soluble)	ENSONIG00000001264;ENSONIG00000016001	Malate dehydrogenase;Malate dehydrogenase	MDH1 (1 of many);mdh1aa	malate dehydrogenase 1 ;malate dehydrogenase, cytoplasmic	2	2	no	0	0	0	0	0	0	0	0	0	0
EOG090C07MO	ENSGACG00000010083	Obg-like ATPase 1	ENSONIG00000001265;ENSONIG00000008658	Obg-like ATPase 1;Obg-like ATPase 1	ola1;OLA1	obg-like ATPase 1 ;obg-like ATPase 1	1	2	no	0	0	0	0	0	0	0	0	0	0
EOG090C00P2	ENSGACG00000016624	Rap guanine nucleotide exchange factor (GEF) 2	ENSONIG00000001266	Similarity:Contains 1 PDZ (DHR) domain.	rapgef2	Rap guanine nucleotide exchange factor (GEF) 2	1	1	yes	0	0	0	0	0	0	0	0	1	0
EOG090C0CUZ	ENSGACG00000014221	MLX, MAX dimerization protein	ENSONIG00000001267	Similarity:Contains 1 basic helix-loop-helix (bHLH) domain.	mlx	MLX, MAX dimerization protein	1	1	no	0	0	0	0	0	0	0	0	0	0
EOG090C0EKR	ENSGACG00000013383	potassium channel tetramerization domain containing 14	ENSONIG00000001268	potassium channel tetramerization domain containing 14	kctd14	potassium channel tetramerization domain containing 14	1	1	no	0	0	0	0	0	0	0	0	0	0
EOG090C00F5	ENSGACG00000004668	kinesin family member 26Bb	ENSONIG00000001269	Kinesin-like protein			1	1	yes	0	0	0	0	0	1	0	0	0	0
EOG090C01ZP	ENSGACG00000013367	integrator complex subunit 4	ENSONIG00000001272	integrator complex subunit 4	ints4	integrator complex subunit 4	1	1	no	0	0	0	0	0	0	0	0	0	0
EOG090C022C	ENSGACG00000004388;ENSGACG00000014208	formin-like 1 ;formin-like 1a	ENSONIG00000001273;ENSONIG00000018104	Similarity:Contains FH2 (formin homology 2) domain.;Similarity:Contains FH2 (formin homology 2) domain.	fmnl1a;	formin-like 1a ;	2	2	no	0	0	0	0	0	0	0	0	0	0
EOG090C0FW2	ENSGACG00000005986;ENSGACG00000010109	transformer 2 beta homolog (Drosophila) ;transformer 2 beta homolog (Drosophila)	ENSONIG00000001274;ENSONIG00000009025	Transmembrane:Helical;transformer 2 beta homolog (Drosophila)	;tra2b	transformer-2 protein homolog alpha ;transformer 2 beta homolog	2	2	no	0	0	0	0	0	0	0	0	0	0
EOG090C0AAK	ENSGACG00000004657;ENSGACG00000004658	consortin, connexin sorting protein b ;consortin, connexin sorting protein b	ENSONIG00000001275	Transmembrane:Helical	cnstb	consortin, connexin sorting protein b	2	1	no	0	0	0	0	0	0	0	0	0	0
EOG090C0DCZ	ENSGACG00000004546	synaptosomal-associated protein, 25a	ENSONIG00000001276	Synaptosomal-associated protein	snap25a	synaptosome associated protein 25	1	1	no	0	0	0	0	0	0	0	0	0	0
EOG090C01M8	ENSGACG00000004377;ENSGACG00000014202	SRC kinase signaling inhibitor 1 ;SRC kinase signaling inhibitor 1	ENSONIG00000001279;ENSONIG00000018109	SRC kinase signaling inhibitor 1 ;SRC kinase signaling inhibitor 1	si:ch211-278a6.1;	SRC kinase signaling inhibitor 1 ;	2	2	yes	0	0	0	0	0	0	0	0	1	0
EOG090C051Y	ENSGACG00000004520	ankyrin repeat and EF-hand domain containing 1a	ENSONIG00000001282	Similarity:Contains 10 ANK repeats.	ankef1a	ankyrin repeat and EF-hand domain containing 1	1	1	yes	0	0	0	0	0	1	0	0	0	0
EOG090C0CQR	ENSGACG00000013152	eukaryotic translation initiation factor 3, subunit K	ENSONIG00000001283	eIF-3 p25	eif3k	eukaryotic translation initiation factor 3 subunit K	1	1	no	0	0	0	0	0	0	0	0	0	0
EOG090C03BP	ENSGACG00000013147	zgc:85932	ENSONIG00000001284	zgc:85932	zgc:85932	calpain-9	1	1	no	0	0	0	0	0	0	0	0	0	0
EOG090C02BG	ENSGACG00000010122	ATG9 autophagy related 9 homolog A (S. cerevisiae)	ENSONIG00000001285	Transmembrane:Helical	atg9a	autophagy-related protein 9A	1	1	no	0	0	0	0	0	0	0	0	0	0
EOG090C01ZV	ENSGACG00000016634	follistatin-like 5	ENSONIG00000001287	follistatin-like 5	fstl5	follistatin-like 5	1	1	no	0	0	0	0	0	0	0	0	0	0
EOG090C08T8	ENSGACG00000014190	wingless-type MMTV integration site family, member 9B	ENSONIG00000001288	Protein Wnt	wnt9b	Wnt family member 9B	1	1	no	0	0	0	0	0	0	0	0	0	0
EOG090C00WK	ENSGACG00000006258;ENSGACG00000011956;ENSGACG00000017595;ENSGACG00000017644	\N;\N;\N;\N	ENSONIG00000001289;ENSONIG00000008317;ENSONIG00000015004;ENSONIG00000015048	Similarity:Contains 1 F5/8 type C domain.;Similarity:Contains 1 F5/8 type C domain.;Similarity:Contains 1 F5/8 type C domain.;Similarity:Contains 1 F5/8 type C domain.	;;;	contactin-associated protein-like 4 ;contactin-associated protein-like 4 ;;contactin-associated protein-like 4	4	4	yes	0	0	0	0	0	0	0	1	0	0
EOG090C0561	ENSGACG00000004508	elastin microfibril interfacer 1a	ENSONIG00000001290	elastin microfibril interfacer 1a	emilin1a	elastin microfibril interfacer 1a	1	1	no	0	0	0	0	0	0	0	0	0	0
EOG090C0DPG	ENSGACG00000014177	golgi SNAP receptor complex member 2	ENSONIG00000001291	Transmembrane:Helical	gosr2	golgi SNAP receptor complex member 2	1	1	no	0	0	0	0	0	0	0	0	0	0
EOG090C023M	ENSGACG00000014175	G patch domain containing 8	ENSONIG00000001292	Similarity:Contains G-patch domain.	gpatch8	G patch domain containing 8	1	1	no	0	0	0	0	0	0	0	0	0	0
EOG090C0EHE	ENSGACG00000004482	stathmin-like 4	ENSONIG00000001293	Stathmin	stmn4	stathmin-like 4	1	1	no	0	0	0	0	0	0	0	0	0	0
EOG090C02OW	ENSGACG00000004469	minichromosome maintenance complex component 3	ENSONIG00000001295	DNA helicase	mcm3	minichromosome maintenance complex component 3	1	1	no	0	0	0	0	0	0	0	0	0	0
EOG090C0D11	ENSGACG00000016641	quinoid dihydropteridine reductase a	ENSONIG00000001296	quinoid dihydropteridine reductase a	qdpra	quinoid dihydropteridine reductase	1	1	no	0	0	0	0	0	0	0	0	0	0
EOG090C02JX	ENSGACG00000014169	mitogen-activated protein kinase kinase kinase 14	ENSONIG00000001297	mitogen-activated protein kinase kinase kinase 14			1	1	no	0	0	0	0	0	0	0	0	0	0
EOG090C0DZW	ENSGACG00000014161	bcl2-associated X protein, a	ENSONIG00000001299	bcl2-associated X protein, a			1	1	no	0	0	0	0	0	0	0	0	0	0
EOG090C0EXP	ENSGACG00000014154	ribosomal protein S11	ENSONIG00000001300	Similarity:Belongs to the ribosomal protein S17P family.	si:dkey-159f12.2	ribosomal protein S11	1	1	yes	0	1	0	0	0	0	0	0	0	0
EOG090C087D	ENSGACG00000016642	LIM domain binding 2a	ENSONIG00000001301	LIM domain binding 2a	ldb2a	LIM domain binding 2a	1	1	no	0	0	0	0	0	0	0	0	0	0
EOG090C0602	ENSGACG00000016645	transmembrane anterior posterior transformation 1a	ENSONIG00000001302	Transmembrane:Helical	tapt1a	transmembrane anterior posterior transformation 1a	1	1	no	0	0	0	0	0	0	0	0	0	0
EOG090C09JH	ENSGACG00000004464	zinc finger protein 395b	ENSONIG00000001303	zinc finger protein 395b	znf395b	zinc finger protein 395b	1	1	no	0	0	0	0	0	0	0	0	0	0
EOG090C08L2	ENSGACG00000014145	LFNG O-fucosylpeptide 3-beta-N-acetylglucosaminyltransferase	ENSONIG00000001304	O-fucosylpeptide 3-beta-N-acetylglucosaminyltransferase	lfng	LFNG O-fucosylpeptide 3-beta-N-acetylglucosaminyltransferase	1	1	no	0	0	0	0	0	0	0	0	0	0
EOG090C0CNO	ENSGACG00000004461	prepronociceptin b	ENSONIG00000001305	prepronociceptin b	pnocb	prepronociceptin b	1	1	no	0	0	0	0	0	0	0	0	0	0
EOG090C0819	ENSGACG00000004453	si:ch211-63o20.7	ENSONIG00000001306	Similarity:Belongs to the protein kinase superfamily.	si:ch211-63o20.7	si:ch211-63o20.7	1	1	no	0	0	0	0	0	0	0	0	0	0
EOG090C04NZ	ENSGACG00000004427	elongator acetyltransferase complex subunit 3	ENSONIG00000001307	elongator acetyltransferase complex subunit 3	elp3	elongator acetyltransferase complex subunit 3	1	1	no	0	0	0	0	0	0	0	0	0	0
EOG090C021P	ENSGACG00000016649	prominin 1a	ENSONIG00000001308	Transmembrane:Helical	prom1a	prominin 1a	1	1	no	0	0	0	0	0	0	0	0	0	0
EOG090C0EXG	ENSGACG00000011953	family with sequence similarity 96, member B	ENSONIG00000001310	family with sequence similarity 96, member B	ciao2b	cytosolic iron-sulfur assembly component 2B	1	1	no	0	0	0	0	0	0	0	0	0	0
EOG090C00EU	ENSGACG00000004401	kinesin family member 13Bb	ENSONIG00000001311	Kinesin-like protein	kif13bb	kinesin-like protein KIF13B	1	1	no	0	0	0	0	0	0	0	0	0	0
EOG090C0G89	ENSGACG00000005931;ENSGACG00000010136	small ubiquitin-like modifier 3 ;small ubiquitin-like modifier 3a	ENSONIG00000001312;ENSONIG00000008998	Small ubiquitin-related modifier;Small ubiquitin-related modifier	;sumo3b	small ubiquitin-related modifier 3 ;small ubiquitin-related modifier 3	2	2	no	0	0	0	0	0	0	0	0	0	0
EOG090C0GJ6	ENSGACG00000011946	WAS/WASL interacting protein family, member 1b	ENSONIG00000001313	WAS/WASL interacting protein family, member 1b	wipf1a	WAS/WASL interacting protein family member 1	1	1	no	0	0	0	0	0	0	0	0	0	0
EOG090C06T9	ENSGACG00000014134	sorting nexin 8a	ENSONIG00000001314	sorting nexin 8a	snx8a	sorting nexin 8	1	1	no	0	0	0	0	0	0	0	0	0	0
EOG090C06EB	ENSGACG00000000289;ENSGACG00000010149	thrombospondin-type laminin G domain and EAR repeats b ;thrombospondin-type laminin G domain and EAR repeats a	ENSONIG00000001315;ENSONIG00000004261	thrombospondin-type laminin G domain and EAR repeats a ;thrombospondin-type laminin G domain and EAR repeats b	tspeara;	thrombospondin-type laminin G domain and EAR repeats a ;	2	2	no	0	0	0	0	0	0	0	0	0	0
EOG090C0216	ENSGACG00000013140	actinin, alpha 4	ENSONIG00000001316	actinin, alpha 4	ACTN4	alpha-actinin-4	1	1	no	0	0	0	0	0	0	0	0	0	0
EOG090C023R	ENSGACG00000011939	G protein-coupled receptor 155b	ENSONIG00000001317	Transmembrane:Helical	gpr155b	integral membrane protein GPR155	1	1	no	0	0	0	0	0	0	0	0	0	0
EOG090C010K	ENSGACG00000010156	ubiquitin specific peptidase 40	ENSONIG00000001318	Similarity:Contains USP domain.	usp40	ubiquitin specific peptidase 40	1	1	no	0	0	0	0	0	0	0	0	0	0
EOG090C0FGQ	ENSGACG00000014129	nudix (nucleoside diphosphate linked moiety X)-type motif 1	ENSONIG00000001319	Similarity:Belongs to the Nudix hydrolase family.	nudt1	nudix hydrolase 1	1	1	no	0	0	0	0	0	0	0	0	0	0
EOG090C0C57	ENSGACG00000006043;ENSGACG00000011933	transmembrane protein 41aa ;transmembrane protein 41ab	ENSONIG00000001320;ENSONIG00000009032	Transmembrane:Helical;Transmembrane:Helical	tmem41ab;tmem41aa	transmembrane protein 41A-B ;transmembrane protein 41aa	2	2	no	0	0	0	0	0	0	0	0	0	0
EOG090C0C7C	ENSGACG00000014126	FtsJ RNA methyltransferase homolog 2 (E. coli)	ENSONIG00000001321	Active Site:Proton acceptor	mrm2	mitochondrial rRNA methyltransferase 2	1	1	no	0	0	0	0	0	0	0	0	0	0
EOG090C0FRD	ENSGACG00000014123	proteasome (prosome, macropain) assembly chaperone 3	ENSONIG00000001322	proteasome (prosome, macropain) assembly chaperone 3	psmg3	proteasome (prosome, macropain) assembly chaperone 3	1	1	no	0	0	0	0	0	0	0	0	0	0
EOG090C08AO	ENSGACG00000014105	transmembrane protein 184a	ENSONIG00000001323	Transmembrane:Helical	tmem184a	transmembrane protein 184a	1	1	no	0	0	0	0	0	0	0	0	0	0
EOG090C03IN	ENSGACG00000011926	cadherin 5	ENSONIG00000001324	Function:Cadherins are calcium-dependent cell adhesion proteins.	cdh5	cadherin-5	1	1	no	0	0	0	0	0	0	0	0	0	0
EOG090C0FD0	ENSGACG00000010166	fatty acid binding protein 7, brain, a	ENSONIG00000001326	Similarity:Belongs to the calycin superfamily. Fatty-acid binding protein (FABP) family.	fabp7a	fatty acid-binding protein, brain	1	1	yes	0	1	0	0	0	0	0	0	0	0
EOG090C0AN5	ENSGACG00000016658	annexin A5a	ENSONIG00000001327	Annexin	anxa5a	annexin A5a	1	1	no	0	0	0	0	0	0	0	0	0	0
EOG090C07BN	ENSGACG00000004391;ENSGACG00000014814	homeobox containing 1 b ;homeobox containing 1a	ENSONIG00000001328;ENSONIG00000003040	homeobox containing 1 b ;homeobox containing 1a	HMBOX1;	homeobox containing 1 ;	2	2	no	0	0	0	0	0	0	0	0	0	0
EOG090C0DHF	ENSGACG00000014101	v-maf avian musculoaponeurotic fibrosarcoma oncogene homolog K	ENSONIG00000001329	v-maf avian musculoaponeurotic fibrosarcoma oncogene homolog K	mafk	MAF bZIP transcription factor K	1	1	no	0	0	0	0	0	0	0	0	0	0
EOG090C00JN	ENSGACG00000004386	dispatched homolog 1 (Drosophila)	ENSONIG00000001330	Transmembrane:Helical	disp1	dispatched RND transporter family member 1	1	1	no	0	0	0	0	0	0	0	0	0	0
EOG090C008Y	ENSGACG00000014088	integrator complex subunit 1	ENSONIG00000001331	integrator complex subunit 1	ints1	integrator complex subunit 1	1	1	no	0	0	0	0	0	0	0	0	0	0
EOG090C0C60	ENSGACG00000011909	metaxin 2	ENSONIG00000001332	metaxin 2	mtx2	metaxin 2	1	1	no	0	0	0	0	0	0	0	0	0	0
EOG090C034H	ENSGACG00000004381;ENSGACG00000007147;ENSGACG00000007154	toll-like receptor 5 ;toll-like receptor 5 ;toll-like receptor 5	ENSONIG00000001333;ENSONIG00000005558	Similarity:Contains TIR domain.;toll-like receptor 5	TLR5;	toll like receptor 5 ;	3	2	no	0	0	0	0	0	0	0	0	0	0
EOG090C054G	ENSGACG00000006450;ENSGACG00000010180	FYN proto-oncogene, Src family tyrosine kinase b ;FYN proto-oncogene, Src family tyrosine kinase a	ENSONIG00000001335;ENSONIG00000011372	Tyrosine-protein kinase;Tyrosine-protein kinase	fynb;FYN (1 of many)	FYN proto-oncogene, Src family tyrosine kinase b ;FYN proto-oncogene, Src family tyrosine kinase	2	2	no	0	0	0	0	0	0	0	0	0	0
EOG090C082E	ENSGACG00000004335	BRO1 domain and CAAX motif containing	ENSONIG00000001336	BRO1 domain and CAAX motif containing	brox	BRO1 domain and CAAX motif containing	1	1	no	0	0	0	0	0	0	0	0	0	0
EOG090C07HR	ENSGACG00000016665	cyclin A2	ENSONIG00000001338	cyclin A2	ccna2	cyclin A2	1	1	no	0	0	0	0	0	0	0	0	0	0
EOG090C0GPC	ENSGACG00000006334;ENSGACG00000010228	myristoylated alanine-rich protein kinase C substrate a ;myristoylated alanine-rich protein kinase C substrate b	ENSONIG00000001339;ENSONIG00000011355	myristoylated alanine-rich protein kinase C substrate b ;myristoylated alanine-rich protein kinase C substrate a	marcksb;MARCKS	myristoylated alanine-rich C-kinase substrate ;myristoylated alanine rich protein kinase C substrate	2	2	no	0	0	0	0	0	0	0	0	0	0
EOG090C09WT	ENSGACG00000010232	collagen, type X, alpha 1a	ENSONIG00000001340	Similarity:Contains C1q domain.	col10a1a	collagen alpha-1(X) chain	1	1	no	0	0	0	0	0	0	0	0	0	0
EOG090C0D0Y	ENSGACG00000011907	\N	ENSONIG00000001341	Similarity:Belongs to the Antp homeobox family.			1	1	no	0	0	0	0	0	0	0	0	0	0
EOG090C02H2	ENSGACG00000010236	si:ch211-266g18.9	ENSONIG00000001342	si:ch211-266g18.9	si:ch211-266g18.9	si:ch211-266g18.9	1	1	no	0	0	0	0	0	0	0	0	0	0
EOG090C0BQU	ENSGACG00000011902	\N	ENSONIG00000001343	Similarity:Contains homeobox DNA-binding domain.			1	1	no	0	0	0	0	0	0	0	0	0	0
EOG090C04TJ	ENSGACG00000004319	meprin A, alpha (PABA peptide hydrolase), tandem duplicate 1	ENSONIG00000001344	Metalloendopeptidase	mep1a.1	meprin A, alpha (PABA peptide hydrolase), tandem duplicate 1	1	1	no	0	0	0	0	0	0	0	0	0	0
EOG090C02CU	ENSGACG00000012302	solute carrier family 8 (sodium/calcium exchanger), member 2b	ENSONIG00000001345	Transmembrane:Helical			1	1	no	0	0	0	0	0	0	0	0	0	0
EOG090C0AJT	ENSGACG00000004584;ENSGACG00000011901	limb and neural patterns a ;limb and neural patterns b	ENSONIG00000001346;ENSONIG00000008621	Transmembrane:Helical;Transmembrane:Helical	;lnpa	;lunapark, ER junction formation factor	2	2	no	0	0	0	0	0	0	0	0	0	0
EOG090C0A6I	ENSGACG00000010242	four and a half LIM domains 5	ENSONIG00000001347	Similarity:Contains 4 LIM zinc-binding domains.	fhl5	four and a half LIM domains protein 2	1	1	no	0	0	0	0	0	0	0	0	0	0
EOG090C0C0N	ENSGACG00000014085	si:dkey-43p13.5	ENSONIG00000001348	Similarity:Contains homeobox DNA-binding domain.		visual system homeobox 2	1	1	no	0	0	0	0	0	0	0	0	0	0
EOG090C030D	ENSGACG00000014082	MICAL-like 2	ENSONIG00000001349	Similarity:Contains 1 LIM zinc-binding domain.	micall2a	mical-like 2a	1	1	no	0	0	0	0	0	0	0	0	0	0
EOG090C045B	ENSGACG00000004292	meprin A, alpha (PABA peptide hydrolase), tandem duplicate 2	ENSONIG00000001350	Similarity:Contains 1 MATH domain.	mep1a.2	meprin A, alpha (PABA peptide hydrolase), tandem duplicate 2	1	1	no	0	0	0	0	0	0	0	0	0	0
EOG090C07U6	ENSGACG00000010260	mannosidase, endo-alpha	ENSONIG00000001351	mannosidase, endo-alpha	manea	glycoprotein endo-alpha-1,2-mannosidase	1	1	no	0	0	0	0	0	0	0	0	0	0
EOG090C06DF	ENSGACG00000014079	Unc4.1 homeobox (C. elegans)	ENSONIG00000001352	UNC homeobox	uncx	UNC homeobox	1	1	no	0	0	0	0	0	0	0	0	0	0
EOG090C07LM	ENSGACG00000004638;ENSGACG00000011894	cholinergic receptor, nicotinic, alpha 1 (muscle) ;cholinergic receptor, nicotinic, alpha 1 (muscle)	ENSONIG00000001353;ENSONIG00000008636	Similarity:Belongs to the ligand-gated ion channel (TC 1.A.9) family.;Similarity:Belongs to the ligand-gated ion channel (TC 1.A.9) family.	;CHRNA1	;cholinergic receptor nicotinic alpha 1 subunit	2	2	no	0	0	0	0	0	0	0	0	0	0
EOG090C03S3	ENSGACG00000016673	Bardet-Biedl syndrome 7	ENSONIG00000001354	Bardet-Biedl syndrome 7	bbs7	Bardet-Biedl syndrome 7	1	1	no	0	0	0	0	0	0	0	0	0	0
EOG090C0CDM	ENSGACG00000014057	zinc finger, AN1-type domain 2A	ENSONIG00000001355	zinc finger, AN1-type domain 2A	zfand2a	zinc finger AN1-type containing 2A	1	1	no	0	0	0	0	0	0	0	0	0	0
EOG090C096D	ENSGACG00000008134;ENSGACG00000010272	protein phosphatase 1, catalytic subunit, beta isozyme ;protein phosphatase 1, catalytic subunit, beta isozyme	ENSONIG00000001356;ENSONIG00000005846	Serine/threonine-protein phosphatase;Serine/threonine-protein phosphatase	ppp1cb;PPP1CB	protein phosphatase 1, catalytic subunit, beta isozyme ;serine/threonine-protein phosphatase PP1-beta catalytic subunit	2	2	yes	0	1	0	0	0	0	0	0	0	0
EOG090C0DRO	ENSGACG00000008192;ENSGACG00000010339	yippee-like 5 ;yippee-like 5	ENSONIG00000001358;ENSONIG00000005851	Protein yippee-like;Protein yippee-like	ypel5;	yippee like 5 ;protein yippee-like 5	2	2	no	0	0	0	0	0	0	0	0	0	0
EOG090C08U6	ENSGACG00000014055	galanin receptor 2b	ENSONIG00000001359	Similarity:Belongs to the G-protein coupled receptor 1 family.		galanin receptor type 2	1	1	no	0	0	0	0	0	0	0	0	0	0
EOG090C0FQH	ENSGACG00000012311	serine/arginine-rich splicing factor 7a	ENSONIG00000001360	serine/arginine-rich splicing factor 7a			1	1	yes	0	0	0	0	0	0	0	0	1	0
EOG090C07PX	ENSGACG00000010345	lysocardiolipin acyltransferase 1	ENSONIG00000001361	Transmembrane:Helical	lclat1	lysocardiolipin acyltransferase 1	1	1	no	0	0	0	0	0	0	0	0	0	0
EOG090C02FP	ENSGACG00000014047	axin 1	ENSONIG00000001362	Similarity:Contains 1 RGS domain.	axin1	axin-1	1	1	no	0	0	0	0	0	0	0	0	0	0
EOG090C0BX6	ENSGACG00000016676	transmembrane protein 33	ENSONIG00000001363	Transmembrane:Helical	tmem33	transmembrane protein 33	1	1	no	0	0	0	0	0	0	0	0	0	0
EOG090C02QH	ENSGACG00000011843	cadherin 11, type 2, OB-cadherin (osteoblast)	ENSONIG00000001364	Function:Cadherins are calcium-dependent cell adhesion proteins.	cdh11	cadherin 11	1	1	yes	0	0	0	0	0	0	0	0	1	0
EOG090C0G52	ENSGACG00000010360	limb bud and heart development	ENSONIG00000001365	limb bud and heart development	lbh	limb bud and heart development	1	1	no	0	0	0	0	0	0	0	0	0	0
EOG090C085V	ENSGACG00000010368	bone morphogenetic protein 4	ENSONIG00000001366	Similarity:Belongs to the TGF-beta family.	bmp4	bone morphogenetic protein 4	1	1	no	0	0	0	0	0	0	0	0	0	0
EOG090C02E8	ENSGACG00000010372	DDHD domain containing 1a	ENSONIG00000001367	DDHD domain containing 1a	ddhd1a	phospholipase DDHD1	1	1	no	0	0	0	0	0	0	0	0	0	0
EOG090C0FF4	ENSGACG00000014045	phospholipase A2, group X	ENSONIG00000001368	Phospholipase A(2)	zgc:92162	phospholipase A2	1	1	no	0	0	0	0	0	0	0	0	0	0
EOG090C0BS2	ENSGACG00000016683	paired-like homeobox 2bb	ENSONIG00000001369	paired-like homeobox 2bb	phox2bb	paired like homeobox 2B	1	1	no	0	0	0	0	0	0	0	0	0	0
EOG090C0E5O	ENSGACG00000013226	V-set and transmembrane domain containing 5	ENSONIG00000001370	Transmembrane:Helical		V-set and transmembrane domain containing 5	1	1	no	0	0	0	0	0	0	0	0	0	0
EOG090C017X	ENSGACG00000016686	LIM and calponin homology domains 1b	ENSONIG00000001371	Similarity:Contains 1 LIM zinc-binding domain.	limch1b	LIM and calponin homology domains 1b	1	1	no	0	0	0	0	0	0	0	0	0	0
EOG090C03UJ	ENSGACG00000013203	mediator complex subunit 17	ENSONIG00000001372	mediator complex subunit 17	med17	mediator complex subunit 17	1	1	no	0	0	0	0	0	0	0	0	0	0
EOG090C03FY	ENSGACG00000014038	zinc finger CCCH-type containing 7A	ENSONIG00000001373	zinc finger CCCH-type containing 7A	zc3h7a	zinc finger CCCH-type containing 7A	1	1	no	0	0	0	0	0	0	0	0	0	0
EOG090C03QX	ENSGACG00000010383	fermitin family member 2	ENSONIG00000001374	Similarity:Contains 1 PH domain.	fermt2	fermitin family member 2	1	1	no	0	0	0	0	0	0	0	0	0	0
EOG090C02JY	ENSGACG00000003088	gon-4-like (C. elegans)	ENSONIG00000001376	gon-4-like (C. elegans)	gon4l	gon-4-like (C. elegans)	1	1	no	0	0	0	0	0	0	0	0	0	0
EOG090C0C0U	ENSGACG00000016693	ladybird homeobox 2	ENSONIG00000001377	ladybird homeobox 2	lbx2	transcription factor LBX1	1	1	no	0	0	0	0	0	0	0	0	0	0
EOG090C0B6W	ENSGACG00000016695	polycomb group ring finger 1	ENSONIG00000001378	polycomb group ring finger 1	pcgf1	polycomb group ring finger 1	1	1	no	0	0	0	0	0	0	0	0	0	0
EOG090C03U0	ENSGACG00000011835	minichromosome maintenance complex component 8	ENSONIG00000001379	DNA helicase	mcm8	minichromosome maintenance 8 homologous recombination repair factor	1	1	no	0	0	0	0	0	0	0	0	0	0
EOG090C0G5N	ENSGACG00000014037	RecQ mediated genome instability 2	ENSONIG00000001380	RecQ mediated genome instability 2	rmi2	RecQ mediated genome instability 2	1	1	no	0	0	0	0	0	0	0	0	0	0
EOG090C0APK	ENSGACG00000014033	ubiquitin family domain containing 1	ENSONIG00000001381	ubiquitin family domain containing 1	ubfd1	ubiquitin family domain containing 1	1	1	no	0	0	0	0	0	0	0	0	0	0
EOG090C0BZT	ENSGACG00000003084	transmembrane protein 79b	ENSONIG00000001383	Transmembrane:Helical	tmem79b	transmembrane protein 79b	1	1	no	0	0	0	0	0	0	0	0	0	0
EOG090C0365	ENSGACG00000001291;ENSGACG00000001295	Rho guanine nucleotide exchange factor (GEF) 1a ;\N	ENSONIG00000001384;ENSONIG00000010340	Similarity:Contains DH (DBL-homology) domain.;Similarity:Contains DH (DBL-homology) domain.	ARHGEF2;arhgef1a	rho guanine nucleotide exchange factor 2 ;rho guanine nucleotide exchange factor 2	2	2	yes	0	0	0	0	0	0	0	0	1	0
EOG090C0DMU	ENSGACG00000016697	fibroblast growth factor 24	ENSONIG00000001385	Fibroblast growth factor	fgf24	fibroblast growth factor 18	1	1	no	0	0	0	0	0	0	0	0	0	0
EOG090C085Y	ENSGACG00000014021	lysine (K)-specific demethylase 8	ENSONIG00000001386	Similarity:Contains JmjC domain.	kdm8	lysine (K)-specific demethylase 8	1	1	no	0	0	0	0	0	0	0	0	0	0
EOG090C0A77	ENSGACG00000005651;ENSGACG00000010416	connexin 35b ;gap junction protein, delta 2, 36kDa	ENSONIG00000001387	Gap junction protein	gjd2b	gap junction protein delta 2	2	1	no	0	0	0	0	0	0	0	0	0	0
EOG090C08P0	ENSGACG00000014020	heparan sulfate (glucosamine) 3-O-sulfotransferase 2	ENSONIG00000001390	Sulfotransferase	hs3st2	heparan sulfate glucosamine 3-O-sulfotransferase 2	1	1	yes	0	1	0	0	0	0	0	0	0	0
EOG090C01FS	ENSGACG00000011822	phospholipase C, beta 1 (phosphoinositide-specific)	ENSONIG00000001391	Phosphoinositide phospholipase C			1	1	no	0	0	0	0	0	0	0	0	0	0
EOG090C018G	ENSGACG00000014010	ubiquitin specific peptidase 31	ENSONIG00000001392	Similarity:Contains USP domain.	usp31	ubiquitin specific peptidase 31	1	1	no	0	0	0	0	0	0	0	0	0	0
EOG090C08A1	ENSGACG00000000773;ENSGACG00000018075	zinc finger, CCHC domain containing 3 ;zinc finger, CCHC domain containing 3	ENSONIG00000001393	zinc finger, CCHC domain containing 3			2	1	no	0	0	0	0	0	0	0	0	0	0
EOG090C04HA	ENSGACG00000013360	family with sequence similarity 222, member Bb	ENSONIG00000001394	family with sequence similarity 222, member Bb	fam222bb	family with sequence similarity 222 member Bb	1	1	no	0	0	0	0	0	0	0	0	0	0
EOG090C00LS	ENSGACG00000010437	aquarius intron-binding spliceosomal factor	ENSONIG00000001395	aquarius intron-binding spliceosomal factor	aqr	aquarius intron-binding spliceosomal factor	1	1	no	0	0	0	0	0	0	0	0	0	0
EOG090C08R5	ENSGACG00000013325;ENSGACG00000020250	flotillin 2b ;flotillin 2a	ENSONIG00000001396;ENSONIG00000012790	flotillin 2b ;flotillin 2a	FLOT2 (1 of many);flot2a	flotillin-2 ;flotillin 2a	2	2	no	0	0	0	0	0	0	0	0	0	0
EOG090C0BID	ENSGACG00000016706	nucleophosmin 1b (nucleolar phosphoprotein B23, numatrin)	ENSONIG00000001397	nucleophosmin 1b (nucleolar phosphoprotein B23, numatrin)	npm1b	nucleophosmin 1b	1	1	no	0	0	0	0	0	0	0	0	0	0
EOG090C0E5R	ENSGACG00000003080	tropomyosin 4b	ENSONIG00000001398	Similarity:Belongs to the tropomyosin family.			1	1	no	0	0	0	0	0	0	0	0	0	0
EOG090C0171	ENSGACG00000014005	BAI1-associated protein 3	ENSONIG00000001399	Similarity:Contains 2 C2 domains.	baiap3	BAI1 associated protein 3	1	1	no	0	0	0	0	0	0	0	0	0	0
EOG090C03KD	ENSGACG00000010500	diphthamine biosynthesis 6	ENSONIG00000001400	diphthamine biosynthesis 6	dph6	diphthamine biosynthesis 6	1	1	no	0	0	0	0	0	0	0	0	0	0
EOG090C008P	ENSGACG00000013269;ENSGACG00000020788	myosin VIIAa ;myosin VIIAb	ENSONIG00000001401;ENSONIG00000009556	Similarity:Contains myosin motor domain.;Similarity:Contains myosin motor domain.	myo7aa;myo7ab	myosin VIIAa ;myosin VIIAb	2	2	yes	0	0	0	0	0	0	0	0	1	0
EOG090C0CMZ	ENSGACG00000016709	T-cell leukemia, homeobox 2	ENSONIG00000001402	Similarity:Contains homeobox DNA-binding domain.	tlx2	T cell leukemia homeobox 2	1	1	no	0	0	0	0	0	0	0	0	0	0
EOG090C05T3	ENSGACG00000010527	Meis homeobox 2a	ENSONIG00000001403	Meis homeobox 2a	MEIS2	Meis homeobox 2	1	1	no	0	0	0	0	0	0	0	0	0	0
EOG090C0DAG	ENSGACG00000003071	phosphomevalonate kinase	ENSONIG00000001404	phosphomevalonate kinase	pmvk	phosphomevalonate kinase	1	1	no	0	0	0	0	0	0	0	0	0	0
EOG090C05BE	ENSGACG00000016712	adenosine deaminase domain containing 1 (testis-specific)	ENSONIG00000001405	adenosine deaminase domain containing 1 (testis-specific)	adad1	adenosine deaminase domain containing 1 (testis-specific)	1	1	no	0	0	0	0	0	0	0	0	0	0
EOG090C0ENB	ENSGACG00000018281	centrin, EF-hand protein, 2	ENSONIG00000001409;ENSONIG00000017843	centrin 4 ;centrin, EF-hand protein, 2	cetn4;cetn2	centrin 4 ;caltractin	1	2	no	0	0	0	0	0	0	0	0	0	0
EOG090C00QT	ENSGACG00000003101	IQ motif containing GTPase activating protein 3	ENSONIG00000001410	IQ motif containing GTPase activating protein 3	iqgap3	IQ motif containing GTPase activating protein 3	1	1	no	0	0	0	0	0	0	0	0	0	0
EOG090C041Y	ENSGACG00000013995	unkempt family zinc finger-like	ENSONIG00000001411	Similarity:Contains RING-type zinc finger.	unkl	unk like zinc finger	1	1	no	0	0	0	0	0	0	0	0	0	0
EOG090C0815	ENSGACG00000010532	sprouty-related, EVH1 domain containing 1	ENSONIG00000001412	sprouty-related, EVH1 domain containing 1	spred1	sprouty related EVH1 domain containing 1	1	1	no	0	0	0	0	0	0	0	0	0	0
EOG090C0ENK	ENSGACG00000016721	fibroblast growth factor 2	ENSONIG00000001414	Fibroblast growth factor	fgf2	fibroblast growth factor 2	1	1	no	0	0	0	0	0	0	0	0	0	0
EOG090C0ABY	ENSGACG00000010534	family with sequence similarity 98, member B	ENSONIG00000001415	family with sequence similarity 98, member B	fam98b	family with sequence similarity 98 member B	1	1	no	0	0	0	0	0	0	0	0	0	0
EOG090C09WW	ENSGACG00000016725	nudix (nucleoside diphosphate linked moiety X)-type motif 6	ENSONIG00000001416	Similarity:Belongs to the Nudix hydrolase family.	nudt6	nudix hydrolase 6	1	1	no	0	0	0	0	0	0	0	0	0	0
EOG090C08JM	ENSGACG00000013991	shisa family member 9b	ENSONIG00000001417	Transmembrane:Helical	shisa9b	protein shisa-9B	1	1	no	0	0	0	0	0	0	0	0	0	0
EOG090C012H	ENSGACG00000010542	protein tyrosine phosphatase, non-receptor type 21	ENSONIG00000001418	Protein-tyrosine-phosphatase	ptpn21	protein tyrosine phosphatase, non-receptor type 21	1	1	no	0	0	0	0	0	0	0	0	0	0
EOG090C02Y9	ENSGACG00000013988	MKL/myocardin-like 2b	ENSONIG00000001419	MKL/myocardin-like 2b	mrtfbb	myocardin related transcription factor Bb	1	1	yes	0	0	0	0	0	0	0	0	0	1
EOG090C0408	ENSGACG00000011733	CDC5 cell division cycle 5-like (S. pombe)	ENSONIG00000001420	CDC5 cell division cycle 5-like (S. pombe)	cdc5l	cell division cycle 5 like	1	1	no	0	0	0	0	0	0	0	0	0	0
EOG090C027G	ENSGACG00000016731	spermatogenesis associated 5	ENSONIG00000001421	Similarity:Belongs to the AAA ATPase family.	SPATA5	spermatogenesis associated 5	1	1	no	0	0	0	0	0	0	0	0	0	0
EOG090C04RN	ENSGACG00000013263;ENSGACG00000020862	glycerophosphodiester phosphodiesterase domain containing 4a ;glycerophosphodiester phosphodiesterase domain containing 4b	ENSONIG00000001422;ENSONIG00000009570	Transmembrane:Helical;Transmembrane:Helical	gdpd4a;gdpd4b	glycerophosphodiester phosphodiesterase domain containing 4a ;glycerophosphodiester phosphodiesterase domain containing 4b	2	2	no	0	0	0	0	0	0	0	0	0	0
EOG090C0EW6	ENSGACG00000013984	small nuclear ribonucleoprotein 25	ENSONIG00000001423	small nuclear ribonucleoprotein 25	snrnp25	small nuclear ribonucleoprotein 25	1	1	yes	0	0	0	0	0	0	0	0	1	1
EOG090C0FOA	ENSGACG00000013978	polymerase (RNA) III (DNA directed) polypeptide K	ENSONIG00000001424	DNA-directed RNA polymerase subunit	polr3k	RNA polymerase III subunit K	1	1	no	0	0	0	0	0	0	0	0	0	0
EOG090C0FK9	ENSGACG00000013969	cell death-inducing p53 target 1	ENSONIG00000001425	cell death-inducing p53 target 1	cdip1	cell death-inducing p53 target 1	1	1	no	0	0	0	0	0	0	0	0	0	0
EOG090C058S	ENSGACG00000010557	potassium channel, subfamily K, member 10b	ENSONIG00000001426;ENSONIG00000001638	Similarity:Belongs to the two pore domain potassium channel (TC 1.A.1.8) family.;Similarity:Belongs to the two pore domain potassium channel (TC 1.A.1.8) family.	kcnk10b;kcnk10a	potassium two pore domain channel subfamily K member 10 ;potassium channel subfamily K member 10	1	2	no	0	0	0	0	0	0	0	0	0	0
EOG090C00SB	ENSGACG00000016734	ankyrin repeat domain 50	ENSONIG00000001427	Similarity:Contains 17 ANK repeats.	ANKRD50	ankyrin repeat domain 50	1	1	yes	0	0	0	0	0	0	0	0	1	0
EOG090C04RH	ENSGACG00000013960	mahogunin, ring finger 1b	ENSONIG00000001428	mahogunin, ring finger 1b	mgrn1b	mahogunin, ring finger 1b	1	1	no	0	0	0	0	0	0	0	0	0	0
EOG090C06OF	ENSGACG00000018429;ENSGACG00000018430	\N;\N	ENSONIG00000001429;ENSONIG00000003461	Similarity:Contains C-type lectin domain.;Similarity:Contains C-type lectin domain.	;	;CD209 antigen	2	2	yes	0	0	0	0	0	1	2	0	0	1
EOG090C05M0	ENSGACG00000013257	\N	ENSONIG00000001430	Non-specific serine/threonine protein kinase	pak1	p21 (RAC1) activated kinase 1	1	1	no	0	0	0	0	0	0	0	0	0	0
EOG090C000E	ENSGACG00000016736	FAT atypical cadherin 4	ENSONIG00000001431	FAT atypical cadherin 4	FAT4	FAT atypical cadherin 4	1	1	yes	0	1	0	0	0	0	0	0	0	0
EOG090C0CVU	ENSGACG00000011726	suppressor of Ty 3 homolog (S. cerevisiae)	ENSONIG00000001432	suppressor of Ty 3 homolog (S. cerevisiae)	supt3h	SPT3 homolog, SAGA and STAGA complex component	1	1	no	0	0	0	0	0	0	0	0	0	0
EOG090C09Q3	ENSGACG00000010583	bradykinin receptor B1	ENSONIG00000001434	Similarity:Belongs to the G-protein coupled receptor 1 family.	bdkrb1	bradykinin receptor B1	1	1	no	0	0	0	0	0	0	0	0	0	0
EOG090C09EV	ENSGACG00000010586	bradykinin receptor B2	ENSONIG00000001435	Similarity:Belongs to the G-protein coupled receptor 1 family.	BDKRB2 (1 of many)	B2 bradykinin receptor	1	1	no	0	0	0	0	0	0	0	0	0	0
EOG090C0CEQ	ENSGACG00000011721	\N	ENSONIG00000001436	Uncharacterized protein			1	1	no	0	0	0	0	0	0	0	0	0	0
EOG090C0B0X	ENSGACG00000011701	\N	ENSONIG00000001437	EF-hand domain pair			1	1	no	0	0	0	0	0	0	0	0	0	0
EOG090C0DI5	ENSGACG00000013957	arylalkylamine N-acetyltransferase 2	ENSONIG00000001439	arylalkylamine N-acetyltransferase 2	aanat2	arylalkylamine N-acetyltransferase 2	1	1	no	0	0	0	0	0	0	0	0	0	0
EOG090C0CKN	ENSGACG00000003669;ENSGACG00000011699	connexin 45.6 ;connexin 41.8	ENSONIG00000001440;ENSONIG00000020670	Gap junction protein;Gap junction protein	;GJA5	gap junction alpha-5 protein ;gap junction protein alpha 5	2	2	no	0	0	0	0	0	0	0	0	0	0
EOG090C0213	ENSGACG00000004465;ENSGACG00000013948	rhomboid 5 homolog 1 (Drosophila) ;rhomboid 5 homolog 1b (Drosophila)	ENSONIG00000001441;ENSONIG00000019770	Inactive rhomboid protein;Inactive rhomboid protein	rhbdf1a;rhbdf1b	rhomboid 5 homolog 1a (Drosophila) ;rhomboid 5 homolog 1b (Drosophila)	2	2	yes	0	0	0	0	0	1	0	0	0	0
EOG090C0G0X	ENSGACG00000016228;ENSGACG00000016745	leptin receptor overlapping transcript ;leptin receptor overlapping transcript-like 1	ENSONIG00000001442;ENSONIG00000018625	Transmembrane:Helical;Transmembrane:Helical	zgc:92045;LEPROT	leptin receptor overlapping transcript like 1 ;leptin receptor overlapping transcript	2	2	no	0	0	0	0	0	0	0	0	0	0
EOG090C0DDA	ENSGACG00000020861	aquaporin 11	ENSONIG00000001443;ENSONIG00000009574	aquaporin 11 ;Transmembrane:Helical	aqp11;	aquaporin 11 ;	1	2	no	0	0	0	0	0	0	0	0	0	0
EOG090C0EVE	ENSGACG00000013233	chloride channel, nucleotide-sensitive, 1A	ENSONIG00000001444;ENSONIG00000017900	chloride channel, nucleotide-sensitive, 1A ;chloride channel, nucleotide-sensitive, 1A	clns1a;	chloride channel, nucleotide-sensitive, 1A ;	1	2	no	0	0	0	0	0	0	0	0	0	0
EOG090C04CA	ENSGACG00000016749	signal recognition particle 72	ENSONIG00000001446	Signal recognition particle subunit SRP72	srp72	signal recognition particle 72	1	1	no	0	0	0	0	0	0	0	0	0	0
EOG090C0FZ1	ENSGACG00000011687	cytochrome c, somatic b	ENSONIG00000001448;ENSONIG00000008589	Function:Electron carrier protein. The oxidized form of the cytochrome c heme group can accept an electron from the heme group of the cytochrome c1 subunit of cytochrome reductase. Cytochrome c then transfers this electron to the cytochrome oxidase complex, the final protein carrier in the mitochondrial electron-transport chain.;Function:Electron carrier protein. The oxidized form of the cytochro…	;cycsb	cytochrome c ;cytochrome c-b	1	2	no	0	0	0	0	0	0	0	0	0	0
EOG090C08DE	ENSGACG00000011659	RNA binding motif protein 45	ENSONIG00000001450	RNA binding motif protein 45	rbm45	RNA binding motif protein 45	1	1	no	0	0	0	0	0	0	0	0	0	0
EOG090C0A4T	ENSGACG00000000507;ENSGACG00000003123	gonadotropin releasing hormone receptor 1 ;gonadotropin-releasing hormone receptor	ENSONIG00000001452	Transmembrane:Helical			2	1	yes	0	0	0	0	1	0	0	1	0	0
EOG090C0AEH	ENSGACG00000013945	N-methylpurine DNA glycosylase	ENSONIG00000001453	N-methylpurine DNA glycosylase	mpg	N-methylpurine DNA glycosylase	1	1	no	0	0	0	0	0	0	0	0	0	0
EOG090C04CN	ENSGACG00000013930	NPR3-like, GATOR1 complex subunit	ENSONIG00000001454	NPR3-like, GATOR1 complex subunit	nprl3	NPR3-like, GATOR1 complex subunit	1	1	no	0	0	0	0	0	0	0	0	0	0
EOG090C0CJD	ENSGACG00000011648	zinc finger CCCH-type containing 15	ENSONIG00000001456	zinc finger CCCH-type containing 15	zc3h15	zinc finger CCCH-type containing 15	1	1	no	0	0	0	0	0	0	0	0	0	0
EOG090C08ZL	ENSGACG00000017475	tripartite motif containing 47	ENSONIG00000001459;ENSONIG00000001462;ENSONIG00000001492;ENSONIG00000007809;ENSONIG00000007813;ENSONIG00000007817;ENSONIG00000008485;ENSONIG00000009891;ENSONIG00000011675;ENSONIG00000011690;ENSONIG00000011693;ENSONIG00000011881;ENSONIG00000011900;ENSONIG00000012704;ENSONIG00000013643;ENSONIG00000013713;ENSONIG00000016202;ENSONIG00000016457;ENSONIG00000017287;ENSONIG00000017289;ENSONIG00000017302;…	Similarity:Contains B30.2/SPRY domain.;Similarity:Contains B30.2/SPRY domain.;Similarity:Contains B30.2/SPRY domain.;Similarity:Contains B30.2/SPRY domain.;Similarity:Contains B30.2/SPRY domain.;Similarity:Contains B30.2/SPRY domain.;Similarity:Contains B30.2/SPRY domain.;Similarity:Contains B30.2/SPRY domain.;Similarity:Contains B30.2/SPRY domain.;Similarity:Contains B30.2/SPRY domain.;Similarit…	;;;;;;;;;;;;;;;;;;;;;;;;;;;;;;;;;;;;;	;;;;;;;;;;;;;;;;;;;;;;;;;;;;;;;;;;;;tripartite motif-containing protein 16-like ;tripartite motif-containing protein 16-like	1	38	yes	0	1	0	0	0	0	0	0	0	0
EOG090C0ERM	ENSGACG00000008166;ENSGACG00000011638	dual specificity phosphatase 19a ;dual specificity phosphatase 19b	ENSONIG00000001463;ENSONIG00000016239	dual specificity phosphatase 19b ;dual specificity phosphatase 19a	DUSP19 (1 of many);dusp19a	dual specificity protein phosphatase 19 ;dual specificity phosphatase 19	2	2	yes	0	0	0	0	0	1	1	0	0	0
EOG090C0DOJ	ENSGACG00000017987	ependymin related 1	ENSONIG00000001465	ependymin related 1	epdr1	mammalian ependymin-related protein 1	1	1	no	0	0	0	0	0	0	0	0	0	0
EOG090C016T	ENSGACG00000011628	NCK-associated protein 1	ENSONIG00000001468	NCK-associated protein 1	nckap1	NCK associated protein 1	1	1	no	0	0	0	0	0	0	0	0	0	0
EOG090C0FJ8	ENSGACG00000017989	nucleolar protein 7	ENSONIG00000001469	nucleolar protein 7	nol7	nucleolar protein 7	1	1	no	0	0	0	0	0	0	0	0	0	0
EOG090C0FOY	ENSGACG00000013869;ENSGACG00000013873;ENSGACG00000013880;ENSGACG00000013889;ENSGACG00000013902;ENSGACG00000014492	\N;\N;\N;\N;\N;\N	ENSONIG00000001470;ENSONIG00000001480;ENSONIG00000001504;ENSONIG00000001517;ENSONIG00000019777	Similarity:Belongs to the globin family.;Similarity:Belongs to the globin family.;Similarity:Belongs to the globin family.;Similarity:Belongs to the globin family.;Similarity:Belongs to the globin family.	;;si:ch211-5k11.8;;hbae5	;hemoglobin embryonic subunit alpha-like ;hemoglobin subunit alpha-B ;hemoglobin embryonic subunit alpha ;hemoglobin, alpha embryonic 5	6	5	no	0	0	0	0	0	0	0	0	0	0
EOG090C04KI	ENSGACG00000017991	RAN binding protein 9	ENSONIG00000001471	Similarity:Contains CTLH domain.	ranbp9	RAN binding protein 9	1	1	no	0	0	0	0	0	0	0	0	0	0
EOG090C0F3T	ENSGACG00000013871;ENSGACG00000013876;ENSGACG00000013882;ENSGACG00000013891;ENSGACG00000013895;ENSGACG00000013918	\N;\N;\N;\N;\N;beta globin (LOC100174873), mRNA	ENSONIG00000001473;ENSONIG00000001515;ENSONIG00000019774	Similarity:Belongs to the globin family.;Similarity:Belongs to the globin family.;Similarity:Belongs to the globin family.	;;hbbe3	;;hemoglobin beta embryonic-3	6	3	yes	0	0	0	0	1	1	1	1	1	1
EOG090C08VK	ENSGACG00000009954	BCL2/adenovirus E1B 19kD interacting protein, like	ENSONIG00000001474;ENSONIG00000003964	BCL2/adenovirus E1B 19kD interacting protein, like ;BCL2/adenovirus E1B 19kD interacting protein like	bnipl;	BCL2 interacting protein like ;	1	2	no	0	0	0	0	0	0	0	0	0	0
EOG090C03VU	ENSGACG00000012432	myelin associated glycoprotein	ENSONIG00000001476	Transmembrane:Helical	mag	myelin associated glycoprotein	1	1	yes	0	0	0	0	0	0	1	0	0	0
EOG090C098B	ENSGACG00000016750	small nuclear RNA activating complex, polypeptide 1a	ENSONIG00000001477	small nuclear RNA activating complex, polypeptide 1a			1	1	no	0	0	0	0	0	0	0	0	0	0
EOG090C0CZC	ENSGACG00000016751	ADP-ribosylation factor-like 9	ENSONIG00000001478	Transmembrane:Helical	arl9	ADP ribosylation factor like GTPase 9	1	1	no	0	0	0	0	0	0	0	0	0	0
EOG090C072W	ENSGACG00000012423	lipolysis stimulated lipoprotein receptor	ENSONIG00000001479	Transmembrane:Helical	lsr	lipolysis stimulated lipoprotein receptor	1	1	yes	0	0	0	0	0	0	0	1	0	0
EOG090C0F84	ENSGACG00000011623	protein phosphatase 1, regulatory (inhibitor) subunit 1C	ENSONIG00000001481	protein phosphatase 1, regulatory (inhibitor) subunit 1C			1	1	yes	0	1	0	0	0	0	0	0	0	0
EOG090C0GT3	ENSGACG00000016755	HOP homeobox	ENSONIG00000001482	HOP homeobox	hopx	HOP homeobox	1	1	no	0	0	0	0	0	0	0	0	0	0
EOG090C01F1	ENSGACG00000016757	SEC24 family member B	ENSONIG00000001483	SEC24 family member B	sec24b	SEC24 homolog B, COPII coat complex component	1	1	no	0	0	0	0	0	0	0	0	0	0
EOG090C09Y6	ENSGACG00000003223	prune exopolyphosphatase	ENSONIG00000001484	prune exopolyphosphatase	prune	prune exopolyphosphatase	1	1	no	0	0	0	0	0	0	0	0	0	0
EOG090C0DG9	ENSGACG00000011619	pleckstrin homology domain containing, family A (phosphoinositide binding specific) member 3	ENSONIG00000001485	Similarity:Contains 1 PH domain.			1	1	no	0	0	0	0	0	0	0	0	0	0
EOG090C0A1N	ENSGACG00000018000	family with sequence similarity 134, member B	ENSONIG00000001487	Transmembrane:Helical	retreg1	reticulophagy regulator 1	1	1	no	0	0	0	0	0	0	0	0	0	0
EOG090C01BH	ENSGACG00000003217	myosin IE, b	ENSONIG00000001490	Similarity:Contains 1 SH3 domain.	myo1eb	myosin IE, b	1	1	yes	0	0	0	0	0	0	0	1	0	0
EOG090C05P5	ENSGACG00000001007	kelch-like family member 10	ENSONIG00000001491	Similarity:Contains 1 BTB (POZ) domain.			1	1	no	0	0	0	0	0	0	0	0	0	0
EOG090C0FZ8	ENSGACG00000011475	luteinizing hormone, beta polypeptide	ENSONIG00000001493	Similarity:Belongs to the glycoprotein hormones subunit beta family.	lhb	gonadotropin subunit beta-2	1	1	yes	0	0	0	0	1	0	1	0	0	0
EOG090C0A0O	ENSGACG00000017737	cyclin E2	ENSONIG00000001494	Similarity:Belongs to the cyclin family.	ccne2	G1/S-specific cyclin-E2	1	1	no	0	0	0	0	0	0	0	0	0	0
EOG090C0G0I	ENSGACG00000011471	COX20 cytochrome c oxidase assembly factor	ENSONIG00000001495	Transmembrane:Helical		cytochrome c oxidase assembly protein COX20, mitochondrial	1	1	no	0	0	0	0	0	0	0	0	0	0
EOG090C06EL	ENSGACG00000011422;ENSGACG00000017814	solute carrier family 22 (organic anion transporter), member 7 ;solute carrier family 22 (organic anion transporter), member 7b, tandem duplicate 3	ENSONIG00000001497;ENSONIG00000017614;ENSONIG00000017616	Transmembrane:Helical;Transmembrane:Helical;Transmembrane:Helical	zmp:0000001102;;	zmp:0000001102 ;;	2	3	no	0	0	0	0	0	0	0	0	0	0
EOG090C069B	ENSGACG00000016763	thiosulfate sulfurtransferase (rhodanese)-like domain containing 2	ENSONIG00000001500	thiosulfate sulfurtransferase (rhodanese)-like domain containing 2	TSTD2	thiosulfate sulfurtransferase like domain containing 2	1	1	no	0	0	0	0	0	0	0	0	0	0
EOG090C0EGB	ENSGACG00000017744	tumor protein p53 inducible nuclear protein 1	ENSONIG00000001501	tumor protein p53 inducible nuclear protein 1	tp53inp1	tumor protein p53 inducible nuclear protein 1	1	1	no	0	0	0	0	0	0	0	0	0	0
EOG090C02MN	ENSGACG00000016772	nuclear cap binding protein subunit 1, 80kDa	ENSONIG00000001502	nuclear cap binding protein subunit 1, 80kDa	NCBP1	nuclear cap binding protein subunit 1	1	1	no	0	0	0	0	0	0	0	0	0	0
EOG090C048S	ENSGACG00000017746	N-acetylglucosamine-1-phosphodiester alpha-N-acetylglucosaminidase	ENSONIG00000001503	N-acetylglucosamine-1-phosphodiester alpha-N-acetylglucosaminidase	nagpa	N-acetylglucosamine-1-phosphodiester alpha-N-acetylglucosaminidase	1	1	no	0	0	0	0	0	0	0	0	0	0
EOG090C02HN	ENSGACG00000011414	endothelial PAS domain protein 1b	ENSONIG00000001505	Similarity:Contains 1 basic helix-loop-helix (bHLH) domain.	epas1b	endothelial PAS domain protein 1	1	1	no	0	0	0	0	0	0	0	0	0	0
EOG090C09JC	ENSGACG00000017747	NADH dehydrogenase (ubiquinone) complex I, assembly factor 6	ENSONIG00000001506	NADH dehydrogenase (ubiquinone) complex I, assembly factor 6	ndufaf6	NADH:ubiquinone oxidoreductase complex assembly factor 6	1	1	no	0	0	0	0	0	0	0	0	0	0
EOG090C08IG	ENSGACG00000017749	WD repeat domain 73	ENSONIG00000001508	WD repeat domain 73	wdr73	WD repeat domain 73	1	1	no	0	0	0	0	0	0	0	0	0	0
EOG090C0148	ENSGACG00000000941	sortilin-related VPS10 domain containing receptor 2	ENSONIG00000001509	Transmembrane:Helical	sorcs2	sortilin-related VPS10 domain containing receptor 2	1	1	no	0	0	0	0	0	0	0	0	0	0
EOG090C0GEG	ENSGACG00000017752	chromosome 8 open reading frame 37	ENSONIG00000001511	chromosome 8 open reading frame 37			1	1	no	0	0	0	0	0	0	0	0	0	0
EOG090C0CK7	ENSGACG00000000339;ENSGACG00000017753	CD83 molecule ;CD83 molecule	ENSONIG00000001512	Transmembrane:Helical		CD83 molecule	2	1	no	0	0	0	0	0	0	0	0	0	0
EOG090C06K3	ENSGACG00000003205	selenium binding protein 1	ENSONIG00000001513	selenium binding protein 1	selenbp1	selenium binding protein 1	1	1	no	0	0	0	0	0	0	0	0	0	0
EOG090C0DAL	ENSGACG00000000958	GrpE-like 1, mitochondrial	ENSONIG00000001516	GrpE protein homolog	grpel1	GrpE like 1, mitochondrial	1	1	no	0	0	0	0	0	0	0	0	0	0
EOG090C0AMQ	ENSGACG00000003189	\N	ENSONIG00000001518	Similarity:Belongs to the short-chain dehydrogenases/reductases (SDR) family.	si:dkey-23o4.6	si:dkey-23o4.6	1	1	yes	0	0	0	0	0	1	1	0	0	0
EOG090C08AC	ENSGACG00000000960	transcriptional adaptor 2B	ENSONIG00000001519	transcriptional adaptor 2B	tada2b	transcriptional adaptor 2B	1	1	no	0	0	0	0	0	0	0	0	0	0
EOG090C0BE5	ENSGACG00000017756	small nuclear ribonucleoprotein 48 (U11/U12)	ENSONIG00000001520	small nuclear ribonucleoprotein 48 (U11/U12)	snrnp48	small nuclear ribonucleoprotein U11/U12 subunit 48	1	1	no	0	0	0	0	0	0	0	0	0	0
EOG090C01WK	ENSGACG00000000923	natriuretic peptide receptor 1b	ENSONIG00000001521;ENSONIG00000007561	Guanylate cyclase;Guanylate cyclase	npr1b;	natriuretic peptide receptor 1b ;natriuretic peptide receptor 1	1	2	no	0	0	0	0	0	0	0	0	0	0
EOG090C036H	ENSGACG00000020066	TBC1 domain family, member 14	ENSONIG00000001523	TBC1 domain family, member 14	tbc1d14	TBC1 domain family, member 14	1	1	no	0	0	0	0	0	0	0	0	0	0
EOG090C01W1	ENSGACG00000013864	KN motif and ankyrin repeat domains 2	ENSONIG00000001524	Similarity:Contains 5 ANK repeats.	kank2	KN motif and ankyrin repeat domains 2	1	1	no	0	0	0	0	0	0	0	0	0	0
EOG090C08OH	ENSGACG00000016791	major facilitator superfamily domain containing 7	ENSONIG00000001525	Transmembrane:Helical	SLC49A3	solute carrier family 49 member 3	1	1	no	0	0	0	0	0	0	0	0	0	0
EOG090C009E	ENSGACG00000013853	dedicator of cytokinesis 6	ENSONIG00000001526	dedicator of cytokinesis 6	dock6	dedicator of cytokinesis 6	1	1	no	0	0	0	0	0	0	0	0	0	0
EOG090C02YL	ENSGACG00000002801;ENSGACG00000011409	\N;protein kinase C, epsilon b	ENSONIG00000001528;ENSONIG00000015884	Protein kinase C;Protein kinase C	prkceb;	protein kinase C epsilon type ;protein kinase C epsilon type	2	2	no	0	0	0	0	0	0	0	0	0	0
EOG090C0114	ENSGACG00000020062;ENSGACG00000020063	zgc:158564 ;zgc:158564	ENSONIG00000001530	zgc:158564	zgc:158564	KIAA0232 ortholog	2	1	no	0	0	0	0	0	0	0	0	0	0
EOG090C0BKW	ENSGACG00000016794	polycomb group ring finger 3	ENSONIG00000001532	polycomb group ring finger 3	PCGF3	polycomb group ring finger 3	1	1	yes	0	0	1	0	0	0	0	0	0	0
EOG090C0GM3	ENSGACG00000020061	S100 calcium binding protein P	ENSONIG00000001536	S100 calcium-binding protein	S100P (1 of many)	protein S100-G	1	1	no	0	0	0	0	0	0	0	0	0	0
EOG090C082O	ENSGACG00000013839	ELAV like neuron-specific RNA binding protein 3	ENSONIG00000001538	ELAV-like protein	elavl3	ELAV like neuron-specific RNA binding protein 3	1	1	yes	0	0	0	0	0	0	0	0	1	0
EOG090C0GAV	ENSGACG00000016352;ENSGACG00000016796;ENSGACG00000018603	complexin 2 ;complexin 1 ;complexin 2, like	ENSONIG00000001539;ENSONIG00000016225	complexin 1 ;complexin 2, like	;cplx2l	;complexin-1	3	2	yes	0	0	0	0	0	0	0	0	1	0
EOG090C07LI	ENSGACG00000020057	solute carrier family 29 (equilibrative nucleoside transporter), member 2	ENSONIG00000001540	Transmembrane:Helical	SLC29A2	equilibrative nucleoside transporter 2	1	1	no	0	0	0	0	0	0	0	0	0	0
EOG090C05BR	ENSGACG00000016798	smu-1 suppressor of mec-8 and unc-52 homolog a (C. elegans)	ENSONIG00000001541	Similarity:Contains CTLH domain.	SMU1 (1 of many)	WD40 repeat-containing protein SMU1	1	1	no	0	0	0	0	0	0	0	0	0	0
EOG090C06KH	ENSGACG00000013828	protein kinase C substrate 80K-H	ENSONIG00000001542	protein kinase C substrate 80K-H	prkcsh	protein kinase C substrate 80K-H	1	1	no	0	0	0	0	0	0	0	0	0	0
EOG090C00WR	ENSGACG00000004219;ENSGACG00000017768	brevican ;brevican	ENSONIG00000001543;ENSONIG00000019771	Similarity:Contains C-type lectin domain.;Similarity:Contains C-type lectin domain.	bcan;	brevican ;	2	2	no	0	0	0	0	0	0	0	0	0	0
EOG090C04R7	ENSGACG00000020039	v-rel avian reticuloendotheliosis viral oncogene homolog A	ENSONIG00000001545	Similarity:Contains 1 RHD (Rel-like) domain.	rela	RELA proto-oncogene, NF-kB subunit	1	1	no	0	0	0	0	0	0	0	0	0	0
EOG090C0FMR	ENSGACG00000020035	DR1-associated protein 1 (negative cofactor 2 alpha)	ENSONIG00000001546	DR1-associated protein 1 (negative cofactor 2 alpha)	drap1	DR1-associated protein 1 (negative cofactor 2 alpha)	1	1	no	0	0	0	0	0	0	0	0	0	0
EOG090C08C6	ENSGACG00000017775	hyaluronan and proteoglycan link protein 2	ENSONIG00000001547	Transmembrane:Helical	hapln2	hyaluronan and proteoglycan link protein 2	1	1	no	0	0	0	0	0	0	0	0	0	0
EOG090C04AX	ENSGACG00000013825	phosphodiesterase 4A, cAMP-specific	ENSONIG00000001548	phosphodiesterase 4A, cAMP-specific	pde4a	phosphodiesterase 4A, cAMP-specific	1	1	yes	0	0	0	0	0	0	0	0	1	0
EOG090C07X9	ENSGACG00000017782	Rh family, B glycoprotein (gene/pseudogene)	ENSONIG00000001550	Transmembrane:Helical	rhbg	ammonium transporter Rh type B	1	1	yes	0	0	0	0	0	1	0	1	0	0
EOG090C021B	ENSGACG00000020033	mitogen-activated protein kinase kinase kinase 11	ENSONIG00000001551	Catalytic Activity:ATP + a	si:cabz01078036.1		1	1	no	0	0	0	0	0	0	0	0	0	0
EOG090C0CQJ	ENSGACG00000000939	DEK proto-oncogene	ENSONIG00000001553	DEK proto-oncogene			1	1	no	0	0	0	0	0	0	0	0	0	0
EOG090C078C	ENSGACG00000004227	myocyte enhancer factor 2d	ENSONIG00000001554;ENSONIG00000019767	Similarity:Contains 1 MADS-box domain.;Similarity:Contains 1 MADS-box domain.	mef2d;MEF2D	myocyte enhancer factor 2d ;myocyte-specific enhancer factor 2D homolog	1	2	no	0	0	0	0	0	0	0	0	0	0
EOG090C00ZS	ENSGACG00000016803	inhibitor of kappa light polypeptide gene enhancer in B-cells, kinase complex-associated protein	ENSONIG00000001555	Elongator complex protein 1	elp1	elongator complex protein 1	1	1	no	0	0	0	0	0	0	0	0	0	0
EOG090C0843	ENSGACG00000000950	potassium channel, voltage gated modifier subfamily V, member 1	ENSONIG00000001556	Transmembrane:Helical	si:dkey-201i6.2	potassium voltage-gated channel modifier subfamily V member 1	1	1	no	0	0	0	0	0	0	0	0	0	0
EOG090C0541	ENSGACG00000006648	gdnf family receptor alpha 1b	ENSONIG00000001558;ENSONIG00000016412	gdnf family receptor alpha 1a ;gdnf family receptor alpha 1b	GFRA1;	GDNF family receptor alpha 1 ;GDNF family receptor alpha-1	1	2	no	0	0	0	0	0	0	0	0	0	0
EOG090C0432	ENSGACG00000013818	ribonucleoprotein, PTB-binding 1	ENSONIG00000001559	ribonucleoprotein, PTB-binding 1	raver1	ribonucleoprotein, PTB-binding 1	1	1	no	0	0	0	0	0	0	0	0	0	0
EOG090C0DX5	ENSGACG00000000389;ENSGACG00000000408;ENSGACG00000000547;ENSGACG00000000548	\N;\N;\N;\N	ENSONIG00000001560;ENSONIG00000005132;ENSONIG00000006732;ENSONIG00000007394	Transmembrane:Helical;Transmembrane:Helical;Transmembrane:Helical;Transmembrane:Helical	;;;	;;;	4	4	yes	0	0	0	0	0	1	1	0	1	0
EOG090C01QW	ENSGACG00000013787	tyrosine kinase 2	ENSONIG00000001561	Tyrosine-protein kinase	tyk2	tyrosine kinase 2	1	1	no	0	0	0	0	0	0	0	0	0	0
EOG090C0F42	ENSGACG00000003178	acidic (leucine-rich) nuclear phosphoprotein 32 family, member E	ENSONIG00000001563	acidic (leucine-rich) nuclear phosphoprotein 32 family, member E	ANP32E	acidic nuclear phosphoprotein 32 family member E	1	1	no	0	0	0	0	0	0	0	0	0	0
EOG090C0CN5	ENSGACG00000011392	si:ch1073-126c3.2	ENSONIG00000001564	si:ch1073-126c3.2	si:ch1073-126c3.2	uncharacterized LOC102080399	1	1	no	0	0	0	0	0	0	0	0	0	0
EOG090C0AEY	ENSGACG00000003185	pleckstrin homology domain containing, family O member 1b	ENSONIG00000001565	Similarity:Contains 1 PH domain.	plekho1b	pleckstrin homology domain containing O1	1	1	yes	0	0	0	0	0	0	0	0	0	1
EOG090C0BGI	ENSGACG00000011333	carbonyl reductase 1	ENSONIG00000001566;ENSONIG00000001572;ENSONIG00000001575;ENSONIG00000001577	Similarity:Belongs to the short-chain dehydrogenases/reductases (SDR) family.;Similarity:Belongs to the short-chain dehydrogenases/reductases (SDR) family.;Similarity:Belongs to the short-chain dehydrogenases/reductases (SDR) family.;Similarity:Belongs to the short-chain dehydrogenases/reductases (SDR) family.	;;cbr1;CBR1	;carbonyl reductase ;carbonyl reductase 1 ;carbonyl reductase 1	1	4	no	0	0	0	0	0	0	0	0	0	0
EOG090C0C7O	ENSGACG00000002937	\N	ENSONIG00000001567	cAMP responsive element binding protein 3-like 4	CREB3L4	cAMP responsive element binding protein 3 like 4	1	1	no	0	0	0	0	0	0	0	0	0	0
EOG090C09IL	ENSGACG00000013773	cell division cycle 37	ENSONIG00000001568	cell division cycle 37	cdc37	cell division cycle 37 homolog (S. cerevisiae)	1	1	no	0	0	0	0	0	0	0	0	0	0
EOG090C046Q	ENSGACG00000016337	transforming growth factor, beta-induced	ENSONIG00000001569	transforming growth factor, beta-induced	tgfbi	transforming growth factor beta induced	1	1	no	0	0	0	0	0	0	0	0	0	0
EOG090C0ATV	ENSGACG00000013770	si:ch211-66e2.5	ENSONIG00000001573	si:ch211-66e2.5	si:ch211-66e2.5	si:ch211-66e2.5	1	1	no	0	0	0	0	0	0	0	0	0	0
EOG090C00KW	ENSGACG00000013741	DNA (cytosine-5-)-methyltransferase 1	ENSONIG00000001574;ENSONIG00000007221	DNA (cytosine-5)-methyltransferase;DNA (cytosine-5-)-methyltransferase 1	dnmt1;	DNA methyltransferase 1 ;DNA (cytosine-5)-methyltransferase 1	1	2	no	0	0	0	0	0	0	0	0	0	0
EOG090C068L	ENSGACG00000002942	CREB regulated transcription coactivator 2	ENSONIG00000001576	CREB regulated transcription coactivator 2	CRTC2	CREB regulated transcription coactivator 2	1	1	no	0	0	0	0	0	0	0	0	0	0
EOG090C00LI	ENSGACG00000004155	ubiquitin specific peptidase 19	ENSONIG00000001579	Similarity:Contains MYND-type zinc finger.	usp19	ubiquitin specific peptidase 19	1	1	no	0	0	0	0	0	0	0	0	0	0
EOG090C0AE0	ENSGACG00000011319	SET domain containing 4	ENSONIG00000001580	SET domain containing 4	setd4	SET domain containing 4	1	1	no	0	0	0	0	0	0	0	0	0	0
EOG090C0BIL	ENSGACG00000011307	crystallin, zeta (quinone reductase)-like 1	ENSONIG00000001581	crystallin, zeta (quinone reductase)-like 1	cryzl1	crystallin, zeta (quinone reductase)-like 1	1	1	no	0	0	0	0	0	0	0	0	0	0
EOG090C00PD	ENSGACG00000002947	DENN/MADD domain containing 4B	ENSONIG00000001582	DENN/MADD domain containing 4B	dennd4b	DENN domain containing 4B	1	1	no	0	0	0	0	0	0	0	0	0	0
EOG090C0CJS	ENSGACG00000016332	exosome component 3	ENSONIG00000001583	exosome component 3	exosc3	exosome component 3	1	1	no	0	0	0	0	0	0	0	0	0	0
EOG090C00FI	ENSGACG00000004167	laminin, beta 2 (laminin S)	ENSONIG00000001584	laminin, beta 2 (laminin S)	lamb2	laminin subunit beta-2	1	1	no	0	0	0	0	0	0	0	0	0	0
EOG090C08HQ	ENSGACG00000016321	DP-Gal:betaGlcNAc beta 1,4- galactosyltransferase, polypeptide 1, like	ENSONIG00000001585	DP-Gal:betaGlcNAc beta 1,4- galactosyltransferase, polypeptide 1, like			1	1	no	0	0	0	0	0	0	0	0	0	0
EOG090C00OP	ENSGACG00000011288	intersectin 1 (SH3 domain protein)	ENSONIG00000001586	Similarity:Contains 1 C2 domain.	itsn1	intersectin 1 (SH3 domain protein)	1	1	no	0	0	0	0	0	0	0	0	0	0
EOG090C056H	ENSGACG00000002960	aldehyde dehydrogenase 5 family, member A1 (succinate-semialdehyde dehydrogenase)	ENSONIG00000001587	Similarity:Belongs to the aldehyde dehydrogenase family.	aldh5a1	aldehyde dehydrogenase 5 family, member A1 (succinate-semialdehyde dehydrogenase)	1	1	no	0	0	0	0	0	0	0	0	0	0
EOG090C0AEL	ENSGACG00000007013	pyridoxal (pyridoxine, vitamin B6) kinase a	ENSONIG00000001588;ENSONIG00000004377	pyridoxal (pyridoxine, vitamin B6) kinase b ;pyridoxal (pyridoxine, vitamin B6) kinase a	;pdxka	;pyridoxal kinase	1	2	no	0	0	0	0	0	0	0	0	0	0
EOG090C02BP	ENSGACG00000016320	RE1-silencing transcription factor	ENSONIG00000001589	RE1-silencing transcription factor	rest	RE1-silencing transcription factor	1	1	no	0	0	0	0	0	0	0	0	0	0
EOG090C07X4	ENSGACG00000016318	nitric oxide associated 1	ENSONIG00000001590	nitric oxide associated 1	noa1	nitric oxide associated 1	1	1	no	0	0	0	0	0	0	0	0	0	0
EOG090C0BL0	ENSGACG00000013475;ENSGACG00000015364	\N;\N	ENSONIG00000001591;ENSONIG00000004104;ENSONIG00000018853	Uncharacterized protein ;Uncharacterized protein ;Uncharacterized protein	;;	;;	2	3	no	0	0	0	0	0	0	0	0	0	0
EOG090C0ACP	ENSGACG00000013727	eukaryotic translation initiation factor 3, subunit G	ENSONIG00000001592	Eukaryotic translation initiation factor 3 RNA-binding subunit	eif3g	eukaryotic translation initiation factor 3 subunit G	1	1	no	0	0	0	0	0	0	0	0	0	0
EOG090C0FXU	ENSGACG00000000864;ENSGACG00000000869;ENSGACG00000001127;ENSGACG00000015818;ENSGACG00000018049;ENSGACG00000018643	\N;\N;\N;\N;\N;\N	ENSONIG00000001594;ENSONIG00000004797;ENSONIG00000004798;ENSONIG00000004804;ENSONIG00000004806;ENSONIG00000004808;ENSONIG00000004811;ENSONIG00000008735;ENSONIG00000009610;ENSONIG00000009614;ENSONIG00000009615;ENSONIG00000009616;ENSONIG00000009621;ENSONIG00000009622;ENSONIG00000009625;ENSONIG00000009629;ENSONIG00000013206;ENSONIG00000013207;ENSONIG00000013212;ENSONIG00000014109;ENSONIG00000014110;…	C-type lectin;Similarity:Contains C-type lectin domain.;Similarity:Contains C-type lectin domain.;Similarity:Contains C-type lectin domain.;Similarity:Contains C-type lectin domain.;C-type lectin;Similarity:Contains C-type lectin domain.;Similarity:Contains C-type lectin domain.;Similarity:Contains C-type lectin domain.;Similarity:Contains C-type lectin domain.;Similarity:Contains C-type lectin d…	;;;;;;;;;;;;;;;;;;;;;	;;;;;;ladderlectin-like ;;ladderlectin-like ;;;;ladderlectin ;;ladderlectin ;ladderlectin-like ;;ladderlectin ;;;;	6	22	no	0	0	0	0	0	0	0	0	0	0
EOG090C0DWN	ENSGACG00000016311	nipsnap homolog 3A (C. elegans)	ENSONIG00000001595	nipsnap homolog 3A (C. elegans)	nipsnap3a	protein NipSnap homolog 3A	1	1	no	0	0	0	0	0	0	0	0	0	0
EOG090C0668	ENSGACG00000001703;ENSGACG00000012890	paired box 7b ;paired box 7	ENSONIG00000001596;ENSONIG00000014283	Similarity:Contains 1 paired domain.;Similarity:Contains 1 paired domain.	;pax7a	;paired box 7	2	2	yes	0	0	0	0	0	0	0	0	0	2
EOG090C07IN	ENSGACG00000013723	peter pan homolog (Drosophila)	ENSONIG00000001598	peter pan homolog (Drosophila)	ppan	peter pan homolog	1	1	yes	0	0	0	0	0	0	1	0	0	1
EOG090C0079	ENSGACG00000016304;ENSGACG00000018583	ATP-binding cassette, sub-family A (ABC1), member 1B ;ATP-binding cassette, sub-family A (ABC1), member 1A	ENSONIG00000001599;ENSONIG00000016170	Similarity:Belongs to the ABC transporter superfamily.;Similarity:Belongs to the ABC transporter superfamily.	ABCA1 (1 of many);abca1a	ATP-binding cassette sub-family A member 1 ;ATP-binding cassette sub-family A member 1	2	2	no	0	0	0	0	0	0	0	0	0	0
EOG090C04IS	ENSGACG00000006251	mitogen-activated protein kinase kinase kinase 7	ENSONIG00000001600	Similarity:Belongs to the protein kinase superfamily.	map3k7	mitogen-activated protein kinase kinase kinase 7	1	1	no	0	0	0	0	0	0	0	0	0	0
EOG090C0823	ENSGACG00000009845	angiopoietin-like 6	ENSONIG00000001601	Similarity:Contains fibrinogen C-terminal domain.		angiopoietin-related protein 2	1	1	no	0	0	0	0	0	0	0	0	0	0
EOG090C063G	ENSGACG00000009852	\N	ENSONIG00000001602;ENSONIG00000001603	Uncharacterized protein ;Uncharacterized protein	;	;	1	2	no	0	0	0	0	0	0	0	0	0	0
EOG090C04WN	ENSGACG00000009854	thyroid hormone receptor interactor 10a	ENSONIG00000001604	Similarity:Contains 1 SH3 domain.	trip10a	cdc42-interacting protein 4 homolog	1	1	no	0	0	0	0	0	0	0	0	0	0
EOG090C01N1	ENSGACG00000004193	si:rp71-17i16.5	ENSONIG00000001605	Similarity:Contains PI3K/PI4K domain.	si:rp71-17i16.5	phosphatidylinositol 4,5-bisphosphate 3-kinase catalytic subunit gamma isoform	1	1	no	0	0	0	0	0	0	0	0	0	0
EOG090C02L5	ENSGACG00000006245	BTB and CNC homology 1, basic leucine zipper transcription factor 2b	ENSONIG00000001606	Similarity:Contains 1 BTB (POZ) domain.	bach2b	BTB and CNC homology 1, basic leucine zipper transcription factor 2b	1	1	no	0	0	0	0	0	0	0	0	0	0
EOG090C03C6	ENSGACG00000012833	mitofusin 2	ENSONIG00000001607	Similarity:Contains dynamin-type G (guanine nucleotide-binding) domain.	mfn2	mitofusin 2	1	1	no	0	0	0	0	0	0	0	0	0	0
EOG090C072C	ENSGACG00000006243	connexin 52.6	ENSONIG00000001608	Gap junction protein	cx52.6	gap junction protein alpha 10	1	1	no	0	0	0	0	0	0	0	0	0	0
EOG090C00H6	ENSGACG00000006239	caspase 8 associated protein 2	ENSONIG00000001609	caspase 8 associated protein 2		caspase 8 associated protein 2	1	1	no	0	0	0	0	0	0	0	0	0	0
EOG090C000Q	ENSGACG00000006188	midasin AAA ATPase 1	ENSONIG00000001610	midasin AAA ATPase 1	mdn1	midasin AAA ATPase 1	1	1	no	0	0	0	0	0	0	0	0	0	0
EOG090C0ENA	ENSGACG00000004196	troponin C type 2 (fast)	ENSONIG00000001611	troponin C type 2 (fast)	si:rp71-17i16.4	troponin C, skeletal muscle	1	1	yes	0	0	0	0	0	0	1	0	0	0
EOG090C0F8N	ENSGACG00000004198	troponin C type 2 (fast)	ENSONIG00000001612	troponin C type 2 (fast)	tnnc2	troponin C type 2 (fast)	1	1	yes	0	0	0	0	1	0	0	0	0	0
EOG090C05ZY	ENSGACG00000009875	olfactomedin 2a	ENSONIG00000001613	Similarity:Contains olfactomedin-like domain.	olfm2a	noelin-2	1	1	no	0	0	0	0	0	0	0	0	0	0
EOG090C00U8	ENSGACG00000004216	solute carrier family 35 (GDP-fucose transporter), member C2	ENSONIG00000001615	Transmembrane:Helical			1	1	no	0	0	0	0	0	0	0	0	0	0
EOG090C03V1	ENSGACG00000012177	ankyrin repeat domain 6b	ENSONIG00000001616	Similarity:Contains 8 ANK repeats.	ankrd6b	ankyrin repeat domain 6b	1	1	no	0	0	0	0	0	0	0	0	0	0
EOG090C095G	ENSGACG00000012830	pleiomorphic adenoma gene X	ENSONIG00000001617	pleiomorphic adenoma gene X			1	1	no	0	0	0	0	0	0	0	0	0	0
EOG090C0CBR	ENSGACG00000004245	dolichyl-phosphate mannosyltransferase polypeptide 1, catalytic subunit	ENSONIG00000001619	dolichyl-phosphate mannosyltransferase polypeptide 1, catalytic subunit	dpm1	dolichyl-phosphate mannosyltransferase subunit 1, catalytic	1	1	no	0	0	0	0	0	0	0	0	0	0
EOG090C005H	ENSGACG00000012274	zinc finger protein 292b	ENSONIG00000001620	zinc finger protein 292b	znf292b	zinc finger protein 292	1	1	no	0	0	0	0	0	0	0	0	0	0
EOG090C0752	ENSGACG00000013371	\N	ENSONIG00000001621;ENSONIG00000001831;ENSONIG00000003514;ENSONIG00000003520;ENSONIG00000005627;ENSONIG00000007324;ENSONIG00000007885;ENSONIG00000008813;ENSONIG00000016475;ENSONIG00000018454	Uncharacterized protein ;Uncharacterized protein ;Uncharacterized protein ;Uncharacterized protein ;Transmembrane:Helical;Uncharacterized protein ;Uncharacterized protein ;Uncharacterized protein ;Uncharacterized protein ;Uncharacterized protein	;;;;;;;;;	;;;;;;;;;	1	10	no	0	0	0	0	0	0	0	0	0	0
EOG090C01SV	ENSGACG00000004256	activity-dependent neuroprotector homeobox b	ENSONIG00000001623	activity-dependent neuroprotector homeobox b	adnpb	activity dependent neuroprotector homeobox	1	1	no	0	0	0	0	0	0	0	0	0	0
EOG090C0B91	ENSGACG00000012273	connexin 28.8	ENSONIG00000001624	Gap junction protein	cx28.8	connexin 28.8	1	1	no	0	0	0	0	0	0	0	0	0	0
EOG090C0BP6	ENSGACG00000004259	par-6 partitioning defective 6 homolog beta (C. elegans)	ENSONIG00000001625	Similarity:Contains 1 PDZ (DHR) domain.	pard6b	par-6 partitioning defective 6 homolog beta (C. elegans)	1	1	no	0	0	0	0	0	0	0	0	0	0
EOG090C0G8A	ENSGACG00000012249	small integral membrane protein 8	ENSONIG00000001626	Transmembrane:Helical	smim8	small integral membrane protein 8	1	1	yes	0	1	0	0	0	0	0	0	0	0
EOG090C061Q	ENSGACG00000012252	DEAD (Asp-Glu-Ala-Asp) box polypeptide 51	ENSONIG00000001627	Similarity:Belongs to the DEAD box helicase family.	ddx51	DEAD (Asp-Glu-Ala-Asp) box polypeptide 51	1	1	no	0	0	0	0	0	0	0	0	0	0
EOG090C00EA	ENSGACG00000004260	ADP-ribosylation factor guanine nucleotide-exchange factor 2 (brefeldin A-inhibited)	ENSONIG00000001628	Similarity:Contains SEC7 domain.	arfgef2	brefeldin A-inhibited guanine nucleotide-exchange protein 2	1	1	no	0	0	0	0	0	0	0	0	0	0
EOG090C09QN	ENSGACG00000012241	RAD51 recombinase	ENSONIG00000001629	Similarity:Belongs to the RecA family.	rad51	RAD51 recombinase	1	1	no	0	0	0	0	0	0	0	0	0	0
EOG090C08JY	ENSGACG00000012235	regulator of microtubule dynamics 3	ENSONIG00000001630	Transmembrane:Helical	rmdn3	regulator of microtubule dynamics 3	1	1	no	0	0	0	0	0	0	0	0	0	0
EOG090C03O4	ENSGACG00000016300;ENSGACG00000018031	solute carrier family 44 (choline transporter), member 1b ;solute carrier family 44 (choline transporter), member 1a	ENSONIG00000001631;ENSONIG00000014604	Transmembrane:Helical;Transmembrane:Helical	slc44a1b;	solute carrier family 44 (choline transporter), member 1b ;	2	2	no	0	0	0	0	0	0	0	0	0	0
EOG090C0EVJ	ENSGACG00000004283;ENSGACG00000010199	bcl2-like 1 ;BCL2-like 1	ENSONIG00000001632	Transmembrane:Helical	bcl2l1	BCL2 like 1	2	1	no	0	0	0	0	0	0	0	0	0	0
EOG090C0FBU	ENSGACG00000004286	cytochrome c oxidase subunit IV isoform 2	ENSONIG00000001633	Transmembrane:Helical	cox4i2	cytochrome c oxidase subunit 4 isoform 2, mitochondrial	1	1	no	0	0	0	0	0	0	0	0	0	0
EOG090C00GV	ENSGACG00000012209	si:ch211-241j12.3	ENSONIG00000001634	Similarity:Belongs to the actin family.			1	1	no	0	0	0	0	0	0	0	0	0	0
EOG090C03UC	ENSGACG00000012199	chromosome 6 open reading frame 165	ENSONIG00000001635	chromosome 6 open reading frame 165	cfap206	cilia and flagella associated protein 206	1	1	no	0	0	0	0	0	0	0	0	0	0
EOG090C0AZ8	ENSGACG00000004304	family with sequence similarity 110, member A	ENSONIG00000001636	family with sequence similarity 110, member A	FAM110A	family with sequence similarity 110 member A	1	1	no	0	0	0	0	0	0	0	0	0	0
EOG090C0970	ENSGACG00000004309	NSFL1 (p97) cofactor (p47)	ENSONIG00000001637	NSFL1 (p97) cofactor (p47)	nsfl1c	NSFL1 cofactor	1	1	no	0	0	0	0	0	0	0	0	0	0
EOG090C0926	ENSGACG00000005610	Meis homeobox 2b	ENSONIG00000001639	Meis homeobox 2b	meis2b	homeobox protein Meis2	1	1	no	0	0	0	0	0	0	0	0	0	0
EOG090C0FVI	ENSGACG00000004338;ENSGACG00000012061	FK506 binding protein 1Ab ;\N	ENSONIG00000001640;ENSONIG00000016814	Peptidyl-prolyl cis-trans isomerase;Peptidyl-prolyl cis-trans isomerase	fkbp1aa;	peptidyl-prolyl cis-trans isomerase FKBP1A ;	2	2	no	0	0	0	0	0	0	0	0	0	0
EOG090C0AM7	ENSGACG00000004361	syndecan binding protein (syntenin) 2	ENSONIG00000001641	Similarity:Contains 2 PDZ (DHR) domains.	sdcbp2	syntenin-1	1	1	no	0	0	0	0	0	0	0	0	0	0
EOG090C0A9H	ENSGACG00000009914;ENSGACG00000016530	retinol dehydrogenase 8a ;retinol dehydrogenase 8b	ENSONIG00000001642	Active Site:Proton acceptor	rdh8a	retinol dehydrogenase 8	2	1	no	0	0	0	0	0	0	0	0	0	0
EOG090C02XJ	ENSGACG00000004424	syntaphilin b	ENSONIG00000001643	syntaphilin b	snphb	syntaphilin b	1	1	no	0	0	0	0	0	0	0	0	0	0
EOG090C0058	ENSGACG00000009926	notch 3	ENSONIG00000001645	Similarity:Contains 6 ANK repeats.	notch3	notch 3	1	1	no	0	0	0	0	0	0	0	0	0	0
EOG090C0932	ENSGACG00000018948	\N	ENSONIG00000001647;ENSONIG00000001649;ENSONIG00000001836;ENSONIG00000001838;ENSONIG00000004541;ENSONIG00000007872;ENSONIG00000007874;ENSONIG00000009127;ENSONIG00000011614;ENSONIG00000012450;ENSONIG00000012453;ENSONIG00000019813	Uncharacterized protein ;Uncharacterized protein ;Similarity:Contains C-type lectin domain.;Uncharacterized protein ;Uncharacterized protein ;Uncharacterized protein ;Uncharacterized protein ;Similarity:Contains C-type lectin domain.;Uncharacterized protein ;Similarity:Contains C-type lectin domain.;Uncharacterized protein ;Uncharacterized protein	;;;;;;;;;;;	;C-type lectin lectoxin-Phi1-like ;;;;;;;;;;	1	12	no	0	0	0	0	0	0	0	0	0	0
EOG090C0B4L	ENSGACG00000005653	syntaxin binding protein 6 (amisyn), like	ENSONIG00000001648	syntaxin binding protein 6 (amisyn), like	stxbp6l	syntaxin binding protein 6 (amisyn), like	1	1	no	0	0	0	0	0	0	0	0	0	0
EOG090C042E	ENSGACG00000016633	heat shock protein 5	ENSONIG00000001651;ENSONIG00000002826;ENSONIG00000012430;ENSONIG00000012434;ENSONIG00000012446;ENSONIG00000012454;ENSONIG00000012462	Similarity:Belongs to the heat shock protein 70 family.;Similarity:Belongs to the heat shock protein 70 family.;Similarity:Belongs to the heat shock protein 70 family.;\N;Similarity:Belongs to the heat shock protein 70 family.;Similarity:Belongs to the heat shock protein 70 family.;Similarity:Belongs to the heat shock protein 70 family.	;hspa5;;;;;	;heat shock protein 5 ;endoplasmic reticulum chaperone BiP-like ;;;;endoplasmic reticulum chaperone BiP-like	1	7	no	0	0	0	0	0	0	0	0	0	0
EOG090C02DS	ENSGACG00000005668	DDHD domain containing 1b	ENSONIG00000001652	DDHD domain containing 1b	ddhd1b	DDHD domain containing 1b	1	1	no	0	0	0	0	0	0	0	0	0	0
EOG090C0BUR	ENSGACG00000009829	chloride channel CLIC-like 1	ENSONIG00000001653	Transmembrane:Helical			1	1	no	0	0	0	0	0	0	0	0	0	0
EOG090C05MO	ENSGACG00000009841	FtsJ homolog 3 (E. coli)	ENSONIG00000001654	2'-O-ribose RNA methyltransferase SPB1 homolog	ftsj3	FtsJ RNA methyltransferase homolog 3	1	1	no	0	0	0	0	0	0	0	0	0	0
EOG090C0BY6	ENSGACG00000005681	cell growth regulator with ring finger domain 1	ENSONIG00000001655	Transmembrane:Helical	cgrrf1	cell growth regulator with ring finger domain 1	1	1	no	0	0	0	0	0	0	0	0	0	0
EOG090C00PK	ENSGACG00000014614	amylo-alpha-1, 6-glucosidase, 4-alpha-glucanotransferase a	ENSONIG00000001656	amylo-alpha-1, 6-glucosidase, 4-alpha-glucanotransferase a	agla	amylo-alpha-1, 6-glucosidase, 4-alpha-glucanotransferase a	1	1	no	0	0	0	0	0	0	0	0	0	0
EOG090C08J5	ENSGACG00000005694	proteasome (prosome, macropain) 26S subunit, ATPase, 6	ENSONIG00000001657	Similarity:Belongs to the AAA ATPase family.	psmc6	proteasome 26S subunit, ATPase 6	1	1	no	0	0	0	0	0	0	0	0	0	0
EOG090C0E8U	ENSGACG00000009850	HRAS-like suppressor	ENSONIG00000001658	Transmembrane:Helical	hrasls	phospholipid-metabolizing enzyme A-C1-like	1	1	no	0	0	0	0	0	0	0	0	0	0
EOG090C03Q0	ENSGACG00000009857	mitofusin 1b	ENSONIG00000001659	Similarity:Contains dynamin-type G (guanine nucleotide-binding) domain.	mfn1b	mitofusin 1	1	1	no	0	0	0	0	0	0	0	0	0	0
EOG090C02UM	ENSGACG00000014610	si:ch211-267e7.3	ENSONIG00000001660	si:ch211-267e7.3			1	1	no	0	0	0	0	0	0	0	0	0	0
EOG090C0BKU	ENSGACG00000004010	NUS1 dehydrodolichyl diphosphate synthase subunit	ENSONIG00000001661	NUS1 dehydrodolichyl diphosphate synthase subunit	nus1	NUS1, dehydrodolichyl diphosphate synthase subunit	1	1	no	0	0	0	0	0	0	0	0	0	0
EOG090C04J6	ENSGACG00000013130	LAS1-like, ribosome biogenesis factor	ENSONIG00000001662;ENSONIG00000021109	LAS1-like, ribosome biogenesis factor ;LAS1-like, ribosome biogenesis factor	;	;	1	2	yes	0	1	0	0	0	0	0	0	0	0
EOG090C018P	ENSGACG00000005642	RAD54-like 2 (S. cerevisiae)	ENSONIG00000001663	RAD54-like 2 (S. cerevisiae)			1	1	no	0	0	0	0	0	0	0	0	0	0
EOG090C0900	ENSGACG00000004017	solute carrier family 35, member F1	ENSONIG00000001664	Transmembrane:Helical	slc35f1	solute carrier family 35 member F1	1	1	no	0	0	0	0	0	0	0	0	0	0
EOG090C06Q2	ENSGACG00000004029	serine incorporator 1	ENSONIG00000001666	Transmembrane:Helical	serinc1	serine incorporator 1	1	1	no	0	0	0	0	0	0	0	0	0	0
EOG090C0AC5	ENSGACG00000009943	\N	ENSONIG00000001667	Active Site:Proton acceptor	zmp:0000001048	zmp:0000001048	1	1	no	0	0	0	0	0	0	0	0	0	0
EOG090C09E9	ENSGACG00000014602	ring finger protein 2	ENSONIG00000001668	ring finger protein 2	rnf2	ring finger protein 2	1	1	no	0	0	0	0	0	0	0	0	0	0
EOG090C0BD6	ENSGACG00000005656	transmembrane protein 115	ENSONIG00000001669	Transmembrane:Helical	tmem115	transmembrane protein 115	1	1	no	0	0	0	0	0	0	0	0	0	0
EOG090C0DK5	ENSGACG00000005670	ras homolog gene family, member Ab	ENSONIG00000001670;ENSONIG00000018884	Similarity:Belongs to the small GTPase superfamily. Rho family.;ras homolog gene family, member Ab	;rhoab	rho-related GTP-binding protein RhoA-B ;rho-related GTP-binding protein RhoA-B	1	2	no	0	0	0	0	0	0	0	0	0	0
EOG090C09GO	ENSGACG00000009890	guanine nucleotide binding protein (G protein), beta polypeptide 4	ENSONIG00000001671	guanine nucleotide binding protein (G protein), beta polypeptide 4	gnb4b	G protein subunit beta 4	1	1	no	0	0	0	0	0	0	0	0	0	0
EOG090C05ZP	ENSGACG00000004835	BTB (POZ) domain containing 6b	ENSONIG00000001672	Similarity:Contains 1 BTB (POZ) domain.	BTBD6	BTB/POZ domain-containing protein 6-B	1	1	no	0	0	0	0	0	0	0	0	0	0
EOG090C0F6K	ENSGACG00000009946	heme-binding protein soul5	ENSONIG00000001673	heme-binding protein soul5	soul5	heme-binding protein soul5	1	1	no	0	0	0	0	0	0	0	0	0	0
EOG090C02WO	ENSGACG00000005697	sema domain, immunoglobulin domain (Ig), short basic domain, secreted, (semaphorin) 3H	ENSONIG00000001675	Similarity:Contains Sema domain.	sema3h	semaphorin-3ab	1	1	no	0	0	0	0	0	0	0	0	0	0
EOG090C00RX	ENSGACG00000007522	jagged 2b	ENSONIG00000001676;ENSONIG00000005636	Delta-like protein;Delta-like protein	;jag2b	protein jagged-2 ;protein jagged-2	1	2	no	0	0	0	0	0	0	0	0	0	0
EOG090C05UI	ENSGACG00000004065	heat shock transcription factor 2	ENSONIG00000001677	Similarity:Belongs to the HSF family.	hsf2	heat shock transcription factor 2	1	1	no	0	0	0	0	0	0	0	0	0	0
EOG090C06V3	ENSGACG00000009940	actin-like 6A	ENSONIG00000001678	Similarity:Belongs to the actin family.	actl6a	actin like 6A	1	1	no	0	0	0	0	0	0	0	0	0	0
EOG090C05LD	ENSGACG00000005713	si:dkey-72l14.3	ENSONIG00000001679	Hyaluronoglucosaminidase	si:dkey-72l14.3	hyaluronidase-1	1	1	yes	0	0	0	0	0	0	0	0	1	0
EOG090C007W	ENSGACG00000013754	\N	ENSONIG00000001680;ENSONIG00000016938	Uncharacterized protein ;Uncharacterized protein	;	;	1	2	no	0	0	0	0	0	0	0	0	0	0
EOG090C017U	ENSGACG00000005828	minichromosome maintenance complex component 9	ENSONIG00000001681	Similarity:Belongs to the MCM family.	mcm9	minichromosome maintenance 9 homologous recombination repair factor	1	1	no	0	0	0	0	0	0	0	0	0	0
EOG090C06H2	ENSGACG00000012412	arylsulfatase A	ENSONIG00000001682;ENSONIG00000014879	Uncharacterized protein ;arylsulfatase A	;arsa	;arylsulfatase A	1	2	no	0	0	0	0	0	0	0	0	0	0
EOG090C0BQZ	ENSGACG00000009992	mitochondrial ribosomal protein L47	ENSONIG00000001683	mitochondrial ribosomal protein L47	mrpl47	mitochondrial ribosomal protein L47	1	1	no	0	0	0	0	0	0	0	0	0	0
EOG090C03LH	ENSGACG00000005719	xeroderma pigmentosum, complementation group C	ENSONIG00000001685	xeroderma pigmentosum, complementation group C	xpc	XPC complex subunit, DNA damage recognition and repair factor	1	1	no	0	0	0	0	0	0	0	0	0	0
EOG090C0662	ENSGACG00000009952	nuclear receptor subfamily 5, group A, member 5	ENSONIG00000001686	Similarity:Belongs to the nuclear hormone receptor family.	nr5a5	nuclear receptor subfamily 5 group A member 2	1	1	no	0	0	0	0	0	0	0	0	0	0
EOG090C0DUP	ENSGACG00000009997	NADH dehydrogenase (ubiquinone) 1 beta subcomplex 5	ENSONIG00000001687	Transmembrane:Helical	ndufb5	NADH:ubiquinone oxidoreductase subunit B5	1	1	no	0	0	0	0	0	0	0	0	0	0
EOG090C083Q	ENSGACG00000005799	golgi-associated PDZ and coiled-coil motif containing	ENSONIG00000001688	Similarity:Contains 1 PDZ (DHR) domain.	gopc	golgi associated PDZ and coiled-coil motif containing	1	1	no	0	0	0	0	0	0	0	0	0	0
EOG090C0CFK	ENSGACG00000012188	ubiquitin-conjugating enzyme E2, J1	ENSONIG00000001689	Transmembrane:Helical	ube2j1	ubiquitin conjugating enzyme E2 J1	1	1	no	0	0	0	0	0	0	0	0	0	0
EOG090C00X5	ENSGACG00000009967	calmodulin regulated spectrin-associated protein family, member 3	ENSONIG00000001690	calmodulin regulated spectrin-associated protein family, member 3	camsap3	calmodulin regulated spectrin-associated protein family, member 3	1	1	no	0	0	0	0	0	0	0	0	0	0
EOG090C06MK	ENSGACG00000012185;ENSGACG00000013033	gamma-aminobutyric acid (GABA) A receptor, rho 2 ;gamma-aminobutyric acid (GABA) A receptor, rho 2b	ENSONIG00000001691;ENSONIG00000009052	Similarity:Belongs to the ligand-gated ion channel (TC 1.A.9) family.;Similarity:Belongs to the ligand-gated ion channel (TC 1.A.9) family.	gabrr2b;	gamma-aminobutyric acid (GABA) A receptor, rho 2b ;gamma-aminobutyric acid receptor subunit rho-2	2	2	no	0	0	0	0	0	0	0	0	0	0
EOG090C020Q	ENSGACG00000010015	ubiquitin specific peptidase 13 (isopeptidase T-3)	ENSONIG00000001692	Ubiquitinyl hydrolase 1	usp13	ubiquitin specific peptidase 13	1	1	no	0	0	0	0	0	0	0	0	0	0
EOG090C06C3	ENSGACG00000005727	ariadne homolog 2 (Drosophila)	ENSONIG00000001693	ariadne homolog 2 (Drosophila)	arih2	ariadne homolog 2 (Drosophila)	1	1	no	0	0	0	0	0	0	0	0	0	0
EOG090C048R	ENSGACG00000001005	RecQ protein-like (DNA helicase Q1-like)	ENSONIG00000001694	RecQ protein-like (DNA helicase Q1-like)	recql	RecQ helicase-like	1	1	no	0	0	0	0	0	0	0	0	0	0
EOG090C02D5	ENSGACG00000009978	XPA binding protein 2	ENSONIG00000001695	XPA binding protein 2	xab2	XPA binding protein 2	1	1	no	0	0	0	0	0	0	0	0	0	0
EOG090C053B	ENSGACG00000005730	IMP (inosine 5'-monophosphate) dehydrogenase 2	ENSONIG00000001696	Inosine-5'-monophosphate dehydrogenase	impdh2	inosine monophosphate dehydrogenase 2	1	1	no	0	0	0	0	0	0	0	0	0	0
EOG090C0FYC	ENSGACG00000004333	golgi transport 1Ba	ENSONIG00000001697	Transmembrane:Helical	GOLT1B (1 of many)	vesicle transport protein GOT1B	1	1	no	0	0	0	0	0	0	0	0	0	0
EOG090C058H	ENSGACG00000005745	DALR anticodon binding domain containing 3	ENSONIG00000001699	DALR anticodon binding domain containing 3	dalrd3	DALR anticodon binding domain containing 3	1	1	no	0	0	0	0	0	0	0	0	0	0
EOG090C0434	ENSGACG00000010027	peroxisomal biogenesis factor 5-like a	ENSONIG00000001700	peroxisomal biogenesis factor 5-like a	pex5la	peroxisomal biogenesis factor 5-like a	1	1	no	0	0	0	0	0	0	0	0	0	0
EOG090C002A	ENSGACG00000005753	cadherin, EGF LAG seven-pass G-type receptor 3	ENSONIG00000001701	Similarity:Contains GPS domain.	celsr3	cadherin, EGF LAG seven-pass G-type receptor 3	1	1	yes	0	0	0	0	0	0	0	0	1	0
EOG090C01AK	ENSGACG00000020265	active BCR-related	ENSONIG00000001703	Similarity:Contains 1 C2 domain.	abr	ABR, RhoGEF and GTPase activating protein	1	1	no	0	0	0	0	0	0	0	0	0	0
EOG090C09JJ	ENSGACG00000001041;ENSGACG00000004329	lactate dehydrogenase Ba ;lactate dehydrogenase Bb	ENSONIG00000001705;ENSONIG00000008643	L-lactate dehydrogenase;L-lactate dehydrogenase	ldhba;ldhbb	L-lactate dehydrogenase B chain ;L-lactate dehydrogenase C chain	2	2	no	0	0	0	0	0	0	0	0	0	0
EOG090C0913	ENSGACG00000010040	coiled-coil domain containing 50	ENSONIG00000001708	coiled-coil domain containing 50	ccdc50	coiled-coil domain containing 50	1	1	no	0	0	0	0	0	0	0	0	0	0
EOG090C096W	ENSGACG00000001109	solute carrier family 25 (mitochondrial carrier	ENSONIG00000001712	Similarity:Belongs to the mitochondrial carrier (TC 2.A.29) family.	slc25a3a	solute carrier family 25 member 3	1	1	no	0	0	0	0	0	0	0	0	0	0
EOG090C0A3H	ENSGACG00000020266	aspartoacylase	ENSONIG00000001713	Region:Substrate binding	aspa	aspartoacylase	1	1	yes	0	0	0	0	0	0	0	0	1	0
EOG090C03F9	ENSGACG00000010066	prolyl 3-hydroxylase 2	ENSONIG00000001714	prolyl 3-hydroxylase 2	p3h2	prolyl 3-hydroxylase 2	1	1	no	0	0	0	0	0	0	0	0	0	0
EOG090C09XF	ENSGACG00000020269	chromosome 11 open reading frame 54	ENSONIG00000001715	chromosome 11 open reading frame 54	zgc:85789	linkage group 10 C11orf54 homolog	1	1	no	0	0	0	0	0	0	0	0	0	0
EOG090C02C6	ENSGACG00000005768	WD repeat domain 6	ENSONIG00000001716	WD repeat domain 6	wdr6	WD repeat domain 6	1	1	no	0	0	0	0	0	0	0	0	0	0
EOG090C049F	ENSGACG00000020270	A kinase (PRKA) anchor protein 10	ENSONIG00000001717	Similarity:Contains 2 RGS domains.	akap10	A-kinase anchoring protein 10	1	1	no	0	0	0	0	0	0	0	0	0	0
EOG090C04KA	ENSGACG00000005775	solute carrier family 26, member 6	ENSONIG00000001718	Similarity:Belongs to the SLC26A/SulP transporter (TC 2.A.53) family.	slc26a6	solute carrier family 26 member 6	1	1	no	0	0	0	0	0	0	0	0	0	0
EOG090C06OT	ENSGACG00000007644;ENSGACG00000013067	adenylate kinase 7a ;adenylate kinase 7b	ENSONIG00000001719;ENSONIG00000005672	adenylate kinase 7b ;adenylate kinase 7a	;ak7a	;adenylate kinase 7	2	2	no	0	0	0	0	0	0	0	0	0	0
EOG090C088U	ENSGACG00000010075	coiled-coil domain containing 181	ENSONIG00000001720	coiled-coil domain containing 181	ccdc181	coiled-coil domain containing 181	1	1	no	0	0	0	0	0	0	0	0	0	0
EOG090C07C3	ENSGACG00000010082	coproporphyrinogen oxidase	ENSONIG00000001721	Transmembrane:Helical	cpox	coproporphyrinogen oxidase	1	1	no	0	0	0	0	0	0	0	0	0	0
EOG090C000J	ENSGACG00000000520;ENSGACG00000007463;ENSGACG00000007483	spectrin repeat containing, nuclear envelope 2a ;spectrin, beta, non-erythrocytic 5 ;spectrin repeat containing, nuclear envelope 2	ENSONIG00000001722;ENSONIG00000005623	Transmembrane:Helical;spectrin repeat containing, nuclear envelope 2	;	;	3	2	no	0	0	0	0	0	0	0	0	0	0
EOG090C0EUD	ENSGACG00000010095	proline rich Gla (G-carboxyglutamic acid) 1	ENSONIG00000001724	Similarity:Contains Gla (gamma-carboxy-glutamate) domain.	prrg1	proline rich Gla (G-carboxyglutamic acid) 1	1	1	no	0	0	0	0	0	0	0	0	0	0
EOG090C05NW	ENSGACG00000020272	stress-induced phosphoprotein 1	ENSONIG00000001725	stress-induced phosphoprotein 1	stip1	stress-induced phosphoprotein 1	1	1	no	0	0	0	0	0	0	0	0	0	0
EOG090C0ECP	ENSGACG00000010104;ENSGACG00000015180	transmembrane protein 47 ;transmembrane protein 47	ENSONIG00000001726;ENSONIG00000019927	Transmembrane:Helical;Transmembrane:Helical	TMEM47;	transmembrane protein 47 ;transmembrane protein 47-like	2	2	no	0	0	0	0	0	0	0	0	0	0
EOG090C0ARB	ENSGACG00000004172	zgc:109986	ENSONIG00000001727	zgc:109986	zgc:109986	zgc:109986	1	1	no	0	0	0	0	0	0	0	0	0	0
EOG090C087I	ENSGACG00000010107	TGF-beta activated kinase 1/MAP3K7 binding protein 3	ENSONIG00000001728	TGF-beta activated kinase 1/MAP3K7 binding protein 3	tab3	TGF-beta activated kinase 1 (MAP3K7) binding protein 3	1	1	no	0	0	0	0	0	0	0	0	0	0
EOG090C058V	ENSGACG00000012841	solute carrier family 3 (amino acid transporter heavy chain), member 2b	ENSONIG00000001729	Transmembrane:Helical	slc3a2b	solute carrier family 3 (amino acid transporter heavy chain), member 2b	1	1	no	0	0	0	0	0	0	0	0	0	0
EOG090C063S	ENSGACG00000010119	nexilin (F actin binding protein)	ENSONIG00000001730	nexilin (F actin binding protein)	nexn	nexilin (F actin binding protein)	1	1	yes	0	0	0	0	0	1	0	0	0	0
EOG090C037L	ENSGACG00000020273	ribosomal protein S6 kinase, polypeptide 4	ENSONIG00000001731	Ribosomal protein S6 kinase	rps6ka4	ribosomal protein S6 kinase, polypeptide 4	1	1	no	0	0	0	0	0	0	0	0	0	0
EOG090C0654	ENSGACG00000010129	family with sequence similarity 188, member B	ENSONIG00000001734	family with sequence similarity 188, member B	si:dkey-30h22.11	MINDY lysine 48 deubiquitinase 4	1	1	no	0	0	0	0	0	0	0	0	0	0
EOG090C09KK	ENSGACG00000020275	zinc finger protein-like 1	ENSONIG00000001738	Transmembrane:Helical	zfpl1	zinc finger protein like 1	1	1	no	0	0	0	0	0	0	0	0	0	0
EOG090C03HR	ENSGACG00000010143	IQ motif containing with AAA domain 1 like	ENSONIG00000001741	IQ motif containing with AAA domain 1 like	zgc:153738	dynein regulatory complex protein 11	1	1	no	0	0	0	0	0	0	0	0	0	0
EOG090C08WR	ENSGACG00000020277	retinal outer segment membrane protein 1a	ENSONIG00000001742	Transmembrane:Helical	rom1a	peripherin-2	1	1	yes	0	0	0	0	0	1	1	0	1	0
EOG090C0BJ6	ENSGACG00000003868	dehydrogenase/reductase (SDR family) member 13	ENSONIG00000001743	Similarity:Belongs to the short-chain dehydrogenases/reductases (SDR) family.	dhrs13a.2	dehydrogenase/reductase SDR family member 13	1	1	no	0	0	0	0	0	0	0	0	0	0
EOG090C06DD	ENSGACG00000020278	FERM domain containing 8	ENSONIG00000001744	FERM domain containing 8	frmd8	FERM domain containing 8	1	1	no	0	0	0	0	0	0	0	0	0	0
EOG090C0009	ENSGACG00000010162;ENSGACG00000010184	\N;obscurin, cytoskeletal calmodulin and titin-interacting RhoGEF a	ENSONIG00000001745;ENSONIG00000001747	Uncharacterized protein ;obscurin, cytoskeletal calmodulin and titin-interacting RhoGEF a	;obscna	;obscurin, cytoskeletal calmodulin and titin-interacting RhoGEF a	2	2	no	0	0	0	0	0	0	0	0	0	0
EOG090C0EUV	ENSGACG00000019802	glycoprotein hormone beta 5	ENSONIG00000001746;ENSONIG00000013530	glycoprotein hormone beta 5 ;Uncharacterized protein	gphb5;si:dkey-23i12.9	glycoprotein hormone beta 5 ;glycoprotein hormone beta-5	1	2	no	0	0	0	0	0	0	0	0	0	0
EOG090C01T4	ENSGACG00000010336	potassium voltage-gated channel, subfamily H (eag-related), member 5a	ENSONIG00000001748;ENSONIG00000013580	Similarity:Contains cyclic nucleotide-binding domain.;Similarity:Contains cyclic nucleotide-binding domain.	;	;	1	2	no	0	0	0	0	0	0	0	0	0	0
EOG090C03PH	ENSGACG00000001062	\N	ENSONIG00000001749	PI3K p85 subunit		phosphatidylinositol 3-kinase regulatory subunit alpha	1	1	no	0	0	0	0	0	0	0	0	0	0
EOG090C0CU3	ENSGACG00000010211;ENSGACG00000017446	guanylate kinase 1b ;guanylate kinase 1a	ENSONIG00000001750;ENSONIG00000009487	guanylate kinase 1b ;guanylate kinase 1a	guk1b;guk1a	guanylate kinase ;guanylate kinase 1	2	2	yes	0	0	0	0	0	1	1	0	1	0
EOG090C0349	ENSGACG00000020279	vacuolar protein sorting 51 homolog (S. cerevisiae)	ENSONIG00000001751	vacuolar protein sorting 51 homolog (S. cerevisiae)	vps51	VPS51, GARP complex subunit	1	1	no	0	0	0	0	0	0	0	0	0	0
EOG090C0748	ENSGACG00000010860	protein phosphatase 2, regulatory subunit B', epsilon isoform a	ENSONIG00000001752	protein phosphatase 2, regulatory subunit B', epsilon isoform a	ppp2r5eb	protein phosphatase 2 regulatory subunit B'epsilon	1	1	no	0	0	0	0	0	0	0	0	0	0
EOG090C06JJ	ENSGACG00000010240	ring finger protein 220b	ENSONIG00000001753	ring finger protein 220b	rnf220b	ring finger protein 220b	1	1	no	0	0	0	0	0	0	0	0	0	0
EOG090C07LQ	ENSGACG00000020280	transmembrane 7 superfamily member 2	ENSONIG00000001754	Transmembrane:Helical	tm7sf2	transmembrane 7 superfamily member 2	1	1	no	0	0	0	0	0	0	0	0	0	0
EOG090C0EV7	ENSGACG00000020281	cornichon family AMPA receptor auxiliary protein 2	ENSONIG00000001755	Transmembrane:Helical	cnih2	cornichon family AMPA receptor auxiliary protein 2	1	1	yes	0	1	0	0	0	0	0	0	0	0
EOG090C07OX	ENSGACG00000010250	DNA methyltransferase 1 associated protein 1	ENSONIG00000001756	DNA methyltransferase 1 associated protein 1	dmap1	DNA methyltransferase 1 associated protein 1	1	1	no	0	0	0	0	0	0	0	0	0	0
EOG090C02CL	ENSGACG00000019764;ENSGACG00000020282	solute carrier family 8 (sodium/calcium exchanger), member 4b ;solute carrier family 8 (sodium/calcium exchanger), member 4a	ENSONIG00000001757;ENSONIG00000013515	Transmembrane:Helical;Transmembrane:Helical	slc8a4a;slc8a4b	solute carrier family 8 (sodium/calcium exchanger), member 4a ;sodium/calcium exchanger 1	2	2	yes	0	0	0	0	0	1	0	0	0	0
EOG090C06ED	ENSGACG00000010265	heterogeneous nuclear ribonucleoprotein M	ENSONIG00000001758	heterogeneous nuclear ribonucleoprotein M	hnrnpm	heterogeneous nuclear ribonucleoprotein M	1	1	no	0	0	0	0	0	0	0	0	0	0
EOG090C0ACR	ENSGACG00000005782	monoglyceride lipase	ENSONIG00000001759	monoglyceride lipase	mgll	monoglyceride lipase	1	1	no	0	0	0	0	0	0	0	0	0	0
EOG090C08DR	ENSGACG00000005792	protein kinase, cAMP-dependent, regulatory, type II, alpha A	ENSONIG00000001760	protein kinase, cAMP-dependent, regulatory, type II, alpha A	prkar2aa	cAMP-dependent protein kinase type II-alpha regulatory subunit	1	1	no	0	0	0	0	0	0	0	0	0	0
EOG090C09X4	ENSGACG00000001066	\N	ENSONIG00000001761	Serine/threonine-protein phosphatase		serine/threonine-protein phosphatase 2A catalytic subunit beta isoform	1	1	no	0	0	0	0	0	0	0	0	0	0
EOG090C02S2	ENSGACG00000020283	si:dkey-175m17.7	ENSONIG00000001762	Similarity:Contains tyrosine-protein phosphatase domain.	si:dkey-175m17.7	si:dkey-175m17.7	1	1	no	0	0	0	0	0	0	0	0	0	0
EOG090C06FW	ENSGACG00000010855	sphingosine-1-phosphate phosphatase 1	ENSONIG00000001763	Transmembrane:Helical	sgpp1	sphingosine-1-phosphate phosphatase 1	1	1	no	0	0	0	0	0	0	0	0	0	0
EOG090C05VC	ENSGACG00000010852	synaptotagmin XVI	ENSONIG00000001764	Similarity:Contains 2 C2 domains.	SYT16	synaptotagmin 16	1	1	no	0	0	0	0	0	0	0	0	0	0
EOG090C09O1	ENSGACG00000010844	small nuclear RNA activating complex, polypeptide 1b	ENSONIG00000001765	small nuclear RNA activating complex, polypeptide 1b	snapc1b	small nuclear RNA activating complex polypeptide 1	1	1	no	0	0	0	0	0	0	0	0	0	0
EOG090C0GLG	ENSGACG00000020284	guanine nucleotide binding protein (G protein), gamma 3	ENSONIG00000001766	Guanine nucleotide-binding protein subunit gamma	gng3	G protein subunit gamma 3	1	1	no	0	0	0	0	0	0	0	0	0	0
EOG090C0FIO	ENSGACG00000020285	barrier to autointegration factor 1	ENSONIG00000001767	barrier to autointegration factor 1	banf1	barrier to autointegration factor 1	1	1	no	0	0	0	0	0	0	0	0	0	0
EOG090C0DZ5	ENSGACG00000020286	peroxiredoxin 5	ENSONIG00000001768	peroxiredoxin 5	prdx5	peroxiredoxin 5	1	1	no	0	0	0	0	0	0	0	0	0	0
EOG090C0BYW	ENSGACG00000005802	N-acetyltransferase 6 (GCN5-related)	ENSONIG00000001769	N-acetyltransferase 6 (GCN5-related)	naa80	N(alpha)-acetyltransferase 80, NatH catalytic subunit	1	1	no	0	0	0	0	0	0	0	0	0	0
EOG090C07K9	ENSGACG00000005796	hyaluronoglucosaminidase 3	ENSONIG00000001771	Hyaluronoglucosaminidase	hyal3	hyaluronidase 3	1	1	no	0	0	0	0	0	0	0	0	0	0
EOG090C075C	ENSGACG00000010289;ENSGACG00000015487	translocase of inner mitochondrial membrane 44 homolog (yeast) ;translocase of inner mitochondrial membrane 44 homolog (yeast)	ENSONIG00000001772;ENSONIG00000010437	Mitochondrial import inner membrane translocase subunit TIM44;Mitochondrial import inner membrane translocase subunit TIM44	timm44;TIMM44	translocase of inner mitochondrial membrane 44 homolog (yeast) ;mitochondrial import inner membrane translocase subunit TIM44	2	2	no	0	0	0	0	0	0	0	0	0	0
EOG090C0E37	ENSGACG00000010841	Yip1 domain family, member 6	ENSONIG00000001773	Protein YIPF	yipf6	Yip1 domain family member 6	1	1	no	0	0	0	0	0	0	0	0	0	0
EOG090C0FA6	ENSGACG00000002249	D-tyrosyl-tRNA deacylase 2	ENSONIG00000001776	D-tyrosyl-tRNA deacylase 2	dtd2	D-tyrosyl-tRNA deacylase 2 (putative)	1	1	no	0	0	0	0	0	0	0	0	0	0
EOG090C002W	ENSGACG00000010321	fibrillin 2b	ENSONIG00000001777	fibrillin 2b	fbn2b	fibrillin-2	1	1	no	0	0	0	0	0	0	0	0	0	0
EOG090C08HE	ENSGACG00000020287	estrogen-related receptor alpha	ENSONIG00000001778	Similarity:Belongs to the nuclear hormone receptor family.	esrra	estrogen related receptor alpha	1	1	no	0	0	0	0	0	0	0	0	0	0
EOG090C0BLP	ENSGACG00000002245;ENSGACG00000010813	nucleotide binding protein-like ;nucleotide binding protein-like	ENSONIG00000001779	nucleotide binding protein-like	nubpl	nucleotide binding protein like	2	1	no	0	0	0	0	0	0	0	0	0	0
EOG090C0E18	ENSGACG00000017636;ENSGACG00000019430	claudin domain containing 1b ;claudin domain containing 1a	ENSONIG00000001780;ENSONIG00000017576	Transmembrane:Helical;Transmembrane:Helical	cldnd1a;cldnd1b	claudin domain-containing protein 1 ;claudin domain-containing protein 1	2	2	no	0	0	0	0	0	0	0	0	0	0
EOG090C092T	ENSGACG00000005808	aminomethyltransferase	ENSONIG00000001781	Aminomethyltransferase	amt	aminomethyltransferase	1	1	no	0	0	0	0	0	0	0	0	0	0
EOG090C0B60	ENSGACG00000017646	aspartoacylase (aminocyclase) 3, tandem duplicate 2	ENSONIG00000001782;ENSONIG00000017577	aminoacylase 3 ;aspartoacylase (aminocyclase) 3, tandem duplicate 2	;acy3.2	N-acyl-aromatic-L-amino acid amidohydrolase (carboxylate-forming) B ;N-acyl-aromatic-L-amino acid amidohydrolase (carboxylate-forming) B	1	2	no	0	0	0	0	0	0	0	0	0	0
EOG090C02QQ	ENSGACG00000016955	oxysterol binding protein	ENSONIG00000001784;ENSONIG00000010146	Oxysterol-binding protein;Oxysterol-binding protein	osbp;OSBP	oxysterol-binding protein 1 ;oxysterol-binding protein 1	1	2	no	0	0	0	0	0	0	0	0	0	0
EOG090C00UV	ENSGACG00000010805	Rho GTPase activating protein 5	ENSONIG00000001785	Rho GTPase activating protein 5	arhgap5	Rho GTPase activating protein 5	1	1	no	0	0	0	0	0	0	0	0	0	0
EOG090C088E	ENSGACG00000005812	interferon-related developmental regulator 2	ENSONIG00000001786	interferon-related developmental regulator 2	ifrd2	interferon-related developmental regulator 2	1	1	no	0	0	0	0	0	0	0	0	0	0
EOG090C0773	ENSGACG00000020288	adenylosuccinate synthase, like	ENSONIG00000001787	Adenylosuccinate synthetase	adssl	adenylosuccinate synthase, like	1	1	no	0	0	0	0	0	0	0	0	0	0
EOG090C0379	ENSGACG00000005838	zgc:136971	ENSONIG00000001788	zgc:136971	zgc:136971	zgc:136971	1	1	no	0	0	0	0	0	0	0	0	0	0
EOG090C063I	ENSGACG00000019429	coronin, actin binding protein, 1B	ENSONIG00000001790	Coronin	coro1b	coronin-1B	1	1	no	0	0	0	0	0	0	0	0	0	0
EOG090C01SH	ENSGACG00000020289	kinesin family member 4	ENSONIG00000001791	Kinesin-like protein	kif4	kinesin family member 4A	1	1	no	0	0	0	0	0	0	0	0	0	0
EOG090C02NU	ENSGACG00000005848	sema domain, immunoglobulin domain (Ig), short basic domain, secreted, (semaphorin) 3B	ENSONIG00000001792	Similarity:Contains Sema domain.	sema3b	semaphorin 3B	1	1	no	0	0	0	0	0	0	0	0	0	0
EOG090C043Y	ENSGACG00000016328;ENSGACG00000019427	deltex 4, E3 ubiquitin ligase ;deltex 4, E3 ubiquitin ligase	ENSONIG00000001793;ENSONIG00000008963	deltex 4, E3 ubiquitin ligase ;deltex 4, E3 ubiquitin ligase	si:ch211-119e14.2;	;	2	2	no	0	0	0	0	0	0	0	0	0	0
EOG090C0EJZ	ENSGACG00000019426	Myb/SANT-like DNA-binding domain containing 1	ENSONIG00000001794	Myb/SANT-like DNA-binding domain containing 1	msantd1	Myb/SANT DNA binding domain containing 1	1	1	no	0	0	0	0	0	0	0	0	0	0
EOG090C08M0	ENSGACG00000010353;ENSGACG00000015496	ceramide synthase 4a ;ceramide synthase 4b	ENSONIG00000001795;ENSONIG00000010441	Similarity:Contains TLC (TRAM/LAG1/CLN8) domain.;Similarity:Contains TLC (TRAM/LAG1/CLN8) domain.	cers4a;cers4b	ceramide synthase 2 ;ceramide synthase 2	2	2	no	0	0	0	0	0	0	0	0	0	0
EOG090C00XN	ENSGACG00000019425	regulator of G-protein signaling 12a	ENSONIG00000001796	Similarity:Contains 1 PDZ (DHR) domain.	rgs12a	regulator of G protein signaling 12a	1	1	no	0	0	0	0	0	0	0	0	0	0
EOG090C03JI	ENSGACG00000019423	HGF activator	ENSONIG00000001797	Similarity:Belongs to the peptidase S1 family.	HGFAC	HGF activator	1	1	no	0	0	0	0	0	0	0	0	0	0
EOG090C0BDA	ENSGACG00000020290	Alport syndrome, mental retardation, midface hypoplasia and elliptocytosis chromosomal region gene 1 homolog (human)	ENSONIG00000001798	Alport syndrome, mental retardation, midface hypoplasia and elliptocytosis chromosomal region gene 1 homolog (human)	ammecr1	Alport syndrome, mental retardation, midface hypoplasia and elliptocytosis chromosomal region gene 1 homolog (human)	1	1	no	0	0	0	0	0	0	0	0	0	0
EOG090C0G35	ENSGACG00000010390	LSM7 homolog, U6 small nuclear RNA and mRNA degradation associated	ENSONIG00000001801	LSM7 homolog, U6 small nuclear RNA and mRNA degradation associated	lsm7	LSM7 homolog, U6 small nuclear RNA and mRNA degradation associated	1	1	no	0	0	0	0	0	0	0	0	0	0
EOG090C0ASO	ENSGACG00000020291	transmembrane protein 164	ENSONIG00000001802	Transmembrane:Helical	TMEM164	transmembrane protein 164	1	1	no	0	0	0	0	0	0	0	0	0	0
EOG090C02LQ	ENSGACG00000010394	\N	ENSONIG00000001803;ENSONIG00000001805	Similarity:Belongs to the peptidase S1 family.;Similarity:Belongs to the peptidase S1 family.	tmprss9;	transmembrane serine protease 9 ;	1	2	no	0	0	0	0	0	0	0	0	0	0
EOG090C063W	ENSGACG00000020292	gamma-aminobutyric acid (GABA) A receptor, alpha 3	ENSONIG00000001804	Similarity:Belongs to the ligand-gated ion channel (TC 1.A.9) family.	gabra3	gamma-aminobutyric acid (GABA) A receptor, alpha 3	1	1	no	0	0	0	0	0	0	0	0	0	0
EOG090C0GIL	ENSGACG00000010398	translocase of inner mitochondrial membrane 13 homolog (yeast)	ENSONIG00000001806	translocase of inner mitochondrial membrane 13 homolog (yeast)	timm13	translocase of inner mitochondrial membrane 13	1	1	no	0	0	0	0	0	0	0	0	0	0
EOG090C04FR	ENSGACG00000010425	ectodermal-neural cortex 3	ENSONIG00000001808	Similarity:Contains 1 BTB (POZ) domain.	enc3	ectoderm-neural cortex protein 1	1	1	no	0	0	0	0	0	0	0	0	0	0
EOG090C0BYD	ENSGACG00000015699	e2f-associated phosphoprotein	ENSONIG00000001809	e2f-associated phosphoprotein	eapp	E2F associated phosphoprotein	1	1	no	0	0	0	0	0	0	0	0	0	0
EOG090C00QC	ENSGACG00000010468	rho/rac guanine nucleotide exchange factor (GEF) 18b	ENSONIG00000001810	Similarity:Contains DH (DBL-homology) domain.	arhgef18b	rho/rac guanine nucleotide exchange factor (GEF) 18b	1	1	no	0	0	0	0	0	0	0	0	0	0
EOG090C00QR	ENSGACG00000010475	insulin receptor b	ENSONIG00000001811	Tyrosine-protein kinase receptor	insrb	insulin receptor	1	1	yes	0	0	0	0	0	0	0	0	1	0
EOG090C02B2	ENSGACG00000019418	docking protein 7	ENSONIG00000001812	docking protein 7	DOK7	docking protein 7	1	1	no	0	0	0	0	0	0	0	0	0	0
EOG090C06KR	ENSGACG00000020293	gamma-aminobutyric acid (GABA) A receptor, beta 4	ENSONIG00000001813	Similarity:Belongs to the ligand-gated ion channel (TC 1.A.9) family.	gabrb4	gamma-aminobutyric acid receptor subunit beta-4	1	1	no	0	0	0	0	0	0	0	0	0	0
EOG090C0ANS	ENSGACG00000019416	\N	ENSONIG00000001816	Similarity:Contains homeobox DNA-binding domain.		homeobox protein HMX1	1	1	no	0	0	0	0	0	0	0	0	0	0
EOG090C0CAC	ENSGACG00000019415	H6 family homeobox 4	ENSONIG00000001817	Similarity:Contains homeobox DNA-binding domain.		homeobox protein HMX3-A	1	1	no	0	0	0	0	0	0	0	0	0	0
EOG090C038D	ENSGACG00000019414	carboxypeptidase Z	ENSONIG00000001818	Similarity:Contains FZ (frizzled) domain.	CPZ (1 of many)	carboxypeptidase Z	1	1	yes	0	0	0	0	0	0	0	1	1	0
EOG090C02OV	ENSGACG00000005862	sema domain, immunoglobulin domain (Ig), short basic domain, secreted, (semaphorin) 3bl	ENSONIG00000001819	Similarity:Contains Sema domain.	sema3bl	semaphorin 3G	1	1	no	0	0	0	0	0	0	0	0	0	0
EOG090C0AU0	ENSGACG00000020294	V-set and immunoglobulin domain containing 1	ENSONIG00000001820	Transmembrane:Helical			1	1	no	0	0	0	0	0	0	0	0	0	0
EOG090C0BB3	ENSGACG00000019411	G protein-coupled receptor 78	ENSONIG00000001821	Transmembrane:Helical	gpr78b	G-protein coupled receptor 26	1	1	no	0	0	0	0	0	0	0	0	0	0
EOG090C04MR	ENSGACG00000019409	tRNA methyltransferase 44 homolog (S. cerevisiae)	ENSONIG00000001822	tRNA methyltransferase 44 homolog (S. cerevisiae)	trmt44	tRNA methyltransferase 44 homolog	1	1	no	0	0	0	0	0	0	0	0	0	0
EOG090C08TX	ENSGACG00000020295	trimethyllysine hydroxylase, epsilon	ENSONIG00000001823	trimethyllysine hydroxylase, epsilon	tmlhe	trimethyllysine hydroxylase, epsilon	1	1	no	0	0	0	0	0	0	0	0	0	0
EOG090C03VI	ENSGACG00000019408	tyrosine kinase, non-receptor, 1	ENSONIG00000001824	Catalytic Activity:ATP + a	tnk1	tyrosine kinase non receptor 1	1	1	no	0	0	0	0	0	0	0	0	0	0
EOG090C072G	ENSGACG00000020296	membrane protein, palmitoylated 1	ENSONIG00000001825	Similarity:Contains 1 PDZ (DHR) domain.	mpp1	membrane palmitoylated protein 1	1	1	no	0	0	0	0	0	0	0	0	0	0
EOG090C0FAV	ENSGACG00000016383	nuclear assembly factor 1 homolog (S. cerevisiae)	ENSONIG00000001826	nuclear assembly factor 1 homolog (S. cerevisiae)			1	1	no	0	0	0	0	0	0	0	0	0	0
EOG090C09P7	ENSGACG00000019312;ENSGACG00000020298	procollagen C-endopeptidase enhancer b ;procollagen C-endopeptidase enhancer a	ENSONIG00000001827;ENSONIG00000009245	Similarity:Contains NTR domain.;Similarity:Contains NTR domain.	pcolcea;pcolceb	procollagen C-endopeptidase enhancer 2 ;procollagen C-endopeptidase enhancer b	2	2	no	0	0	0	0	0	0	0	0	0	0
EOG090C006B	ENSGACG00000001287	spectrin, beta, non-erythrocytic 5	ENSONIG00000001828	spectrin, beta, non-erythrocytic 5	sptbn5	spectrin, beta, non-erythrocytic 5	1	1	no	0	0	0	0	0	0	0	0	0	0
EOG090C0C4S	ENSGACG00000010489	unconventional SNARE in the ER 1 homolog (S. cerevisiae)	ENSONIG00000001829	Transmembrane:Helical	use1	unconventional SNARE in the ER 1	1	1	no	0	0	0	0	0	0	0	0	0	0
EOG090C00AH	ENSGACG00000010494	myosin IXB	ENSONIG00000001830	Similarity:Contains myosin motor domain.	si:zfos-588f8.1	myosin IXB	1	1	no	0	0	0	0	0	0	0	0	0	0
EOG090C04VE	ENSGACG00000010528	nicalin	ENSONIG00000001833	Transmembrane:Helical	ncln	nicalin	1	1	no	0	0	0	0	0	0	0	0	0	0
EOG090C0F3D	ENSGACG00000019919;ENSGACG00000020299	transmembrane protein 88 b ;transmembrane protein 88 a	ENSONIG00000001835;ENSONIG00000019917	Transmembrane:Helical;Transmembrane:Helical	tmem88a;tmem88b	transmembrane protein 88 ;transmembrane protein 88	2	2	no	0	0	0	0	0	0	0	0	0	0
EOG090C00JU	ENSGACG00000020325	lysine (K)-specific demethylase 6B, b	ENSONIG00000001837	Similarity:Contains JmjC domain.	kdm6bb	lysine (K)-specific demethylase 6B, b	1	1	yes	0	0	1	0	0	0	0	0	0	0
EOG090C0ACZ	ENSGACG00000003845;ENSGACG00000019927;ENSGACG00000020323	endonuclease domain containing 1 ;endonuclease domain containing 1 ;endonuclease domain containing 1	ENSONIG00000001842;ENSONIG00000008801;ENSONIG00000019901;ENSONIG00000019902	endonuclease domain containing 1 ;endonuclease domain containing 1 ;endonuclease domain containing 1 ;endonuclease domain containing 1	;;si:dkey-85k7.10;	endonuclease domain-containing 1 protein ;;endonuclease domain-containing 1 protein-like ;endonuclease domain-containing 1 protein	3	4	no	0	0	0	0	0	0	0	0	0	0
EOG090C02GH	ENSGACG00000020322	neuroligin 2b (nlgn2b), mRNA	ENSONIG00000001843	Transmembrane:Helical	nlgn2b	neuroligin-2	1	1	yes	0	0	0	0	0	0	0	0	1	0
EOG090C04IF	ENSGACG00000005905	ARP8 actin-related protein 8 homolog (yeast)	ENSONIG00000001844	Similarity:Belongs to the actin family.	actr8	ARP8 actin related protein 8 homolog	1	1	no	0	0	0	0	0	0	0	0	0	0
EOG090C0AEP	ENSGACG00000010560	ceramide synthase 1	ENSONIG00000001845	Similarity:Contains TLC (TRAM/LAG1/CLN8) domain.	cers1	ceramide synthase 1	1	1	no	0	0	0	0	0	0	0	0	0	0
EOG090C0GTH	ENSGACG00000005903	selenoprotein K	ENSONIG00000001846	Transmembrane:Helical	selenok	selenoprotein K	1	1	no	0	0	0	0	0	0	0	0	0	0
EOG090C0B3B	ENSGACG00000010568	coatomer protein complex, subunit epsilon	ENSONIG00000001847	coatomer protein complex, subunit epsilon	cope	coatomer protein complex, subunit epsilon	1	1	no	0	0	0	0	0	0	0	0	0	0
EOG090C03RG	ENSGACG00000005956	choline dehydrogenase	ENSONIG00000001848	Choline dehydrogenase	chdh	choline dehydrogenase	1	1	no	0	0	0	0	0	0	0	0	0	0
EOG090C04VK	ENSGACG00000001282	EH-domain containing 4	ENSONIG00000001849	Similarity:Contains dynamin-type G (guanine nucleotide-binding) domain.	ehd4	EH-domain containing 4	1	1	no	0	0	0	0	0	0	0	0	0	0
EOG090C00AB	ENSGACG00000001597;ENSGACG00000005980	calcium channel, voltage-dependent, L type, alpha 1D subunit, a ;calcium channel, voltage-dependent, L type, alpha 1D subunit, b	ENSONIG00000001850;ENSONIG00000007200	Similarity:Belongs to the calcium channel alpha-1 subunit (TC 1.A.1.11) family.;Similarity:Belongs to the calcium channel alpha-1 subunit (TC 1.A.1.11) family.	CACNA1D;cacna1da	calcium voltage-gated channel subunit alpha1 D ;calcium channel, voltage-dependent, L type, alpha 1D subunit, a	2	2	yes	0	0	0	0	0	0	0	0	1	0
EOG090C06BU	ENSGACG00000008146;ENSGACG00000014203	chimerin 2 ;chimerin 1	ENSONIG00000001851;ENSONIG00000002925	chimerin 1 ;chimerin 2	CHN1;chn2	N-chimaerin ;chimerin 2	2	2	no	0	0	0	0	0	0	0	0	0	0
EOG090C0E2R	ENSGACG00000010593	tumor necrosis factor, alpha-induced protein 8-like 1	ENSONIG00000001852	tumor necrosis factor, alpha-induced protein 8-like 1	tnfaip8l1	tumor necrosis factor alpha-induced protein 8-like protein 1	1	1	no	0	0	0	0	0	0	0	0	0	0
EOG090C04MO	ENSGACG00000010039	syntaxin binding protein 2	ENSONIG00000001853	syntaxin binding protein 2	stxbp2	syntaxin binding protein 2	1	1	no	0	0	0	0	0	0	0	0	0	0
EOG090C0FHV	ENSGACG00000010612	myeloid-derived growth factor	ENSONIG00000001854	myeloid-derived growth factor	mydgf	myeloid-derived growth factor	1	1	no	0	0	0	0	0	0	0	0	0	0
EOG090C0BTS	ENSGACG00000019942;ENSGACG00000020321	fibroblast growth factor 11a ;fibroblast growth factor 11b	ENSONIG00000001855;ENSONIG00000018437	Fibroblast growth factor;Fibroblast growth factor	fgf11b;fgf11a	fibroblast growth factor 11 ;fibroblast growth factor 11	2	2	no	0	0	0	0	0	0	0	0	0	0
EOG090C035F	ENSGACG00000012915	G2/M-phase specific E3 ubiquitin protein ligase	ENSONIG00000001857	G2/M-phase specific E3 ubiquitin protein ligase	g2e3	G2/M-phase specific E3 ubiquitin protein ligase	1	1	no	0	0	0	0	0	0	0	0	0	0
EOG090C01J2	ENSGACG00000004228;ENSGACG00000014216	FERM, RhoGEF (ARHGEF) and pleckstrin domain protein 1 (chondrocyte-derived) ;FERM, RhoGEF (ARHGEF) and pleckstrin domain protein 1 (chondrocyte-derived)	ENSONIG00000001858;ENSONIG00000008504	Similarity:Contains 2 PH domains.;Similarity:Contains 2 PH domains.	;FARP1	;FERM, ARHGEF and pleckstrin domain-containing protein 1	2	2	yes	0	0	0	0	0	1	0	0	0	0
EOG090C05K8	ENSGACG00000010616	lysyl oxidase-like 5b	ENSONIG00000001859	lysyl oxidase-like 5b	loxl5a	lysyl oxidase-like 5a	1	1	no	0	0	0	0	0	0	0	0	0	0
EOG090C0DCN	ENSGACG00000020319	nucleophosmin 1a (nucleolar phosphoprotein B23, numatrin)	ENSONIG00000001860	nucleophosmin 1a (nucleolar phosphoprotein B23, numatrin)	npm1a	nucleophosmin 1a	1	1	no	0	0	0	0	0	0	0	0	0	0
EOG090C0DOX	ENSGACG00000010621	muscle-specific beta 1 integrin binding protein	ENSONIG00000001861;ENSONIG00000018596	muscle-specific beta 1 integrin binding protein ;nicotinamide riboside kinase 2	;nmrk2	nicotinamide riboside kinase 2 ;nicotinamide riboside kinase 2	1	2	no	0	0	0	0	0	0	0	0	0	0
EOG090C041T	ENSGACG00000012926	sec1 family domain containing 1	ENSONIG00000001862	sec1 family domain containing 1	scfd1	sec1 family domain containing 1	1	1	no	0	0	0	0	0	0	0	0	0	0
EOG090C0BME	ENSGACG00000014228	ADP-ribosylation factor-like 13b	ENSONIG00000001864	ADP-ribosylation factor-like 13b	arl13b	ADP-ribosylation factor-like 13b	1	1	yes	0	0	0	0	0	0	0	0	1	0
EOG090C0DAY	ENSGACG00000017881;ENSGACG00000020318	Kv channel interacting protein 1 ;Kv channel interacting protein 1 b	ENSONIG00000001865;ENSONIG00000005028	Kv channel interacting protein 1 b ;Kv channel interacting protein 1	kcnip1b;KCNIP1	Kv channel-interacting protein 1 ;potassium voltage-gated channel interacting protein 1	2	2	no	0	0	0	0	0	0	0	0	0	0
EOG090C02SX	ENSGACG00000014231	neural cell adhesion molecule 2	ENSONIG00000001866	Transmembrane:Helical	zgc:152904	neural cell adhesion molecule 2	1	1	no	0	0	0	0	0	0	0	0	0	0
EOG090C01H0	ENSGACG00000010106	bromodomain containing 4	ENSONIG00000001867	bromodomain containing 4	brd4	bromodomain containing 4	1	1	no	0	0	0	0	0	0	0	0	0	0
EOG090C094H	ENSGACG00000010652;ENSGACG00000016905	ataxia, cerebellar, Cayman type a ;ataxia, cerebellar, Cayman type b	ENSONIG00000001868;ENSONIG00000018595	ataxia, cerebellar, Cayman type a ;ataxia, cerebellar, Cayman type b	atcaya;atcayb	caytaxin ;caytaxin	2	2	no	0	0	0	0	0	0	0	0	0	0
EOG090C0917	ENSGACG00000020317	histamine receptor H2b	ENSONIG00000001869	Similarity:Belongs to the G-protein coupled receptor 1 family.		histamine H2 receptor	1	1	no	0	0	0	0	0	0	0	0	0	0
EOG090C02W9	ENSGACG00000010658	zinc finger RNA binding protein 2	ENSONIG00000001871	zinc finger RNA binding protein 2	zfr2	zinc finger RNA binding protein 2	1	1	no	0	0	0	0	0	0	0	0	0	0
EOG090C015O	ENSGACG00000020313	protocadherin 1a	ENSONIG00000001872	Transmembrane:Helical	pcdh1a	protocadherin-1	1	1	yes	0	0	0	0	0	0	0	0	1	0
EOG090C00SX	ENSGACG00000020312	roundabout guidance receptor 2	ENSONIG00000001873	Transmembrane:Helical		roundabout homolog 2	1	1	no	0	0	0	0	0	0	0	0	0	0
EOG090C0B02	ENSGACG00000010121	lysophosphatidic acid receptor 2a	ENSONIG00000001874	Similarity:Belongs to the G-protein coupled receptor 1 family.	lpar2a	lysophosphatidic acid receptor 1-A	1	1	no	0	0	0	0	0	0	0	0	0	0
EOG090C0AT6	ENSGACG00000010133	pre-B-cell leukemia transcription factor 4	ENSONIG00000001875	pre-B-cell leukemia transcription factor 4	pbx4	pre-B-cell leukemia transcription factor 4	1	1	no	0	0	0	0	0	0	0	0	0	0
EOG090C01QY	ENSGACG00000014244;ENSGACG00000014485	phosphoribosylglycinamide formyltransferase ;phosphoribosylglycinamide formyltransferase	ENSONIG00000001876	phosphoribosylglycinamide formyltransferase	gart	phosphoribosylglycinamide formyltransferase, phosphoribosylglycinamide synthetase, phosphoribosylaminoimidazole synthetase	2	1	no	0	0	0	0	0	0	0	0	0	0
EOG090C015Y	ENSGACG00000010142	ATPase type 13A1	ENSONIG00000001877	Cation-transporting ATPase	atp13a1	ATPase 13A1	1	1	no	0	0	0	0	0	0	0	0	0	0
EOG090C06CD	ENSGACG00000010666	megakaryocyte-associated tyrosine kinase	ENSONIG00000001878	Tyrosine-protein kinase	matk	megakaryocyte-associated tyrosine kinase	1	1	no	0	0	0	0	0	0	0	0	0	0
EOG090C04QD	ENSGACG00000001279	coagulation factor C homolog, cochlin (Limulus polyphemus)	ENSONIG00000001879	coagulation factor C homolog, cochlin (Limulus polyphemus)	coch	cochlin	1	1	no	0	0	0	0	0	0	0	0	0	0
EOG090C09H6	ENSGACG00000010155	LIM homeobox transcription factor 1, alpha-like	ENSONIG00000001881	Similarity:Contains 2 LIM zinc-binding domains.	lmx1al	LIM homeobox transcription factor 1-alpha	1	1	no	0	0	0	0	0	0	0	0	0	0
EOG090C0EJ0	ENSGACG00000014248	N-6 adenine-specific DNA methyltransferase 1 (putative)	ENSONIG00000001882	N-6 adenine-specific DNA methyltransferase 1 (putative)	n6amt1	N-6 adenine-specific DNA methyltransferase 1	1	1	no	0	0	0	0	0	0	0	0	0	0
EOG090C0AUN	ENSGACG00000010707;ENSGACG00000016904	retinal homeobox gene 1 ;retinal homeobox gene 2	ENSONIG00000001883;ENSONIG00000018592	Similarity:Contains homeobox DNA-binding domain.;Similarity:Contains homeobox DNA-binding domain.	;rx2	retinal homeobox protein Rx1 ;retinal homeobox protein Rx2	2	2	yes	0	0	0	0	0	1	0	0	0	0
EOG090C03F7	ENSGACG00000012892	striatin, calmodulin binding protein 3	ENSONIG00000001884	striatin, calmodulin binding protein 3	strn3	striatin, calmodulin binding protein 3	1	1	no	0	0	0	0	0	0	0	0	0	0
EOG090C02PK	ENSGACG00000010159	GEM interacting protein	ENSONIG00000001885	GEM interacting protein	gmip	GEM interacting protein	1	1	yes	0	0	0	0	0	1	0	0	0	0
EOG090C05OQ	ENSGACG00000010712	fizzy/cell division cycle 20 related 1a	ENSONIG00000001886	fizzy/cell division cycle 20 related 1a		fizzy-related protein homolog	1	1	no	0	0	0	0	0	0	0	0	0	0
EOG090C0A58	ENSGACG00000000904;ENSGACG00000000907;ENSGACG00000000908;ENSGACG00000000912;ENSGACG00000000915;ENSGACG00000000925;ENSGACG00000000983;ENSGACG00000000984;ENSGACG00000002165;ENSGACG00000002252;ENSGACG00000002259;ENSGACG00000002261;ENSGACG00000008139;ENSGACG00000008304;ENSGACG00000008305;ENSGACG00000008316;ENSGACG00000008324;ENSGACG00000008537;ENSGACG00000008540;ENSGACG00000008545;ENSGACG00000008547;…	trace amine associated receptor 15 ;trace amine associated receptor 15 ;trace amine associated receptor 15 ;trace amine associated receptor 15 ;trace amine associated receptor 15 ;trace amine associated receptor 15 ;trace amine associated receptor 15 ;trace amine associated receptor 15 ;trace amine associated receptor 15 ;trace amine associated receptor 15 ;trace amine associated receptor 15 ;tra…	ENSONIG00000001887;ENSONIG00000001888;ENSONIG00000010267;ENSONIG00000010268;ENSONIG00000016206;ENSONIG00000016208;ENSONIG00000016210;ENSONIG00000016212;ENSONIG00000016214;ENSONIG00000016215;ENSONIG00000016217;ENSONIG00000016220;ENSONIG00000016221;ENSONIG00000016259;ENSONIG00000016479;ENSONIG00000016480;ENSONIG00000016481;ENSONIG00000020839;ENSONIG00000020840	Similarity:Belongs to the G-protein coupled receptor 1 family.;Similarity:Belongs to the G-protein coupled receptor 1 family.;Similarity:Belongs to the G-protein coupled receptor 1 family.;Similarity:Belongs to the G-protein coupled receptor 1 family.;Similarity:Belongs to the G-protein coupled receptor 1 family.;Similarity:Belongs to the G-protein coupled receptor 1 family.;Similarity:Belongs to…	;;;;;taar15 (1 of many);taar15 (1 of many);;;;taar15 (1 of many);;;;;;;;	trace amine-associated receptor 13c-like ;;;;;trace amine associated receptor 15 ;trace amine associated receptor 15 ;trace amine-associated receptor 13c-like ;trace amine-associated receptor 13c-like ;;trace amine-associated receptor 13c-like ;;;;trace amine-associated receptor 8a-like ;;;trace amine-associated receptor 13c-like ;	25	19	no	0	0	0	0	0	0	0	0	0	0
EOG090C08W1	ENSGACG00000014643	\N	ENSONIG00000001890	Similarity:Belongs to the PDGF/VEGF growth factor family.		vascular endothelial growth factor C	1	1	no	0	0	0	0	0	0	0	0	0	0
EOG090C03ZL	ENSGACG00000010745	HAUS augmin-like complex, subunit 5	ENSONIG00000001892	HAUS augmin-like complex, subunit 5	haus5	HAUS augmin like complex subunit 5	1	1	no	0	0	0	0	0	0	0	0	0	0
EOG090C04FI	ENSGACG00000010165;ENSGACG00000018780	collagen beta(1-O)galactosyltransferase 1 ;collagen beta(1-O)galactosyltransferase 1	ENSONIG00000001893;ENSONIG00000016358	collagen beta(1-O)galactosyltransferase 1 ;collagen beta(1-O)galactosyltransferase 1	colgalt1;si:ch211-114l13.7	collagen beta(1-O)galactosyltransferase 1 ;procollagen galactosyltransferase 1	2	2	yes	0	0	0	0	0	0	0	0	0	1
EOG090C01EQ	ENSGACG00000020311	roundabout guidance receptor 1	ENSONIG00000001894	roundabout guidance receptor 1			1	1	no	0	0	0	0	0	0	0	0	0	0
EOG090C05DX	ENSGACG00000014627	cystathionine-beta-synthase b	ENSONIG00000001895	Cystathionine beta-synthase	cbsa	cystathionine beta-synthase	1	1	no	0	0	0	0	0	0	0	0	0	0
EOG090C0FEB	ENSGACG00000012879	adaptor-related protein complex 4, sigma 1 subunit	ENSONIG00000001896	adaptor-related protein complex 4, sigma 1 subunit	ap4s1	adaptor related protein complex 4 subunit sigma 1	1	1	no	0	0	0	0	0	0	0	0	0	0
EOG090C05PR	ENSGACG00000005995	decapping mRNA 1A	ENSONIG00000001897	decapping mRNA 1A	dcp1a	decapping mRNA 1A	1	1	no	0	0	0	0	0	0	0	0	0	0
EOG090C01CB	ENSGACG00000010766	SIN3 transcription regulator family member B	ENSONIG00000001898	SIN3 transcription regulator family member B	sin3b	SIN3 transcription regulator family member B	1	1	no	0	0	0	0	0	0	0	0	0	0
EOG090C007R	ENSGACG00000012853	HECT domain containing 1	ENSONIG00000001899	Similarity:Contains 3 ANK repeats.	hectd1	HECT domain E3 ubiquitin protein ligase 1	1	1	no	0	0	0	0	0	0	0	0	0	0
EOG090C04F2	ENSGACG00000001593;ENSGACG00000006005	transketolase a ;transketolase	ENSONIG00000001900;ENSONIG00000007196	transketolase ;transketolase a	TKT;tkta	transketolase ;transketolase	2	2	no	0	0	0	0	0	0	0	0	0	0
EOG090C0DI9	ENSGACG00000010192	6-phosphogluconolactonase	ENSONIG00000001901	6-phosphogluconolactonase	pgls	6-phosphogluconolactonase	1	1	no	0	0	0	0	0	0	0	0	0	0
EOG090C0CER	ENSGACG00000010202	si:dkeyp-113d7.1	ENSONIG00000001902	Zinc finger, C2H2			1	1	no	0	0	0	0	0	0	0	0	0	0
EOG090C0EHW	ENSGACG00000003454;ENSGACG00000014605	U2 small nuclear RNA auxiliary factor 1 ;\N	ENSONIG00000001903;ENSONIG00000014309	Similarity:Contains RRM (RNA recognition motif) domain.;Similarity:Contains RRM (RNA recognition motif) domain.	;u2af1	splicing factor U2AF 35 kDa subunit ;splicing factor U2AF 35 kDa subunit	2	2	no	0	0	0	0	0	0	0	0	0	0
EOG090C05V0	ENSGACG00000010209	tripartite motif containing 35-13	ENSONIG00000001904	Similarity:Contains B30.2/SPRY domain.	trim35-13	zinc-binding protein A33	1	1	no	0	0	0	0	0	0	0	0	0	0
EOG090C03VL	ENSGACG00000010217	solute carrier family 27 (fatty acid transporter), member 1a	ENSONIG00000001905	solute carrier family 27 (fatty acid transporter), member 1a	slc27a1a	solute carrier family 27 member 1	1	1	no	0	0	0	0	0	0	0	0	0	0
EOG090C03SX	ENSGACG00000010782;ENSGACG00000014536	xenotropic and polytropic retrovirus receptor 1a ;xenotropic and polytropic retrovirus receptor 1b	ENSONIG00000001906;ENSONIG00000011003	Similarity:Contains SPX domain.;Similarity:Contains SPX domain.	xpr1a;xpr1b	xenotropic and polytropic retrovirus receptor 1 homolog ;xenotropic and polytropic retrovirus receptor 1 homolog	2	2	yes	0	0	0	0	0	0	0	0	1	0
EOG090C09L5	ENSGACG00000003619;ENSGACG00000014600	CD200 molecule ;CD200 molecule	ENSONIG00000001907;ENSONIG00000014380	Transmembrane:Helical;Transmembrane:Helical	zgc:172122;zgc:113337	zgc:172122 ;CD200 molecule	2	2	no	0	0	0	0	0	0	0	0	0	0
EOG090C069I	ENSGACG00000014669	cytochrome P450, family 4, subfamily F, polypeptide 3	ENSONIG00000001911;ENSONIG00000001929;ENSONIG00000001939	Similarity:Belongs to the cytochrome P450 family.;Similarity:Belongs to the cytochrome P450 family.;Similarity:Belongs to the cytochrome P450 family.	;;	leukotriene-B(4) omega-hydroxylase 2 ;;docosahexaenoic acid omega-hydroxylase CYP4F3	1	3	no	0	0	0	0	0	0	0	0	0	0
EOG090C05ZC	ENSGACG00000006042	NOP2/Sun domain family, member 5	ENSONIG00000001912	NOP2/Sun domain family, member 5	nsun5	NOP2/Sun domain family, member 5	1	1	no	0	0	0	0	0	0	0	0	0	0
EOG090C0BIN	ENSGACG00000010822	acyl-CoA binding domain containing 6	ENSONIG00000001913	Similarity:Contains 2 ANK repeats.	acbd6	acyl-CoA binding domain containing 6	1	1	no	0	0	0	0	0	0	0	0	0	0
EOG090C04WA	ENSGACG00000010263;ENSGACG00000018777	adhesion G protein-coupled receptor E5 ;adhesion G protein-coupled receptor E5b, duplicate 3	ENSONIG00000001914;ENSONIG00000016344	Similarity:Contains GPS domain.;Similarity:Contains GPS domain.	si:ch211-241f5.3;adgre5b.3	si:ch211-241f5.3 ;CD97 antigen	2	2	yes	0	0	0	0	0	1	0	0	0	0
EOG090C08RI	ENSGACG00000006063	serum/glucocorticoid regulated kinase 2a	ENSONIG00000001915	Catalytic Activity:ATP + a protein = ADP + a phosphoprotein.	sgk2a	SGK2, serine/threonine kinase 2	1	1	no	0	0	0	0	0	0	0	0	0	0
EOG090C06SP	ENSGACG00000020310	protein phosphatase, Mg2+/Mn2+ dependent, 1Db	ENSONIG00000001916	Similarity:Belongs to the PP2C family.		protein phosphatase 1D	1	1	no	0	0	0	0	0	0	0	0	0	0
EOG090C08GJ	ENSGACG00000010846	LIM homeobox 4	ENSONIG00000001917	Similarity:Contains 2 LIM zinc-binding domains.	lhx4	LIM homeobox 4	1	1	no	0	0	0	0	0	0	0	0	0	0
EOG090C04J3	ENSGACG00000020309	T-box 2b	ENSONIG00000001919	Similarity:Contains T-box DNA-binding domain.			1	1	no	0	0	0	0	0	0	0	0	0	0
EOG090C00OX	ENSGACG00000010280	adhesion G protein-coupled receptor L1a	ENSONIG00000001920	Similarity:Contains 1 SUEL-type lectin domain.	adgrl1a	adhesion G protein-coupled receptor L1	1	1	no	0	0	0	0	0	0	0	0	0	0
EOG090C045L	ENSGACG00000010853	quiescin Q6 sulfhydryl oxidase 1	ENSONIG00000001921	Sulfhydryl oxidase	qsox1	quiescin sulfhydryl oxidase 1	1	1	no	0	0	0	0	0	0	0	0	0	0
EOG090C005N	ENSGACG00000020308	acetyl-CoA carboxylase alpha	ENSONIG00000001922	Similarity:Contains ATP-grasp domain.	acaca	acetyl-CoA carboxylase alpha	1	1	no	0	0	0	0	0	0	0	0	0	0
EOG090C0203	ENSGACG00000006074	l(3)mbt-like 1a (Drosophila)	ENSONIG00000001923	l(3)mbt-like 1a (Drosophila)	l3mbtl1a	L3MBTL1, histone methyl-lysine binding protein a	1	1	no	0	0	0	0	0	0	0	0	0	0
EOG090C004D	ENSGACG00000010862	centrosomal protein 350	ENSONIG00000001924	centrosomal protein 350	cep350	centrosomal protein 350	1	1	no	0	0	0	0	0	0	0	0	0	0
EOG090C0ELI	ENSGACG00000006084	serine/arginine-rich splicing factor 6b	ENSONIG00000001925;ENSONIG00000020247	serine/arginine-rich splicing factor 6b ;serine/arginine-rich splicing factor 6b	srsf6a;	serine and arginine rich splicing factor 6a ;serine and arginine rich splicing factor 6	1	2	no	0	0	0	0	0	0	0	0	0	0
EOG090C0ARK	ENSGACG00000010295	\N	ENSONIG00000001926	Transmembrane:Helical	ppap2d	phospholipid phosphatase 3	1	1	no	0	0	0	0	0	0	0	0	0	0
EOG090C0BXH	ENSGACG00000006117	eukaryotic translation initiation factor 2, subunit 2 beta	ENSONIG00000001927	eukaryotic translation initiation factor 2, subunit 2 beta	eif2s2	eukaryotic translation initiation factor 2 subunit beta	1	1	no	0	0	0	0	0	0	0	0	0	0
EOG090C0078	ENSGACG00000010867	calcium channel, voltage-dependent, R type, alpha 1E subunit	ENSONIG00000001928	Similarity:Belongs to the calcium channel alpha-1 subunit (TC 1.A.1.11) family.	cacna1ea	calcium channel, voltage-dependent, R type, alpha 1E subunit a	1	1	yes	0	0	0	0	0	1	0	0	0	0
EOG090C0CLO	ENSGACG00000010301	\N	ENSONIG00000001930	Transmembrane:Helical	tnfsf14	tumor necrosis factor ligand superfamily member 14	1	1	yes	0	0	0	0	0	1	0	0	0	0
EOG090C0CX1	ENSGACG00000010304	transmembrane emp24 protein transport domain containing 1a	ENSONIG00000001931	Transmembrane:Helical	tmed1a	transmembrane emp24 domain-containing protein 1	1	1	no	0	0	0	0	0	0	0	0	0	0
EOG090C0F7A	ENSGACG00000003670;ENSGACG00000006122	charged multivesicular body protein 4Ba ;charged multivesicular body protein 4Ba	ENSONIG00000001932;ENSONIG00000004428	charged multivesicular body protein 4Ba ;charged multivesicular body protein 4Ba	chmp4bb;	charged multivesicular body protein 4Bb ;charged multivesicular body protein 4b	2	2	no	0	0	0	0	0	0	0	0	0	0
EOG090C02FK	ENSGACG00000010312	dynamin 2a	ENSONIG00000001933	Similarity:Belongs to the TRAFAC class dynamin-like GTPase superfamily. Dynamin/Fzo/YdjA family.	dnm2a	dynamin 2	1	1	no	0	0	0	0	0	0	0	0	0	0
EOG090C0CPD	ENSGACG00000005571;ENSGACG00000006131	VAMP (vesicle-associated membrane protein)-associated protein B and C ;VAMP (vesicle-associated membrane protein)-associated protein B and C	ENSONIG00000001934;ENSONIG00000006877	Transmembrane:Helical;Transmembrane:Helical	;vapb	vesicle-associated membrane protein-associated protein B/C ;VAMP associated protein B and C	2	2	no	0	0	0	0	0	0	0	0	0	0
EOG090C07XN	ENSGACG00000006159;ENSGACG00000006249	GNAS complex locus ;GNAS complex locus	ENSONIG00000001943;ENSONIG00000011493	GNAS complex locus ;GNAS complex locus	GNAS;gnas	GNAS complex locus ;guanine nucleotide-binding protein G(s) subunit alpha	2	2	no	0	0	0	0	0	0	0	0	0	0
EOG090C0094	ENSGACG00000006199	si:dkey-11f4.7	ENSONIG00000001944	Piezo-type mechanosensitive ion channel component			1	1	no	0	0	0	0	0	0	0	0	0	0
EOG090C07ZZ	ENSGACG00000010327	queuine tRNA-ribosyltransferase 1	ENSONIG00000001945	Queuine tRNA-ribosyltransferase	qtrt1	queuine tRNA-ribosyltransferase 1	1	1	no	0	0	0	0	0	0	0	0	0	0
EOG090C0121	ENSGACG00000010356	\N	ENSONIG00000001946	Transmembrane:Helical		potassium channel subfamily T member 2	1	1	no	0	0	0	0	0	0	0	0	0	0
EOG090C086G	ENSGACG00000020307	LIM homeobox 1b	ENSONIG00000001948	Similarity:Contains 2 LIM zinc-binding domains.		LIM/homeobox protein Lhx1	1	1	no	0	0	0	0	0	0	0	0	0	0
EOG090C0DBI	ENSGACG00000006217;ENSGACG00000006335	slowmo homolog 2 (Drosophila) ;slowmo homolog 2 (Drosophila)	ENSONIG00000001949	slowmo homolog 2 (Drosophila)	PRELID3B	PRELI domain containing protein 3B	2	1	no	0	0	0	0	0	0	0	0	0	0
EOG090C0242	ENSGACG00000020306	seizure related 6 homolog a	ENSONIG00000001950;ENSONIG00000008319	seizure related 6 homolog a ;Transmembrane:Helical	sez6a;sez6b	seizure related 6 homolog a ;seizure related 6 homolog b	1	2	no	0	0	0	0	0	0	0	0	0	0
EOG090C079Y	ENSGACG00000006241	BPI fold containing family C, like	ENSONIG00000001951	BPI fold containing family C, like	bpifcl	BPI fold containing family C, like	1	1	yes	0	0	0	0	0	1	0	0	1	0
EOG090C05WU	ENSGACG00000010396	tripartite motif containing 35-12	ENSONIG00000001952	Similarity:Contains B30.2/SPRY domain.	trim35-12	tripartite motif-containing protein 35	1	1	no	0	0	0	0	0	0	0	0	0	0
EOG090C01NA	ENSGACG00000010884	zgc:113232	ENSONIG00000001953	si:dkey-21p1.3	si:dkey-21p1.3	si:dkey-21p1.3	1	1	yes	0	0	0	0	0	0	0	0	1	0
EOG090C0BKG	ENSGACG00000020096	small fragment nuclease	ENSONIG00000001954	small fragment nuclease	smfn	small fragment nuclease	1	1	no	0	0	0	0	0	0	0	0	0	0
EOG090C0085	ENSGACG00000013682;ENSGACG00000020305	myosin XVIIIAb ;myosin XVIIIAa	ENSONIG00000001955;ENSONIG00000014799	Similarity:Contains 1 PDZ (DHR) domain.;Similarity:Contains 1 PDZ (DHR) domain.	myo18aa;	myosin XVIIIAa ;	2	2	yes	0	0	0	0	0	0	1	0	1	0
EOG090C05IQ	ENSGACG00000006252;ENSGACG00000006379	\N;solute carrier family 32 (GABA vesicular transporter), member 1	ENSONIG00000001956;ENSONIG00000011486	Transmembrane:Helical;Transmembrane:Helical	;slc32a1	vesicular inhibitory amino acid transporter ;vesicular inhibitory amino acid transporter	2	2	yes	0	0	0	0	0	1	0	0	0	1
EOG090C04M6	ENSGACG00000006257	ARP5 actin-related protein 5 homolog	ENSONIG00000001957	Similarity:Belongs to the actin family.	actr5	ARP5 actin related protein 5 homolog	1	1	no	0	0	0	0	0	0	0	0	0	0
EOG090C0A9K	ENSGACG00000010401	GIPC PDZ domain containing family, member 1	ENSONIG00000001958	Similarity:Contains 1 PDZ (DHR) domain.	gipc1	GIPC PDZ domain containing family member 1	1	1	yes	0	0	0	0	0	0	1	0	0	0
EOG090C0976	ENSGACG00000010423	DnaJ (Hsp40) homolog, subfamily B, member 1a	ENSONIG00000001959	DnaJ (Hsp40) homolog, subfamily B, member 1a	dnajb1a	dnaJ homolog subfamily B member 1	1	1	no	0	0	0	0	0	0	0	0	0	0
EOG090C05OS	ENSGACG00000006410	serine hydroxymethyltransferase 2 (mitochondrial)	ENSONIG00000001961;ENSONIG00000005066;ENSONIG00000005123	Serine hydroxymethyltransferase;Serine hydroxymethyltransferase;Serine hydroxymethyltransferase	SHMT2 (1 of many);shmt2 (1 of many);shmt2 (1 of many)	serine hydroxymethyltransferase, mitochondrial ;serine hydroxymethyltransferase, mitochondrial ;serine hydroxymethyltransferase 2 (mitochondrial)	1	3	no	0	0	0	0	0	0	0	0	0	0
EOG090C09QY	ENSGACG00000010428	trans-2,3-enoyl-CoA reductase a	ENSONIG00000001962	Transmembrane:Helical	tecra	very-long-chain enoyl-CoA reductase	1	1	no	0	0	0	0	0	0	0	0	0	0
EOG090C0555	ENSGACG00000010924	sterol O-acyltransferase 1	ENSONIG00000001963	O-acyltransferase	soat1	sterol O-acyltransferase 1	1	1	no	0	0	0	0	0	0	0	0	0	0
EOG090C072A	ENSGACG00000000419;ENSGACG00000020304	vascular endothelial zinc finger 1b ;vascular endothelial zinc finger 1a	ENSONIG00000001964;ENSONIG00000006414	vascular endothelial zinc finger 1a ;vascular endothelial zinc finger 1b	VEZF1;	vascular endothelial zinc finger 1 ;	2	2	no	0	0	0	0	0	0	0	0	0	0
EOG090C0AZW	ENSGACG00000001014	\N	ENSONIG00000001965;ENSONIG00000002294;ENSONIG00000003992;ENSONIG00000014058;ENSONIG00000021066	Uncharacterized protein ;Uncharacterized protein ;Uncharacterized protein ;Uncharacterized protein ;Uncharacterized protein	;;;;	;;;;	1	5	no	0	0	0	0	0	0	0	0	0	0
EOG090C02QK	ENSGACG00000020303	kinase suppressor of ras 1a	ENSONIG00000001966	Similarity:Contains protein kinase domain.	ksr1a	kinase suppressor of ras 1a	1	1	no	0	0	0	0	0	0	0	0	0	0
EOG090C0D4W	ENSGACG00000005839;ENSGACG00000012665;ENSGACG00000012682	\N;si:ch211-215k15.4 ;\N	ENSONIG00000001967;ENSONIG00000006599;ENSONIG00000006600;ENSONIG00000006602;ENSONIG00000006604;ENSONIG00000006995;ENSONIG00000007077;ENSONIG00000007850	Uncharacterized protein ;Uncharacterized protein ;Similarity:Contains 2 F5/8 type C domains.;Similarity:Contains 5 F5/8 type C domains.;Similarity:Contains 2 F5/8 type C domains.;Uncharacterized protein ;Uncharacterized protein ;Uncharacterized protein	;si:ch211-215k15.4 (1 of many);si:ch211-215k15.4 (1 of many);;;;;	;si:ch211-215k15.4 ;fucolectin-1 ;uncharacterized LOC100693091 ;uncharacterized LOC109194559 ;;;	3	8	yes	0	0	0	0	0	0	1	0	0	1
EOG090C07K2	ENSGACG00000010447	sterile alpha motif domain containing 1a	ENSONIG00000001969	sterile alpha motif domain containing 1a	samd1a	sterile alpha motif domain containing 1a	1	1	no	0	0	0	0	0	0	0	0	0	0
EOG090C08ON	ENSGACG00000010454;ENSGACG00000018837	protein kinase, cAMP-dependent, catalytic, alpha, genome duplicate a ;\N	ENSONIG00000001970;ENSONIG00000016411	Catalytic Activity:ATP + a protein = ADP + a phosphoprotein.;Catalytic Activity:ATP + a protein = ADP + a phosphoprotein.	prkacaa;prkacab	protein kinase, cAMP-dependent, catalytic, alpha, genome duplicate a ;protein kinase cAMP-activated catalytic subunit alpha	2	2	no	0	0	0	0	0	0	0	0	0	0
EOG090C00R5	ENSGACG00000013926	cell migration inducing protein, hyaluronan binding	ENSONIG00000001973	cell migration inducing protein, hyaluronan binding	cemip	cell migration inducing hyaluronidase 1	1	1	yes	0	0	0	0	0	0	0	1	0	0
EOG090C01BP	ENSGACG00000010969	c-abl oncogene 2, non-receptor tyrosine kinase	ENSONIG00000001974	Tyrosine-protein kinase	abl2	c-abl oncogene 2, non-receptor tyrosine kinase	1	1	no	0	0	0	0	0	0	0	0	0	0
EOG090C0B22	ENSGACG00000006271	SH3 and cysteine rich domain 3	ENSONIG00000001975	Similarity:Contains 1 SH3 domain.	stac3	SH3 and cysteine rich domain 3	1	1	no	0	0	0	0	0	0	0	0	0	0
EOG090C0A91	ENSGACG00000013938	abhydrolase domain containing 17C	ENSONIG00000001976	abhydrolase domain containing 17C	abhd17c	abhydrolase domain containing 17C	1	1	no	0	0	0	0	0	0	0	0	0	0
EOG090C01KB	ENSGACG00000006279;ENSGACG00000006532	kinesin family member 5A, a ;kinesin family member 5A	ENSONIG00000001977;ENSONIG00000005097	Kinesin-like protein;Kinesin-like protein	kif5aa;KIF5A (1 of many)	kinesin family member 5A, a ;kinesin family member 5A	2	2	no	0	0	0	0	0	0	0	0	0	0
EOG090C03NU	ENSGACG00000013947	aryl-hydrocarbon receptor nuclear translocator 2	ENSONIG00000001978	Similarity:Contains 1 basic helix-loop-helix (bHLH) domain.	arnt2	aryl-hydrocarbon receptor nuclear translocator 2	1	1	no	0	0	0	0	0	0	0	0	0	0
EOG090C03KI	ENSGACG00000010999	oxysterol binding protein-like 9	ENSONIG00000001979	Oxysterol-binding protein	osbpl9	oxysterol binding protein like 9	1	1	no	0	0	0	0	0	0	0	0	0	0
EOG090C0D6W	ENSGACG00000010463;ENSGACG00000018839	anti-silencing function 1Ba histone chaperone ;anti-silencing function 1B histone chaperone	ENSONIG00000001980	anti-silencing function 1Ba histone chaperone	asf1bb	histone chaperone asf1b-B	2	1	no	0	0	0	0	0	0	0	0	0	0
EOG090C08MJ	ENSGACG00000010531	tripartite motif containing 35	ENSONIG00000001982	Similarity:Contains B30.2/SPRY domain.		zinc-binding protein A33	1	1	no	0	0	0	0	0	0	0	0	0	0
EOG090C0837	ENSGACG00000011032	torsin family 3, member A	ENSONIG00000001984	torsin family 3, member A	tor3a	torsin family 3 member A	1	1	no	0	0	0	0	0	0	0	0	0	0
EOG090C05T6	ENSGACG00000010535	glucagon receptor a	ENSONIG00000001985	Transmembrane:Helical	gcgra	glucagon receptor	1	1	no	0	0	0	0	0	0	0	0	0	0
EOG090C09PC	ENSGACG00000011040	calreticulin	ENSONIG00000001987	Similarity:Belongs to the calreticulin family.	calr	calreticulin	1	1	no	0	0	0	0	0	0	0	0	0	0
EOG090C00NI	ENSGACG00000006294	si:dkey-65j6.2	ENSONIG00000001988	Similarity:Contains DH (DBL-homology) domain.			1	1	no	0	0	0	0	0	0	0	0	0	0
EOG090C0F53	ENSGACG00000000919	CKLF-like MARVEL transmembrane domain containing 7	ENSONIG00000001989	Transmembrane:Helical	cmtm7	CKLF like MARVEL transmembrane domain containing 7	1	1	no	0	0	0	0	0	0	0	0	0	0
EOG090C03LQ	ENSGACG00000011065	epidermal growth factor receptor pathway substrate 15	ENSONIG00000001990	epidermal growth factor receptor pathway substrate 15	eps15	epidermal growth factor receptor pathway substrate 15	1	1	no	0	0	0	0	0	0	0	0	0	0
EOG090C0EVK	ENSGACG00000003034	\N	ENSONIG00000001992	Transmembrane:Helical			1	1	no	0	0	0	0	0	0	0	0	0	0
EOG090C01CK	ENSGACG00000003175	solute carrier family 4, sodium bicarbonate cotransporter, member 7	ENSONIG00000001993;ENSONIG00000019680	Anion exchange protein;Anion exchange protein	slc4a7;SLC4A7	solute carrier family 4, sodium bicarbonate cotransporter, member 7 ;solute carrier family 4 member 7	1	2	yes	0	0	0	0	0	0	0	0	1	0
EOG090C0DRB	ENSGACG00000010548	zgc:103625	ENSONIG00000001995	zgc:103625	zgc:103625	methyltransferase-like 26 B	1	1	no	0	0	0	0	0	0	0	0	0	0
EOG090C04MY	ENSGACG00000010562	hepatocyte growth factor-regulated tyrosine kinase substrate	ENSONIG00000001996	Similarity:Contains VHS domain.	hgs	hepatocyte growth factor-regulated tyrosine kinase substrate	1	1	no	0	0	0	0	0	0	0	0	0	0
EOG090C04AL	ENSGACG00000011083	tetratricopeptide repeat domain 39A	ENSONIG00000001997	tetratricopeptide repeat domain 39A	ttc39a	tetratricopeptide repeat domain 39A	1	1	no	0	0	0	0	0	0	0	0	0	0
EOG090C0F9P	ENSGACG00000020023	\N	ENSONIG00000001998	Similarity:Contains C-type lectin domain.		macrophage mannose receptor 1	1	1	yes	0	0	0	0	0	0	1	0	0	0
EOG090C02B8	ENSGACG00000006108	Rap guanine nucleotide exchange factor (GEF) 5a	ENSONIG00000002005	Similarity:Contains N-terminal Ras-GEF domain.			1	1	no	0	0	0	0	0	0	0	0	0	0
EOG090C085N	ENSGACG00000010579	bloodthirsty-related gene family, member 2	ENSONIG00000002006	Similarity:Contains B30.2/SPRY domain.	btr02	bloodthirsty-related gene family, member 2	1	1	no	0	0	0	0	0	0	0	0	0	0
EOG090C0EKP	ENSGACG00000011114;ENSGACG00000017888	ring finger protein 11b ;ring finger protein 11	ENSONIG00000002007;ENSONIG00000009579	ring finger protein 11b ;ring finger protein 11	rnf11b;	ring finger protein 11b ;RING finger protein 11	2	2	no	0	0	0	0	0	0	0	0	0	0
EOG090C04O3	ENSGACG00000006304;ENSGACG00000014215;ENSGACG00000020838	kelch-like family member 10 ;kelch-like family member 10 ;kelch-like family member 10	ENSONIG00000002008;ENSONIG00000016879	Similarity:Contains 1 BTB (POZ) domain.;kelch-like family member 10	;	;	3	2	no	0	0	0	0	0	0	0	0	0	0
EOG090C08CP	ENSGACG00000010598	radical S-adenosyl methionine domain containing 1	ENSONIG00000002009	radical S-adenosyl methionine domain containing 1	rsad1	radical S-adenosyl methionine domain containing 1	1	1	no	0	0	0	0	0	0	0	0	0	0
EOG090C0B0O	ENSGACG00000006318	regulation of nuclear pre-mRNA domain containing 1B	ENSONIG00000002010	regulation of nuclear pre-mRNA domain containing 1B	rprd1b	regulation of nuclear pre-mRNA domain containing 1B	1	1	no	0	0	0	0	0	0	0	0	0	0
EOG090C0ETB	ENSGACG00000011122	cyclin-dependent kinase inhibitor 2C (p18, inhibits CDK4)	ENSONIG00000002011;ENSONIG00000005855	Similarity:Contains 2 ANK repeats.;Similarity:Contains 4 ANK repeats.	cdkn2c;	cyclin-dependent kinase inhibitor 2C (p18, inhibits CDK4) ;	1	2	no	0	0	0	0	0	0	0	0	0	0
EOG090C055F	ENSGACG00000012201	mutY DNA glycosylase	ENSONIG00000002012	mutY DNA glycosylase	MUTYH	mutY DNA glycosylase	1	1	no	0	0	0	0	0	0	0	0	0	0
EOG090C0AF2	ENSGACG00000010627	zgc:114118	ENSONIG00000002013	zgc:114118	zgc:114118	zgc:114118	1	1	no	0	0	0	0	0	0	0	0	0	0
EOG090C03I7	ENSGACG00000006324	taste receptor, type 1, member 1	ENSONIG00000002014	Transmembrane:Helical	tas1r1	taste 1 receptor member 2	1	1	no	0	0	0	0	0	0	0	0	0	0
EOG090C05AJ	ENSGACG00000010630	epsin 3a	ENSONIG00000002015	epsin 3a	epn3a	epsin-3	1	1	no	0	0	0	0	0	0	0	0	0	0
EOG090C0D0V	ENSGACG00000006102	\N	ENSONIG00000002016	Uncharacterized protein			1	1	no	0	0	0	0	0	0	0	0	0	0
EOG090C0C53	ENSGACG00000012118;ENSGACG00000012189;ENSGACG00000014352	zgc:112263 ;zgc:112263 ;zgc:153394	ENSONIG00000002017;ENSONIG00000009048	Very-long-chain 3-oxoacyl-CoA synthase;Very-long-chain 3-oxoacyl-CoA synthase	elovl8b;elovl8a	elongation of very long chain fatty acids protein 4 ;ELOVL fatty acid elongase 8a	3	2	no	0	0	0	0	0	0	0	0	0	0
EOG090C05XZ	ENSGACG00000006077	family with sequence similarity 126, member A	ENSONIG00000002018	family with sequence similarity 126, member A	FAM126A	family with sequence similarity 126 member A	1	1	no	0	0	0	0	0	0	0	0	0	0
EOG090C067B	ENSGACG00000003015	zgc:153896	ENSONIG00000002019	zgc:153896	zgc:153896	zgc:153896	1	1	no	0	0	0	0	0	0	0	0	0	0
EOG090C02HF	ENSGACG00000012767	\N	ENSONIG00000002020;ENSONIG00000004552;ENSONIG00000010953	Transmembrane:Helical;Transmembrane:Helical;Transmembrane:Helical	;;	;;	1	3	no	0	0	0	0	0	0	0	0	0	0
EOG090C0F8U	ENSGACG00000003011	mitochondrial ribosomal protein S12	ENSONIG00000002022	Similarity:Belongs to the ribosomal protein S12P family.	si:dkey-17e16.10	mitochondrial ribosomal protein S12	1	1	no	0	0	0	0	0	0	0	0	0	0
EOG090C0ALM	ENSGACG00000010637	fructosamine 3 kinase related protein	ENSONIG00000002023	fructosamine 3 kinase related protein	fn3krp	ketosamine-3-kinase	1	1	no	0	0	0	0	0	0	0	0	0	0
EOG090C03HH	ENSGACG00000003006	\N	ENSONIG00000002026	Transmembrane:Helical			1	1	no	0	0	0	0	0	0	0	0	0	0
EOG090C0FBL	ENSGACG00000006352	hairy-related 12	ENSONIG00000002028	Similarity:Contains 1 basic helix-loop-helix (bHLH) domain.	her12	transcription factor HES-5-like	1	1	no	0	0	0	0	0	0	0	0	0	0
EOG090C04CI	ENSGACG00000006062	kelch-like family member 7	ENSONIG00000002029	Similarity:Contains 1 BTB (POZ) domain.	klhl7	kelch-like family member 7	1	1	yes	0	0	0	0	0	1	0	0	0	0
EOG090C0DPF	ENSGACG00000006359	hairy-related 4, tandem duplicate 4	ENSONIG00000002031	Similarity:Contains 1 basic helix-loop-helix (bHLH) domain.	her4.2	transcription factor HES-5	1	1	yes	0	0	0	0	0	1	0	0	0	0
EOG090C0138	ENSGACG00000010647	tubulin folding cofactor D	ENSONIG00000002032	tubulin folding cofactor D	tbcd	tubulin folding cofactor D	1	1	no	0	0	0	0	0	0	0	0	0	0
EOG090C0BV4	ENSGACG00000012093	single stranded DNA binding protein 3b	ENSONIG00000002033	single stranded DNA binding protein 3b	ssbp3b	single-stranded DNA-binding protein 3	1	1	no	0	0	0	0	0	0	0	0	0	0
EOG090C000L	ENSGACG00000006365	ubiquitin protein ligase E3 component n-recognin 4	ENSONIG00000002035	ubiquitin protein ligase E3 component n-recognin 4	ubr4	ubiquitin protein ligase E3 component n-recognin 4	1	1	no	0	0	0	0	0	0	0	0	0	0
EOG090C00AJ	ENSGACG00000002987	collagen, type VI, alpha 6	ENSONIG00000002036	Similarity:Contains 1 BPTI/Kunitz inhibitor domain.	COL6A6	collagen type VI alpha 6 chain	1	1	no	0	0	0	0	0	0	0	0	0	0
EOG090C0775	ENSGACG00000006054	asteroid homolog 1 (Drosophila)	ENSONIG00000002037	asteroid homolog 1 (Drosophila)		asteroid homolog 1	1	1	no	0	0	0	0	0	0	0	0	0	0
EOG090C02B3	ENSGACG00000006036	SWI/SNF related, matrix associated, actin dependent regulator of chromatin, subfamily c, member 1b	ENSONIG00000002038	Similarity:Contains SWIRM domain.	smarcc1b	SWI/SNF related, matrix associated, actin dependent regulator of chromatin, subfamily c, member 1b	1	1	no	0	0	0	0	0	0	0	0	0	0
EOG090C04OZ	ENSGACG00000012055	acyl-CoA thioesterase 11b	ENSONIG00000002039	Similarity:Contains START domain.	acot11b	acyl-CoA thioesterase 11b	1	1	no	0	0	0	0	0	0	0	0	0	0
EOG090C00QZ	ENSGACG00000002977	phosphoinositide-3-kinase, regulatory subunit 4	ENSONIG00000002040	phosphoinositide-3-kinase, regulatory subunit 4	pik3r4	phosphoinositide-3-kinase, regulatory subunit 4	1	1	no	0	0	0	0	0	0	0	0	0	0
EOG090C02A5	ENSGACG00000002968	ATPase, Ca++ transporting, type 2C, member 1	ENSONIG00000002042	Calcium-transporting ATPase	atp2c1	ATPase secretory pathway Ca2+ transporting 1	1	1	no	0	0	0	0	0	0	0	0	0	0
EOG090C0437	ENSGACG00000010661	zinc finger protein 750	ENSONIG00000002043	zinc finger protein 750	znf750	zinc finger protein 750	1	1	no	0	0	0	0	0	0	0	0	0	0
EOG090C0B2F	ENSGACG00000010662	meteorin, glial cell differentiation regulator-like	ENSONIG00000002044	meteorin, glial cell differentiation regulator-like	metrnla	meteorin like, glial cell differentiation regulator	1	1	no	0	0	0	0	0	0	0	0	0	0
EOG090C02QZ	ENSGACG00000012036	TNNI3 interacting kinase	ENSONIG00000002045	Similarity:Contains 10 ANK repeats.	tnni3k	serine/threonine-protein kinase TNNI3K	1	1	no	0	0	0	0	0	0	0	0	0	0
EOG090C0ENE	ENSGACG00000018676	ATP synthase, H+ transporting, mitochondrial Fo complex, subunit d	ENSONIG00000002046;ENSONIG00000016264	ATP synthase, H+ transporting, mitochondrial Fo complex, subunit d ;ATP synthase, H+ transporting, mitochondrial Fo complex, subunit d	atp5pd;	ATP synthase peripheral stalk subunit d ;ATP synthase subunit d, mitochondrial	1	2	yes	0	1	0	0	0	0	0	0	0	0
EOG090C022I	ENSGACG00000006411	ER membrane protein complex subunit 1	ENSONIG00000002047	ER membrane protein complex subunit 1	emc1	ER membrane protein complex subunit 1	1	1	no	0	0	0	0	0	0	0	0	0	0
EOG090C05Y8	ENSGACG00000004121;ENSGACG00000010678	acyl-CoA synthetase family member 2 ;acyl-CoA synthetase family member 2	ENSONIG00000002049;ENSONIG00000018174	acyl-CoA synthetase family member 2 ;acyl-CoA synthetase family member 2	;acsf2	acyl-CoA synthetase family member 2, mitochondrial ;acyl-CoA synthetase family member 2, mitochondrial	2	2	no	0	0	0	0	0	0	0	0	0	0
EOG090C054K	ENSGACG00000006031	chondroitin sulfate proteoglycan 5b	ENSONIG00000002050	Transmembrane:Helical	cspg5b	chondroitin sulfate proteoglycan 5b	1	1	no	0	0	0	0	0	0	0	0	0	0
EOG090C09CS	ENSGACG00000006011	mitochondrial ribosomal protein L3	ENSONIG00000002051	Similarity:Belongs to the ribosomal protein L3P family.	mrpl3	mitochondrial ribosomal protein L3	1	1	no	0	0	0	0	0	0	0	0	0	0
EOG090C086K	ENSGACG00000012028	LIM homeobox 8b	ENSONIG00000002052	Similarity:Contains 2 LIM zinc-binding domains.	lhx8b	LIM homeobox 8	1	1	no	0	0	0	0	0	0	0	0	0	0
EOG090C06M9	ENSGACG00000006426	zgc:154075	ENSONIG00000002053	zgc:154075	zgc:154075	putative oxidoreductase YteT	1	1	no	0	0	0	0	0	0	0	0	0	0
EOG090C03KU	ENSGACG00000011985	solute carrier family 44, member 5b	ENSONIG00000002054	Transmembrane:Helical	slc44a5b	solute carrier family 44, member 5b	1	1	no	0	0	0	0	0	0	0	0	0	0
EOG090C0EYZ	ENSGACG00000006435	TAF10 RNA polymerase II, TATA box binding protein (TBP)-associated factor	ENSONIG00000002055	TAF10 RNA polymerase II, TATA box binding protein (TBP)-associated factor	taf10	TATA-box binding protein associated factor 10	1	1	no	0	0	0	0	0	0	0	0	0	0
EOG090C0543	ENSGACG00000000909;ENSGACG00000005998	copine IVa ;copine IVb	ENSONIG00000002056;ENSONIG00000002061	Similarity:Contains 1 C2 domain.;Similarity:Contains 1 C2 domain.	cpne4b;cpne4a	copine-4 ;copine-4	2	2	yes	0	0	0	0	0	0	0	0	1	0
EOG090C0E3E	ENSGACG00000012731	alkB homolog 7	ENSONIG00000002057	alkB homolog 7	alkbh7	alkB homolog 7	1	1	no	0	0	0	0	0	0	0	0	0	0
EOG090C0DVY	ENSGACG00000006443	peptidylprolyl isomerase H (cyclophilin H)	ENSONIG00000002058	Peptidyl-prolyl cis-trans isomerase	ppih	peptidylprolyl isomerase H (cyclophilin H)	1	1	no	0	0	0	0	0	0	0	0	0	0
EOG090C0G9O	ENSGACG00000000905	CKLF-like MARVEL transmembrane domain containing 6	ENSONIG00000002059	Transmembrane:Helical			1	1	no	0	0	0	0	0	0	0	0	0	0
EOG090C09W1	ENSGACG00000012677	general transcription factor IIF, polypeptide 1	ENSONIG00000002060	general transcription factor IIF, polypeptide 1	gtf2f1	general transcription factor IIF subunit 1	1	1	no	0	0	0	0	0	0	0	0	0	0
EOG090C0EFV	ENSGACG00000006447	Y box binding protein 1	ENSONIG00000002062	Similarity:Contains 1 CSD (cold-shock) domain.	ybx1	Y-box binding protein 1	1	1	no	0	0	0	0	0	0	0	0	0	0
EOG090C0DV6	ENSGACG00000018283	zgc:113625	ENSONIG00000002063	zgc:113625			1	1	no	0	0	0	0	0	0	0	0	0	0
EOG090C01P1	ENSGACG00000012669	adhesion G protein-coupled receptor E7	ENSONIG00000002064	Similarity:Contains GPS domain.			1	1	no	0	0	0	0	0	0	0	0	0	0
EOG090C0DC7	ENSGACG00000000789;ENSGACG00000003864;ENSGACG00000019642	zRAB1B, member RAS oncogene family a ;RAB1A, member RAS oncogene family b ;RAB1A, member RAS oncogene family a	ENSONIG00000002065;ENSONIG00000006819	Similarity:Belongs to the small GTPase superfamily. Rab family.;Similarity:Belongs to the small GTPase superfamily. Rab family.	rab1ba;	zRAB1B, member RAS oncogene family a ;	3	2	no	0	0	0	0	0	0	0	0	0	0
EOG090C06JN	ENSGACG00000005992	dynein, cytoplasmic 1, light intermediate chain 1	ENSONIG00000002066	dynein, cytoplasmic 1, light intermediate chain 1	dync1li1	cytoplasmic dynein 1 light intermediate chain 1	1	1	no	0	0	0	0	0	0	0	0	0	0
EOG090C055Q	ENSGACG00000006452	Rho guanine nucleotide exchange factor (GEF) 16	ENSONIG00000002067	Similarity:Contains DH (DBL-homology) domain.	arhgef16	Rho guanine nucleotide exchange factor 16	1	1	no	0	0	0	0	0	0	0	0	0	0
EOG090C0A7G	ENSGACG00000011969;ENSGACG00000016532	ST6 (alpha-N-acetyl-neuraminyl-2,3-beta-galactosyl-1,3)-N-acetylgalactosaminide alpha-2,6-sialyltransferase 5b ;ST6 (alpha-N-acetyl-neuraminyl-2,3-beta-galactosyl-1,3)-N-acetylgalactosaminide alpha-2,6-sialyltransferase 5a	ENSONIG00000002068;ENSONIG00000018361	Transmembrane:Helical;ST6 (alpha-N-acetyl-neuraminyl-2,3-beta-galactosyl-1,3)-N-acetylgalactosaminide alpha-2,6-sialyltransferase 5a	st6galnac5b;st6galnac5a	alpha-N-acetylgalactosaminide alpha-2,6-sialyltransferase 5 ;ST6 (alpha-N-acetyl-neuraminyl-2,3-beta-galactosyl-1,3)-N-acetylgalactosaminide alpha-2,6-sialyltransferase 5a	2	2	yes	0	0	0	0	0	0	0	1	0	0
EOG090C06MY	ENSGACG00000000782	pellino E3 ubiquitin protein ligase family member 3	ENSONIG00000002069	pellino E3 ubiquitin protein ligase family member 3	peli3	pellino E3 ubiquitin protein ligase family member 3	1	1	no	0	0	0	0	0	0	0	0	0	0
EOG090C02V8	ENSGACG00000006464	espin	ENSONIG00000002070	Similarity:Contains 9 ANK repeats.	espn	espin	1	1	no	0	0	0	0	0	0	0	0	0	0
EOG090C0A8F	ENSGACG00000011963	prostaglandin F receptor (FP)	ENSONIG00000002071	Similarity:Belongs to the G-protein coupled receptor 1 family.	ptgfr	prostaglandin F receptor (FP)	1	1	no	0	0	0	0	0	0	0	0	0	0
EOG090C0CB2	ENSGACG00000000777;ENSGACG00000020443	Ras converting CAAX endopeptidase 1a ;Ras converting CAAX endopeptidase 1b	ENSONIG00000002072;ENSONIG00000008564	Transmembrane:Helical;Transmembrane:Helical	rce1a;	CAAX prenyl protease 2 ;CAAX prenyl protease 2	2	2	yes	0	0	0	0	0	1	0	0	0	0
EOG090C02UF	ENSGACG00000000769;ENSGACG00000012664	extracellular leucine-rich repeat and fibronectin type III domain containing 2a ;extracellular leucine-rich repeat and fibronectin type III domain containing 2	ENSONIG00000002073;ENSONIG00000016912	Transmembrane:Helical;Transmembrane:Helical	ELFN2;elfn2a	extracellular leucine rich repeat and fibronectin type III domain containing 2 ;extracellular leucine-rich repeat and fibronectin type III domain containing 2a	2	2	no	0	0	0	0	0	0	0	0	0	0
EOG090C09LI	ENSGACG00000011897	ELOVL fatty acid elongase 1b	ENSONIG00000002074	Very-long-chain 3-oxoacyl-CoA synthase	elovl1b	ELOVL fatty acid elongase 1b	1	1	no	0	0	0	0	0	0	0	0	0	0
EOG090C03E3	ENSGACG00000012637	small G protein signaling modulator 3	ENSONIG00000002075	Similarity:Contains 1 SH3 domain.	sgsm3	small G protein signaling modulator 3	1	1	no	0	0	0	0	0	0	0	0	0	0
EOG090C032P	ENSGACG00000000776	CD248 molecule, endosialin a	ENSONIG00000002076	Transmembrane:Helical	cd248a	CD248 molecule, endosialin a	1	1	no	0	0	0	0	0	0	0	0	0	0
EOG090C0E75	ENSGACG00000006470	hes family bHLH transcription factor 2, tandem duplicate 2	ENSONIG00000002077	Similarity:Contains 1 basic helix-loop-helix (bHLH) domain.	HES2 (1 of many)	hes family bHLH transcription factor 2	1	1	no	0	0	0	0	0	0	0	0	0	0
EOG090C08XD	ENSGACG00000000726;ENSGACG00000000727	small nuclear RNA activating complex, polypeptide 2, 45kDa ;small nuclear RNA activating complex, polypeptide 2, 45kDa	ENSONIG00000002078	small nuclear RNA activating complex, polypeptide 2, 45kDa			2	1	yes	0	1	0	0	0	0	0	0	0	0
EOG090C02UQ	ENSGACG00000005983	\N	ENSONIG00000002079	Uncharacterized protein		catenin beta-1	1	1	no	0	0	0	0	0	0	0	0	0	0
EOG090C0AHX	ENSGACG00000006473	acyl-CoA thioesterase 7	ENSONIG00000002081	acyl-CoA thioesterase 7	acot7	acyl-CoA thioesterase 7	1	1	no	0	0	0	0	0	0	0	0	0	0
EOG090C0FCB	ENSGACG00000011943;ENSGACG00000016586	basic transcription factor 3-like 4 ;\N	ENSONIG00000002085;ENSONIG00000018429	Transcription factor BTF3;Transcription factor BTF3	btf3l4;BTF3L4 (1 of many)	transcription factor BTF3 homolog 4 ;transcription factor BTF3 homolog 4	2	2	no	0	0	0	0	0	0	0	0	0	0
EOG090C03PS	ENSGACG00000001506	\N	ENSONIG00000002087	Transmembrane:Helical	dcst2	DC-STAMP domain containing 2	1	1	no	0	0	0	0	0	0	0	0	0	0
EOG090C04A5	ENSGACG00000012617	GTP binding protein 1	ENSONIG00000002088	GTP binding protein 1	GTPBP1	GTP binding protein 1	1	1	no	0	0	0	0	0	0	0	0	0	0
EOG090C03NA	ENSGACG00000006503	G protein-coupled receptor 153	ENSONIG00000002089	Transmembrane:Helical	gpr153	G protein-coupled receptor 153	1	1	no	0	0	0	0	0	0	0	0	0	0
EOG090C03YA	ENSGACG00000000876	ADAM metallopeptidase domain 15	ENSONIG00000002090	Similarity:Contains 1 disintegrin domain.	adam15	ADAM metallopeptidase domain 15	1	1	no	0	0	0	0	0	0	0	0	0	0
EOG090C02B9	ENSGACG00000006506;ENSGACG00000006510;ENSGACG00000006517;ENSGACG00000006525;ENSGACG00000006529;ENSGACG00000006534;ENSGACG00000006536;ENSGACG00000006762	\N;\N;\N;\N;\N;\N;\N;\N	ENSONIG00000002091;ENSONIG00000002095	Transmembrane:Helical;Transmembrane:Helical	;	taste receptor type 1 member 1-like ;taste receptor type 1 member 1-like	8	2	no	0	0	0	0	0	0	0	0	0	0
EOG090C02L2	ENSGACG00000011930	zinc finger, FYVE domain containing 9b	ENSONIG00000002092	zinc finger, FYVE domain containing 9b	zfyve9b	zinc finger, FYVE domain containing 9b	1	1	no	0	0	0	0	0	0	0	0	0	0
EOG090C07FG	ENSGACG00000005968	N-myc downstream regulated 1a	ENSONIG00000002093	N-myc downstream regulated 1a	ndrg1a	protein NDRG1	1	1	yes	0	0	0	0	0	1	0	0	1	0
EOG090C0CMS	ENSGACG00000011891	MOB kinase activator 3C	ENSONIG00000002094	MOB kinase activator 3C	mob3c	MOB kinase activator 3C	1	1	no	0	0	0	0	0	0	0	0	0	0
EOG090C06Y4	ENSGACG00000011869	MAP kinase interacting serine/threonine kinase 1	ENSONIG00000002096	MAP kinase interacting serine/threonine kinase 1	mknk1	MAP kinase-interacting serine/threonine-protein kinase 1	1	1	no	0	0	0	0	0	0	0	0	0	0
EOG090C0F9R	ENSGACG00000012609;ENSGACG00000012631	lectin, galactoside-binding, soluble, 1 ;lectin, galactoside-binding, soluble, 1	ENSONIG00000002098;ENSONIG00000002099;ENSONIG00000002102;ENSONIG00000002103	Galectin;Galectin;Galectin;Galectin	;;;	;beta-galactoside-binding lectin ;beta-galactoside-binding lectin ;beta-galactoside-binding lectin	2	4	no	0	0	0	0	0	0	0	0	0	0
EOG090C0DD7	ENSGACG00000006541	retention in endoplasmic reticulum sorting receptor 1	ENSONIG00000002100	Transmembrane:Helical	rer1	retention in endoplasmic reticulum sorting receptor 1	1	1	no	0	0	0	0	0	0	0	0	0	0
EOG090C0B5F	ENSGACG00000011864;ENSGACG00000015618	diencephalon/mesencephalon homeobox 1b ;diencephalon/mesencephalon homeobox 1a	ENSONIG00000002101;ENSONIG00000010542	Similarity:Contains homeobox DNA-binding domain.;Similarity:Contains homeobox DNA-binding domain.	dmbx1b;dmbx1a	diencephalon/mesencephalon homeobox protein 1-A ;diencephalon/mesencephalon homeobox protein 1-A	2	2	yes	0	0	0	0	0	0	0	0	0	1
EOG090C05KC	ENSGACG00000011857	fatty acid amide hydrolase	ENSONIG00000002105	Transmembrane:Helical			1	1	no	0	0	0	0	0	0	0	0	0	0
EOG090C03WO	ENSGACG00000006547	tumor protein p73	ENSONIG00000002106	tumor protein p73	tp73	tumor protein p73	1	1	no	0	0	0	0	0	0	0	0	0	0
EOG090C09SB	ENSGACG00000005961	WNT1 inducible signaling pathway protein 1a	ENSONIG00000002107	Similarity:Contains CTCK (C-terminal cystine knot-like) domain.	ccn4a	cellular communication network factor 4	1	1	yes	0	0	0	0	0	0	0	0	1	0
EOG090C0C0O	ENSGACG00000005947	Src-like-adaptor 1	ENSONIG00000002108	Similarity:Contains SH2 domain.	sla1a	Src like adaptor	1	1	no	0	0	0	0	0	0	0	0	0	0
EOG090C0CAW	ENSGACG00000012598	LUC7-like 3 pre-mRNA splicing factor	ENSONIG00000002109	LUC7-like 3 pre-mRNA splicing factor	luc7l3	LUC7-like 3 pre-mRNA splicing factor	1	1	no	0	0	0	0	0	0	0	0	0	0
EOG090C06IF	ENSGACG00000006567	WD repeat containing, antisense to TP73	ENSONIG00000002110	WD repeat containing, antisense to TP73	wrap73	WD repeat containing, antisense to TP73	1	1	no	0	0	0	0	0	0	0	0	0	0
EOG090C0DZ4	ENSGACG00000005936	family with sequence similarity 206, member A	ENSONIG00000002111	family with sequence similarity 206, member A	fam206a	family with sequence similarity 206 member A	1	1	no	0	0	0	0	0	0	0	0	0	0
EOG090C08IO	ENSGACG00000012593	ankyrin repeat domain 40	ENSONIG00000002112	Similarity:Contains 2 ANK repeats.	ankrd40	ankyrin repeat domain 40	1	1	no	0	0	0	0	0	0	0	0	0	0
EOG090C0722	ENSGACG00000011790;ENSGACG00000011847	cytochrome P450, family 2, subfamily J, polypeptide 2 ;cytochrome P450, family 2, subfamily J, polypeptide 2	ENSONIG00000002114	Transmembrane:Helical			2	1	no	0	0	0	0	0	0	0	0	0	0
EOG090C03YE	ENSGACG00000005897;ENSGACG00000012587	WAP, follistatin/kazal, immunoglobulin, kunitz and netrin domain containing 2 ;info WAP, follistatin/kazal, immunoglobulin, kunitz and netrin domain containing 2a	ENSONIG00000002115;ENSONIG00000019589	Similarity:Contains 2 BPTI/Kunitz inhibitor domains.;Similarity:Contains 2 BPTI/Kunitz inhibitor domains.	wfikkn2a;	WAP, Kazal, immunoglobulin, Kunitz and NTR domain-containing protein 2 ;WAP, Kazal, immunoglobulin, Kunitz and NTR domain-containing protein 2	2	2	no	0	0	0	0	0	0	0	0	0	0
EOG090C0AQE	ENSGACG00000006584	tumor protein p63 regulated 1-like	ENSONIG00000002116	tumor protein p63 regulated 1-like	tprg1l	tumor protein p63 regulated 1 like	1	1	no	0	0	0	0	0	0	0	0	0	0
EOG090C035A	ENSGACG00000005928	catenin (cadherin-associated protein), alpha-like 1	ENSONIG00000002117	catenin (cadherin-associated protein), alpha-like 1	ctnnal1	catenin alpha like 1	1	1	no	0	0	0	0	0	0	0	0	0	0
EOG090C07HZ	ENSGACG00000011760	growth hormone releasing hormone receptor, like	ENSONIG00000002118	Transmembrane:Helical	GHRHR	growth hormone releasing hormone receptor	1	1	no	0	0	0	0	0	0	0	0	0	0
EOG090C00ZN	ENSGACG00000004995;ENSGACG00000012567	sperm associated antigen 9 ;sperm associated antigen 9a	ENSONIG00000002119;ENSONIG00000019590	sperm associated antigen 9a ;sperm associated antigen 9	spag9a;SPAG9	C-Jun-amino-terminal kinase-interacting protein 4 ;C-Jun-amino-terminal kinase-interacting protein 4	2	2	no	0	0	0	0	0	0	0	0	0	0
EOG090C0110	ENSGACG00000006600	PR domain containing 16	ENSONIG00000002121	PR domain containing 16	si:ch211-263k4.2	si:ch211-263k4.2	1	1	no	0	0	0	0	0	0	0	0	0	0
EOG090C00Z3	ENSGACG00000011746	FYVE and coiled-coil domain containing 1a	ENSONIG00000002122	Similarity:Contains RUN domain.	fyco1a	FYVE and coiled-coil domain containing 1a	1	1	no	0	0	0	0	0	0	0	0	0	0
EOG090C025F	ENSGACG00000005913	elongator acetyltransferase complex subunit 2	ENSONIG00000002123	elongator acetyltransferase complex subunit 2	elp2	elongator acetyltransferase complex subunit 2	1	1	no	0	0	0	0	0	0	0	0	0	0
EOG090C0BLO	ENSGACG00000006609	elastase 2	ENSONIG00000002124	Similarity:Belongs to the peptidase S1 family.	ela2	chymotrypsin-like elastase family member 2A	1	1	no	0	0	0	0	0	0	0	0	0	0
EOG090C095R	ENSGACG00000011742	chemokine (C motif) receptor 1a, duplicate 1	ENSONIG00000002126	Transmembrane:Helical	XCR1	X-C motif chemokine receptor 1	1	1	no	0	0	0	0	0	0	0	0	0	0
EOG090C022K	ENSGACG00000011711	olfactomedin-like 2Ba	ENSONIG00000002131	Similarity:Contains olfactomedin-like domain.	olfml2ba	olfactomedin-like 2Ba	1	1	no	0	0	0	0	0	0	0	0	0	0
EOG090C01U7	ENSGACG00000005895	gamma-aminobutyric acid (GABA) B receptor, 2	ENSONIG00000002134	Transmembrane:Helical	gabbr2	gamma-aminobutyric acid type B receptor subunit 2	1	1	yes	0	0	0	0	0	1	0	0	1	0
EOG090C0G9I	ENSGACG00000018941	si:ch211-202h22.7	ENSONIG00000002135;ENSONIG00000017691;ENSONIG00000017692	Transmembrane:Helical;Transmembrane:Helical;Transmembrane:Helical	;;si:ch211-202h22.7	cell death-inducing p53-target protein 1 ;;lipopolysaccharide-induced tumor necrosis factor-alpha factor homolog	1	3	yes	0	0	0	0	0	0	0	1	0	0
EOG090C0CUH	ENSGACG00000012543;ENSGACG00000012544	\N;zgc:77748	ENSONIG00000002136	Transmembrane:Helical	zgc:77748	myeloid-associated differentiation marker	2	1	no	0	0	0	0	0	0	0	0	0	0
EOG090C04VF	ENSGACG00000011702	activating transcription factor 6	ENSONIG00000002137	activating transcription factor 6	atf6	activating transcription factor 6	1	1	no	0	0	0	0	0	0	0	0	0	0
EOG090C094N	ENSGACG00000012535;ENSGACG00000018944	somatostatin receptor 5 ;somatostatin receptor 5	ENSONIG00000002138;ENSONIG00000017693	Similarity:Belongs to the G-protein coupled receptor 1 family.;Similarity:Belongs to the G-protein coupled receptor 1 family.	;	;somatostatin-like receptor F_48D10.1	2	2	yes	0	0	0	0	0	0	0	0	1	0
EOG090C084F	ENSGACG00000012529	solute carrier family 9, subfamily A (NHE3, cation proton antiporter 3), member 3 regulator 2	ENSONIG00000002139	Na(+)/H(+) exchange regulatory cofactor NHE-RF			1	1	no	0	0	0	0	0	0	0	0	0	0
EOG090C0BN5	ENSGACG00000006646	elastase 2 like	ENSONIG00000002140	Similarity:Belongs to the peptidase S1 family.	ela2l	chymotrypsin-like elastase family member 2A	1	1	no	0	0	0	0	0	0	0	0	0	0
EOG090C08ZI	ENSGACG00000012472	deoxyhypusine synthase	ENSONIG00000002141	deoxyhypusine synthase	dhps	deoxyhypusine synthase	1	1	no	0	0	0	0	0	0	0	0	0	0
EOG090C0B54	ENSGACG00000000888	nudix (nucleoside diphosphate linked moiety X)-type motif 17	ENSONIG00000002142	nudix (nucleoside diphosphate linked moiety X)-type motif 17	nudt17	nudix hydrolase 17	1	1	no	0	0	0	0	0	0	0	0	0	0
EOG090C07CE	ENSGACG00000011685	retinoid X receptor, gamma b	ENSONIG00000002143	Similarity:Belongs to the nuclear hormone receptor family.		retinoic acid receptor RXR-gamma-B	1	1	no	0	0	0	0	0	0	0	0	0	0
EOG090C008C	ENSGACG00000000896	thyroglobulin	ENSONIG00000002144	thyroglobulin		thyroglobulin	1	1	no	0	0	0	0	0	0	0	0	0	0
EOG090C0GPE	ENSGACG00000012468	si:dkey-117i10.1	ENSONIG00000002145	Guanine nucleotide-binding protein subunit gamma	si:dkey-117i10.1	si:dkey-117i10.1	1	1	no	0	0	0	0	0	0	0	0	0	0
EOG090C071C	ENSGACG00000012460	F-box and WD repeat domain containing 9	ENSONIG00000002146	Similarity:Contains 1 F-box domain.	fbxw9	F-box and WD repeat domain containing 9	1	1	no	0	0	0	0	0	0	0	0	0	0
EOG090C024H	ENSGACG00000012449;ENSGACG00000018968	transportin 2 (importin 3, karyopherin beta 2b) ;transportin 2	ENSONIG00000002147;ENSONIG00000017706	transportin 2 (importin 3, karyopherin beta 2b) ;transportin 2	tnpo2;	transportin 2 ;	2	2	no	0	0	0	0	0	0	0	0	0	0
EOG090C05QI	ENSGACG00000012437	interleukin 12 receptor, beta 2a, like	ENSONIG00000002150	Transmembrane:Helical			1	1	no	0	0	0	0	0	0	0	0	0	0
EOG090C08V0	ENSGACG00000011682	LIM homeobox transcription factor 1, alpha	ENSONIG00000002151	Similarity:Contains 2 LIM zinc-binding domains.	lmx1a	LIM homeobox transcription factor 1, alpha	1	1	no	0	0	0	0	0	0	0	0	0	0
EOG090C051J	ENSGACG00000005879	UDP-N-acetyl-alpha-D-galactosamine:polypeptide N-acetylgalactosaminyltransferase 12	ENSONIG00000002153	Protein-UDP acetylgalactosaminyltransferase	galnt12	polypeptide N-acetylgalactosaminyltransferase 12	1	1	no	0	0	0	0	0	0	0	0	0	0
EOG090C0EX1	ENSGACG00000012435	relaxin 3a	ENSONIG00000002154	Similarity:Belongs to the insulin family.	rln3a	relaxin-3	1	1	no	0	0	0	0	0	0	0	0	0	0
EOG090C0DA3	ENSGACG00000006734	transmembrane protein 51a	ENSONIG00000002156	Transmembrane:Helical	tmem51a	transmembrane protein 51	1	1	no	0	0	0	0	0	0	0	0	0	0
EOG090C032R	ENSGACG00000012429	regulatory factor X, 1a (influences HLA class II expression)	ENSONIG00000002158	regulatory factor X, 1a (influences HLA class II expression)	rfx1a	regulatory factor X, 1a (influences HLA class II expression)	1	1	no	0	0	0	0	0	0	0	0	0	0
EOG090C07X1	ENSGACG00000003136	synaptotagmin XIa	ENSONIG00000002159	Similarity:Contains 2 C2 domains.	syt11b	synaptotagmin XIb	1	1	no	0	0	0	0	0	0	0	0	0	0
EOG090C02TY	ENSGACG00000001211;ENSGACG00000006736	kazrin, periplakin interacting protein b ;kazrin, periplakin interacting protein a	ENSONIG00000002160;ENSONIG00000003926	kazrin, periplakin interacting protein a ;kazrin, periplakin interacting protein b	kazna;kaznb	kazrin, periplakin interacting protein a ;kazrin, periplakin interacting protein b	2	2	no	0	0	0	0	0	0	0	0	0	0
EOG090C04BQ	ENSGACG00000005874	POC1 centriolar protein homolog B (Chlamydomonas), like	ENSONIG00000002161	Protein-UDP acetylgalactosaminyltransferase	poc1bl	polypeptide N-acetylgalactosaminyltransferase 4	1	1	no	0	0	0	0	0	0	0	0	0	0
EOG090C0E41	ENSGACG00000003141	Williams Beuren syndrome chromosome region 27	ENSONIG00000002162	Williams Beuren syndrome chromosome region 27			1	1	no	0	0	0	0	0	0	0	0	0	0
EOG090C07FL	ENSGACG00000012422;ENSGACG00000018990	KH-type splicing regulatory protein ;KH-type splicing regulatory protein	ENSONIG00000002163;ENSONIG00000017713	Similarity:Contains 4 KH domains.;Similarity:Contains 4 KH domains.	KHSRP;khsrp	KH-type splicing regulatory protein ;far upstream element-binding protein 2	2	2	no	0	0	0	0	0	0	0	0	0	0
EOG090C0AMY	ENSGACG00000003143	metaxin 1a	ENSONIG00000002166	Transmembrane:Helical	mtx1a	metaxin 1a	1	1	no	0	0	0	0	0	0	0	0	0	0
EOG090C08HP	ENSGACG00000006756	\N	ENSONIG00000002167	Similarity:Contains fork-head DNA-binding domain.			1	1	no	0	0	0	0	0	0	0	0	0	0
EOG090C02BI	ENSGACG00000003156	thrombospondin 3b	ENSONIG00000002170	thrombospondin 3b	thbs3a	thrombospondin 3	1	1	no	0	0	0	0	0	0	0	0	0	0
EOG090C08JB	ENSGACG00000006774	zinc finger, MYND-type containing 12	ENSONIG00000002171	zinc finger, MYND-type containing 12	zmynd12	zinc finger MYND-type containing 12	1	1	no	0	0	0	0	0	0	0	0	0	0
EOG090C02L3	ENSGACG00000011663	selectin E	ENSONIG00000002172	Similarity:Contains C-type lectin domain.	SELE	selectin E	1	1	no	0	0	0	0	0	0	0	0	0	0
EOG090C0EN3	ENSGACG00000005866	chromosome 18 open reading frame 21	ENSONIG00000002173	chromosome 18 open reading frame 21	si:dkey-184p18.2	si:dkey-184p18.2	1	1	no	0	0	0	0	0	0	0	0	0	0
EOG090C0F3O	ENSGACG00000005861	retinitis pigmentosa 9 (autosomal dominant)	ENSONIG00000002174	retinitis pigmentosa 9 (autosomal dominant)	rp9	RP9, pre-mRNA splicing factor	1	1	no	0	0	0	0	0	0	0	0	0	0
EOG090C0F41	ENSGACG00000011653	si:dkey-51e6.1	ENSONIG00000002175	si:dkey-51e6.1	si:dkey-51e6.1	14 kDa phosphohistidine phosphatase	1	1	no	0	0	0	0	0	0	0	0	0	0
EOG090C02Z2	ENSGACG00000011634	chromosome 1 open reading frame 112	ENSONIG00000002177	chromosome 1 open reading frame 112	si:dkey-97o5.1	linkage group 23 C1orf112 homolog	1	1	no	0	0	0	0	0	0	0	0	0	0
EOG090C00NP	ENSGACG00000012409	ATPase family, AAA domain containing 5a	ENSONIG00000002178	ATPase family, AAA domain containing 5a	atad5a	ATPase family, AAA domain containing 5	1	1	no	0	0	0	0	0	0	0	0	0	0
EOG090C0370	ENSGACG00000005835	engulfment and cell motility 1 (ced-12 homolog, C. elegans)	ENSONIG00000002179	engulfment and cell motility 1 (ced-12 homolog, C. elegans)	elmo1	engulfment and cell motility 1 (ced-12 homolog, C. elegans)	1	1	no	0	0	0	0	0	0	0	0	0	0
EOG090C0FAH	ENSGACG00000006781;ENSGACG00000007437	epithelial membrane protein 3b ;epithelial membrane protein 3	ENSONIG00000002180;ENSONIG00000003916	Transmembrane:Helical;Transmembrane:Helical	emp3b;si:dkey-264d12.4	epithelial membrane protein 3 ;epithelial membrane protein 3	2	2	no	0	0	0	0	0	0	0	0	0	0
EOG090C0756	ENSGACG00000006798;ENSGACG00000007453	zinc finger protein 362b ;zinc finger protein 362a	ENSONIG00000002181;ENSONIG00000004076	zinc finger protein 362b ;zinc finger protein 362a	znf362b;znf362a	zinc finger protein 362 ;zinc finger protein 362	2	2	no	0	0	0	0	0	0	0	0	0	0
EOG090C027E	ENSGACG00000006804	tetratricopeptide repeat domain 34	ENSONIG00000002182	tetratricopeptide repeat domain 34	ttc34	tetratricopeptide repeat domain 34	1	1	no	0	0	0	0	0	0	0	0	0	0
EOG090C0827	ENSGACG00000012403;ENSGACG00000019412	ArfGAP with dual PH domains 2 ;ArfGAP with dual PH domains 2	ENSONIG00000002183;ENSONIG00000018106	Similarity:Contains 2 PH domains.;Similarity:Contains 2 PH domains.	adap2;	arf-GAP with dual PH domain-containing protein 2 ;ArfGAP with dual PH domains 2	2	2	yes	0	0	0	0	0	0	0	0	1	0
EOG090C049Q	ENSGACG00000006807	aminolevulinate, delta-, synthase 2	ENSONIG00000002184	5-aminolevulinic acid synthase	alas2	aminolevulinate, delta-, synthase 2	1	1	no	0	0	0	0	0	0	0	0	0	0
EOG090C03WB	ENSGACG00000011611	SCY1-like, kinase-like 3	ENSONIG00000002185	SCY1-like, kinase-like 3	scyl3	SCY1 like pseudokinase 3	1	1	no	0	0	0	0	0	0	0	0	0	0
EOG090C08BR	ENSGACG00000012413	si:dkey-199f5.8	ENSONIG00000002187	Transmembrane:Helical	si:dkey-199f5.8	si:dkey-199f5.8	1	1	no	0	0	0	0	0	0	0	0	0	0
EOG090C03H0	ENSGACG00000012363;ENSGACG00000019410	ras homolog family member T1a ;ras homolog family member T1	ENSONIG00000002188;ENSONIG00000018110	Mitochondrial Rho GTPase;Mitochondrial Rho GTPase	rhot1a;rhot1b	mitochondrial Rho GTPase 1-A ;mitochondrial Rho GTPase 1-A	2	2	no	0	0	0	0	0	0	0	0	0	0
EOG090C086B	ENSGACG00000012379	proteasome (prosome, macropain) 26S subunit, ATPase, 4	ENSONIG00000002189	Similarity:Belongs to the AAA ATPase family.	psmc4	proteasome 26S subunit, ATPase 4	1	1	no	0	0	0	0	0	0	0	0	0	0
EOG090C07K7	ENSGACG00000011604	leupaxin	ENSONIG00000002190	Similarity:Contains 4 LIM zinc-binding domains.	lpxn	leupaxin	1	1	no	0	0	0	0	0	0	0	0	0	0
EOG090C08WS	ENSGACG00000006069;ENSGACG00000006835	N-terminal EF-hand calcium binding protein 3 ;N-terminal EF-hand calcium binding protein 3	ENSONIG00000002191;ENSONIG00000006799	N-terminal EF-hand calcium binding protein 3 ;Transmembrane:Helical	;necab3	;N-terminal EF-hand calcium binding protein 3	2	2	yes	0	0	0	0	0	0	0	0	1	0
EOG090C055Y	ENSGACG00000011603	si:ch211-120j21.1	ENSONIG00000002192	si:ch211-120j21.1	trabd2b	metalloprotease TIKI2	1	1	no	0	0	0	0	0	0	0	0	0	0
EOG090C09SP	ENSGACG00000011588	HAUS augmin-like complex, subunit 8	ENSONIG00000002193	HAUS augmin-like complex, subunit 8			1	1	no	0	0	0	0	0	0	0	0	0	0
EOG090C07S4	ENSGACG00000011585	SAC3 domain containing 1	ENSONIG00000002194	SAC3 domain containing 1	si:zfos-452g4.1	si:zfos-452g4.1	1	1	no	0	0	0	0	0	0	0	0	0	0
EOG090C00D6	ENSGACG00000011570	C3 and PZP-like, alpha-2-macroglobulin domain containing 8	ENSONIG00000002195	C3 and PZP-like, alpha-2-macroglobulin domain containing 8	cpamd8	C3 and PZP like, alpha-2-macroglobulin domain containing 8	1	1	no	0	0	0	0	0	0	0	0	0	0
EOG090C05TT	ENSGACG00000006841	\N	ENSONIG00000002196	Transmembrane:Helical			1	1	no	0	0	0	0	0	0	0	0	0	0
EOG090C0DY8	ENSGACG00000002503;ENSGACG00000012366	sodium channel, voltage-gated, type I, beta b ;sodium channel, voltage-gated, type I, beta a	ENSONIG00000002197;ENSONIG00000013785	Transmembrane:Helical;Transmembrane:Helical	scn1ba;	sodium channel, voltage-gated, type I, beta a ;sodium voltage-gated channel beta subunit 1	2	2	no	0	0	0	0	0	0	0	0	0	0
EOG090C02J0	ENSGACG00000005816	peroxisomal biogenesis factor 1	ENSONIG00000002198	Similarity:Belongs to the AAA ATPase family.	pex1	peroxisomal biogenesis factor 1	1	1	no	0	0	0	0	0	0	0	0	0	0
EOG090C07VZ	ENSGACG00000012357	chromosome 17 open reading frame 75	ENSONIG00000002199	chromosome 17 open reading frame 75	zgc:153240	zgc:153240	1	1	no	0	0	0	0	0	0	0	0	0	0
EOG090C0B7V	ENSGACG00000019406	zinc finger protein 207, a	ENSONIG00000002200	zinc finger protein 207, a	znf207a	BUB3-interacting and GLEBS motif-containing protein ZNF207	1	1	no	0	0	0	0	0	0	0	0	0	0
EOG090C03D0	ENSGACG00000012361	GRAM domain containing 1A	ENSONIG00000002201	Transmembrane:Helical	gramd1a	GRAM domain containing 1A	1	1	no	0	0	0	0	0	0	0	0	0	0
EOG090C0867	ENSGACG00000006088;ENSGACG00000006914	TOX high mobility group box family member 2 ;TOX high mobility group box family member 2	ENSONIG00000002202	TOX high mobility group box family member 2			2	1	yes	0	0	0	0	0	1	0	0	0	0
EOG090C06CJ	ENSGACG00000012319	\N	ENSONIG00000002204;ENSONIG00000020460;ENSONIG00000020488;ENSONIG00000020855	Uncharacterized protein ;Uncharacterized protein ;Uncharacterized protein ;Uncharacterized protein	;;;	;;;	1	4	no	0	0	0	0	0	0	0	0	0	0
EOG090C05KA	ENSGACG00000012332;ENSGACG00000012338;ENSGACG00000012343	zona pellucida glycoprotein 3b ;zona pellucida glycoprotein 3b ;zona pellucida glycoprotein 3b	ENSONIG00000002205	zona pellucida glycoprotein 3b		zona pellucida sperm-binding protein 3	3	1	no	0	0	0	0	0	0	0	0	0	0
EOG090C01KY	ENSGACG00000006795	si:dkey-264d12.5	ENSONIG00000002206	coiled-coil domain containing 30	ccdc30	coiled-coil domain containing 30	1	1	no	0	0	0	0	0	0	0	0	0	0
EOG090C00UB	ENSGACG00000012320	trinucleotide repeat containing 6C1	ENSONIG00000002210	trinucleotide repeat containing 6C1	tnrc6c1	trinucleotide repeat containing 6C1	1	1	no	0	0	0	0	0	0	0	0	0	0
EOG090C048Q	ENSGACG00000011551	SHC (Src homology 2 domain containing) transforming protein 2	ENSONIG00000002211	Similarity:Contains SH2 domain.	shc2	SHC (Src homology 2 domain containing) transforming protein 2	1	1	no	0	0	0	0	0	0	0	0	0	0
EOG090C0CFL	ENSGACG00000012360	DnaJ (Hsp40) homolog, subfamily C, member 28	ENSONIG00000002212	DnaJ (Hsp40) homolog, subfamily C, member 28	dnajc28	DnaJ (Hsp40) homolog, subfamily C, member 28	1	1	no	0	0	0	0	0	0	0	0	0	0
EOG090C0EVS	ENSGACG00000012348;ENSGACG00000012351;ENSGACG00000012356;ENSGACG00000012358	PYD and CARD domain containing ;PYD and CARD domain containing ;PYD and CARD domain containing ;\N	ENSONIG00000002216;ENSONIG00000004169	PYD and CARD domain containing ;PYD and CARD domain containing	pycard;	apoptosis-associated speck-like protein containing a CARD ;	4	2	no	0	0	0	0	0	0	0	0	0	0
EOG090C081P	ENSGACG00000012345	ets variant 2	ENSONIG00000002217	Similarity:Belongs to the ETS family.	etv2	ets variant 2	1	1	no	0	0	0	0	0	0	0	0	0	0
EOG090C0AIU	ENSGACG00000005801	RNA binding motif protein 48	ENSONIG00000002218	RNA binding motif protein 48	rbm48	RNA binding motif protein 48	1	1	no	0	0	0	0	0	0	0	0	0	0
EOG090C06T2	ENSGACG00000012340	Fli-1 proto-oncogene, ETS transcription factor b	ENSONIG00000002221	Similarity:Belongs to the ETS family.	fli1b	Fli-1 proto-oncogene, ETS transcription factor b	1	1	no	0	0	0	0	0	0	0	0	0	0
EOG090C03K4	ENSGACG00000006920	phosphatidylinositol glycan anchor biosynthesis, class T	ENSONIG00000002222	phosphatidylinositol glycan anchor biosynthesis, class T	pigt	phosphatidylinositol glycan anchor biosynthesis, class T	1	1	no	0	0	0	0	0	0	0	0	0	0
EOG090C0DCW	ENSGACG00000005798	EF-hand calcium binding domain 1	ENSONIG00000002223	EF-hand calcium binding domain 1	efcab1	EF-hand calcium binding domain 1	1	1	no	0	0	0	0	0	0	0	0	0	0
EOG090C06KC	ENSGACG00000012304;ENSGACG00000019397	septin 9 ;septin 9a	ENSONIG00000002224;ENSONIG00000018125	Similarity:Belongs to the TRAFAC class TrmE-Era-EngA-EngB-Septin-like GTPase superfamily. Septin GTPase family.;Similarity:Belongs to the TRAFAC class TrmE-Era-EngA-EngB-Septin-like GTPase superfamily. Septin GTPase family.	sept9a;sept9b	septin 9a ;septin 9b	2	2	no	0	0	0	0	0	0	0	0	0	0
EOG090C02VD	ENSGACG00000011545	ankyrin repeat domain 24	ENSONIG00000002225	Similarity:Contains 5 ANK repeats.	ankrd24	ankyrin repeat domain 24	1	1	no	0	0	0	0	0	0	0	0	0	0
EOG090C05W8	ENSGACG00000006945	phosphatase and actin regulator 3a	ENSONIG00000002227	Phosphatase and actin regulator	phactr3a	phosphatase and actin regulator 3a	1	1	no	0	0	0	0	0	0	0	0	0	0
EOG090C06JT	ENSGACG00000005790	synaptotagmin-like 1	ENSONIG00000002228	Similarity:Contains 2 C2 domains.			1	1	yes	0	0	0	0	0	0	0	0	1	0
EOG090C0F5H	ENSGACG00000012298;ENSGACG00000019394	hematological and neurological expressed 1b ;hematological and neurological expressed 1a	ENSONIG00000002231;ENSONIG00000018132	hematological and neurological expressed 1b ;hematological and neurological expressed 1a	;jpt1a	;jupiter microtubule associated homolog 1	2	2	yes	0	0	0	0	0	1	0	0	0	0
EOG090C06S1	ENSGACG00000006953	tubulin tyrosine ligase-like family, member 9	ENSONIG00000002232	Similarity:Contains TTL domain.	ttll9	tubulin tyrosine ligase like 9	1	1	no	0	0	0	0	0	0	0	0	0	0
EOG090C06V8	ENSGACG00000011536	Src homology 2 domain containing transforming protein D, b	ENSONIG00000002233	Src homology 2 domain containing transforming protein D, b	shdb	Src homology 2 domain containing transforming protein D, b	1	1	no	0	0	0	0	0	0	0	0	0	0
EOG090C01TT	ENSGACG00000001768	DEAH (Asp-Glu-Ala-His) box polypeptide 16	ENSONIG00000002234	Similarity:Contains helicase ATP-binding domain.	dhx16	DEAH (Asp-Glu-Ala-His) box polypeptide 16	1	1	no	0	0	0	0	0	0	0	0	0	0
EOG090C0G8N	ENSGACG00000012291;ENSGACG00000019390	\N;\N	ENSONIG00000002235	Small ubiquitin-related modifier		small ubiquitin-like modifier 2	2	1	no	0	0	0	0	0	0	0	0	0	0
EOG090C0BUW	ENSGACG00000005777	WAS protein family, member 2	ENSONIG00000002236	WAS protein family, member 2	wasf2	WAS protein family member 2	1	1	no	0	0	0	0	0	0	0	0	0	0
EOG090C03VD	ENSGACG00000012276	nucleoporin 85	ENSONIG00000002239	nucleoporin 85	nup85	nucleoporin 85	1	1	no	0	0	0	0	0	0	0	0	0	0
EOG090C07HJ	ENSGACG00000001479;ENSGACG00000013391	SH3-binding domain protein 5-like, b ;SH3-binding domain protein 5-like, a	ENSONIG00000002241;ENSONIG00000004745	SH3-binding domain protein 5-like, a ;SH3-binding domain protein 5-like, b	sh3bp5la;gtf2h4	SH3 domain-binding protein 5-like ;general transcription factor IIH, polypeptide 4	2	2	no	0	0	0	0	0	0	0	0	0	0
EOG090C02DJ	ENSGACG00000000455;ENSGACG00000013381	gamma-aminobutyric acid (GABA) B receptor, 1b ;gamma-aminobutyric acid (GABA) B receptor, 1a	ENSONIG00000002243;ENSONIG00000011603	Transmembrane:Helical;Transmembrane:Helical	gabbr1a;gabbr1b	gamma-aminobutyric acid (GABA) B receptor, 1a ;gamma-aminobutyric acid (GABA) B receptor, 1b	2	2	yes	0	0	0	0	1	0	0	1	0	0
EOG090C02WK	ENSGACG00000006968	erythrocyte membrane protein band 4.1-like 1	ENSONIG00000002244	Similarity:Contains FERM domain.	si:dkey-178k16.1	si:dkey-178k16.1	1	1	no	0	0	0	0	0	0	0	0	0	0
EOG090C03PQ	ENSGACG00000011508	transducin-like enhancer of split 2 (E(sp1) homolog, Drosophila)	ENSONIG00000002245	transducin-like enhancer of split 2 (E(sp1) homolog, Drosophila)	tle2a	transducin-like enhancer protein 1	1	1	no	0	0	0	0	0	0	0	0	0	0
EOG090C0EZG	ENSGACG00000005776	\N	ENSONIG00000002246	Uncharacterized protein			1	1	no	0	0	0	0	0	0	0	0	0	0
[truncated: 13,242 more rows]

## Sheet: Column_labels
OG_ID	orthogroup ID (OrthoDB v9.1)
stickleback_ENS_ID	stickleback gene ensembl ID
stickleback_gene_description	stickleback gene description from OrthoDB
[truncated: 17 more rows]
